# Supplementary material for: Regioselective synthesis of C3 alkylated and arylated benzothiophenes
Source: PubMed Central journal article supplement (PMC5364387; doi:10.1038/ncomms14801), 2017-03-20
Supplement: ncomms14801-s1.pdf [file ncomms14801-s1.pdf]

## Supplementary methods

### General Experimental

All experiments were performed under an atmosphere of nitrogen, using anhydrous solvents, unless stated otherwise. THF was distilled from sodium/benzophenone and CH<sub>2</sub>Cl<sub>2</sub> was distilled from CaH<sub>2</sub>. All other solvents and reagents were purchased from commercial sources and used as supplied.

<sup>1</sup>H NMR spectra were recorded on a 400 or 500 MHz spectrometer. <sup>13</sup>C NMR spectra were recorded on a 101 or 125 MHz spectrometer. All chemical shift values are reported in ppm, with coupling constants in Hz. Mass spectra were obtained using positive or negative electrospray (ESI), electron ionization (EI), atmospheric sample analysis probe (ASAP), atmospheric pressure chemical ionization (APCI) or gas chromatography-mass spectrometry methodology. Infrared spectra were recorded as evaporated films or neat using FT/IR spectrometers.

Melting points were measured on solids as obtained after chromatography. Column chromatography was carried out using 35 – 70 μ, 60Å silica gel. Routine TLC analysis was carried out on silica gel 60 F254 coated aluminium sheets of 0.2 mm thickness. Plates were viewed using a 254 nm ultraviolet lamp and developed by dipping in aqueous potassium permanganate solution.

## General procedure A. Oxidation of Benzothiophenes

To an oven dried vial under nitrogen was added the benzo[b]thiophene, CH<sub>2</sub>Cl<sub>2</sub> and TFA. H<sub>2</sub>O<sub>2</sub> (30% aq.) was added to the solution at room temperature and the reaction monitored by TLC (5% EtOAc in CHCl<sub>3</sub>). More H<sub>2</sub>O<sub>2</sub> was added until complete consumption of the starting material was observed. The reaction was then quenched with NaHCO<sub>3</sub> at 0 °C and the aqueous phase extracted with CH<sub>2</sub>Cl<sub>2</sub>. The combined organic layers were dried with MgSO<sub>4</sub> and concentrated *in vacuo*. The crude mixture was purified by column chromatography (5% EtOAc in CHCl<sub>3</sub>).

## Benzothiophene S-oxides: Characterization data

### 5-Bromobenzo[b]thiophene S-oxide **1a**

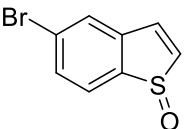 As described in general procedure A, 5-bromobenzo[b]thiophene (213 mg, 1.0 mmol) and H<sub>2</sub>O<sub>2</sub> (0.1 mL, 1.0 mmol) in CH<sub>2</sub>Cl<sub>2</sub> and trifluoroacetic acid (1:1), gave **1a** (171 mg, 0.74 mmol, 74%) as a white solid;  $\delta_{\text{H}}$  (400 MHz, CDCl<sub>3</sub>) 7.12 - 7.20 (2 H, m, ArCH), 7.60 - 7.64 (1 H, m, ArCH), 7.67 (1 H, d, *J* = 1.8 Hz, ArCH), 7.79 (1 H, d, *J* = 8.0 Hz, ArCH);  $\delta_{\text{C}}$  (101 MHz, CDCl<sub>3</sub>) 126.6 (ArCBr), 127.4 (ArCH), 128.1 (ArCH), 131.8 (ArCH), 133.6 (ArCH), 138.9 (ArC), 139.4 (ArCH), 144.0 (ArC);  $\nu_{\text{max}}$  (neat)/cm<sup>-1</sup> 705, 772, 810, 894, 940, 1023, 1095, 1189, 1290, 1313, 1442, 1528, 1573, 3002, 3053, 3074; HRMS (APCI): Calcd. for C<sub>8</sub>H<sub>6</sub>SO (M+H)<sup>+</sup>, 228.9317; found 228.9317.

### 5-Nitrobenzo[b]thiophene S-oxide **1b**

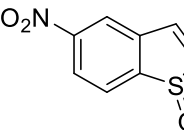 As described in general procedure A, 5-nitrobenzo[b]thiophene (179 mg, 1.0 mmol) and H<sub>2</sub>O<sub>2</sub> (0.1 mL, 1.0 mmol) in CH<sub>2</sub>Cl<sub>2</sub> and trifluoroacetic acid (1:1), gave **1b** (146 mg, 0.73 mmol, 73%) as a yellow solid;  $\delta_{\text{H}}$  (400 MHz, CDCl<sub>3</sub>) 7.34 (2 H, s, ArCH), 8.09 - 8.15 (1 H, m, ArCH), 8.37 (2 H, dq, *J* = 4.4, 2.1 Hz, ArCH);  $\delta_{\text{C}}$  (101 MHz, CDCl<sub>3</sub>) 120.2 (ArCH), 124.2 (ArCH), 127.4 (ArCH), 133.5 (ArC), 138.8 (ArC), 141.2 (ArCH), 150.8 (ArC), 151.4 (ArCH);  $\nu_{\text{max}}$  (neat)/cm<sup>-1</sup> 736, 843, 953, 1021, 1045, 1094, 1200, 1290, 1347, 1526, 3060, 3077; HRMS (APCI): Calcd. for C<sub>8</sub>H<sub>6</sub>SO<sub>3</sub>N (M+H)<sup>+</sup>, 196.0063; found 196.0063.

### Methyl benzo[*b*]thiophene-2-carboxylate 1-oxide<sup>1</sup> **1c**

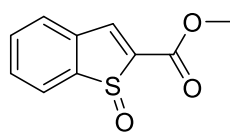

As described in general procedure **A**, methyl benzo[*b*]thiophene-2-carboxylate (96.1 mg, 0.5 mmol) and H<sub>2</sub>O<sub>2</sub> (0.05 mL, 0.5 mmol) in CH<sub>2</sub>Cl<sub>2</sub> and trifluoroacetic acid (1:1), gave **1c** (76.4 mg, 0.36 mmol, 72%) as a yellow solid;  $\delta_{\text{H}}$  (400 MHz, CDCl<sub>3</sub>) 3.98 (3 H, s, CH<sub>3</sub>), 7.57 - 7.66 (3 H, m, ArCH), 7.94 - 7.98 (2 H, m, ArCH);  $\delta_{\text{C}}$  (101 MHz, CDCl<sub>3</sub>) 53.3 (CH<sub>3</sub>), 127.2 (ArCH), 127.3 (ArCH), 131.9 (ArCH), 132.7 (ArCH), 135.4 (ArC), 142.8 (ArCH), 143.5 (ArC), 147.0 (ArC), 161.8 (C=O);  $\nu_{\text{max}}$  (neat)/cm<sup>-1</sup> 756, 850, 947, 1032, 1068, 1175, 1234, 1341, 1434, 1561, 1714, 2959, 3046; **HRMS** (APCI): Calcd. for C<sub>10</sub>H<sub>9</sub>SO<sub>3</sub> (M+H)<sup>+</sup>, 209.0267; found 209.0260.

### 2-Phenylbenzo[*b*]thiophene *S*-oxide **1d**

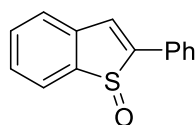

As described in general procedure **A**, 2-phenylbenzo[*b*]thiophene (186 mg, 1.0 mmol) and H<sub>2</sub>O<sub>2</sub> (0.1 mL, 1.0 mmol) in CH<sub>2</sub>Cl<sub>2</sub> and trifluoroacetic acid (1:1), gave **1d** (153 mg, 0.76 mmol, 76%) as a yellow solid;  $\delta_{\text{H}}$  (400 MHz, CDCl<sub>3</sub>) 7.28 (1 H, s, ArCH), 7.39 - 7.56 (6 H, m, ArCH), 7.78 - 7.84 (2 H, m, ArCH), 7.94 (1 H, dd, *J* = 7.5, 0.8 Hz, ArCH);  $\delta_{\text{C}}$  (101 MHz, CDCl<sub>3</sub>) 124.5 (ArCH), 126.4 (ArCH), 126.6 (ArCH), 127.0 (ArCH), 128.4 (ArCH), 129.2 (ArCH), 129.5 (ArCH), 130.8 (ArC), 132.3 (ArCH), 137.7 (ArC), 144.2 (ArC), 152.4 (ArC);  $\nu_{\text{max}}$  (neat)/cm<sup>-1</sup> 682, 731, 894, 996, 1061, 1447, 1585, 3050; **HRMS** (APCI): Calcd. for C<sub>14</sub>H<sub>11</sub>SO (M)<sup>+</sup>, 227.0525; found 227.0524.

### 2-Bromobenzo[*b*]thiophene *S*-oxide **1e**

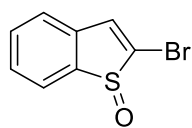

As described in general procedure **A**, 2-bromobenzo[*b*]thiophene (0.21 g, 1.0 mmol) and H<sub>2</sub>O<sub>2</sub> (0.1 mL, 1.0 mmol) in CH<sub>2</sub>Cl<sub>2</sub> and trifluoroacetic acid (1:1), gave **1e** (0.13 g, 0.57 mmol, 57%) as an orange oil;  $\delta_{\text{H}}$  (400 MHz, CDCl<sub>3</sub>) 7.23 (1 H, d, *J* = 0.5 Hz, ArCH), 7.36 - 7.49 (3 H, m, ArCH), 7.82 (1 H, dt, *J* = 7.4, 0.6 Hz, ArCH);  $\delta_{\text{C}}$  (101 MHz, CDCl<sub>3</sub>) 123.9 (ArCH), 126.3 (ArCH), 128.5 (ArCH), 131.6 (ArC), 132.4 (ArCH), 134.3 (ArCH), 137.3 (ArC), 145.2 (ArC);  $\nu_{\text{max}}$  (neat)/cm<sup>-1</sup> 700, 772, 819, 888, 942, 1023, 1078, 1190, 1278, 1308, 1441, 1519, 1599, 3017; **HRMS** (EI): Calcd. for C<sub>8</sub>H<sub>5</sub>SBrO (M)<sup>+</sup>, 227.9244; found 227.9240.

## 2-Cyanobenzo[b]thiophene S-oxide **1f**

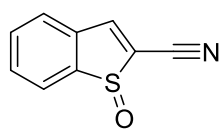

As described in general procedure **A**, 2-cyanobenzo[b]thiophene (159 mg, 1.0 mmol) and H<sub>2</sub>O<sub>2</sub> (0.1 mL, 1.0 mmol) in CH<sub>2</sub>Cl<sub>2</sub> and trifluoroacetic acid (1:1), gave **1f** (87.4 mg, 0.5 mmol, 50%) as an orange oil;  $\delta_{\text{H}}$  (400 MHz, CDCl<sub>3</sub>) 7.64 - 7.74 (3 H, m, ArCH), 7.83 (1 H, d, *J* = 0.5 Hz, ArCH), 7.97 (1 H, d, *J* = 7.1 Hz, ArCH);  $\delta_{\text{C}}$  (101 MHz, CDCl<sub>3</sub>) 112.3 (ArC), 125.0 (CN), 126.9 (ArCH), 127.1 (ArCH), 132.2 (ArCH), 133.1 (ArCH), 134.7 (ArC), 145.7 (ArC), 145.9 (ArCH);  $\nu_{\text{max}}$  (neat)/cm<sup>-1</sup> 773, 919, 1040, 1065, 1078, 1198, 1442, 1548, 2220, 3050, 3058, 3082; **HRMS** (APCI): Calcd. for C<sub>9</sub>H<sub>6</sub>SON (M+H)<sup>+</sup>, 176.0165; found 176.0160.

## 2-Methylbenzo[b]thiophene S-oxide **1g**

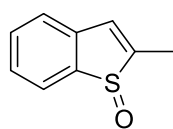

As described in general procedure **A**, 2-methylbenzo[b]thiophene (296 mg, 2.0 mmol) and H<sub>2</sub>O<sub>2</sub> (0.2 mg, 2.0 mmol) in CH<sub>2</sub>Cl<sub>2</sub> and trifluoroacetic acid (1:1), gave **1g** (283 mg, 0.17 mmol, 86%) as a yellow solid;  $\delta_{\text{H}}$  (400 MHz, CDCl<sub>3</sub>) 2.39 (3 H, d, *J* = 1.5 Hz, CH<sub>3</sub>), 6.78 (1 H, s, ArCH), 7.33 - 7.40 (2 H, m, ArCH), 7.42 - 7.49 (1 H, m, ArCH), 7.85 (1 H, d, *J* = 7.5 Hz, ArCH);  $\delta_{\text{C}}$  (101 MHz, CDCl<sub>3</sub>) 13.0 (CH<sub>3</sub>), 123.6 (ArCH), 126.2 (ArCH), 127.6 (ArCH), 128.6 (ArCH), 132.0 (ArCH), 138.1 (ArC), 144.5 (ArC), 150.4 (ArC);  $\nu_{\text{max}}$  (neat)/cm<sup>-1</sup> 762, 901, 1021, 1057, 1447, 1459, 1587, 1711, 2911, 3047; **HRMS** (APCI): Calcd. for C<sub>9</sub>H<sub>9</sub>SO (M+H)<sup>+</sup>, 165.0369; found 165.0370.

## 2-Pentylbenzo[b]thiophene S-oxide **1h**

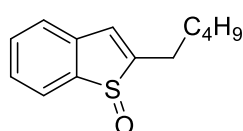

As described in general procedure **A**, 2-pentylbenzo[b]thiophene (0.37 g, 1.79 mmol) and H<sub>2</sub>O<sub>2</sub> (0.18 mL, 1.79 mmol) in CH<sub>2</sub>Cl<sub>2</sub> and trifluoroacetic acid (1:1), gave **1h** (0.30 g, 1.37 mmol, 76%) as an orange oil;  $\delta_{\text{H}}$  (400 MHz, CDCl<sub>3</sub>) 0.93 (3 H, t, *J* = 7.1 Hz, CH<sub>3</sub>), 1.34 - 1.47 (4 H, m, 2 × CH<sub>2</sub>), 1.67 - 1.85 (2 H, m, CH<sub>2</sub>), 2.74 (2 H, td, *J* = 7.6, 1.5 Hz, CH<sub>2</sub>), 6.77 (1 H, d, *J* = 0.6 Hz, ArCH), 7.34 - 7.41 (2 H, m, ArCH), 7.44 - 7.51 (1 H, m, ArCH), 7.84 - 7.90 (1 H, m, ArCH);  $\delta_{\text{C}}$  (101 MHz, CDCl<sub>3</sub>) 14.0 (CH<sub>3</sub>), 22.3 (CH<sub>2</sub>), 27.3 (CH<sub>2</sub>), 28.4 (CH<sub>2</sub>), 31.3 (CH<sub>2</sub>), 123.7 (ArCH), 126.2 (ArCH), 127.5 (ArCH), 127.6 (ArCH), 132.0 (ArCH), 138.1 (ArC), 144.3 (ArC), 155.5 (ArC);  $\nu_{\text{max}}$  (neat)/cm<sup>-1</sup> 692, 734, 878, 976, 1069, 1444, 1582, 2846, 2968, 3050; **HRMS** (APCI): Calcd. for C<sub>13</sub>H<sub>16</sub>SO (M)<sup>+</sup>, 220.0922; found 220.0920.

### 5-[4-(Trifluoromethyl)phenyl]benzo[b]thiophene *S*-oxide **1i**

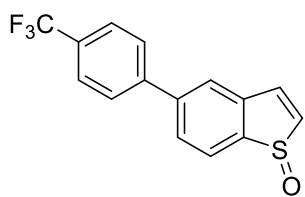

As described in general procedure **A**, to 5-(4-(trifluoromethyl)phenyl)benzo[b]thiophene (59.2 mg, 0.21 mmol) and H<sub>2</sub>O<sub>2</sub> (0.02 mL, 0.21 mmol) in CH<sub>2</sub>Cl<sub>2</sub> and trifluoroacetic acid (1:1), gave **1i** (50.1 mg, 0.17 mmol, 85%) as a brown solid;  $\delta_{\text{H}}$  (400 MHz, CDCl<sub>3</sub>) 7.18 (1 H, d,  $J = 6.0$  Hz, ArCH), 7.30 (1 H, dd,  $J = 6.1, 0.6$  Hz, ArCH), 7.67 - 7.77 (6 H, m, ArCH), 8.03 (1 H, d,  $J = 7.8$  Hz, ArCH);  $\delta_{\text{C}}$  (101 MHz, CDCl<sub>3</sub>) 124.0 (q,  $J = 271.9$  Hz, CF<sub>3</sub>), 123.8 (ArCH), 126.0 (q,  $J = 3.6$  Hz, ArCH), 126.7 (ArCH), 127.7 (ArCH), 127.9 (ArCH), 130.5 (q,  $J = 32.8$  Hz, ArCCF<sub>3</sub>), 134.5 (ArCH), 138.0 (ArC), 138.7 (ArCH), 143.0 (ArC), 143.9 (ArC), 144.8 (ArC);  $\nu_{\text{max}}$  (neat)/cm<sup>-1</sup> 770, 841, 942, 1013, 1069, 1108, 1177, 1323, 1596, 1617, 3049; **HRMS** (APCI): Calcd. for C<sub>15</sub>H<sub>10</sub>SOF<sub>3</sub> (M+H)<sup>+</sup>, 295.0399; found 295.0389.

### General procedure B. Coupling of benzo[b]thiophene *S*-oxides with phenols

The thiophene *S*-oxide (**1**) (0.2 mmol) was dissolved in CH<sub>2</sub>Cl<sub>2</sub> (1 mL, 0.2 M) in an oven-dried tube flushed with N<sub>2</sub>. TFAA (0.3 mmol, 1.5 equiv.) was then added at -40 °C. After 5 min, the corresponding phenol (**2**) (1.5 equiv.) dissolved in CH<sub>2</sub>Cl<sub>2</sub> (1 mL) was added and the mixture stirred for 15 min at -40°C before removing the cooling bath and stirring the mixtures at ambient temperature overnight (16 h). *p*TsOH (2 equiv.) or I<sub>2</sub> (2 equiv.) or TFA (4 equiv.) (indicated in each case) was then added, and the mixture was heated at 45 °C for 5 h. The solution was quenched with H<sub>2</sub>O (3 mL), and the aqueous layer was extracted with CH<sub>2</sub>Cl<sub>2</sub> (3 x 5 mL). The combined organic layers were dried (MgSO<sub>4</sub>) and concentrated *in vacuo*. The crude product was purified by column chromatography on silica gel eluting with toluene (indicated if different eluent was used).

### General procedure C. Coupling of benzo[b]thiophene with phenols-*in situ* oxidation and coupling.

The benzothiophene (**1**) (0.5 mmol) was dissolved in CH<sub>2</sub>Cl<sub>2</sub> (2 mL, 0.25 M) in an oven-dried tube flushed with N<sub>2</sub> at -20 °C and BF<sub>3</sub>·OEt<sub>2</sub> (8 equiv.) was added. *m*CPBA (1.2 equiv.) in CH<sub>2</sub>Cl<sub>2</sub> (1 mL) was then added in portions over 1.5 h at the same temperature. The reaction was monitored by TLC, and after the disappearance of the starting material, saturated Na<sub>2</sub>CO<sub>3</sub> (0.2 mL) was added to the mixture, followed by K<sub>2</sub>CO<sub>3</sub> (100 mg) at -20 °C. The mixture was then filtered through a plug loaded with MgSO<sub>4</sub> and K<sub>2</sub>CO<sub>3</sub>, washing with CH<sub>2</sub>Cl<sub>2</sub> (5 mL). The resulting solution was cooled to -40°C and TFAA (0.3 mmol, 1.5

equiv.) was added. After 5 min, the corresponding phenol (**2**) (1.5 equiv.) dissolved in CH<sub>2</sub>Cl<sub>2</sub> (1 mL) was added, and the mixture stirred for 15 min at -40°C before removing the cooling bath and stirring the mixtures at ambient temperature overnight (16 h). *p*TsOH (2 equiv.) or I<sub>2</sub> (2 equiv.) was then added, and the mixture was heated at 45 °C for 5h. The solution was quenched with H<sub>2</sub>O (8 mL) and the aqueous layer was extracted with CH<sub>2</sub>Cl<sub>2</sub> (3 × 5 mL). The combined organic layers were dried (MgSO<sub>4</sub>) and concentrated *in vacuo*. The crude product was purified by column chromatography on silica gel eluting with toluene (indicated if different eluent was used).

### C3 arylation. Characterization data.

#### 9-Bromo-5a,10b-dihydrobenzo[4,5]thieno[2,3-b]benzofuran **3a**

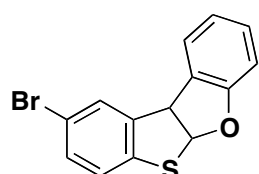

5-Bromo-benzo[*b*]thiophene *S*-oxide (**1a**) (0.2 mmol) was dissolved in CH<sub>2</sub>Cl<sub>2</sub> (1 mL, 0.2 M) in an oven-dried tube flushed with N<sub>2</sub>. TFAA (41 μl, 0.3 mmol) was then added at -40 °C. After 5 min, phenol (**2f**) (29 mg, 0.3 mmol), dissolved in CH<sub>2</sub>Cl<sub>2</sub> (1 mL), was added at the same temperature. The mixture was then allowed to warm to room temperature and stirred overnight. The solution was quenched with H<sub>2</sub>O (3 mL) and the aqueous layer was extracted with CH<sub>2</sub>Cl<sub>2</sub> (3 x 5 mL). The combined organic layers were dried (MgSO<sub>4</sub>) and concentrated *in vacuo*. Purification by column chromatography on silica gel eluting with 5% AcOEt in *n*-hexanes, gave **3a** (41 mg, 0.134 mmol, 67%) as white solid; δ<sub>H</sub> (400 MHz, CDCl<sub>3</sub>) 5.23 (1 H, d, *J* = 8.0 Hz, *CH*), 6.88 (2 H, d, *J* = 8.0 Hz, *CH* + *ArCH*), 6.98 (1 H, td, *J* = 7.5, 0.9 Hz, *ArCH*), 7.05 (1 H, d, *J* = 8.5 Hz, *ArCH*), 7.17 - 7.24 (1 H, m, *ArCH*), 7.29 (1 H, ddd, *J* = 8.3, 1.9, 0.8 Hz, *ArCH*), 7.41 (1 H, d, *J* = 7.5 Hz, *ArCH*), 7.51 (1 H, dd, *J* = 1.9, 0.9 Hz, *ArCH*); δ<sub>C</sub> (101 MHz, CDCl<sub>3</sub>) 56.5 (*CH*), 95.2 (*CH*), 110.7 (*ArCH*), 118.6 (*ArCBr*), 122.1 (*ArCH*), 123.5 (*ArCH*), 124.2 (*ArCH*), 127.0 (*ArC*), 127.7 (*ArCH*), 129.6 (*ArCH*), 131.7 (*ArCH*), 138.4 (*ArC*), 141.8 (*ArC*), 158.4 (*ArC*). HRMS (ESI): Calcd. for C<sub>14</sub>H<sub>9</sub>OSBr (M-H)<sup>+</sup>, 303.9550; found 303.9952.

#### 2-(5-Bromobenzo[*b*]thiophen-3-yl)-4-methylphenol **4a**

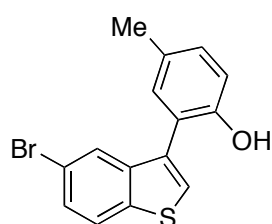

As described in general procedure **B**, 5-bromo-benzo[*b*]thiophene *S*-oxide (**1a**) (46 mg, 0.2 mmol), *p*-cresol (**2a**) (32 mg, 0.3 mmol), trifluoroacetic anhydride (41 μl, 0.3 mmol) and *p*TsOH (69 mg, 0.4 mmol), gave **4a** (49 mg, 0.154 mmol, 77%) as a colourless oil; δ<sub>H</sub>

(500 MHz, CDCl<sub>3</sub>) 2.35 (3H, s, CH<sub>3</sub>), 4.85 (1 H, s, OH), 6.95 (1 H, d, *J* = 8.2 Hz, ArCH), 7.09 (1 H, d, *J* = 2.1 Hz, ArCH), 7.17 - 7.14 (1 H, m, ArCH), 7.51 (2 H, d, *J* = 8.9 Hz, ArCH), 7.80 - 7.76 (2 H, m, ArCH); δ<sub>C</sub> (126 MHz, CDCl<sub>3</sub>) 20.6 (CH<sub>3</sub>), 116.0 (ArCH), 119.0 (ArC), 120.9 (ArC), 124.3 (ArCH), 126.0 (ArCH), 127.1 (ArCH), 128.1 (ArCH), 130.2 (ArC), 130.7 (ArCH), 131.3 (ArCH), 132.2 (ArC), 139.2 (ArC), 140.1 (ArC), 151.1 (ArC); ν<sub>max</sub> (neat)/cm<sup>-1</sup> 729, 779, 820, 872, 1063, 1181, 1275, 1494, 1579, 2919, 3090, 3520. HRMS (ESI): Calcd. for C<sub>15</sub>H<sub>10</sub>OBrS (M-H)<sup>+</sup>, 316.9641; found 316.9633.

#### 4-Bromo-2-(5-bromobenzo[*b*]thiophen-3-yl)phenol **4b**

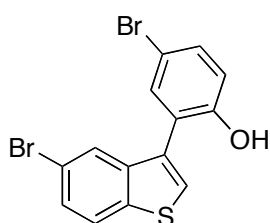

As described in general procedure **B**, 5-bromo-benzo[*b*]thiophene *S*-oxide (**1a**) (46 mg, 0.2 mmol), 4-bromophenol (**2b**) (52 mg, 0.3 mmol), trifluoroacetic anhydride (41 μl, 0.3 mmol) and *p*TsOH (69 mg, 0.4 mmol), gave **4b** (54 mg, 0.14 mmol, 70%) as a white solid; **m.p.**: 115-116 °C; δ<sub>H</sub> (400 MHz, CDCl<sub>3</sub>) 6.94 (1 H, d, *J* = 8.6 Hz, ArCH), 7.41 (1 H, d, *J* = 2.4 Hz, ArCH), 5.02 (1 H, s, OH), 7.45 (1 H, dd, *J* = 8.6, 2.5 Hz, ArCH), 7.49 - 7.55 (2 H, m, ArCH), 7.73 (1 H, d, *J* = 1.8 Hz, ArCH), 7.79 (1 H, d, *J* = 8.6 Hz, ArCH); δ<sub>C</sub> (101 MHz, CDCl<sub>3</sub>) 112.9 (ArC), 118.0 (ArCH), 119.3 (ArC), 123.2 (ArC), 124.4 (ArCH), 125.7 (ArCH), 128.0 (ArCH), 128.4 (ArCH), 130.5 (ArC), 132.9 (ArCH), 133.3 (ArCH), 139.2 (ArC), 139.5 (ArC), 152.6 (ArC); ν<sub>max</sub> (neat)/cm<sup>-1</sup> 665, 753, 1063, 1209, 1268, 1392, 1426, 1472, 2923, 3089, 3512; HRMS (ESI): Calcd. for C<sub>14</sub>H<sub>7</sub>OBr<sub>2</sub>S (M-H)<sup>+</sup>, 380.8579; found 380.8584.

#### 2-(5-Bromobenzo[*b*]thiophen-3-yl)-4-iodophenol **4c**

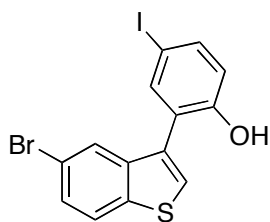

As described in general procedure **B**, 5-bromo-benzo[*b*]thiophene *S*-oxide (**1a**) (46 mg, 0.2 mmol), 4-iodophenol (**2c**) (66 mg, 0.3 mmol), trifluoroacetic anhydride (41 μl, 0.3 mmol) and TFA (61 μl, 0.8 mmol), gave **4c** (49 mg, 0.112 mmol, 56%) as a white solid; **m.p.**: 112-114 °C; δ<sub>H</sub> (500 MHz, CDCl<sub>3</sub>) 4.97 (s, 1H, OH), 6.83 (1 H, d, *J* = 8.6 Hz, ArCH), 7.51 - 7.54 (2 H, m, ArCH), 7.59 (1 H, d, *J* = 2.2 Hz, ArCH), 7.63 (1 H, dd, *J* = 8.6, 2.2 Hz, ArCH), 7.72 (1 H, dd, *J* = 1.9, 0.6 Hz, ArCH), 7.79 (1 H, dd, *J* = 8.6, 0.6 Hz, ArCH); δ<sub>C</sub> (126 MHz, CDCl<sub>3</sub>) 82.7 (ArC), 118.5 (ArCH), 119.3 (ArC), 123.8 (ArC), 124.4 (ArCH), 125.8 (ArCH), 128.0 (ArCH), 128.5 (ArCH), 130.4 (ArC), 138.9 (ArCH), 139.2 (ArCH), 139.6 (ArC), 153.5 (ArC); ν<sub>max</sub> (neat)/cm<sup>-1</sup> 753, 791, 1063, 1168, 1209, 1268,

1425, 1471, 1579, 3088, 3509; **HRMS** (ESI): Calcd. for C<sub>14</sub>H<sub>7</sub>OBrIS (M-H)<sup>+</sup>, 428.8451; found 428.8442.

#### Methyl 3-(5-bromobenzo[b]thiophen-3-yl)-4-hydroxybenzoate **4d**

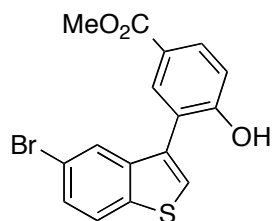

As described in general procedure **B**, 5-bromo-benzo[b]thiophene *S*-oxide (**1a**) (46 mg, 0.2 mmol), methyl 4-hydroxybenzoate (**2d**) (46 mg, 0.3 mmol), trifluoroacetic anhydride (41  $\mu$ l, 0.3 mmol) and TFA (61  $\mu$ l, 0.8 mmol), gave **4d** (56 mg, 0.154 mmol, 77%) as a white solid; **m.p**: 177-179°C;  $\delta_{\text{H}}$  (500 MHz, CDCl<sub>3</sub>) 3.89 (3 H, d,  $J$  = 1.0 Hz, OCH<sub>3</sub>), 5.72 (1 H, s, OH), 7.09 (1 H, d,  $J$  = 8.5 Hz, ArCH), 7.51 (1 H, dd,  $J$  = 8.6, 1.7 Hz, ArCH), 7.54 (1 H, s, ArCH), 7.70 (1 H, d,  $J$  = 1.7 Hz, ArCH), 7.79 (1 H, d,  $J$  = 8.6 Hz, ArCH), 8.00 (1 H, d,  $J$  = 2.1 Hz, ArCH), 8.04 (1 H, dd,  $J$  = 8.5, 2.0 Hz, ArCH);  $\delta_{\text{C}}$  (126 MHz, CDCl<sub>3</sub>) 52.2 (OCH<sub>3</sub>), 116.2 (ArCH), 119.2 (ArC), 121.3 (ArC), 123.0 (ArC), 124.4 (ArCH), 125.8 (ArCH), 128.0 (ArCH), 128.3 (ArCH), 130.9 (ArC), 132.0 (ArCH), 133.0 (ArCH), 139.2 (ArC), 139.8 (ArC), 157.6 (ArC), 166.8 (C=O);  $\nu_{\text{max}}$  (neat)/cm<sup>-1</sup> 769, 831, 1067, 1123, 1277, 1403, 1428, 1597, 1687, 3278; **HRMS** (APCI): Calcd. for C<sub>16</sub>H<sub>12</sub>O<sub>3</sub>BrS (M+H)<sup>+</sup>, 362.9685; found 362.9682.

#### Methyl 3-(5-bromobenzo[b]thiophen-3-yl)-4-hydroxybenzoate **4e**

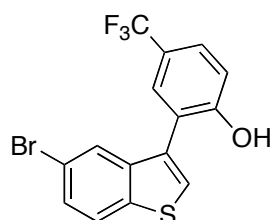

As described in general procedure **B**, 5-bromo-benzo[b]thiophene *S*-oxide (**1a**) (46 mg, 0.2 mmol), 4-(trifluoromethyl)phenol (**2e**) (49 mg, 0.3 mmol), trifluoroacetic anhydride (41  $\mu$ l, 0.3 mmol) and *p*TsOH (69 mg, 0.4 mmol), gave **4e** (60 mg, 0.16 mmol, 80%) as a white solid; **m.p**: 113-114 °C;  $\delta_{\text{H}}$  (400 MHz, CDCl<sub>3</sub>) 5.31 (1 H, d,  $J$  = 3.4 Hz, OH), 7.15 (1 H, d,  $J$  = 8.6 Hz, ArCH), 7.54 (1 H, dd,  $J$  = 8.6, 1.8 Hz, ArCH), 7.58 (2 H, d,  $J$  = 3.4 Hz, ArCH), 7.63 (1 H, dd,  $J$  = 8.6, 2.3 Hz, ArCH), 7.69 (1 H, dd,  $J$  = 1.9, 0.5 Hz, ArCH), 7.82 (1 H, d,  $J$  = 8.5 Hz, ArCH);  $\delta_{\text{C}}$  (101 MHz, CDCl<sub>3</sub>) 116.5 (ArCH), 119.4 (ArC), 121.6 (ArC), 123.5 (q,  $J$  = 33.0 Hz, ArC), 124.2 (q,  $J$  = 273 Hz, CF<sub>3</sub>), 124.5 (ArCH), 125.6 (ArCH), 127.5 (q,  $J$  = 3.7 Hz, ArCH), 128.3 (q,  $J$  = 3.7 Hz, ArCH), 128.4 (ArCH), 128.6 (ArCH), 130.4 (ArC), 139.3 (ArC), 139.5 (ArC), 156.1 (ArC);  $\delta_{\text{F}}$  (376 MHz, CDCl<sub>3</sub>) -61.5;  $\nu_{\text{max}}$  (neat)/cm<sup>-1</sup> 753, 832, 1066, 1108, 1206, 1277, 1316, 1431, 1499, 1587, 1625, 3094, 3446; **HRMS** (ESI): Calcd. for C<sub>15</sub>H<sub>7</sub>OBrF<sub>3</sub>S (M-H)<sup>+</sup>, 370.9359; found 370.9351.



### 2-(Benzo[*b*]thiophen-3-yl)phenol **4f**

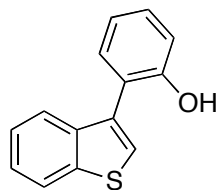

As described in general procedure **C**, benzo[*b*]thiophene (67 mg, 0.5 mmol), phenol (**2f**) (90 mg, 0.75 mmol), trifluoroacetic anhydride (105  $\mu$ l, 0.75 mmol) and *p*TsOH (172 mg, 1 mmol), gave **4f** (58 mg, 0.395 mmol, 79 %) as a white solid; **m.p.**: 82-83 °C;  $\delta_{\text{H}}$  (400 MHz,  $\text{CDCl}_3$ ) 5.12 (s, 1H, OH), 7.02 - 7.10 (2 H, m, ArCH), 7.32 - 7.39 (2 H, m, ArCH), 7.46 - 7.39 (2 H, m, ArCH), 7.51 (1 H, s, ArCH), 7.64 - 7.69 (1 H, m, ArCH), 7.93 - 7.98 (1 H, m, ArCH);  $\delta_{\text{C}}$  (101 MHz,  $\text{CDCl}_3$ ) 116.0 (ArCH), 120.8 (ArCH), 121.7 (ArC), 123.0 (ArCH), 123.2 (ArCH), 124.8 (ArCH), 125.1 (ArCH), 125.7 (ArCH), 129.9 (ArCH), 130.9 (ArCH), 132.4 (ArC), 138.2 (ArC), 140.7 (ArC), 153.5 (ArC);  $\nu_{\text{max}}$  (neat)/ $\text{cm}^{-1}$  729, 752, 839, 1176, 1212, 1345, 1447, 1476, 1576, 3058, 3521; **HRMS** (ESI): Calcd. for  $\text{C}_{14}\text{H}_9\text{OS}$  (M-H)<sup>+</sup>, 225.0369; found 225.0366.

### 2-(Benzo[*b*]thiophen-3-yl)-4-nitrophenol **4g**

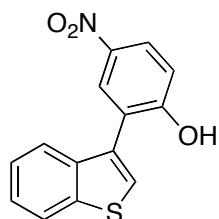

As described in general procedure **C**, benzo[*b*]thiophene (67 mg, 0.5 mmol), 4-nitrophenol (**2g**) (104 mg, 0.75 mmol), trifluoroacetic anhydride (105  $\mu$ l, 0.75 mmol) and *p*TsOH (172 mg, 1 mmol), gave **4g** (115 mg, 0.375 mmol, 85 %) as a yellow solid; **m.p.**: 122-123 °C;  $\delta_{\text{H}}$  (500 MHz,  $\text{CDCl}_3$ ) 5.84 (1 H, s, OH), 7.16 (1 H, d,  $J = 8.9$  Hz, ArCH), 7.42 - 7.51 (2 H, m, ArCH), 7.57 - 7.62 (2 H, m, ArCH), 7.95 - 8.01 (1 H, m, ArCH), 8.23 - 8.30 (2 H, m, ArCH);  $\delta_{\text{C}}$  (126 MHz,  $\text{CDCl}_3$ ) 116.53 (ArCH), 122.43 (ArC), 122.61 (ArCH), 123.33 (ArCH), 125.35 (ArCH), 125.64 (ArCH), 125.94 (ArCH), 127.02 (ArCH), 127.34 (ArCH), 129.61 (ArC), 137.35 (ArCH), 140.84 (ArC), 141.71 (ArC), 159.04 (ArC);  $\nu_{\text{max}}$  (neat)/ $\text{cm}^{-1}$  752, 763, 1082, 1274, 1328, 1480, 1534, 1581, 3095, 3336; **HRMS** (ESI): Calcd. for  $\text{C}_{14}\text{H}_8\text{O}_3\text{NS}$  (M-H)<sup>+</sup>, 270.0230; found 270.0220.

### [3-(Benzo[*b*]thiophen-3-yl)-4-hydroxyphenyl](phenyl)methanone **4h**

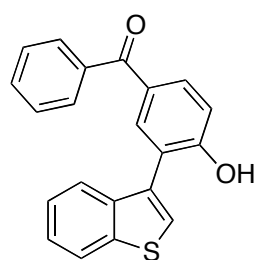

As described in general procedure **C**, benzo[*b*]thiophene (67 mg, 0.5 mmol), 4-hydroxybenzophenone (**2h**) (148 mg, 0.75 mmol), trifluoroacetic anhydride (105  $\mu$ l, 0.75 mmol) and *p*TsOH (172 mg, 1 mmol), gave **4h** (152 mg, 0.46 mmol, 92 %) as a white solid; **m.p.**: 180-183 °C;  $\delta_{\text{H}}$  (400 MHz,  $\text{CDCl}_3$ ) 5.68 - 5.75 (1 H, m, OH), 7.14 - 7.17 (1 H, m, ArCH), 7.42 - 7.44 (2 H, m, ArCH), 7.47 (2 H, t,  $J = 7.6$  Hz, ArCH), 7.56 (2 H, d,  $J =$

5.9 Hz, *ArCH*), 7.64 (1 H, dd,  $J = 6.9, 2.1$  Hz, *ArCH*), 7.79 - 7.82 (2 H, m, *ArCH*), 7.86 - 7.89 (2 H, m, *ArCH*), 7.95 (1 H, dd,  $J = 6.9, 2.0$  Hz, *ArCH*);  $\delta_{\text{C}}$  (101 MHz,  $\text{CDCl}_3$ ) 115.9 (*ArCH*), 121.8 (*ArC*), 123.0 (*ArCH*), 123.2 (*ArCH*), 125.0 (*ArCH*), 125.3 (*ArCH*), 126.5 (*ArCH*), 128.4 (*ArCH*), 129.9 (*ArCH*), 130.5 (*ArC*), 131.1 (*ArC*), 132.2 (*ArCH*), 132.7 (*ArCH*), 133.8 (*ArCH*), 137.8 (*ArC*), 138.2 (*ArC*), 140.8 (*ArC*), 157.5 (*ArC*), 195.6 ( $\text{C}=\text{O}$ );  $\nu_{\text{max}}$  (neat)/ $\text{cm}^{-1}$  701, 718, 835, 922, 1112, 1232, 1273, 1428, 1552, 1626, 3068; **HRMS** (APCI): Calcd. for  $\text{C}_{21}\text{H}_{15}\text{O}_2\text{S}$  ( $\text{M}+\text{H}$ ) $^+$ , 331.0787; found 331.0785.

### 2-(Benzo[*b*]thiophen-3-yl)-6-bromophenol **4i**

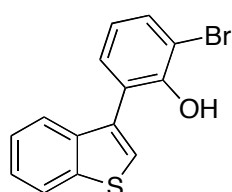

As described in general procedure **C**, benzo[*b*]thiophene (67 mg, 0.5 mmol), 2-bromophenol (**2i**) (130 mg, 0.75 mmol), trifluoroacetic anhydride (105  $\mu\text{l}$ , 0.75 mmol) and *p*TsOH (172 mg, 1 mmol), gave **4i** (78 mg, 0.255 mmol, 51 %) as a colourless oil;  $\delta_{\text{H}}$  (400 MHz,  $\text{CDCl}_3$ ) 5.66 (s, 1H, *OH*), 6.93 (1 H, t,  $J = 7.7$  Hz, *ArCH*), 7.34 (1 H, dd,  $J = 7.7, 1.6$  Hz, *ArCH*), 7.34 - 7.46 (2 H, m, *ArCH*), 7.52 (1 H, s, *ArCH*), 7.56 (1 H, dd,  $J = 8.0, 1.6$  Hz, *ArCH*), 7.64 - 7.69 (1 H, m, *ArCH*), 7.91 - 7.97 (1 H, m, *ArCH*);  $\delta_{\text{C}}$  (101 MHz,  $\text{CDCl}_3$ ) 110.9 (*ArC*), 121.7 (*ArCH*), 123.0 (*ArCH*), 123.3 (*ArCH*), 123.6 (*ArC*), 124.6 (*ArCH*), 124.8 (*ArCH*), 125.8 (*ArCH*), 130.8 (*ArCH*), 132.3 (*ArCH*), 132.5 (*ArC*), 138.2 (*ArC*), 140.3 (*ArC*), 150.2 (*ArC*);  $\nu_{\text{max}}$  (neat)/ $\text{cm}^{-1}$  731, 840, 953, 1112, 1162, 1215, 1234, 1318, 1438, 3055, 3447; **HRMS** (ESI): Calcd. for  $\text{C}_{14}\text{H}_8\text{OBrS}$  ( $\text{M}-\text{H}$ ) $^+$ , 302.9485; found 302.9477.

### 2-(Benzo[*b*]thiophen-3-yl)-6-nitrophenol **4j**

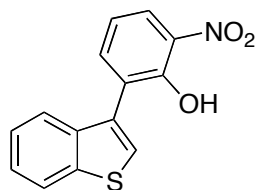

As described in general procedure **C**, benzo[*b*]thiophene (67 mg, 0.5 mmol), 2-nitrophenol (**2j**) (104 mg, 0.75 mmol), trifluoroacetic anhydride (105  $\mu\text{l}$ , 0.75 mmol) and *p*TsOH (172 mg, 1 mmol), gave **4j** (102 mg, 0.375 mmol, 75 %) as a yellow solid; **m.p.**: 122-123  $^{\circ}\text{C}$ ;  $\delta_{\text{H}}$  (400 MHz,  $\text{CDCl}_3$ ) 7.11 - 7.44 (1 H, dd,  $J = 8.5, 7.4$  Hz, *ArCH*), 7.36 (2 H, m, *ArCH*), 7.57 (1H, s, *ArCH*), 7.62 - 7.65 (1 H, m, *ArCH*), 7.75 (1 H, dd,  $J = 7.4, 1.6$  Hz, *ArCH*), 7.91 - 7.97 (1 H, m, *ArCH*), 8.21 (1 H, dd,  $J = 8.5, 1.6$  Hz, *ArCH*), 11.07 (1 H, s, *OH*);  $\delta_{\text{C}}$  (101 MHz,  $\text{CDCl}_3$ ) 119.9 (*ArCH*), 123.0 (*ArCH*), 123.1 (*ArCH*), 124.5 (*ArCH*), 124.7 (*ArCH*), 124.8 (*ArCH*), 126.5 (*ArCH*), 127.5 (*ArC*), 131.2 (*ArC*), 134.4 (*ArC*), 138.1 (*ArC*), 139.1 (*ArCH*), 140.0 (*ArC*), 153.4 (*ArC*);  $\nu_{\text{max}}$  (neat)/ $\text{cm}^{-1}$  733, 755, 1217, 1276, 1442, 1540, 1603, 3125; **HRMS** (ESI): Calcd. for  $\text{C}_{14}\text{H}_8\text{O}_3\text{NS}$  ( $\text{M}-\text{H}$ ) $^+$ , 270.0230; found 270.0221.

### 3-(Benzo[*b*]thiophen-3-yl)-*N,N*-diethyl-2-hydroxybenzamide **4k**

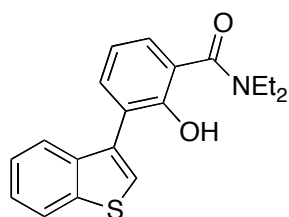

As described in general procedure **C**, benzo[*b*]thiophene (67 mg, 0.5 mmol), *N,N*-diethyl-2-hydroxybenzamide (**2k**) (145 mg, 0.75 mmol), trifluoroacetic anhydride (105  $\mu$ l, 0.75 mmol) and *p*TsOH (172 mg, 1 mmol), gave **4k** (90 mg, 0.275 mmol, 55 %) as a yellow oil;  $\delta_{\text{H}}$  (400 MHz,  $\text{CDCl}_3$ ) 1.31 (6 H, t,  $J = 7.1$  Hz,  $\text{CH}_3$ ), 3.57 (4 H, q,  $J = 7.1$  Hz,  $\text{CH}_2$ ), 6.98 (1 H, t,  $J = 7.6$  Hz, ArCH), 7.33 - 7.39 (3H, m, ArCH), 7.46 (1 H, dd,  $J = 7.6, 1.6$  Hz, ArCH), 7.52 (1 H, s, ArCH), 7.70 - 7.74 (1 H, m, ArCH), 7.89 - 7.94 (1 H, m, ArCH), 9.60 (1 H, s, OH);  $\delta_{\text{C}}$  (101 MHz,  $\text{CDCl}_3$ ) 13.6 ( $\text{CH}_3$ ), 42.3 ( $\text{CH}_2$ ), 118.6 (ArCH), 119.4 (ArC), 122.8 (ArCH), 123.5 (ArCH), 124.2 (ArCH), 124.4 (ArC), 124.9 (ArCH), 125.4 (ArCH), 127.2 (ArCH), 133.2 (ArC), 133.7 (ArCH), 138.5 (ArC), 140.2 (ArC), 155.9 (ArC), 171.4 (C=O);  $\nu_{\text{max}}$  (neat)/ $\text{cm}^{-1}$  729, 760, 908, 1117, 1250, 1345, 1431, 1573, 1599, 2973; **HRMS** (ESI+): Calcd. for  $\text{C}_{19}\text{H}_{20}\text{O}_2\text{NS}$  (M+H) $^+$ , 326.1209; found 326.1201.

### 2-(5-Bromobenzo[*b*]thiophen-3-yl)-5-chlorophenol **4l**

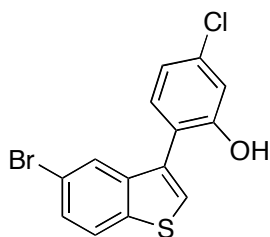

As described in general procedure **B**, 5-bromo-benzo[*b*]thiophene *S*-oxide (**1a**) (46 mg, 0.2 mmol), 3-chlorophenol (**2l**) (38 mg, 0.3 mmol), trifluoroacetic anhydride (41  $\mu$ l, 0.3 mmol) and  $\text{I}_2$  (102 mg, 0.4 mmol), gave **4l** (45 mg, 0.134 mmol, 67%) as a white solid; **m.p.**: 94-96  $^{\circ}\text{C}$ ;  $\delta_{\text{H}}$  (500 MHz,  $\text{CDCl}_3$ ) 5.13 (1 H, s, OH), 7.04 (1 H, dd,  $J = 8.1, 2.1$  Hz, ArCH), 7.08 (1 H, d,  $J = 2.1$  Hz, ArCH), 7.22 (1 H, d,  $J = 8.1$  Hz, ArCH), 7.51 - 7.54 (2 H, m, ArCH), 7.73 (1 H, d,  $J = 1.8$  Hz, ArCH), 7.79 (1 H, d,  $J = 8.7$  Hz, ArCH);  $\delta_{\text{C}}$  (126 MHz,  $\text{CDCl}_3$ ) 116.6 (ArCH), 119.3 (ArC), 119.7 (ArC), 121.3 (ArCH), 124.4 (ArCH), 125.8 (ArCH), 127.7 (ArCH), 128.4 (ArCH), 130.8 (ArC), 131.7 (ArCH), 135.4 (ArC), 139.3 (ArC), 139.8 (ArC), 154.1 (ArC);  $\nu_{\text{max}}$  (neat)/ $\text{cm}^{-1}$  752, 785, 892, 1065, 1173, 1211, 1298, 1477, 1567, 3089, 3513; **HRMS** (ESI): Calcd. for  $\text{C}_{14}\text{H}_7\text{OBrClS}$  (M-H) $^+$ , 336.9084; found 336.9091.

**(8*R*,9*S*,13*S*,14*S*)-2-(5-Bromobenzo[*b*]thiophen-3-yl)-3-hydroxy-13-methyl-**

**7,8,9,11,12,13,15,16-octahydro-6*H*-cyclopenta[*a*]phenanthren-17(14*H*)-one 4m**

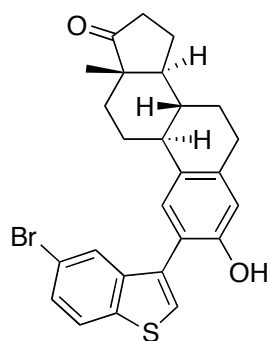

As described in general procedure **B**, 5-bromo-benzo[*b*]thiophene *S*-oxide (**1a**) (23 mg, 0.1 mmol), estrone (**2m**) (60 mg, 0.125 mmol), trifluoroacetic anhydride (20  $\mu$ l, 0.15 mmol) and  $I_2$  (51 mg, 0.2 mmol), gave **4m** (33 mg, 0.069 mmol, 69%) as a white solid; **m.p.**: 136-138  $^{\circ}C$ ;  $\delta_H$  (400 MHz,  $CDCl_3$ ) 0.93 (3 H, s,  $CH_3$ ), 1.38 - 1.73 (6 H, m), 1.90 - 1.96 (1 H, m), 2.02 - 2.21 (3 H, m), 2.30 - 2.38 (2 H, m), 2.52 (1 H, dd,  $J = 18.6, 8.7$  Hz), 2.96 (2 H, dd,  $J = 9.1, 4.2$  Hz), 4.94 (1 H, s, OH), 6.80 (1 H, s, ArCH), 7.19 (1 H, d,  $J = 1.0$  Hz, ArCH), 7.47 (1 H, s, ArCH), 7.50 (1 H, dd,  $J = 8.6, 1.9$  Hz, ArCH), 7.80 - 7.76 (2H, m, ArCH);  $\delta_C$  (101 MHz,  $CDCl_3$ ) 14.0 ( $CH_3$ ), 21.7 ( $CH_2$ ), 26.1 ( $CH_2$ ), 26.6 ( $CH_2$ ), 29.5 ( $CH_2$ ), 31.6 ( $CH_2$ ), 36.0 ( $CH_2$ ), 38.4 (CH), 44.1 (CH), 48.1 (C), 50.5 (CH), 116.0 (ArCH), 118.8 (ArC), 119.1 (ArC), 124.3 (ArCH), 126.1 (ArCH), 127.1 (ArCH), 128.0 (ArCH), 128.1 (ArCH), 132.5 (ArC), 138.9 (ArC), 139.2 (ArC), 140.2 (ArC), 151.3 (ArC), 221.2 (ArC);  $\nu_{max}$  (neat)/ $cm^{-1}$  749, 871, 1063, 1214, 1404, 1721, 2927, 3346; **HRMS** (ESI): Calcd. for  $C_{26}H_{24}O_2BrS$  (M-H) $^+$ , 479.0686; found 579.0675.

**2-(6-Bromobenzo[*b*]thiophen-3-yl)phenol 4n**

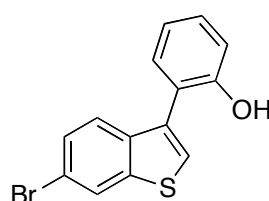

As described in general procedure **C**, 6-bromo-benzo[*b*]thiophene (106 mg, 0.5 mmol), phenol (**2f**) (71 mg, 0.75 mmol), trifluoroacetic anhydride (105  $\mu$ l, 0.75 mmol) and *p*TsOH (172 mg, 1 mmol), gave **4n** (109 mg, 0.36 mmol, 72 %) as a colourless oil;  $\delta_H$  (400 MHz,  $CDCl_3$ ) 5.04 (1 H, s, OH), 7.01 - 7.08 (2 H, m, ArCH), 7.30 (1 H, dd,  $J = 7.5, 1.7$  Hz, ArCH), 7.34 - 7.37 (1 H, m, ArCH), 7.46 - 7.51 (3 H, m, ArCH), 8.06 - 8.10 (1H, m, ArCH);  $\delta_C$  (101 MHz,  $CDCl_3$ ) 116.1 (ArCH), 119.2 (ArC), 120.9 (ArCH), 121.2 (ArC), 124.5 (ArCH), 125.5 (ArCH), 126.0 (ArCH), 128.2 (ArCH), 130.1 (ArCH), 131.0 (ArCH), 132.3 (ArC), 137.1 (ArC), 142.1 (ArC), 153.4 (ArC);  $\nu_{max}$  (neat)/ $cm^{-1}$  746, 887, 1069, 1206, 1286, 1470, 1560, 3080, 3520; **HRMS** (ESI): Calcd. for  $C_{14}H_8OBrS$  (M-H) $^+$ , 302.9474; found 302.9477.

### 2-(5-Bromobenzo[*b*]thiophen-3-yl)phenol **4o**

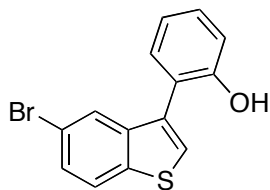

As described in general procedure **B**, 5-bromo-benzo[*b*]thiophene *S*-oxide (46 mg, 0.2 mmol), phenol (**2f**) (29 mg, 0.3 mmol), trifluoroacetic anhydride (41  $\mu$ l, 0.3 mmol) and *p*TsOH (69 mg, 0.4 mmol), gave **4o** (44 mg, 0.145 mmol, 72 %) as a colourless oil;  $\delta_{\text{H}}$  (400 MHz,  $\text{CDCl}_3$ ) 5.03 (1 H, s, OH), 7.04 - 7.10 (2 H, m, ArCH), 7.29 - 7.33 (1 H, m, ArCH), 7.35 - 7.40 (1 H, m, ArCH), 7.50 - 7.56 (2 H, m, ArCH), 7.78 (1 H, d,  $J = 1.5$  Hz, ArCH), 7.80 (1 H, d,  $J = 8.5$  Hz, ArCH);  $\delta_{\text{C}}$  (101 MHz,  $\text{CDCl}_3$ ) 116.1 (ArCH), 119.0 (ArCBr), 120.9 (ArCH), 121.0 (ArC), 124.2 (ArCH), 125.9 (ArCH), 127.1 (ArCH), 128.1 (ArCH), 130.0 (ArCH), 130.8 (ArCH), 131.8 (ArC), 139.1 (ArC), 140.0 (ArC), 153.3 (ArCOH);  $\nu_{\text{max}}$  (neat)/ $\text{cm}^{-1}$  753, 789, 906, 1064, 1177, 1211, 1420, 1478, 1578, 2849, 2919, 3087, 3520; **HRMS** (ESI): Calcd. for  $\text{C}_{14}\text{H}_8\text{OSBr}$  (M-H)<sup>+</sup>, 302.9484; found 302.9484.

### 2-(5-Chlorobenzo[*b*]thiophen-3-yl)phenol **4p**

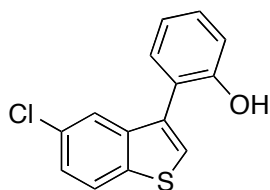

As described in general procedure **C**, 5-chloro-benzo[*b*]thiophene *S*-oxide (85 mg, 0.5 mmol), phenol (**2f**) (73 mg, 0.75 mmol), trifluoroacetic anhydride (105  $\mu$ l, 0.75 mmol) and *p*TsOH (172 mg, 1 mmol), gave **4p** (77 mg, 0.3 mmol, 60 %) as a colourless oil;  $\delta_{\text{H}}$  (400 MHz,  $\text{CDCl}_3$ ) 5.07 (1 H, s, OH), 7.04 - 7.10 (2 H, m, ArCH), 7.29 - 7.42 (3 H, m, ArCH), 7.56 (1 H, s, ArCH), 7.63 (1 H, d,  $J = 2.0$  Hz, ArCH), 7.85 (1 H, d,  $J = 8.5$  Hz, ArCH);  $\delta_{\text{C}}$  (101 MHz,  $\text{CDCl}_3$ ) 115.7 (ArCH), 120.5 (ArCH), 120.7 (ArC), 122.5 (ArCH), 123.5 (ArCH), 125.1 (ArCH), 126.9 (ArCH), 129.6 (ArCH), 130.5 (ArCH), 130.8 (ArC), 131.5 (ArC), 138.3 (ArC), 139.2 (ArC), 152.9 (ArCOH);  $\nu_{\text{max}}$  (neat)/ $\text{cm}^{-1}$  753, 832, 906, 1075, 1172, 1212, 1277, 1423, 1479, 1579, 3087, 3525; **HRMS** (ESI): Calcd. for  $\text{C}_{14}\text{H}_{10}\text{OSCl}$  (M+H)<sup>+</sup>, 261.0135; found 261.0134.

### 2-(5-Nitrobenzo[*b*]thiophen-3-yl)phenol **4q**

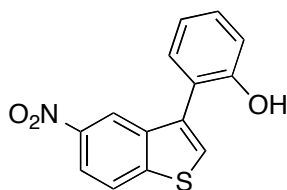

As described in general procedure **B**, 5-nitro-benzo[*b*]thiophene *S*-oxide (**1b**) (39 mg, 0.2 mmol), phenol (**2f**) (28 mg, 0.3 mmol), trifluoroacetic anhydride (41  $\mu$ l, 0.3 mmol) and *p*TsOH (69 mg, 0.4 mmol), gave **4q** (50 mg, 0.186 mmol, 93%) as a yellow solid; **m.p.**: 202-204  $^{\circ}\text{C}$ ;  $\delta_{\text{H}}$  (500 MHz,  $\text{CDCl}_3$ ) 5.00 (s, 1H, OH), 7.03 - 7.14 (2 H, m, ArCH), 7.31 - 7.42 (2 H, m, ArCH), 7.69 (1 H, s, ArCH), 8.04 (1 H, d,  $J = 8.8$  Hz, ArCH), 8.23 - 8.29 (1 H, m, ArCH), 8.54 (1 H, d,  $J = 2.3$  Hz, ArCH);  $\delta_{\text{C}}$  (126 MHz,  $\text{CDCl}_3$ ) 116.5 (ArCH), 119.3 (ArCH),

119.5 (ArCH), 120.6 (ArC), 121.4 (ArCH), 123.6 (ArCH), 128.6 (ArCH), 130.5 (ArCH), 131.2 (ArCH), 134.3 (ArC), 138.6 (ArC), 145.9 (ArC), 146.3 (ArC), 153.2 (ArC);  $\nu_{\max}$  (neat)/ $\text{cm}^{-1}$  738, 754, 1052, 1097, 1184, 1284, 1325, 1451, 1484, 1529, 3093, 3427; **HRMS** (APCI): Calcd. for  $\text{C}_{14}\text{H}_{10}\text{O}_3\text{NS}$  ( $\text{M}+\text{H}$ )<sup>+</sup>, 272.0376; found 272.0373.

### 2-(4-Bromobenzo[*b*]thiophen-3-yl)phenol **4r**

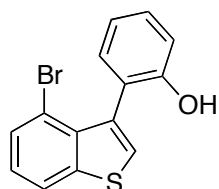

As described in general procedure **C**, 4-bromo-benzo[*b*]thiophene (106 mg, 0.5 mmol), phenol (**2f**) (71 mg, 0.75 mmol), trifluoroacetic anhydride (105  $\mu\text{l}$ , 0.75 mmol) and  $\text{I}_2$  (500 mg, 1 mmol), gave **4r** (104 mg, 0.35 mmol, 70 %) as a white solid; **m.p.**: 120-122 °C;  $\delta_{\text{H}}$  (400 MHz,  $\text{CDCl}_3$ ) 4.75 (s, 1H, OH), 6.95 - 7.01 (2 H, m, ArCH), 7.21 - 7.26 (2 H, m, ArCH), 7.35 (1 H, td,  $J = 8.0, 1.7$  Hz, ArCH), 7.51 (1 H, s, ArCH), 7.58 (1 H, dd,  $J = 7.6, 1.0$  Hz, ArCH), 7.90 (1 H, dd,  $J = 8.0, 1.0$  Hz, ArCH);  $\delta_{\text{C}}$  (101 MHz,  $\text{CDCl}_3$ ) 115.2 (ArCH), 117.5 (ArC), 120.2 (ArCH), 122.5 (ArCH), 123.7 (ArC), 125.8 (ArCH), 129.1 (ArCH), 130.1 (ArCH), 130.3 (ArCH), 131.9 (ArCH), 132.8 (ArC), 135.53 (ArC), 142.6 (ArC), 154.5 (ArC);  $\nu_{\max}$  (neat)/ $\text{cm}^{-1}$  753, 792, 844, 1074, 1100, 1199, 1227, 1322, 1438, 1579, 3260; **HRMS** (ESI): Calcd. for  $\text{C}_{14}\text{H}_8\text{OBrS}$  ( $\text{M}-\text{H}$ )<sup>+</sup>, 302.9485; found 302.9478.

### 2-(7-Bromobenzo[*b*]thiophen-3-yl)phenol **4s**

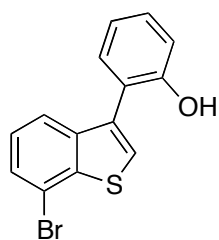

As described in general procedure **C**, 7-bromo-benzo[*b*]thiophene *S*-oxide (106 mg, 0.5 mmol), phenol (**2f**) (71 mg, 0.75 mmol), trifluoroacetic anhydride (105  $\mu\text{l}$ , 0.75 mmol) and *p*TsOH (172 mg, 1 mmol), gave **4s** (84 mg, 0.275 mmol, 55%) as a colourless oil;  $\delta_{\text{H}}$  (500 MHz,  $\text{CDCl}_3$ ) 5.04 (1 H, s, OH), 7.01 - 7.08 (2 H, m, ArCH), 7.26 - 7.33 (2 H, m, ArCH), 7.35 - 7.37 (1 H, m, ArCH), 7.56 - 7.63 (3 H, m, ArCH);  $\delta_{\text{C}}$  (126 MHz,  $\text{CDCl}_3$ ) 116.1 (ArCH), 116.5 (ArC), 120.9 (ArCH), 121.7 (ArC), 122.3 (ArCH), 126.2 (ArCH), 126.6 (ArCH), 127.9 (ArCH), 130.1 (ArCH), 131.0 (ArCH), 133.5 (ArC), 139.4 (ArC), 142.4 (ArC), 153.3 (ArC);  $\nu_{\max}$  (neat)/ $\text{cm}^{-1}$  722, 752, 782, 1080, 1176, 1213, 1343, 1383, 1475, 1575, 2923, 3064, 3525; **HRMS** (APCI): Calcd. for  $\text{C}_{14}\text{H}_{10}\text{OBrS}$  ( $\text{M}+\text{H}$ )<sup>+</sup>, 304.9630; found 304.9629.

### 6H-Benzo[4,5]thieno[2,3-c]chromen-6-one<sup>2</sup> **4t**

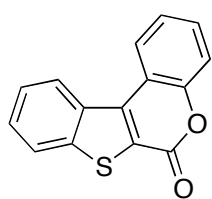

As described in general procedure **B**, methyl benzo[*b*]thiophene-2-carboxylate 1-oxide (24.8 mg, 0.12 mmol), phenol (**2f**) (16.9 mg, 0.18 mmol), trifluoroacetic anhydride (105  $\mu$ l, 0.75 mmol) and I<sub>2</sub> (61 mg, 0.24 mmol), gave **4t** (22.1 mg, 8.2 mmol, 68%) as a white solid; **m.p.**: 199-200 °C;  $\delta_{\text{H}}$  (500 MHz, CDCl<sub>3</sub>) 7.44-7.47 (1 H, m, ArCH), 7.55 (2 H, m, ArCH), 8.03 (1 H, m, ArCH), 7.64 (2 H, m, ArCH), 8.50 (1 H, m, ArCH), 8.64 (1 H, m, ArCH);  $\delta_{\text{C}}$  (126 MHz, CDCl<sub>3</sub>) 118.1 (ArCH), 118.4 (ArC), 123.5 (ArCH), 124.0 (ArCH), 124.8 (ArCH), 125.7 (ArCH), 126.1 (ArCH), 126.2 (ArC), 128.4 (ArCH), 130.0 (ArCH), 135.0 (ArC), 138.6 (ArC), 143.7 (ArC), 152.7 (ArC), 158.0 (C=O);  $\nu_{\text{max}}$  (neat)/cm<sup>-1</sup> 674, 736, 943, 1028, 1161, 1272, 1374, 1441, 1590, 1718, 2923, 3058. **HRMS** (HESI): Calcd. for C<sub>15</sub>H<sub>9</sub>O<sub>2</sub>S (M+H)<sup>+</sup>, 253.0318; found 253.0308.

### 2-(2-Phenylbenzo[*b*]thiophen-3-yl)phenol **4u**

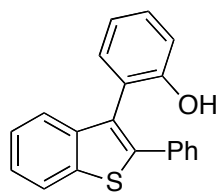

As described in general procedure **B**, 2-phenylbenzo[*b*]thiophene 1-oxide (25.7 mg, 0.11 mmol), phenol (**2f**) (15.5 mg, 0.17 mmol), trifluoroacetic anhydride (105  $\mu$ l, 0.75 mmol) and *p*TsOH (38 mg, 0.22 mmol), gave **4u** (10.8 mg, 3.6 mmol, 40%) as a colourless oil;  $\delta_{\text{H}}$  (500 MHz, CDCl<sub>3</sub>) 4.91 (1 H, s, OH), 6.97-7.03 (2 H, m, ArCH), 7.20-7.23 (1 H, m, ArCH), 7.28 (3 H, m, ArCH), 7.37 (5 H, m, ArCH), 7.45 (1 H, d, *J* = 7.8 Hz, ArCH), 7.91 (1 H, d, *J* = 7.8 Hz, ArCH);  $\delta_{\text{C}}$  (126 MHz, CDCl<sub>3</sub>) 115.8 (ArCH), 120.8 (ArCH), 121.3 (ArC), 122.1 (ArCH), 123.2 (ArCH), 124.8 (ArCH), 125.0 (ArCH), 126.9 (ArC), 128.3 (ArCH), 128.5 (ArCH), 128.6 (ArCH), 129.8 (ArCH), 131.3 (ArCH), 133.3 (ArC), 139.0 (ArC), 140.5 (ArC), 141.9 (ArC), 153.4 (ArC);  $\nu_{\text{max}}$  (neat)/cm<sup>-1</sup> 3524, 3057, 693, 732, 751, 1068, 1192, 1286, 1331, 1492, 1578, 2924; **HRMS** (HESI): Calcd. for C<sub>20</sub>H<sub>13</sub>OS (M-H)<sup>+</sup>, 301.0682; found 301.0682.

### General Procedure D. Propargylation/Allylation of benzo[*b*]thiophene *S*-oxides

To an oven dried tube under nitrogen was added the benzo[*b*]thiophene *S*-oxide (**1**) (0.2 mmol), propargyl (**7**) or allyl silane (**6**) (0.3 mmol) and MeCN (2 mL). The solution was cooled to 0 °C, and TFAA was added (0.4 mmol). The cooling bath was then removed and the mixture stirred at ambient temperature overnight. Saturated NaHCO<sub>3</sub> (aq) (3 mL) was added and the aqueous layer was extracted with EtOAc (3  $\times$  5 mL). The combined organic extracts dried with MgSO<sub>4</sub>. The solvent was removed *in vacuo* before purification by column chromatography (hexane) to give the product.

### General Procedure E. Propargylation of Benzo[b]thiophenes *-in situ* oxidation and coupling.

To an oven dried vial under nitrogen, was added the benzo[b]thiophene (0.5 mmol) CH<sub>2</sub>Cl<sub>2</sub> (1 mL) and TFA (1 mL). To this mixture was added H<sub>2</sub>O<sub>2</sub> (30% aq, 0.5 mmol) at room temperature. The reaction was monitored by TLC (5% EtOAc in CHCl<sub>3</sub>) and more H<sub>2</sub>O<sub>2</sub> was added until complete consumption of the starting material was observed. The reaction was then quenched with NaHCO<sub>3</sub> at 0 °C and the aqueous layer extracted with CH<sub>2</sub>Cl<sub>2</sub> (3 × 1 mL). The combined organic layers were dried with MgSO<sub>4</sub> before MeCN was added (10 mL). CH<sub>2</sub>Cl<sub>2</sub> was removed under vacuum with no heating to give a solution of benzo[b]thiophene *S*-oxide (**1**) in MeCN to which was added the silane (**6** or **7**) (0.75 mmol) and TFAA (1 mmol) at 0 °C. The cooling bath was then removed and the mixture stirred at ambient temperature overnight. Saturated NaHCO<sub>3</sub> (aq) (3 mL) was added and the aqueous layer was extracted with EtOAc (3 × 5 mL). The combined organic extracts dried with MgSO<sub>4</sub>. The solvent was removed *in vacuo* before purification by column chromatography (hexane) to give the product.

### C3 allylation/propargylation. Characterization data.

#### 3-Allyl-5-bromobenzo[b]thiophene **6a**

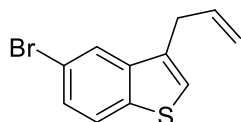

As described in general procedure **D**, 5-bromo-benzo[b]thiophene *S*-oxide (**1a**) (46 mg, 0.2 mmol), trimethyl(2-methylallyl)silane (**5a**) (47 μL, 0.3 mmol) and trifluoroacetic anhydride (56 μL, 0.4 mmol), gave **6a** (40 mg, 0.16 mmol, 79%) as a colourless oil;  $\delta_{\text{H}}$  (400 MHz, CDCl<sub>3</sub>) 3.57 (2 H, dq,  $J = 6.5$ , 1.3 Hz, CH<sub>2</sub>), 5.15 - 5.22 (2 H, m, CH=CH<sub>2</sub>), 6.00 - 6.11 (1 H, m, CH=CH<sub>2</sub>), 7.17 (1 H, s, ArCH), 7.45 (1 H, dd,  $J = 8.5$ , 1.8 Hz, ArCH), 7.71 (1 H, d,  $J = 8.5$  Hz, ArCH), 7.89 (1 H, d,  $J = 2.0$  Hz, ArCH);  $\delta_{\text{C}}$  (101 MHz, CDCl<sub>3</sub>) 32.8 (CH<sub>2</sub>), 117.0 (CH=CH<sub>2</sub>), 118.1 (ArCBr), 123.9 (ArCH), 124.1 (ArCH), 124.7 (ArCH), 127.2 (ArCH), 134.0 (ArC), 135.0 (CH=CH<sub>2</sub>), 139.1 (ArC), 140.5 (ArC);  $\nu_{\text{max}}$  (neat)/cm<sup>-1</sup> 730, 77, 815, 992, 1062, 1149, 1247, 1418, 1429, 1579, 1638; HRMS (EI): Calcd. for C<sub>11</sub>H<sub>9</sub>SBr (M)<sup>+</sup>, 251.9603; found 251.9611.



### 5-Bromo-3-(2-methylallyl)benzo[b]thiophene **6b**

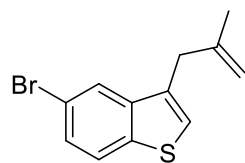

As described in general procedure **D**, 5-bromo-benzo[b]thiophene *S*-oxide (**1a**) (46 mg, 0.2 mmol), trimethyl(2-methylallyl)silane (**5b**) (52  $\mu\text{L}$ , 0.3 mmol) and trifluoroacetic anhydride (56  $\mu\text{L}$ , 0.4 mmol), gave **6b** (47 mg, 0.17 mmol, 88%) as a colourless oil;  $\delta_{\text{H}}$  (400 MHz,  $\text{CDCl}_3$ ) 1.77 (3 H, s,  $\text{CH}_3$ ), 3.53 (2 H, s,  $\text{CH}_2$ ), 4.78 (1 H, s,  $\text{C}=\text{CH}_2$ ), 4.91 (1 H, s,  $\text{C}=\text{CH}_2$ ), 7.18 (1 H, s, *ArCH*), 7.44 (1 H, dd,  $J = 8.5, 1.8$  Hz, *ArCH*), 7.71 (1 H, d,  $J = 8.5$  Hz, *ArCH*), 7.89 (1 H, d,  $J = 1.8$  Hz, *ArCH*);  $\delta_{\text{C}}$  (101 MHz,  $\text{CDCl}_3$ ) 22.3 ( $\text{CH}_3$ ), 37.1 ( $\text{CH}_2$ ), 112.7 ( $\text{C}=\text{CH}_2$ ), 118.0 (*ArCBr*), 124.1 (*ArCH*), 124.6 (*ArCH*), 124.9 (*ArCH*), 127.1 (*ArCH*), 133.5 (*ArC*), 139.1 (*ArC*), 140.8 (*ArC*), 142.9 ( $\text{C}=\text{CH}_2$ );  $\nu_{\text{max}}$  (neat)/ $\text{cm}^{-1}$  773, 866, 892, 1062, 1248, 1373, 1417, 1578, 1650, 2903, 2969; **HRMS** (EI): Calcd. for  $\text{C}_{12}\text{H}_{11}\text{SBr}$  ( $\text{M}^+$ ), 265.9759; found 265.9770.

### 5-Bromo-3-[2-(chloromethyl)allyl]benzo[b]thiophene **6c**

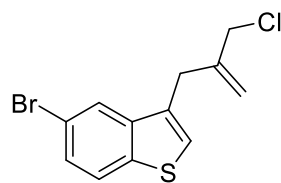

As described in general procedure **D**, 5-bromo-benzo[b]thiophene *S*-oxide (**1a**) (46 mg, 0.2 mmol), [2-(chloromethyl)allyl]trimethylsilane (**5c**) (54  $\mu\text{L}$ , 0.3 mmol) and trifluoroacetic anhydride (56  $\mu\text{L}$ , 0.4 mmol), gave **6c** (52 mg, 0.17 mmol, 85%) as a colourless oil;  $\delta_{\text{H}}$  (400 MHz,  $\text{CDCl}_3$ ) 3.51 (2 H, s,  $\text{CH}_2\text{Cl}$ ), 3.82 (2 H, d,  $J = 0.8$  Hz,  $\text{CH}_2$ ), 4.79 (1 H, q,  $J = 1.3$  Hz,  $\text{C}=\text{CH}_2$ ), 5.05 (1 H, d,  $J = 0.8$  Hz,  $\text{C}=\text{CH}_2$ ), 7.04 (1 H, s, *ArCH*), 7.23 (1 H, dd,  $J = 8.5, 1.8$  Hz, *ArCH*), 7.50 (1 H, d,  $J = 8.5$  Hz, *ArCH*), 7.65 (1 H, d,  $J = 2.0$  Hz, *ArCH*);  $\delta_{\text{C}}$  (101 MHz,  $\text{CDCl}_3$ ) 32.4 ( $\text{CH}_2$ ), 47.7 ( $\text{CH}_2\text{Cl}$ ), 117.0 ( $\text{C}=\text{CH}_2$ ), 118.2 (*ArCBr*), 124.1 (*ArCH*), 124.8 (*ArCH*), 125.5 (*ArCH*), 127.4 (*ArCH*), 132.0 (*ArC*), 139.2 (*ArC*), 140.4 (*ArC*), 142.5 ( $\text{C}=\text{CH}_2$ );  $\nu_{\text{max}}$  (neat)/ $\text{cm}^{-1}$  687, 730, 778, 905, 1062, 1149, 1257, 1418, 1579, 1645; **HRMS** (EI): Calcd. for  $\text{C}_{12}\text{H}_{10}\text{SBr}$  ( $\text{M}^+$ ), 299.9370; found 299.9374.

### 2-[(5-Bromobenzo[b]thiophen-3-yl)methyl]allyl acetate **6d**

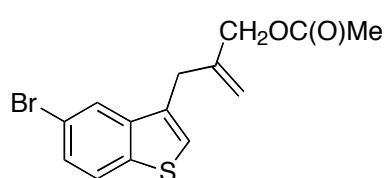

As described in general procedure **D**, 5-bromo-benzo[b]thiophene *S*-oxide (**1a**) (46 mg, 0.2 mmol), 2-((trimethylsilyl)methyl)allyl acetate (56 mg, 0.3 mmol) and trifluoroacetic anhydride (56  $\mu\text{L}$ , 0.4 mmol), gave **6d** (50 mg, 0.17 mmol, 80%) as a colourless oil;  $\delta_{\text{H}}$  (400 MHz,  $\text{CDCl}_3$ ) 2.10 (3 H, s,  $\text{CH}_3$ ), 3.61 (2 H, s,  $\text{CH}_2$ ), 4.57 (2 H, s,  $\text{CH}_2$ ), 5.00 (1 H, s,  $\text{C}=\text{CH}_2$ ), 5.21 (1 H, s,  $\text{C}=\text{CH}_2$ ), 7.22 (1 H, s, *ArCH*), 7.45 (1 H, dd,  $J = 8.5, 1.8$  Hz, *ArCH*), 7.71 (1 H, d,  $J = 8.5$  Hz, *ArCH*), 7.86 (1 H, d,  $J = 1.8$

Hz, ArCH);  $\delta_{\text{C}}$  (101 MHz,  $\text{CDCl}_3$ ) 20.9 ( $\text{CH}_3$ ), 32.6 ( $\text{CH}_2$ ), 66.5 ( $\text{CH}_2$ ), 115.5 ( $\text{C}=\text{CH}_2$ ), 118.2 (ArCBr), 124.1 (ArCH), 124.8 (ArCH), 125.2 (ArCH), 127.3 (ArCH), 132.3 (ArC), 139.1 (ArC), 140.5 (ArC), 141.1 ( $\text{C}=\text{CH}_2$ ), 170.6 ( $\text{C}=\text{O}$ );  $\nu_{\text{max}}$  (neat)/ $\text{cm}^{-1}$  723, 778, 799, 867, 959, 1025, 1040, 1061, 1223, 1371, 1418, 1655, 1734, 2931; **HRMS** (APCI): Calcd. for  $\text{C}_{14}\text{H}_{14}\text{O}_2\text{BrS}$  (M+H), 324.9892; found 324.9891.

### Ethyl 2-((5-bromobenzo[b]thiophen-3-yl)methyl)acrylate **6e**

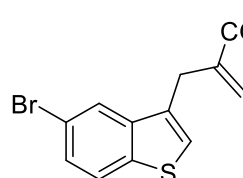

As described in general procedure **D**, 5-bromo-benzo[b]thiophene *S*-oxide (**1a**) (46 mg, 0.2 mmol), ethyl 2-((trimethylsilyl)methyl)acrylate (56 mg, 0.3 mmol) and trifluoroacetic anhydride (56  $\mu\text{L}$ , 0.4 mmol), gave **6e** (50 mg, 0.16 mmol, 80%) as a colourless oil;  $\delta_{\text{H}}$  (400 MHz,  $\text{CDCl}_3$ ) 1.30 (3 H, t,  $J = 7.0$  Hz,  $\text{CH}_3$ ), 3.83 (2 H, d,  $J = 0.5$  Hz,  $\text{CH}_2$ ), 4.24 (2 H, q,  $J = 7.2$  Hz,  $\text{CH}_2$ ), 5.44 (1 H, d,  $J = 1.2$  Hz,  $\text{C}=\text{CH}_2$ ), 6.28 (1 H, d,  $J = 1.2$  Hz,  $\text{C}=\text{CH}_2$ ), 7.20 (1 H, s, ArCH), 7.44 (1 H, dd,  $J = 8.5, 1.8$  Hz, ArCH), 7.71 (1 H, d,  $J = 8.5$  Hz, ArCH), 7.84 (1 H, d,  $J = 1.8$  Hz, ArCH);  $\delta_{\text{C}}$  (101 MHz,  $\text{CDCl}_3$ ) 14.2 ( $\text{CH}_3$ ), 30.6 ( $\text{CH}_2$ ), 61.0 ( $\text{CH}_2$ ), 118.2 (ArCBr), 124.1 (ArCH), 124.7 (ArCH), 125.3 ( $\text{C}=\text{CH}_2$ ), 126.4 (ArCH), 127.3 (ArCH), 132.7 ( $\text{C}=\text{CH}_2$ ), 138.2 (ArC), 139.1 (ArC), 140.3 (ArC), 166.7 ( $\text{C}=\text{O}$ );  $\nu_{\text{max}}$  (neat)/ $\text{cm}^{-1}$  702, 749, 781, 818, 950, 1026, 1092, 1134, 1172, 1199, 1249, 1298, 1418, 1579, 1709, 2978; **HRMS** (APCI): Calcd. for  $\text{C}_{14}\text{H}_{14}\text{O}_2\text{BrS}$  (M+H), 324.9892; found 324.9890.

### 5-Bromo-3-(2-bromoallyl)benzo[b]thiophene **6f**

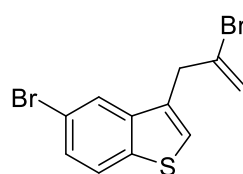

As described in general procedure **D**, 5-bromo-benzo[b]thiophene *S*-oxide (**1a**) (46 mg, 0.2 mmol), trimethyl(2-bromoallyl)silane (57  $\mu\text{L}$ , 0.3 mmol) and trifluoroacetic anhydride (56  $\mu\text{L}$ , 0.4 mmol), gave **6f** (53 mg, 0.16 mmol, 80%) as a colourless oil;  $\delta_{\text{H}}$  (400 MHz,  $\text{CDCl}_3$ ) 3.95 (2 H, s,  $\text{CH}_2$ ), 5.57 - 5.61 (2 H, m,  $\text{C}=\text{CH}_2$ ), 7.33 (1 H, s, ArCH), 7.46 (1 H, dd,  $J = 8.6, 1.9$  Hz, ArCH), 7.73 (1 H, d,  $J = 8.6$  Hz, ArCH), 7.86 (1 H, d,  $J = 1.8$  Hz, ArCH);  $\delta_{\text{C}}$  (101 MHz,  $\text{CDCl}_3$ ) 40.9 ( $\text{CH}_2$ ), 118.7 (ArCBr), 119.1 ( $\text{C}=\text{CH}_2$ ), 124.5 (ArCH), 124.9 (ArCH), 126.6 (ArCH), 127.8 (ArCH), 130.5 ( $\text{C}=\text{CH}_2$ ), 131.3 (ArC), 139.3 (ArC), 140.4 (ArC);  $\nu_{\text{max}}$  (neat)/ $\text{cm}^{-1}$  692, 719, 816, 917, 1032, 1063, 1172, 1212, 1247, 1341, 1413, 1580, 1634, 1837, 2913, 3084; **HRMS** (APCI): Calcd. for  $\text{C}_{11}\text{H}_9\text{Br}_2\text{S}$  (M)<sup>+</sup>, 329.8708; found 329.8708.

### (E)-5-(5-Bromobenzo[b]thiophen-3-yl)pent-3-en-2-one **6g**

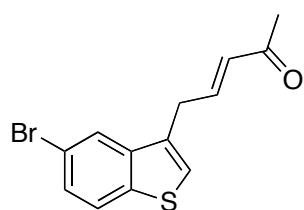

As described in general procedure **D**, 5-bromo-benzo[b]thiophene-*S*-oxide (**1a**) (46 mg, 0.2 mmol), (*E*)-5-(trimethylsilyl)pent-3-en-2-one (**5g**) (47 mg, 0.3 mmol) and trifluoroacetic anhydride (56  $\mu$ L, 0.4 mmol), gave **6g** (34 mg, 0.116 mmol, 58%) as a yellow oil;  $\delta_{\text{H}}$  (400 MHz,  $\text{CDCl}_3$ ) 2.26 (3 H, s,  $\text{CH}_3$ ), 3.72 (2 H, dd,  $J = 6.4, 1.6$ , Hz,  $\text{CH}_2$ ), 6.11 (1 H, dt,  $J = 15.9, 1.6$  Hz,  $\text{CH}=\text{CH}$ ), 6.97 (1 H, dt,  $J = 15.9, 6.4$  Hz,  $\text{CH}=\text{CH}$ ), 7.21 (1 H, s,  $\text{ArCH}$ ), 7.46 (1 H, dd,  $J = 8.5, 1.9$  Hz,  $\text{ArCH}$ ), 7.72 (1 H, dd,  $J = 8.5, 0.5$  Hz,  $\text{ArCH}$ ), 7.79 - 7.81 (1 H, m,  $\text{ArCH}$ );  $\delta_{\text{C}}$  (101 MHz,  $\text{CDCl}_3$ ) 27.4 ( $\text{CH}_3$ ), 31.4 ( $\text{CH}_2$ ), 118.5 ( $\text{ArC}$ ), 124.4 ( $\text{ArCH}$ ), 124.5 ( $\text{ArCH}$ ), 125.3 ( $\text{ArCH}$ ), 127.7 ( $\text{ArCH}$ ), 131.6 ( $\text{ArC}$ ), 132.7 ( $\text{CH}=\text{CH}$ ), 139.2 ( $\text{ArC}$ ), 140.2 ( $\text{ArC}$ ), 143.9 ( $\text{CH}=\text{CH}$ ), 198.3 ( $\text{C}=\text{O}$ );  $\nu_{\text{max}}$  (neat)/ $\text{cm}^{-1}$  793, 979, 1066, 1251, 1359, 1418, 1625, 1669, 2919, 3089; **HRMS** (APCI): Calcd. for  $\text{C}_{13}\text{H}_{12}\text{OSBr}$  ( $\text{M}+1$ )<sup>+</sup>, 294.9787; found 294.9786.

### (E)-Methyl 4-(5-bromobenzo[b]thiophen-3-yl)but-2-enoate **6h**

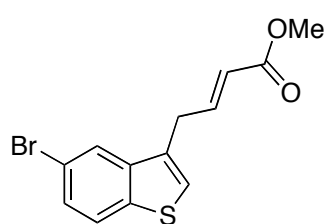

As described in general procedure **D**, 5-bromo-benzo[b]thiophene-*S*-oxide (**1a**) (46 mg, 0.2 mmol), (*E*)-methyl 4-(trimethylsilyl)but-2-enoate (**5h**) (52 mg, 0.3 mmol) and trifluoroacetic anhydride (56  $\mu$ L, 0.4 mmol), gave **6h** (45 mg, 0.146 mmol, 73%) as a yellow oil;  $\delta_{\text{H}}$  (400 MHz,  $\text{CDCl}_3$ ) 3.70 (2 H, dd,  $J = 6.5, 1.7$  Hz,  $\text{CH}_2$ ), 3.73 (3 H, s,  $\text{OCH}_3$ ), 5.86 (1 H, dt,  $J = 15.7, 1.7$  Hz,  $\text{CH}=\text{CH}$ ), 7.16 (1 H, dt,  $J = 15.7, 6.5$  Hz,  $\text{CH}=\text{CH}$ ), 7.20 (1 H, s,  $\text{ArCH}$ ), 7.45 (1 H, dd,  $J = 8.5, 1.8$  Hz,  $\text{ArCH}$ ), 7.71 (1 H, d,  $J = 8.5$  Hz,  $\text{ArCH}$ ), 7.80 (1 H, d,  $J = 1.8$  Hz,  $\text{ArCH}$ );  $\delta_{\text{C}}$  (101 MHz,  $\text{CDCl}_3$ ) 31.2 ( $\text{CH}_2$ ), 51.7 ( $\text{CH}_3$ ), 118.5 ( $\text{ArC}$ ), 123.0 ( $\text{CH}=\text{CH}$ ), 124.4 ( $\text{ArCH}$ ), 124.5 ( $\text{ArCH}$ ), 125.2 ( $\text{ArCH}$ ), 127.7 ( $\text{ArCH}$ ), 131.7 ( $\text{ArC}$ ), 139.2 ( $\text{ArC}$ ), 140.2 ( $\text{ArC}$ ), 145.3 ( $\text{CH}=\text{CH}$ ), 166.8 ( $\text{C}=\text{O}$ );  $\nu_{\text{max}}$  (neat)/ $\text{cm}^{-1}$  785, 982, 1067, 1161, 1208, 1271, 1432, 1655, 1715, 2948, 3092; **HRMS** (APCI): Calcd. for  $\text{C}_{13}\text{H}_{12}\text{OSBr}$  ( $\text{M}+\text{H}$ )<sup>+</sup>, 310.9736; found 310.9734.

### 2-Bromo-3-(hept-2-yn-1-yl)benzo[b]thiophene **8a**

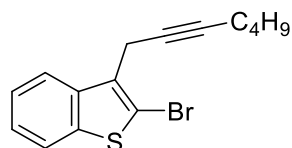

As described in general procedure **D**, 2-bromobenzo[b]thiophene *S*-oxide (**1e**) (45 mg, 0.2 mmol), hept-2-yn-1-yltrimethylsilane (**7a**) (50.0 mg, 0.3 mmol) and trifluoroacetic anhydride (56  $\mu$ L, 0.4 mmol), gave **8a** (60 mg, 0.19 mmol, 98%) as a brown oil;  $\delta_{\text{H}}$  (400 MHz,  $\text{CDCl}_3$ ) 0.89 (3 H, t,  $J = 7.3$  Hz,  $\text{CH}_3$ ), 1.33 - 1.52 (4 H, m,  $2 \times \text{CH}_2$ ), 2.14 (2 H, tt,  $J = 7.0, 2.4$  Hz,  $\text{CH}_2$ ), 3.74 (2 H, t,  $J =$

2.4 Hz,  $CH_2$ ), 7.32 - 7.42 (2 H, m, ArCH), 7.73 (1 H, ddd,  $J = 7.8, 1.4, 0.7$  Hz, ArCH), 7.88 - 7.96 (1 H, m, ArCH);  $\delta_C$  (101 MHz,  $CDCl_3$ ) 13.6 ( $CH_3$ ), 18.2 ( $CH_2$ ), 18.4 ( $CH_2$ ), 21.9 ( $CH_2$ ), 30.9 ( $CH_2$ ), 75.2 (CC), 81.6 (CC), 113.3 (ArCBr), 121.7 (ArCH), 122.2 (ArCH), 124.5 (ArCH), 124.6 (ArCH), 131.2 (ArC), 137.8 (ArC), 139.7 (ArC);  $\nu_{max}$  (neat)/ $cm^{-1}$  764, 824, 1025, 1067, 1149, 1247, 1263, 1347, 1418, 1498, 1662, 1706, 2858, 2928, 2952; **HRMS** (EI): Calcd. for  $C_{15}H_{15}SBr$  ( $M$ )<sup>+</sup>, 306.0072; found 306.0070.

### 3-(Hept-2-yn-1-yl)benzo[b]thiophene-2-carbonitrile **8b**

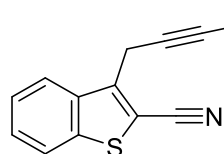

As described in general procedure **D**, 2-carbonitrile-benzo[b]thiophene *S*-oxide (**1f**) (35 mg, 0.2 mmol), hept-2-yn-1-yltrimethylsilane (**7a**) (50.0 mg, 0.3 mmol) and trifluoroacetic anhydride (56  $\mu$ l, 0.4 mmol), gave **8b** (46 mg, 0.18 mmol, 91 %) as a brown oil;  $\delta_H$  (400 MHz,  $CDCl_3$ ) 0.89 (3 H, t,  $J = 7.3$  Hz,  $CH_3$ ), 1.34 - 1.49 (4 H, m, 2 x  $CH_2$ ), 2.16 (2 H, tt,  $J = 7.0, 2.4$  Hz,  $CH_2$ ), 3.93 (2 H, t,  $J = 2.4$  Hz,  $CH_2$ ), 7.44 - 7.62 (2 H, m, ArCH), 7.84 (1 H, dt,  $J = 8.3, 0.8$  Hz, ArCH), 8.09 (1 H, dq,  $J = 7.9, 0.7$  Hz, ArCH);  $\delta_C$  (101 MHz,  $CDCl_3$ ) 12.9 ( $CH_3$ ), 18.4 ( $CH_2$ ), 18.8 ( $CH_2$ ), 21.7 ( $CH_2$ ), 30.6 ( $CH_2$ ), 74.1 (CC), 83.4 (CC), 106.3 (ArCCN), 113.9 (ArCCN), 122.6 (ArCH), 124.2 (ArCH), 125.3 (ArCH), 127.9 (ArCH), 136.5 (ArC), 140.9 (ArC), 143.8 (ArC);  $\nu_{max}$  (neat)/ $cm^{-1}$  730, 755, 853, 1129, 1157, 1173, 1428, 1688, 2216, 2930, 2956; **HRMS** (EI): Calcd. for  $C_{16}H_{16}NS$  ( $M+H$ )<sup>+</sup>, 254.0998; found 254.0993.

### Methyl 3-(hept-2-yn-1-yl)benzo[b]thiophene-2-carboxylate **8c**

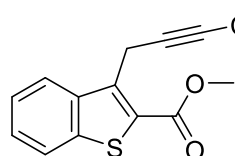

As described in general procedure **D**, 2-methylcarboxylate-benzo[b]thiophene *S*-oxide (**1c**) (41 mg, 0.2 mmol), hept-2-yn-1-yltrimethylsilane (**7a**) (50.0 mg, 0.3 mmol) and trifluoroacetic anhydride (56  $\mu$ l, 0.4 mmol), gave **8c** (42 mg, 0.14 mmol, 72 %) as a yellow oil;  $\delta_H$  (400 MHz,  $CDCl_3$ ) 0.86 (3 H, t,  $J = 7.3$  Hz,  $CH_3$ ), 1.29 - 1.48 (4 H, m, 2 x  $CH_2$ ), 2.12 (2 H, tt,  $J = 7.0, 2.4$  Hz,  $CH_2$ ), 3.95 (3 H, s,  $CH_3$ ), 4.27 (2 H, t,  $J = 2.5$  Hz,  $CH_2$ ), 7.43 - 7.52 (2 H, m, ArCH), 7.85 (1 H, s, ArCH), 8.10 - 8.14 (1 H, m, ArCH);  $\delta_C$  (101 MHz,  $CDCl_3$ ) 13.5 ( $CH_3$ ), 16.9 ( $CH_2$ ), 18.4 ( $CH_2$ ), 21.8 ( $CH_2$ ), 30.8 ( $CH_2$ ), 52.2 ( $CH_3$ ), 76.1 (CC), 81.2 (CC), 122.5 (ArCH), 124.4 (ArCH), 124.4 (ArCH), 127.0 (ArC), 127.2 (ArCH), 139.1 (ArC), 139.7 (ArC), 140.4 (ArC), 163.4 (ArCCO<sub>2</sub>Me);  $\nu_{max}$  (neat)/ $cm^{-1}$  732, 756, 1061, 1104, 1199, 1241, 1327, 1435, 1530, 1676, 1711, 2871, 2931, 2955; **HRMS** (EI): Calcd. for  $C_{17}H_{19}O_2S$  ( $M+H$ )<sup>+</sup>, 287.1098; found 287.1100.

### 3-(Hept-2-yn-1-yl)-2-methylbenzo[b]thiophene **8d**

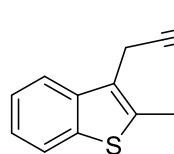

As described in general procedure **D**, 2-methylbenzo[b]thiophene *S*-oxide (**1g**) (32 mg, 0.2 mmol), hept-2-yn-1-yltrimethylsilane (**7a**) (50.0 mg, 0.3 mmol) and trifluoroacetic anhydride (56  $\mu$ l, 0.4 mmol), gave **8d** (35 mg, 0.14 mmol, 72 %) as a yellow oil;  $\delta_{\text{H}}$  (400 MHz,  $\text{CDCl}_3$ ) 0.89 (3 H, t,  $J = 7.3$  Hz,  $\text{CH}_3$ ), 1.34 - 1.50 (4 H, m, 2  $\times$   $\text{CH}_2$ ), 2.14 (2 H, tt,  $J = 7.0, 2.4$  Hz,  $\text{CH}_2$ ), 2.56 (3 H, s, Ar $\text{CH}_3$ ), 3.64 (2 H, t,  $J = 2.4$  Hz,  $\text{CH}_2$ ), 7.25 - 7.31 (1 H, m, Ar $\text{CH}$ ), 7.37 (1 H, td,  $J = 7.5, 1.3$  Hz, Ar $\text{CH}$ ), 7.75 (1 H, d,  $J = 8.0$  Hz, Ar $\text{CH}$ ), 7.80 (1 H, d,  $J = 7.8$  Hz, Ar $\text{CH}$ );  $\delta_{\text{C}}$  (101 MHz,  $\text{CDCl}_3$ ) 13.6 ( $\text{CH}_3$ ), 13.8 ( $\text{CH}_3$ ), 16.2 ( $\text{CH}_2$ ), 18.5 ( $\text{CH}_2$ ), 22.0 ( $\text{CH}_2$ ), 31.0 ( $\text{CH}_2$ ), 76.6 (CC), 80.9 (CC), 121.6 (Ar $\text{CH}$ ), 122.0 (Ar $\text{CH}$ ), 123.6 (Ar $\text{CH}$ ), 123.9 (Ar $\text{CH}$ ), 126.8 (ArC), 135.2 (ArC), 138.1 (ArC), 139.8 (ArC);  $\nu_{\text{max}}$  (neat)/ $\text{cm}^{-1}$  728, 907, 1025, 1174, 1324, 1435, 1460, 1669, 1708, 2870, 2929, 2956; **HRMS** (EI): Calcd. for  $\text{C}_{16}\text{H}_{18}\text{S}$  ( $\text{M}$ )<sup>+</sup>, 242.1124; found 242.1134.

### 3-(Hept-2-yn-1-yl)-2-pentylbenzo[b]thiophene **8e**

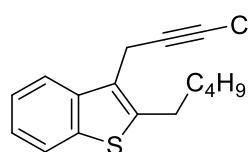

As described in general procedure **D**, 2-pentylbenzo[b]thiophene *S*-oxide (**1h**) (42 mg, 0.2 mmol), hept-2-yn-1-yltrimethylsilane (**7a**) (50.0 mg, 0.3 mmol) and trifluoroacetic anhydride (56  $\mu$ l, 0.4 mmol), gave **8e** (39 mg, 0.13 mmol, 65 %) as a yellow oil;  $\delta_{\text{H}}$  (400 MHz,  $\text{CDCl}_3$ ) 0.82 - 0.96 (6 H, m, 2  $\times$   $\text{CH}_3$ ), 1.30 - 1.47 (8 H, m, 4  $\times$   $\text{CH}_2$ ), 1.63 - 1.81 (2 H, m,  $\text{CH}_2$ ), 2.11 (2 H, tt,  $J = 7.0, 2.4$  Hz,  $\text{CH}_2$ ), 2.65 - 2.84 (2 H, m,  $\text{CH}_2$ ), 3.41 (2 H, q,  $J = 2.3$  Hz,  $\text{CH}_2$ ), 7.41 (1 H, td,  $J = 7.5, 1.2$  Hz, Ar $\text{CH}$ ), 7.52 (1 H, td,  $J = 7.6, 1.1$  Hz, Ar $\text{CH}$ ), 7.57 - 7.62 (1 H, m, Ar $\text{CH}$ ), 7.88 (1 H, dq,  $J = 7.5, 0.6$  Hz, Ar $\text{CH}$ );  $\delta_{\text{C}}$  (101 MHz,  $\text{CDCl}_3$ ) 13.5 ( $\text{CH}_3$ ), 14.0 ( $\text{CH}_3$ ), 16.5 ( $\text{CH}_2$ ), 18.3 ( $\text{CH}_2$ ), 21.9 ( $\text{CH}_2$ ), 22.4 ( $\text{CH}_2$ ), 25.2 ( $\text{CH}_2$ ), 29.5 ( $\text{CH}_2$ ), 30.7 ( $\text{CH}_2$ ), 31.5 ( $\text{CH}_2$ ), 74.0 (CC), 82.6 (CC), 122.6 (Ar $\text{CH}$ ), 125.9 (Ar $\text{CH}$ ), 127.7 (Ar $\text{CH}$ ), 131.8 (Ar $\text{CH}$ ), 135.4 (ArC), 138.6 (ArC), 143.6 (ArC), 149.0 (ArC);  $\nu_{\text{max}}$  (neat)/ $\text{cm}^{-1}$  757, 934, 1047, 1097, 1149, 1170, 1214, 1289, 1347, 1456, 1499, 1643, 1787, 2825, 2970, 2979; **HRMS** (EI): Calcd. for  $\text{C}_{20}\text{H}_{26}\text{S}$  ( $\text{M}$ )<sup>+</sup>, 298.1750; found 298.1748.

### 3-(Hept-2-yn-1-yl)-2-phenylbenzo[b]thiophene **8f**

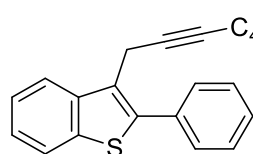

As described in general procedure **D**, 2-phenylbenzo[b]thiophene *S*-oxide (**1d**) (45 mg, 0.2 mmol), hept-2-yn-1-yltrimethylsilane (**7a**) (50.0 mg, 0.3 mmol) and trifluoroacetic anhydride (56  $\mu$ l, 0.4 mmol), gave **8f** (58 mg, 0.19 mmol, 95 %) as a yellow oil;  $\delta_{\text{H}}$  (400 MHz,  $\text{CDCl}_3$ ) 0.88 - 0.95 (3 H, d,

$J = 7.5$  Hz,  $CH_3$ ), 1.38 - 1.53 (4 H, m,  $2 \times CH_2$ ), 2.19 (2 H, tt,  $J = 6.9, 2.4$  Hz,  $CH_2$ ), 3.74 (2 H, t,  $J = 2.4$  Hz,  $CH_2$ ), 7.36 - 7.53 (5 H, m, ArCH), 7.64 - 7.70 (2 H, m, ArCH), 7.86 (1 H, dt,  $J = 7.7, 0.9$  Hz, ArCH), 7.98 (1 H, dd,  $J = 8.0, 0.5$  Hz, ArCH);  $\delta_C$  (101 MHz,  $CDCl_3$ ) 13.6 ( $CH_3$ ), 17.4 ( $CH_2$ ), 18.5 ( $CH_2$ ), 21.9 ( $CH_2$ ), 31.0 ( $CH_2$ ), 77.2 (CC), 81.5 (CC), 122.1 (ArCH), 122.6 (ArCH), 124.2 (ArCH), 124.4 (ArCH), 127.2 (ArC), 128.1 (ArCH), 128.7 (ArCH), 129.6 (ArCH), 134.1 (ArC), 139.0 (ArC), 139.3 (ArC), 140.1 (ArC);  $\nu_{max}$  (neat)/ $cm^{-1}$  697, 715, 730, 751, 907, 1028, 1079, 1323, 1434, 1601, 2859, 2869, 2928, 2955; **HRMS** (EI): Calcd. for  $C_{21}H_{21}S$  (M+H)<sup>+</sup>, 305.1357; found 305.1358.

### 3-(Hept-2-yn-1-yl)benzo[b]thiophene **8g**

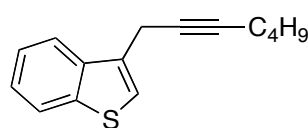

As described in general procedure **E**, benzo[b]thiophene (67 mg, 0.5 mmol) and  $H_2O_2$  (60  $\mu$ l, 30% aq., 0.5 mmol) in  $CH_2Cl_2$  and TFA (2 mL, 1:1), then hept-2-yn-1-yltrimethylsilane (**7a**) (126 mg, 0.75 mmol) and trifluoroacetic anhydride (105  $\mu$ l, 0.75 mmol), gave **8g** (68 mg, 0.3 mmol, 60 %) as a colourless oil;  $\delta_H$  (400 MHz,  $CDCl_3$ ) 0.94 (3 H, t,  $J = 7.3$  Hz,  $CH_3$ ), 1.41 - 1.58 (4 H, m,  $2 \times CH_2$ ), 2.25 (2 H, m,  $CH_2$ ), 3.73 (2 H, dq,  $J = 2.8, 1.7, 1.3$  Hz,  $CH_2$ ), 7.34 - 7.42 (3 H, m, ArCH), 7.75 - 7.78 (1 H, m, ArCH), 7.85 - 7.88 (1 H, m, ArCH);  $\delta_C$  (101 MHz,  $CDCl_3$ ) 13.8 ( $CH_3$ ), 18.7 ( $CH_2$ ), 19.3 ( $CH_2$ ), 22.2 ( $CH_2$ ), 31.2 ( $CH_2$ ), 76.4 (CC), 83.0 (CC), 121.6 (ArCH), 122.8 (ArCH), 123.0 (ArCH), 124.0 (ArCH), 124.4 (ArCH), 132.2 (ArC), 138.2 (ArC), 140.8 (ArC);  $\nu_{max}$  (neat)/ $cm^{-1}$  1072, 1252, 1430, 1460, 2870, 2929, 2955; **HRMS** (APCI): Calcd. for  $C_{15}H_{17}S$  (M+H)<sup>+</sup>, 229.1045; found 229.1043.

### 3-(Hept-2-yn-1-yl)-5-nitrobenzo[b]thiophene **8h**

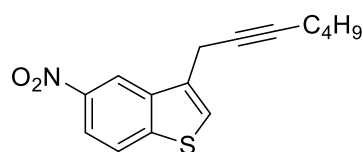

As described in general procedure **D**, 5-nitrobenzo[b]thiophene *S*-oxide (**1b**) (39 mg, 0.2 mmol), hept-2-yn-1-yltrimethylsilane (**7a**) (50 mg, 0.3 mmol) and trifluoroacetic anhydride (56  $\mu$ l, 0.4 mmol), gave **8h** (42 mg, 0.15 mmol, 76 %) as a yellow oil;  $\delta_H$  (400 MHz,  $CDCl_3$ ) 0.92 (3 H, t,  $J = 7.3$  Hz,  $CH_3$ ), 1.40 - 1.56 (4 H, m,  $2 \times CH_2$ ), 2.25 (2 H, tt,  $J = 7.0, 2.4$  Hz,  $CH_2$ ), 3.79 (2 H, td,  $J = 2.4, 1.3$  Hz,  $CH_2$ ), 7.55 (1 H, t,  $J = 1.0$  Hz, ArCH), 7.93 - 7.97 (1 H, m, ArCH), 8.18 - 8.25 (1 H, m, ArCH), 8.67 - 8.74 (1 H, m, ArCH);  $\delta_C$  (101 MHz,  $CDCl_3$ ) 13.6 ( $CH_3$ ), 18.4 ( $CH_2$ ), 19.2 ( $CH_2$ ), 22.0 ( $CH_2$ ), 30.9 ( $CH_2$ ), 75.3 (CC), 83.6 (CC), 117.5 (ArCH), 118.7 (ArCH), 123.4 (ArCH), 126.2 (ArCH), 133.4 (ArC), 138.0 (ArC), 145.2 (ArCNO<sub>2</sub>), 146.6 (ArC);  $\nu_{max}$  (neat)/ $cm^{-1}$  729, 819, 907, 1035, 1119, 1247, 1341, 1379, 1510, 1533, 1682,

1708, 2871, 2931, 2957; **HRMS** (EI): Calcd. for C<sub>15</sub>H<sub>16</sub>O<sub>2</sub>NS (M+H)<sup>+</sup>, 274.0896; found 274.0887.

### 5-Bromo-3-(hept-2-yn-1-yl)benzo[b]thiophene **8i**

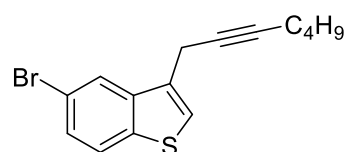

As described in general procedure **D**, 5-bromobenzo[b]thiophene *S*-oxide (**1a**) (46 mg, 0.2 mmol) hept-2-yn-1-yltrimethylsilane (**7a**) (50 mg, 0.3 mmol) and trifluoroacetic anhydride (56  $\mu$ l, 0.4 mmol), gave **8i** (42 mg, 0.13 mmol, 68 %) as a yellow oil;  $\delta_{\text{H}}$  (400 MHz, CDCl<sub>3</sub>) 0.94 (3 H, t,  $J$  = 7.3 Hz, CH<sub>3</sub>), 1.41 - 1.58 (4 H, m, 2  $\times$  CH<sub>2</sub>), 2.25 (2 H, tt,  $J$  = 7.0, 2.3 Hz, CH<sub>2</sub>), 3.68 (2 H, td,  $J$  = 2.4, 1.3 Hz, CH<sub>2</sub>), 7.38 - 7.41 (1 H, m, ArCH), 7.45 (1 H, dt,  $J$  = 8.5, 1.0 Hz, ArCH), 7.71 (1 H, dd,  $J$  = 8.5, 0.5 Hz, ArCH), 7.93 (1 H, d,  $J$  = 1.8 Hz, ArCH);  $\delta_{\text{C}}$  (101 MHz, CDCl<sub>3</sub>) 13.6 (CH<sub>3</sub>), 18.5 (CH<sub>2</sub>), 19.1 (CH<sub>2</sub>), 22.0 (CH<sub>2</sub>), 31.0 (CH<sub>2</sub>), 75.8 (CC), 83.1 (CC), 118.1 (ArCBr), 124.2 (ArCH), 124.4 (2  $\times$  ArCH), 127.3 (ArCH), 131.5 (ArC), 139.3 (ArC), 139.8 (ArC);  $\nu_{\text{max}}$  (neat)/cm<sup>-1</sup> 787, 867, 1067, 1247, 1418, 1498, 1662, 1706, 2858, 2928, 2952; **HRMS** (EI): Calcd. for C<sub>15</sub>H<sub>15</sub>SBr (M)<sup>+</sup>, 306.0072; found 306.0065.

### 3-(Hept-2-yn-1-yl)-5-(4-(trifluoromethyl)phenyl)benzo[b]thiophene **8j**

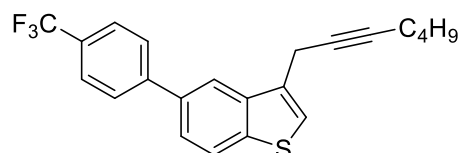

As described in general procedure **D**, 5-(4-(trifluoromethyl)phenyl)benzo[b]thiophene *S*-oxide (**1i**) (57 mg, 0.2 mmol), hept-2-yn-1-yltrimethylsilane (**7a**) (50.0 mg, 0.3 mmol) and trifluoroacetic anhydride (56  $\mu$ l, 0.4 mmol), gave **8j** (63 mg, 0.17 mmol, 84 %) as a yellow oil;  $\delta_{\text{H}}$  (400 MHz, CDCl<sub>3</sub>) 0.91 (3 H, t,  $J$  = 7.3 Hz, CH<sub>3</sub>), 1.41 - 1.57 (4 H, m, 2  $\times$  CH<sub>2</sub>), 2.26 (2 H, tt,  $J$  = 7.0, 2.3 Hz, CH<sub>2</sub>), 3.76 - 3.82 (2 H, m, CH<sub>2</sub>), 7.45 (1 H, s, ArCH), 7.60 (1 H, dd,  $J$  = 8.4, 1.6 Hz, ArCH), 7.71 - 7.80 (4 H, m, ArCH), 7.95 (1 H, d,  $J$  = 8.5 Hz, ArCH), 7.98 (1 H, d,  $J$  = 1.3 Hz, ArCH);  $\delta_{\text{C}}$  (101 MHz, CDCl<sub>3</sub>) 13.6 (CH<sub>3</sub>), 18.5 (CH<sub>2</sub>), 19.2 (CH<sub>2</sub>), 22.0 (CH<sub>2</sub>), 31.0 (CH<sub>2</sub>), 76.0 (CC), 83.0 (CC), 120.2 (ArCH), 125.3 (d,  $J$  = 272.0 Hz, CF<sub>3</sub>), 123.4 (ArCH), 123.8 (ArCH), 123.8 (ArCH), 127.7 (ArCH), 129.2 (q,  $J$  = 32.4 Hz, ArCCF<sub>3</sub>), 132.3 (ArC), 136.0 (ArC), 138.7 (ArC), 140.6 (ArC), 145.0 (ArC);  $\nu_{\text{max}}$  (neat)/cm<sup>-1</sup> 731, 808, 907, 1069, 1121, 1272, 1321, 1615, 1709, 2931, 2958; **HRMS** (EI): Calcd. for C<sub>22</sub>H<sub>20</sub>F<sub>3</sub>S (M+H)<sup>+</sup>, 373.1232; found 373.1227.

### 5-Bromo-3-(5-phenylpent-2-yn-1-yl)benzo[b]thiophene **8k**

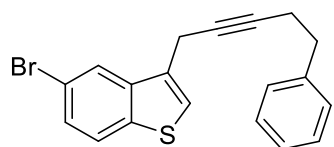

As described in general procedure **D**, 5-bromobenzo[b]thiophene *S*-oxide (**1a**) (46 mg, 0.2 mmol), trimethyl(5-phenylpent-2-yn-1-yl)silane (**7b**) (64 mg, 0.3 mmol) and trifluoroacetic anhydride (56  $\mu$ l, 0.4 mmol), gave **8k** (57 mg, 0.16 mmol, 81 %) as a yellow oil;  $\delta_{\text{H}}$  (400 MHz,  $\text{CDCl}_3$ ) 2.57 (2 H, tt,  $J = 7.4, 2.4$  Hz,  $\text{CH}_2$ ), 2.88 (2 H, t,  $J = 7.4$  Hz,  $\text{CH}_2$ ), 3.64 (2 H, t,  $J = 2.4$  Hz,  $\text{CH}_2$ ), 7.21 - 7.33 (6 H, m, ArCH), 7.46 (1 H, dd,  $J = 8.5, 1.8$  Hz, ArCH), 7.71 (1 H, d,  $J = 8.5$  Hz, ArCH), 7.88 (1 H, d,  $J = 1.8$  Hz, ArCH);  $\delta_{\text{C}}$  (101 MHz,  $\text{CDCl}_3$ ) 19.0 ( $\text{CH}_2$ ), 20.9 ( $\text{CH}_2$ ), 35.2 ( $\text{CH}_2$ ), 76.7 (CC), 82.3 (CC), 118.1 (ArCBr), 124.2 (ArCH), 124.3 (ArCH), 124.6 (ArCH), 126.3 (ArCH), 127.3 (ArCH), 128.4 (2  $\times$  ArCH), 128.5 (2  $\times$  ArCH), 131.2 (ArC), 139.3 (ArC), 139.7 (ArC), 140.7 (ArC);  $\nu_{\text{max}}$  (neat)/ $\text{cm}^{-1}$  731, 860, 907, 1026, 1062, 1149, 1249, 1418, 1494, 1681, 1707, 2922, 3025; HRMS (ASAP): Calcd. for  $\text{C}_{19}\text{H}_{16}\text{SBr}$  (M+H)<sup>+</sup>, 355.0151; found 355.0145.

### 5-Bromo-3-(6-chlorohex-2-yn-1-yl)benzo[b]thiophene **8l**

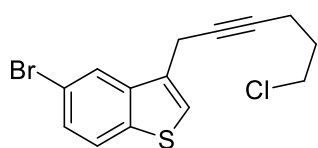

As described in general procedure **D**, 5-bromo-benzo[b]thiophene *S*-oxide (**1a**) (46 mg, 0.2 mmol), (6-chlorohex-2-yn-1-yl)trimethylsilane (56 mg, 0.3 mmol) and trifluoroacetic anhydride (56  $\mu$ L, 0.4 mmol), gave **8l** (55 mg, 0.17 mmol, 84%) as a colourless oil;  $\delta_{\text{H}}$  (400 MHz,  $\text{CDCl}_3$ ) 2.00 (2 H, quin,  $J = 6.6$  Hz,  $\text{CH}_2$ ), 2.45 (2 H, tt,  $J = 6.8, 2.4$  Hz,  $\text{CH}_2$ ), 3.65 - 3.72 (4 H, m, 2  $\times$   $\text{CH}_2$ ), 7.39 (1 H, s, ArCH), 7.46 (1 H, dd,  $J = 8.5, 1.9$  Hz, ArCH), 7.72 (1 H, d,  $J = 8.5$  Hz, ArCH), 7.92 (1 H, d,  $J = 1.9$  Hz, ArCH);  $\delta_{\text{C}}$  (101 MHz,  $\text{CDCl}_3$ ) 16.2 ( $\text{CH}_2$ ), 19.1 ( $\text{CH}_2$ ), 31.5 ( $\text{CH}_2$ ), 43.7 ( $\text{CH}_2$ ), 77.2 (CCCH<sub>2</sub>), 81.0 (CCCH<sub>2</sub>), 118.2 (ArCBr), 124.2 (ArCH), 124.4 (ArCH), 124.5 (ArCH), 127.4 (ArCH), 131.1 (ArC), 139.3 (ArC), 139.7 (ArC);  $\nu_{\text{max}}$  (neat)/ $\text{cm}^{-1}$  704, 797, 1037, 1064, 1149, 1207, 1262, 1418, 1498, 1544, 1580, 1678, 1708, 2920, 3093; HRMS (APCI): Calcd. for  $\text{C}_{14}\text{H}_{12}\text{BrClS}$  (M)<sup>+</sup>, 325.9532; found 325.9530.

### 5-Bromo-3-(3-cyclohexylprop-2-yn-1-yl)benzo[b]thiophene **8m**

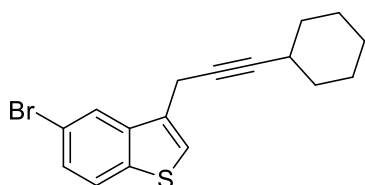

As described in general procedure **D**, 5-bromobenzo[b]thiophene *S*-oxide (**1a**) (46 mg, 0.2 mmol), (3-cyclohexylprop-2-yn-1-yl)trimethylsilane (**7c**) (54 mg, 0.3 mmol) and trifluoroacetic anhydride (56  $\mu$ l, 0.4 mmol), gave **8m** (54 mg, 0.16 mmol, 82 %) as a yellow oil;  $\delta_{\text{H}}$  (400 MHz,  $\text{CDCl}_3$ ) 1.32 - 1.36 (2 H, m,  $\text{CH}_2$ ), 1.44 - 1.57 (4 H, m, 2  $\times$   $\text{CH}_2$ ), 1.71 - 1.87 (4 H, m, 2  $\times$   $\text{CH}_2$ ), 2.44 (1 H, t,  $J = 9.0$  Hz,



CH), 3.70 (2 H, t,  $J = 1.5$  Hz,  $CH_2$ ), 7.40 (1 H, s, ArCH), 7.45 (1 H, dd,  $J = 8.5, 1.8$  Hz, ArCH), 7.71 (1 H, d,  $J = 8.5$  Hz, ArCH), 7.94 (1 H, d,  $J = 2.0$  Hz, ArCH);  $\delta_C$  (101 MHz,  $CDCl_3$ ) 19.2 ( $CH_2$ ), 24.9 ( $2 \times CH_2$ ), 25.9 ( $2 \times CH_2$ ), 29.2 (CH), 32.9 ( $CH_2$ ), 75.7 (CC), 87.5 (CC), 118.1 (ArCBr), 124.2 (ArCH), 124.4 (ArCH), 124.5 (ArCH), 127.3 (ArCH), 131.6 (ArC), 139.3 (ArC), 139.8 (ArC);  $\nu_{max}$  (neat)/ $cm^{-1}$  777, 814, 863, 906, 1026, 1059, 1071, 1149, 1250, 1344, 1421, 1446, 1556, 1580, 2849, 2897, 2930; **HRMS** (EI): Calcd. for  $C_{17}H_{17}SBr$  (M)<sup>+</sup>, 332.0229; found 332.0227.

### 3-(3-Cyclohexylprop-2-yn-1-yl)benzo[b]thiophene **8n**

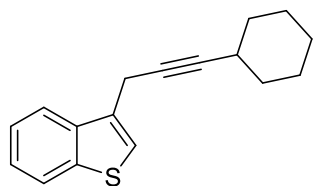

As described in general procedure **E**, benzo[b]thiophene (67 mg, 0.5 mmol) and  $H_2O_2$  (60  $\mu$ L, 30% aq., 0.5 mmol) in  $CH_2Cl_2$  and TFA (2 mL, 1:1), then (3-cyclohexylprop-2-yn-1-yl)trimethylsilane (**7c**) (135 mg, 0.75 mmol) and trifluoroacetic anhydride (0.14 mL, 1.0 mmol), gave **8n** (74 mg, 0.30 mmol, 60 %) as a yellow oil;  $\delta_H$  (400 MHz,  $CDCl_3$ ) 1.25 - 1.58 (6 H, m,  $3 \times CH_2$ ), 1.69 - 1.92 (4 H, m,  $2 \times CH_2$ ), 2.45 (1 H, t,  $J = 9.0$  Hz, CH), 3.73 - 3.77 (2 H, m,  $CH_2$ ), 7.33 - 7.44 (3 H, m, ArCH), 7.77 (1 H, dt,  $J = 7.7, 0.7$  Hz, ArCH), 7.83 - 7.90 (1 H, m, ArCH);  $\delta_C$  (101 MHz,  $CDCl_3$ ) 19.2 ( $2 \times CH_2$ ), 24.9 ( $2 \times CH_2$ ), 25.9 ( $2 \times CH_2$ ), 29.2 (CH), 33.0 ( $CH_2$ ), 76.1 (CC), 87.2 (CC), 121.4 (ArCH), 122.6 (ArCH), 122.9 (ArCH), 123.9 (ArCH), 124.3 (ArCH), 132.1 (ArC), 138.1 (ArC), 140.7 (ArC);  $\nu_{max}$  (neat)/ $cm^{-1}$  725, 750, 906, 1429, 1447, 1681, 2851, 2926; **HRMS** (EI): Calcd. for  $C_{17}H_{19}S$  (M+H)<sup>+</sup>, 255.1202; found 255.1199.

### 5-Bromo-3-(3-phenylprop-2-yn-1-yl)benzo[b]thiophene **8o**

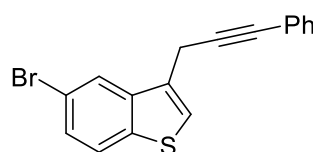

As described in general procedure **D**, 5-bromo-benzo[b]thiophene *S*-oxide (**1a**) (40 mg, 0.17 mmol), trimethyl(3-phenylprop-2-yn-1-yl)silane (49 mg, 0.26 mmol) and trifluoroacetic anhydride (49  $\mu$ L, 0.34 mmol), gave **8o** (33 mg, 0.10 mmol, 59%) as a yellow solid; **m.p.**: 91-92 °C;  $\delta_H$  (400 MHz,  $CDCl_3$ ) 3.95 (2 H, d,  $J = 1.3$  Hz,  $CH_2$ ), 7.30 - 7.35 (3 H, m,  $3 \times ArCH$ ), 7.45 - 7.52 (4 H, m,  $4 \times ArCH$ ), 7.73 (1 H, d,  $J = 8.5$  Hz, ArCH), 7.99 (1 H, d,  $J = 1.8$  Hz, ArCH);  $\delta_C$  (101 MHz,  $CDCl_3$ ) 19.7 ( $CH_2$ ), 83.1 (CCPh), 85.6 (CCPh), 118.3 (ArCBr), 123.3 (ArC), 124.3 (ArCH), 124.4 (ArCH), 124.9 (ArCH), 127.5 (ArCH), 128.1 ( $2 \times ArCH$ ), 128.3 (ArCH), 130.5 (ArC), 131.7 ( $2 \times ArCH$ ), 139.3 (ArC), 139.8 (ArC);  $\nu_{max}$  (neat)/ $cm^{-1}$  721, 813, 871, 910, 968, 1032, 1149, 1245, 1417, 1439, 1555, 1579, 1738, 3055; **HRMS** (APCI): Calcd. for  $C_{17}H_{11}BrS$  (M)<sup>+</sup>, 325.9759; found 325.9759.

### [3-(5-Bromobenzo[b]thiophen-3-yl)prop-1-yn-1-yl]trimethylsilane **8p**

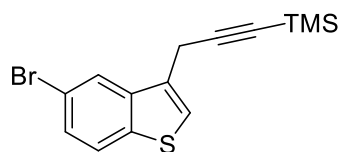

As described in general procedure **D**, 5-bromobenzo[b]thiophene *S*-oxide (**1a**) (46 mg, 0.2 mmol), prop-1-yne-1,3-diylbis(trimethylsilane) (**7d**) (55 mg, 0.3 mmol) and trifluoroacetic anhydride (56  $\mu$ l, 0.4 mmol), gave **8p** (59 mg, 0.18 mmol, 91 %) as a yellow oil;  $\delta_{\text{H}}$  (400 MHz,  $\text{CDCl}_3$ ) 0.24 (9 H, s,  $\text{Si}(\text{CH}_3)_3$ ), 3.75 (2 H, d,  $J = 1.3$  Hz,  $\text{CH}_2$ ), 7.41 (1 H, s, ArCH), 7.46 (1 H, dd,  $J = 8.5, 1.8$  Hz, ArCH), 7.71 (1 H, d,  $J = 8.5$  Hz, ArCH), 7.93 (1 H, d,  $J = 1.8$  Hz, ArCH);  $\delta_{\text{C}}$  (101 MHz,  $\text{CDCl}_3$ ) 0.0 ( $\text{Si}(\text{CH}_3)_3$ ), 20.2 ( $\text{CH}_2$ ), 87.7 (CC  $\text{Si}(\text{CH}_3)_3$ ), 102.3 (CC  $\text{Si}(\text{CH}_3)_3$ ), 118.2 (ArCBr), 124.2 (ArCH), 124.4 (ArCH), 124.8 (ArCH), 127.4 (ArCH), 130.1 (ArC), 139.3 (ArC), 139.6 (ArC);  $\nu_{\text{max}}$  (neat)/ $\text{cm}^{-1}$  730, 777, 815, 999, 1012, 1045, 1149, 1248, 1419, 1581, 2178, 2957; HRMS (EI): Calcd. for  $\text{C}_{14}\text{H}_{15}\text{SSiBr}$  (M)<sup>+</sup>, 321.9842; found 321.9842.

### [3-(Benzo[b]thiophen-3-yl)prop-1-yn-1-yl]trimethylsilane<sup>3</sup> **8q**

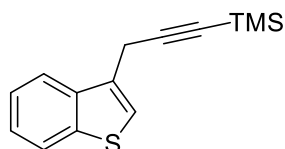

As described in general procedure **E** benzo[b]thiophene (67 mg, 0.5 mmol) and  $\text{H}_2\text{O}_2$  (60  $\mu$ l, 30% aq., 0.5 mmol) in  $\text{CH}_2\text{Cl}_2$  and TFA (2 mL, 1:1), then prop-1-yne-1,3-diylbis(trimethylsilane) (**7d**) (0.13 g, 0.75 mmol) and trifluoroacetic anhydride (0.14 mL, 1.0 mmol), gave **8q** (97 mg, 0.39 mmol, 80 %) as a yellow oil;  $\delta_{\text{H}}$  (400 MHz,  $\text{CDCl}_3$ ) 0.89 (3 H, t,  $J = 7.3$  Hz,  $\text{CH}_3$ ), 1.33 - 1.52 (4 H, m,  $2 \times \text{CH}_2$ ), 2.14 (2 H, tt,  $J = 7.0, 2.4$  Hz,  $\text{CH}_2$ ), 3.74 (2 H, t,  $J = 2.4$  Hz,  $\text{CH}_2$ ), 7.32 - 7.42 (2 H, m,  $2 \times$  ArCH), 7.73 (1 H, ddd,  $J = 7.8, 1.4, 0.7$  Hz,  $\text{CH}_2$ ), 7.88 - 7.96 (1 H, m,  $\text{CH}_2$ );  $\delta_{\text{C}}$  (101 MHz,  $\text{CDCl}_3$ ) 0.7 ( $\text{Si}(\text{CH}_3)_3$ ), 20.2 ( $\text{CH}_2$ ), 87.3 (CCSi( $\text{CH}_3$ )<sub>3</sub>), 102.9 (CCSi( $\text{CH}_3$ )<sub>3</sub>), 121.3 (ArCH), 122.9 (ArCH), 123.0 (ArCH), 124.0 (ArCH), 124.4 (ArCH), 130.6 (ArC), 137.9 (ArC), 140.6 (ArC);  $\nu_{\text{max}}$  (neat)/ $\text{cm}^{-1}$  739, 788, 840, 999, 1021, 1052, 1149, 1237, 1424, 1590, 2163; HRMS (EI): Calcd. for  $\text{C}_{14}\text{H}_{15}\text{SSi}$  (M-H)<sup>+</sup> 244.0746; found 244.0738.

### 5-Bromo-3-(prop-2-yn-1-yl)benzo[b]thiophene **8r**

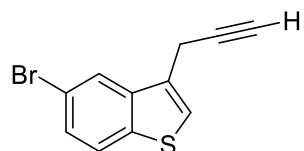

As described in general procedure **D**, 5-bromo-benzo[b]thiophene *S*-oxide (**1a**) (46 mg, 0.2 mmol), propargyl silane (44  $\mu$ L, 0.3 mmol) and trifluoroacetic anhydride (56  $\mu$ L, 0.4 mmol), gave **8r** (30 mg, 0.11 mmol, 58%) as a white solid; **m.p.**: 82-84  $^{\circ}\text{C}$ ;  $\delta_{\text{H}}$  (400 MHz,  $\text{CDCl}_3$ ) 2.26 (1 H, t,  $J = 2.8$  Hz, CCH), 3.72 (2 H, dd,  $J = 2.8, 1.3$  Hz,  $\text{CH}_2$ ), 7.44 - 7.50 (2 H, m,  $2 \times$  ArCH), 7.72 (1 H, d,  $J = 8.5$  Hz, ArCH), 7.90 (1 H, d,  $J = 1.8$  Hz, ArCH);  $\delta_{\text{C}}$  (101 MHz,  $\text{CDCl}_3$ ) 18.7 ( $\text{CH}_2$ ), 71.0 (CCH), 80.1 (CCH), 118.3 (ArCBr), 124.2 (ArCH), 124.2 (ArCH), 124.9 (ArCH), 127.5

(ArCH), 129.8 (ArC), 139.2 (ArC), 139.5 (ArC);  $\nu_{\max}$  (neat)/cm<sup>-1</sup> 721, 791, 799, 862, 1035, 1061, 1153, 1247, 1307, 1422, 1436, 1580, 1722, 3274; **HRMS** (APCI): Calcd. for C<sub>11</sub>H<sub>7</sub>BrS (M)<sup>+</sup>, 249.9446; found 249.9446.

### [3-(5-Bromobenzo[b]thiophen-3-yl)-3-cyclopentylprop-1-yn-1-yl]trimethylsilane **8s**

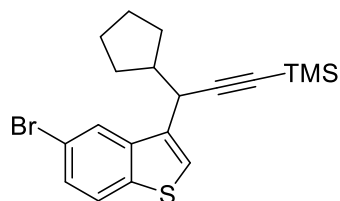

As described in general procedure **D**, 5-bromobenzo[b]thiophene *S*-oxide (**1a**) (46 mg, 0.2 mmol), (3-cyclopentylprop-1-yne-1,3-diyl)bis(trimethylsilane) (**7e**) (76 mg, 0.3 mmol) and trifluoroacetic anhydride (56  $\mu$ l, 0.4 mmol), gave **8s** (67 mg, 0.17 mmol, 85 %) as a yellow oil;  $\delta_{\text{H}}$  (400 MHz, CDCl<sub>3</sub>) 0.21 (9 H, s, Si(CH<sub>3</sub>)<sub>3</sub>), 1.41 - 1.72 (8 H, m, 4  $\times$  CH<sub>2</sub>), 2.36 - 2.46 (1 H, m, CH), 3.94 (1 H, d,  $J$  = 6.8 Hz, CH), 7.36 (1 H, s, ArCH), 7.44 (1 H, dd,  $J$  = 8.5, 1.8 Hz, ArCH), 7.71 (1 H, d,  $J$  = 8.5 Hz, ArCH), 8.09 (1 H, d,  $J$  = 1.8 Hz, ArCH);  $\delta_{\text{C}}$  (101 MHz, CDCl<sub>3</sub>) 0.1 (Si(CH<sub>3</sub>)<sub>3</sub>), 25.3 (CH<sub>2</sub>), 25.5 (CH<sub>2</sub>), 29.8 (CH<sub>2</sub>), 31.3 (CH<sub>2</sub>), 38.0 (CH), 44.1 (CH), 87.8 (CCSi(CH<sub>3</sub>)<sub>3</sub>), 106.2 (CCSi(CH<sub>3</sub>)<sub>3</sub>), 117.9 (ArCBr), 124.2 (ArCH), 124.6 (ArCH), 125.1 (ArCH), 127.2 (ArCH), 135.3 (ArC), 139.2 (ArC), 139.5 (ArC);  $\nu_{\max}$  (neat)/cm<sup>-1</sup> 697, 732, 758, 785, 820, 838, 907, 938, 1042, 1066, 1150, 1247, 1415, 1429, 1580, 2170, 2865, 2954; **HRMS** (EI): Calcd. for C<sub>19</sub>H<sub>24</sub>SSiBr (M)<sup>+</sup>, 391.0546; found 391.0544.

### [3-(5-Bromobenzo[b]thiophen-3-yl)hex-1-yn-1-yl]trimethylsilane **8t**

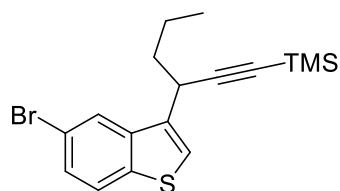

As described in general procedure **D**, 5-bromobenzo[b]thiophene *S*-oxide (**1a**) (46 mg, 0.2 mmol), hex-1-yne-1,3-diylbis(trimethylsilane) (**7f**) (68 mg, 0.3 mmol) and trifluoroacetic anhydride (56  $\mu$ l, 0.4 mmol), gave **8t** (60 mg, 0.16 mmol, 83 %) as a yellow oil;  $\delta_{\text{H}}$  (400 MHz, CDCl<sub>3</sub>) 0.18 - 0.23 (9 H, s, Si(CH<sub>3</sub>)<sub>3</sub>), 0.97 (3 H, t,  $J$  = 7.4 Hz, CH<sub>3</sub>), 1.55 (2 H, m, CH<sub>2</sub>), 1.85 (2 H, d,  $J$  = 8.0 Hz, CH<sub>2</sub>), 3.98 (1 H, s, CH), 7.36 (1 H, s, ArCH), 7.45 (1 H, dd,  $J$  = 8.7, 1.9 Hz, ArCH), 7.71 (1 H, d,  $J$  = 8.8 Hz, ArCH), 8.07 (1 H, d,  $J$  = 1.8 Hz, ArCH);  $\delta_{\text{C}}$  (101 MHz, CDCl<sub>3</sub>) 0.1 (Si(CH<sub>3</sub>)<sub>3</sub>), 13.7 (CH<sub>3</sub>), 20.5 (CH<sub>2</sub>), 32.9 (CH<sub>2</sub>), 37.8 (CH), 87.5 (CC), 106.9 (CC), 118.0 (ArC), 124.2 (ArCH), 124.3 (ArCH), 125.0 (ArCH), 127.2 (ArCH), 135.4 (ArC), 139.1 (ArC), 139.5 (ArC);  $\nu_{\max}$  (neat)/cm<sup>-1</sup> 731, 839, 907, 1068, 1248, 1323, 1431, 1580, 2170, 2932, 2957; **HRMS** (ESI): Calcd. for C<sub>17</sub>H<sub>21</sub>SSi (M)<sup>+</sup>, 364.0311; found 364.0298.

### [3-(Benzo[b]thiophen-3-yl)hex-1-yn-1-yl]trimethylsilane **8u**

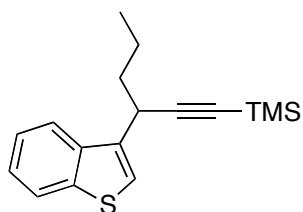

As described in general procedure **E**, benzo[b]thiophene (67 mg, 0.5 mmol) and H<sub>2</sub>O<sub>2</sub> (60 μl, 30% aq., 0.5 mmol) in CH<sub>2</sub>Cl<sub>2</sub> and TFA (2 mL, 1:1), then hex-1-yne-1,3-diylbis(trimethylsilane) (**7f**) (167 mg, 0.75 mmol) and trifluoroacetic anhydride (0.14 mL, 1.0 mmol), gave **8u** (0.11 g, 0.40 mmol, 80 %) as a colourless oil;  $\delta_{\text{H}}$  (400 MHz, CDCl<sub>3</sub>) 0.09 (9 H, s, Si(CH<sub>3</sub>)<sub>3</sub>), 0.85 (3 H, t,  $J = 7.4$  Hz, CH<sub>3</sub>), 1.43 (2 H, m, CH<sub>2</sub>), 1.75 (2 H, m, CH<sub>2</sub>), 3.95 (1 H, ddd,  $J = 8.5, 5.7, 0.7$  Hz, CH), 7.25 (3 H, m, ArCH), 7.74 (2H, ddt,  $J = 8.3, 1.7, 0.8$  Hz, ArCH);  $\delta_{\text{C}}$  (126 MHz, CDCl<sub>3</sub>) 0.31 (Si(CH<sub>3</sub>)<sub>3</sub>), 13.9 (CH<sub>3</sub>), 20.7 (CH<sub>2</sub>), 33.0 (CH), 38.1 (CH<sub>2</sub>), 87.1 (CC), 107.7 (CC), 122.1 (ArCH), 122.7 (ArCH), 123.1 (ArCH), 123.9 (ArCH), 124.3 (ArCH), 136.2 (ArC), 137.6 (ArC), 141.0 (ArC);  $\nu_{\text{max}}$  (neat)/cm<sup>-1</sup> 730, 757, 837, 871, 943, 1018, 1072, 1140, 1248, 1458, 2169, 2871, 2956; **HRMS** (APCI): Calc. for C<sub>17</sub>H<sub>23</sub>SSi (M+H<sup>+</sup>), 287.1284; found 287.1282.

### [3-(6-Bromobenzo[b]thiophen-3-yl)hex-1-yn-1-yl]trimethylsilane **8v**

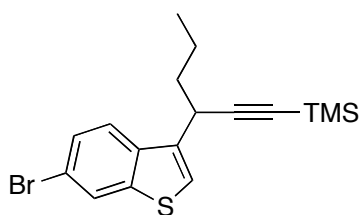

As described in general procedure **E**, 6-bromobenzo[b]thiophene (106 mg, 0.5 mmol) and H<sub>2</sub>O<sub>2</sub> (60 μl, 30% aq., 0.5 mmol) in CH<sub>2</sub>Cl<sub>2</sub> and TFA (2 mL, 1:1), then hex-1-yne-1,3-diylbis(trimethylsilane) (**7g**) (170 mg, 0.75 mmol) and trifluoroacetic anhydride (105 μl, 0.75 mmol), gave **8v** (157 mg, 0.3 mmol, 86 %) as a colourless oil;  $\delta_{\text{H}}$  (400 MHz, CDCl<sub>3</sub>) 0.18 (9 H, s, Si(CH<sub>3</sub>)<sub>3</sub>), 0.95 (3 H, t,  $J = 7.4$  Hz, CH<sub>3</sub>), 1.49 - 1.56 (2 H, m, CH<sub>2</sub>), 1.80 - 1.86 (2 H, m, CH<sub>2</sub>), 3.97 - 4.03 (1 H, m, CH), 7.32 (1 H, s, ArCH), 7.47 (1 H, dd,  $J = 8.6, 1.7$  Hz, ArCH), 7.72 (1 H, d,  $J = 8.6$  Hz, ArCH), 7.89 (1 H, m,  $J = 1.7$  Hz, ArCH);  $\delta_{\text{C}}$  (101 MHz, CDCl<sub>3</sub>) 0.3 (Si(CH<sub>3</sub>)<sub>3</sub>), 13.9 (CH<sub>3</sub>), 20.7 (CH<sub>2</sub>), 33.0 (CH), 38.0 (CH<sub>2</sub>), 87.4 (CC), 107.2 (CC), 118.3 (ArC), 123.2 (ArCH), 123.3 (ArCH), 125.6 (ArCH), 127.3 (ArCH), 136.0 (ArC), 136.4 (ArC), 142.5 (ArC);  $\nu_{\text{max}}$  (neat)/cm<sup>-1</sup> 758, 808, 838, 942, 1248, 1446, 1584, 2169, 2871, 2956; **HRMS** (ESI): Calcd. for C<sub>17</sub>H<sub>21</sub>SSiBr (M)<sup>+</sup>, 364.0311; found 364.0309.

Supplementary Figures  
<sup>1</sup>H and <sup>13</sup>C NMR spectra  
Supplementary Figure 1.  
**1a** <sup>1</sup>H NMR (400 MHz, CDCl<sub>3</sub>)

HJS082-03-PROTON.ESP

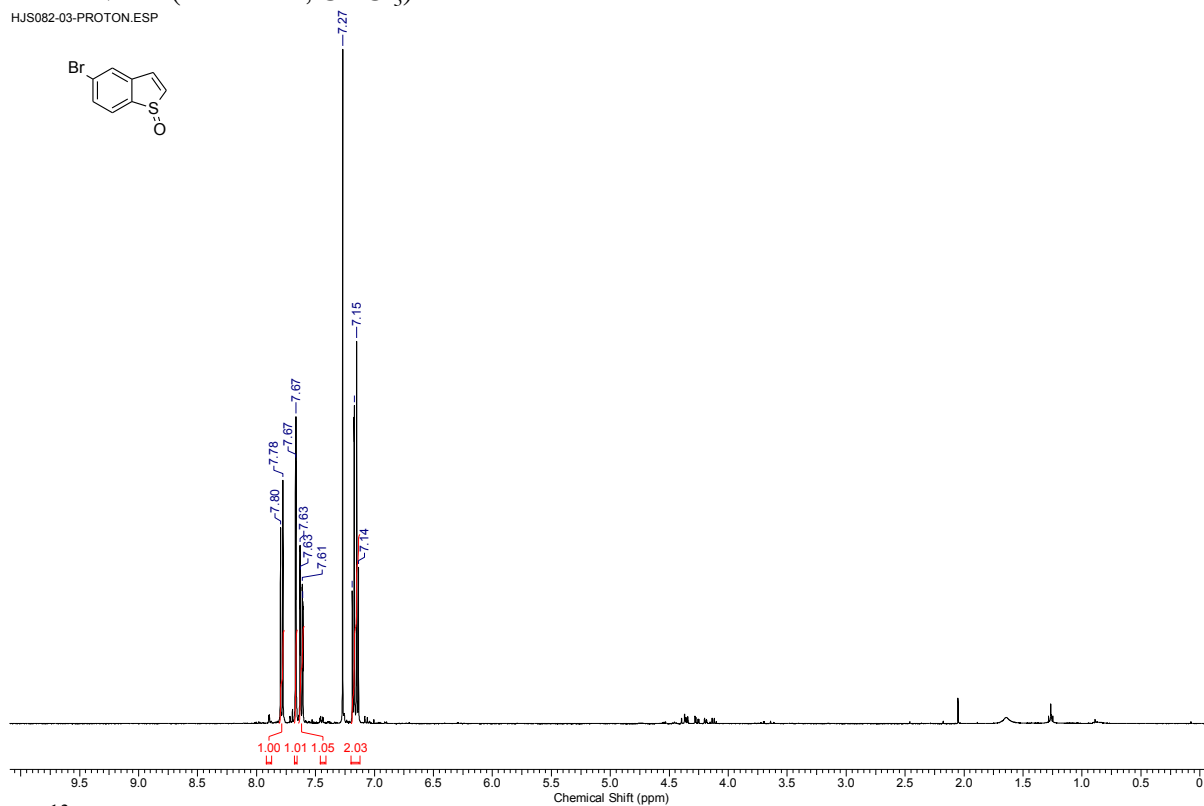

**1a** <sup>13</sup>C NMR (101 MHz)

HJS082-03-CARBON.ESP

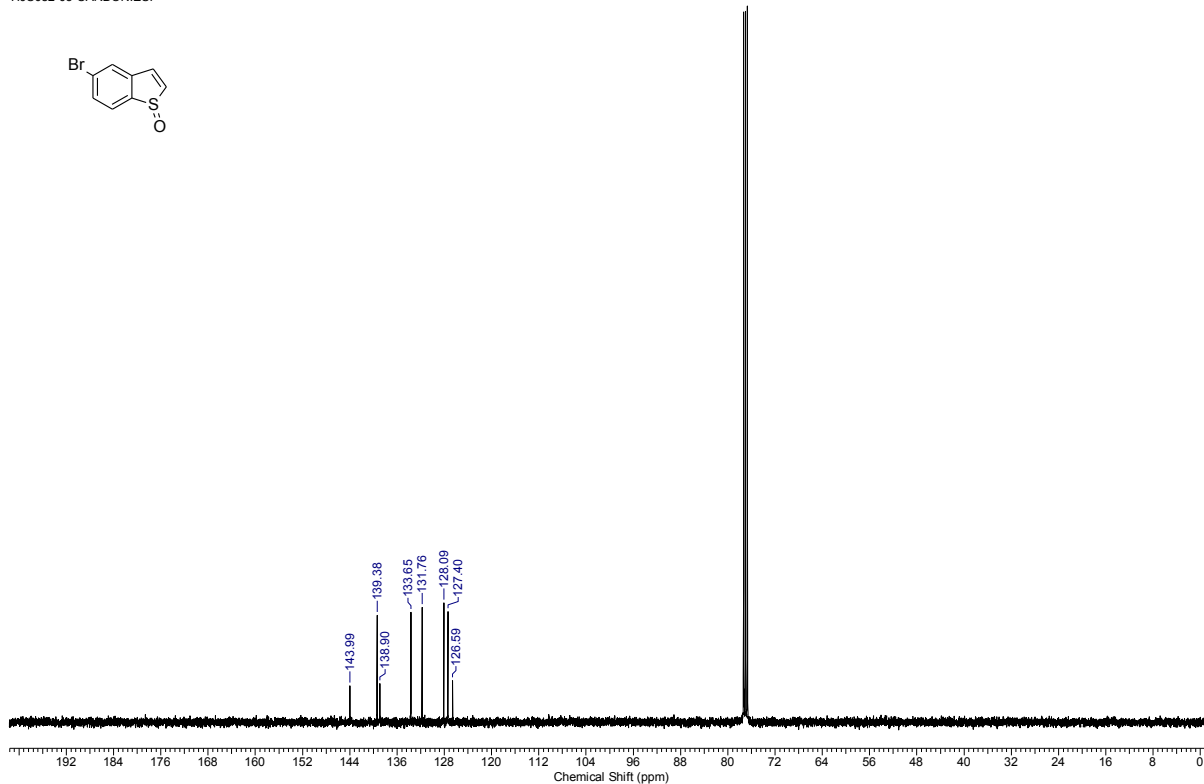

## Supplementary Figure 2.

### 1b <sup>1</sup>H NMR (400 MHz, CDCl<sub>3</sub>)

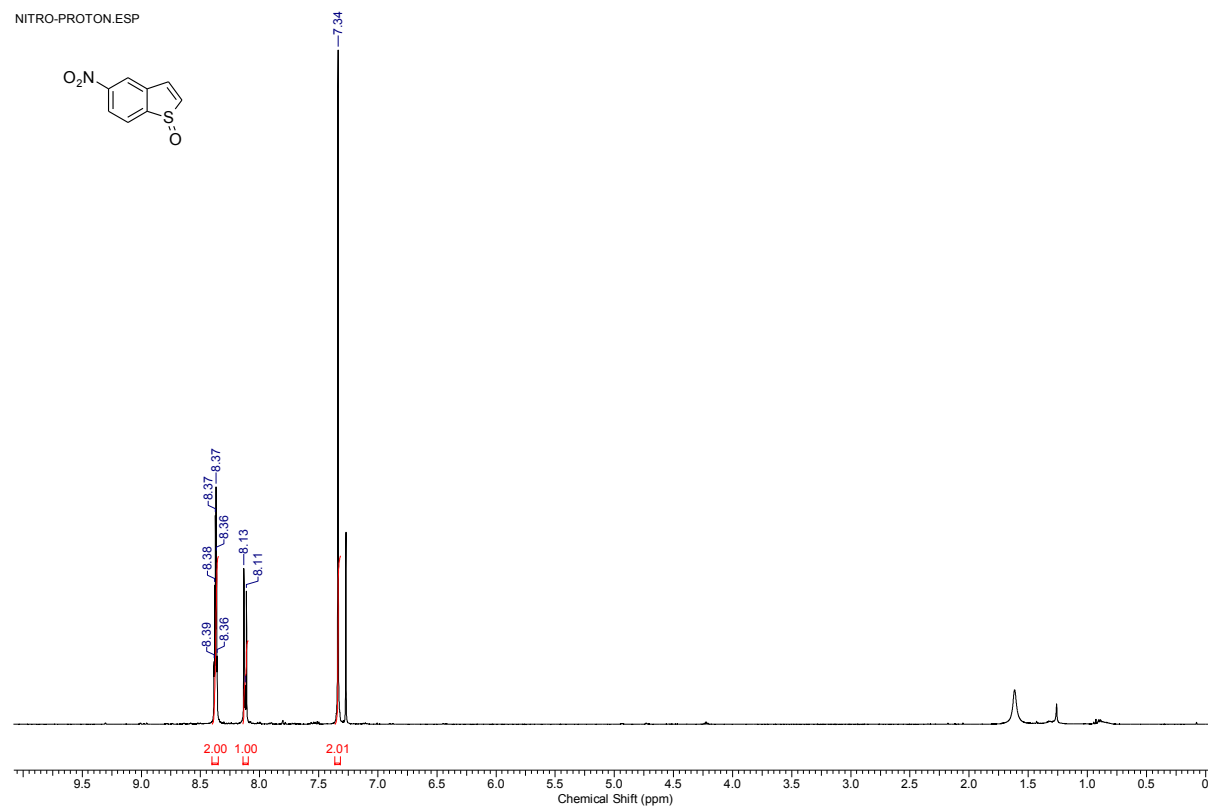

### 1b <sup>13</sup>C NMR (101 MHz, CDCl<sub>3</sub>)

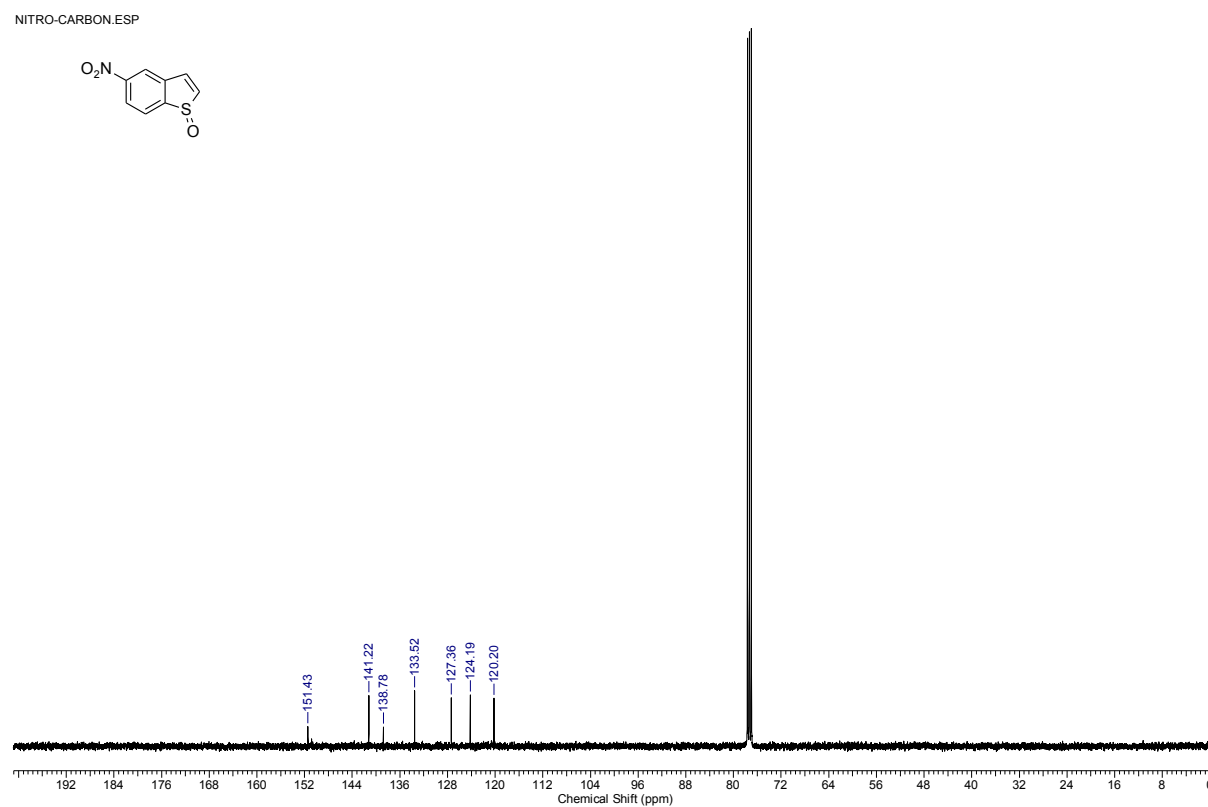

### Supplementary Figure 3.

#### 1c <sup>1</sup>H NMR (400 MHz, CDCl<sub>3</sub>)

HJS037-03-PROTON.ESP

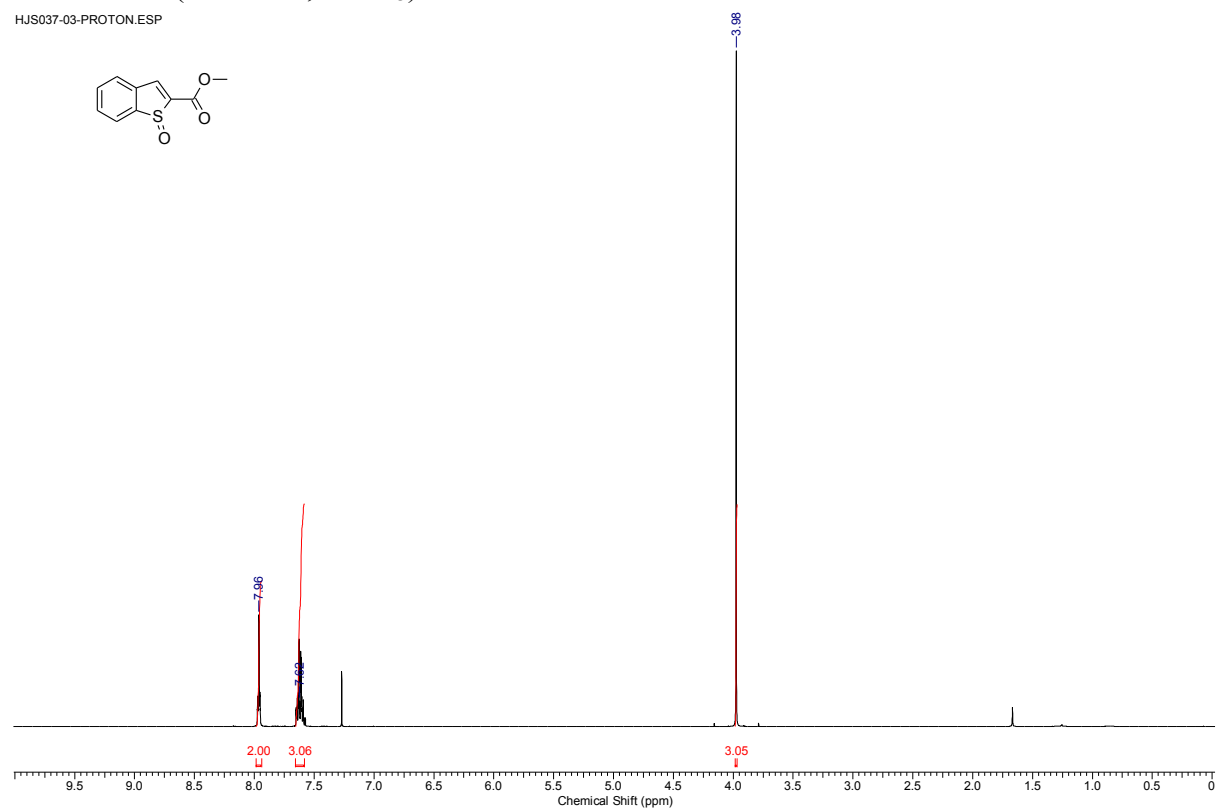

#### 1c <sup>13</sup>C NMR (101 MHz, CDCl<sub>3</sub>)

HJS037-03-CARBON.ESP

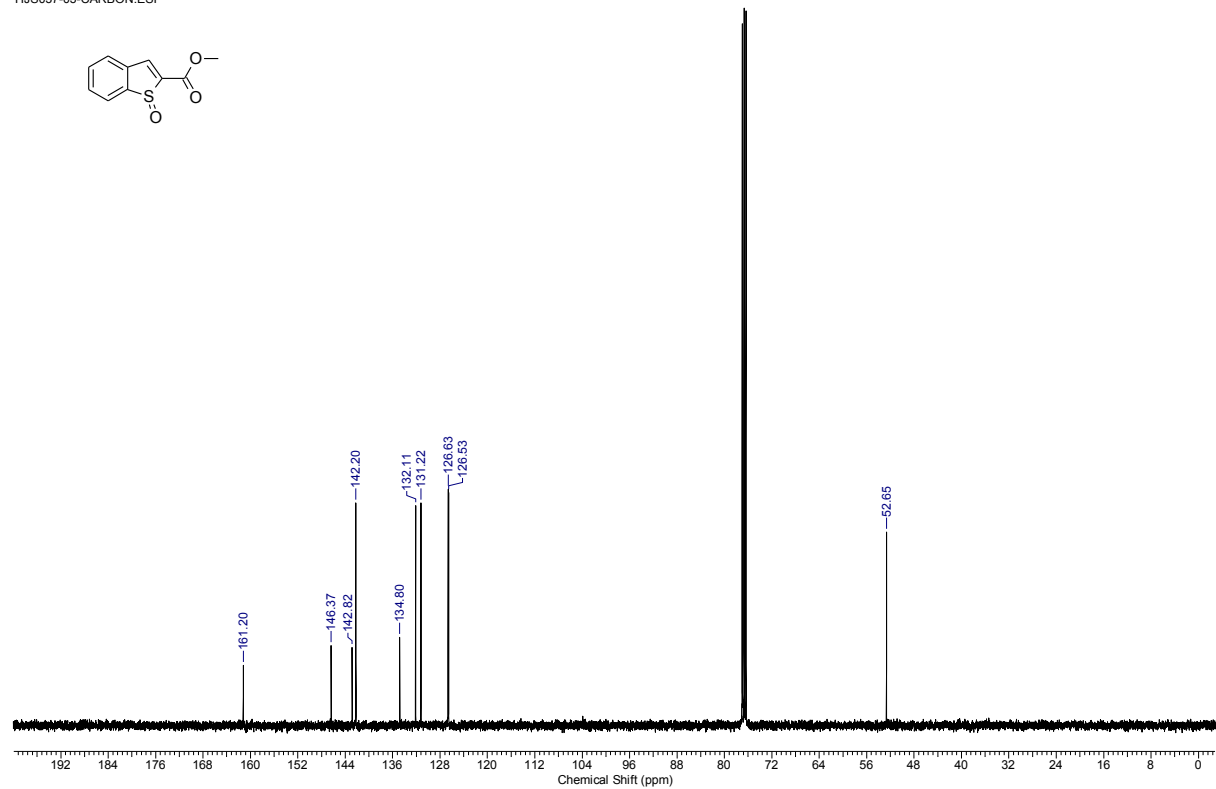

### Supplementary Figure 4.

### 1d <sup>1</sup>H NMR (400 MHz, CDCl<sub>3</sub>)

HJS038-03-PROTON.ESP

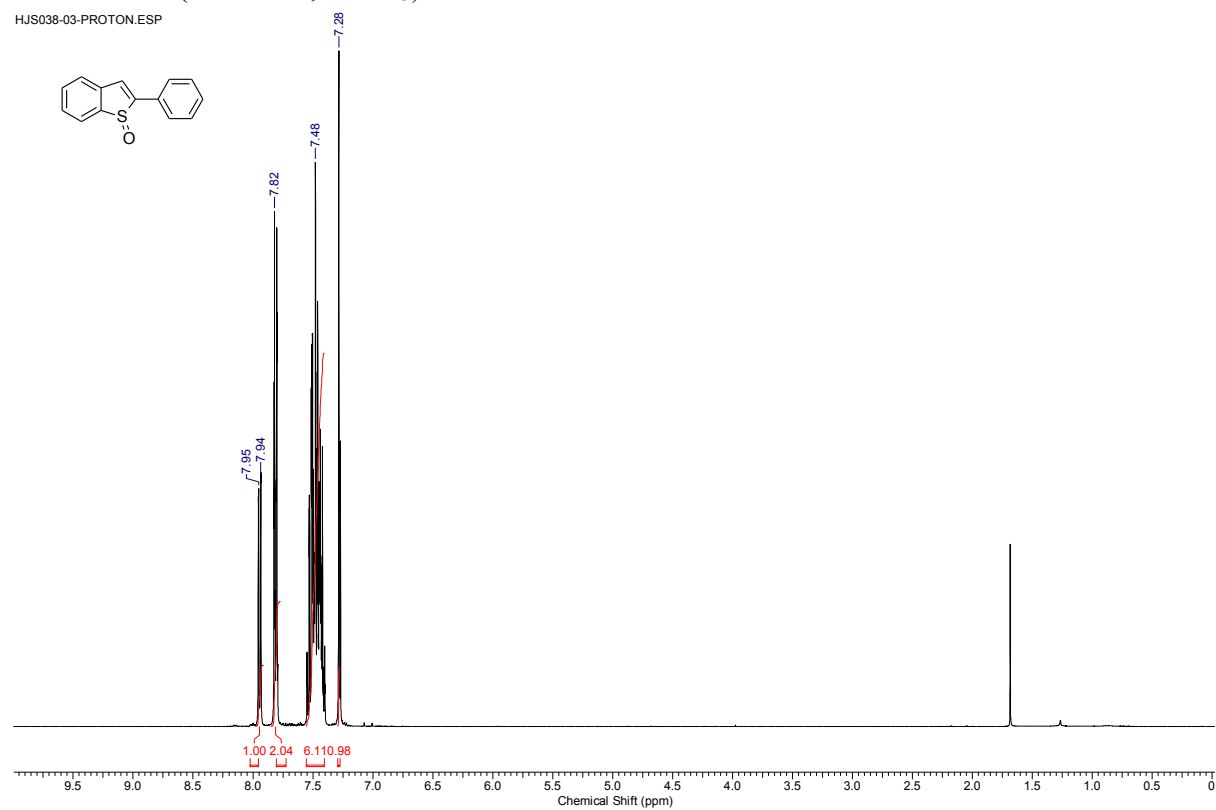

### 1d <sup>13</sup>C NMR (101 MHz, CDCl<sub>3</sub>)

HJS038-03-CARBON.ESP

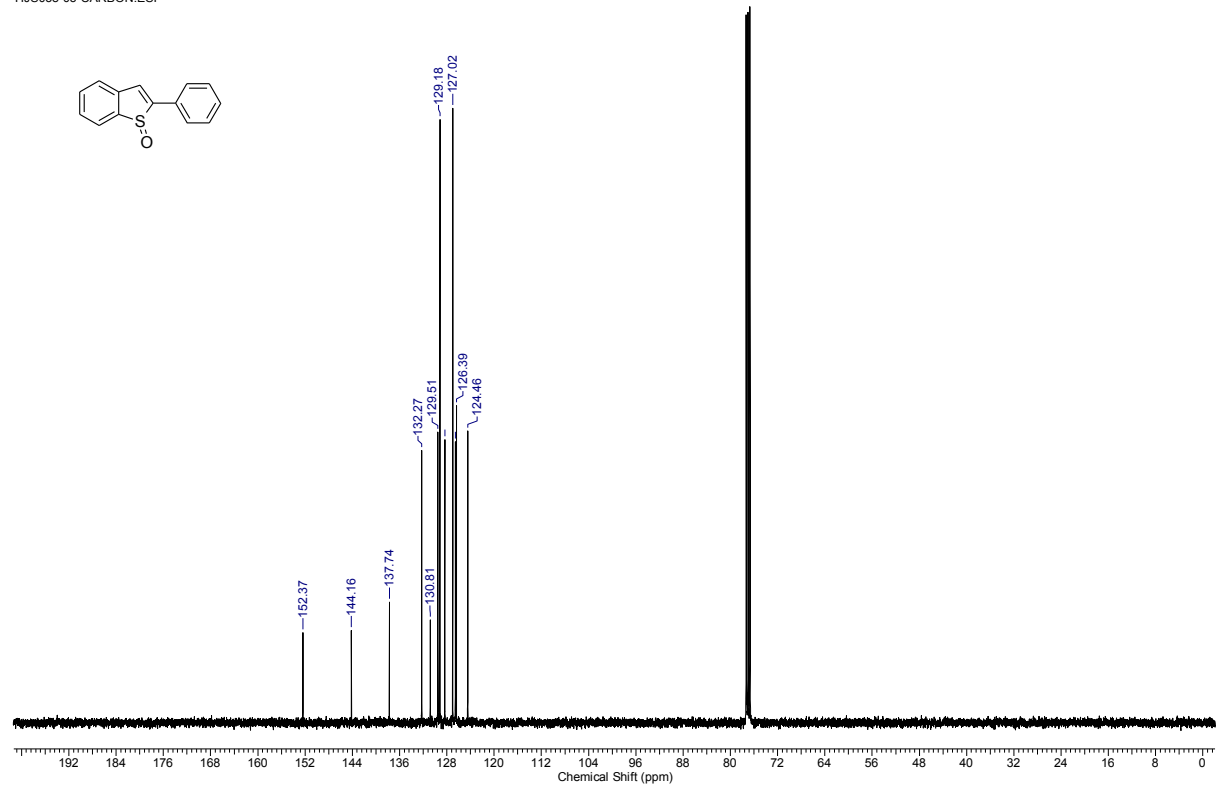



### Supplementary Figure 5.

### 1e <sup>1</sup>H NMR (400 MHz, CDCl<sub>3</sub>)

HJS031-PROTON.ESP

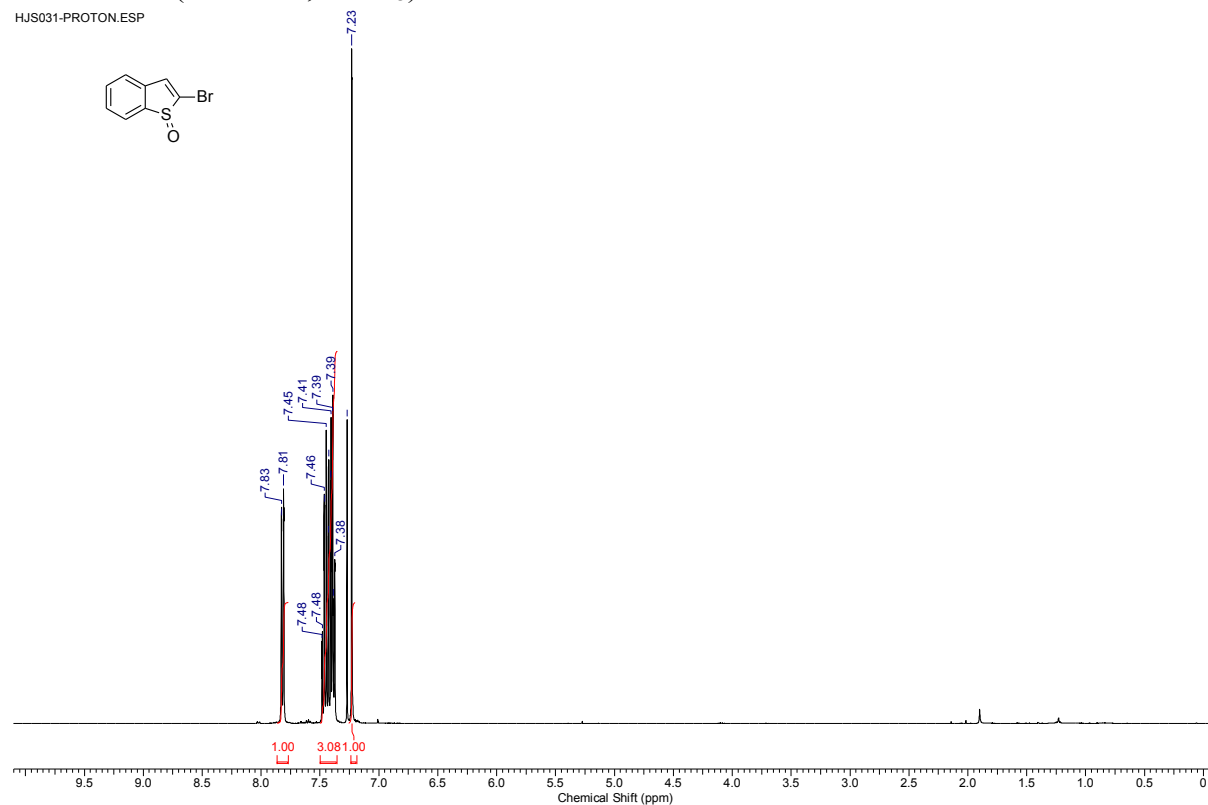

### 1e <sup>13</sup>C NMR (101 MHz, CDCl<sub>3</sub>)

HJS031-CARBON.ESP

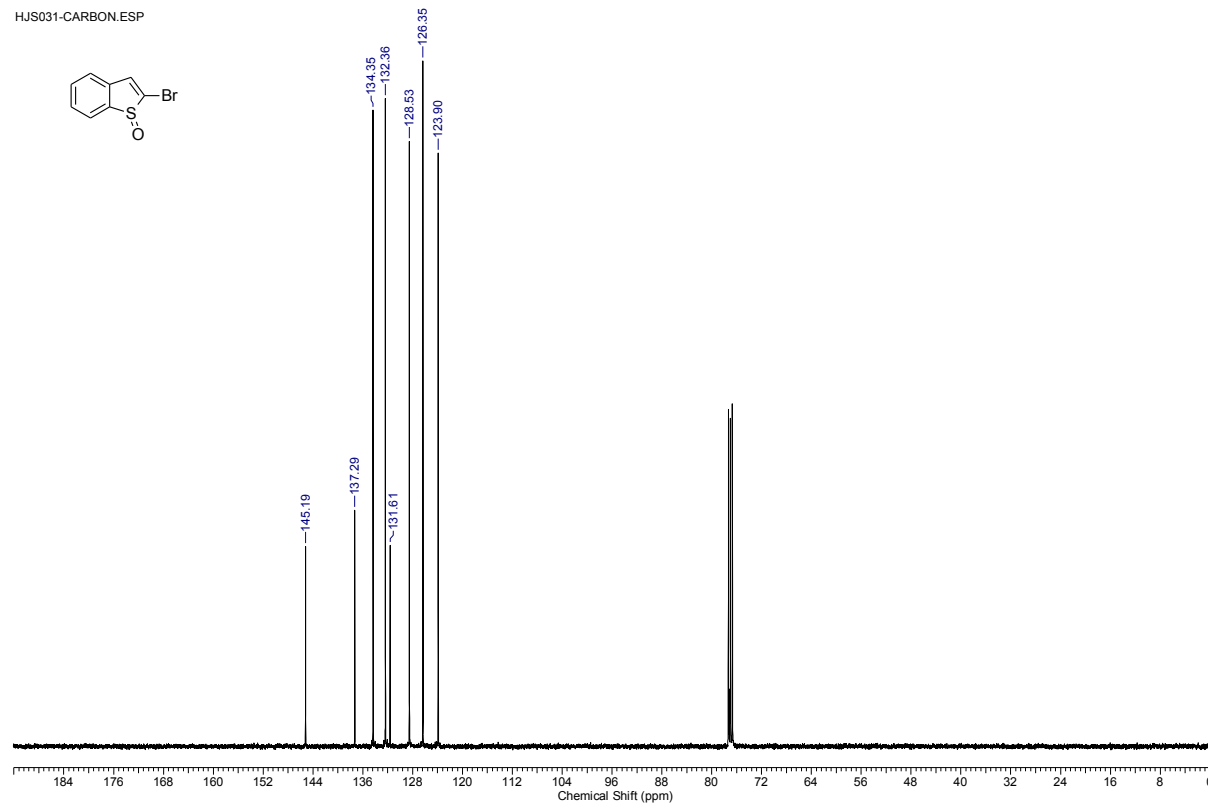

### Supplementary Figure 6.

**1f**  $^1\text{H}$  NMR (400 MHz,  $\text{CDCl}_3$ )

HJS205-PROTON.ESP

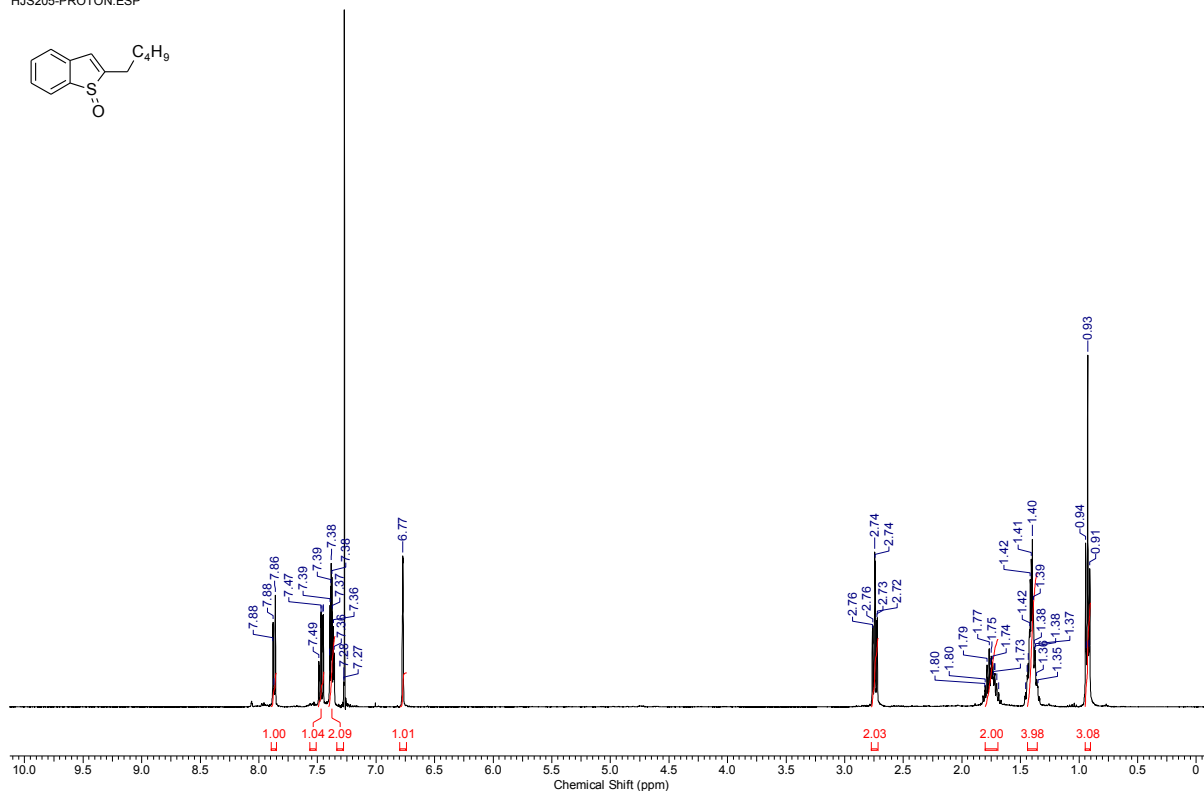

### **1f** $^{13}\text{C}$ NMR (101 MHz, $\text{CDCl}_3$ )

HJS205-CARBON.ESP

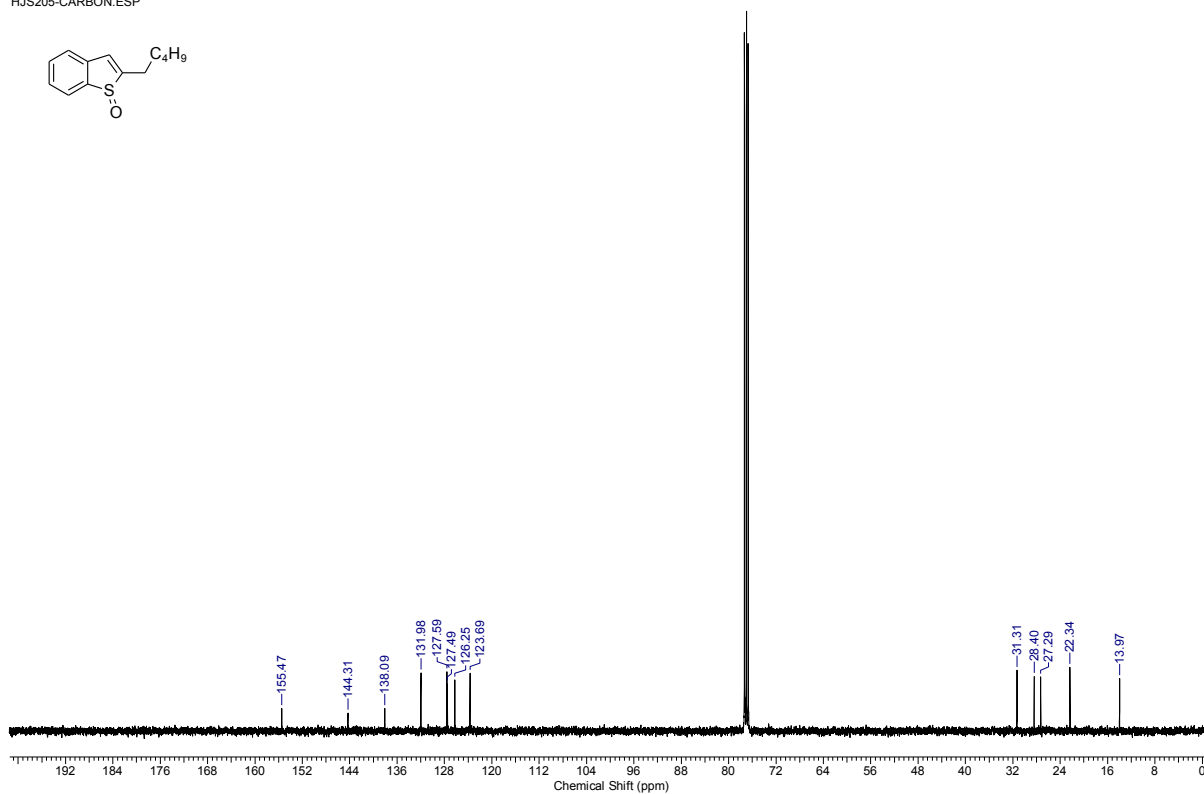

# Supplementary Figure 7.

## 1g <sup>1</sup>H NMR (400 MHz, CDCl<sub>3</sub>)

HJS036-03-PROTON.ESP

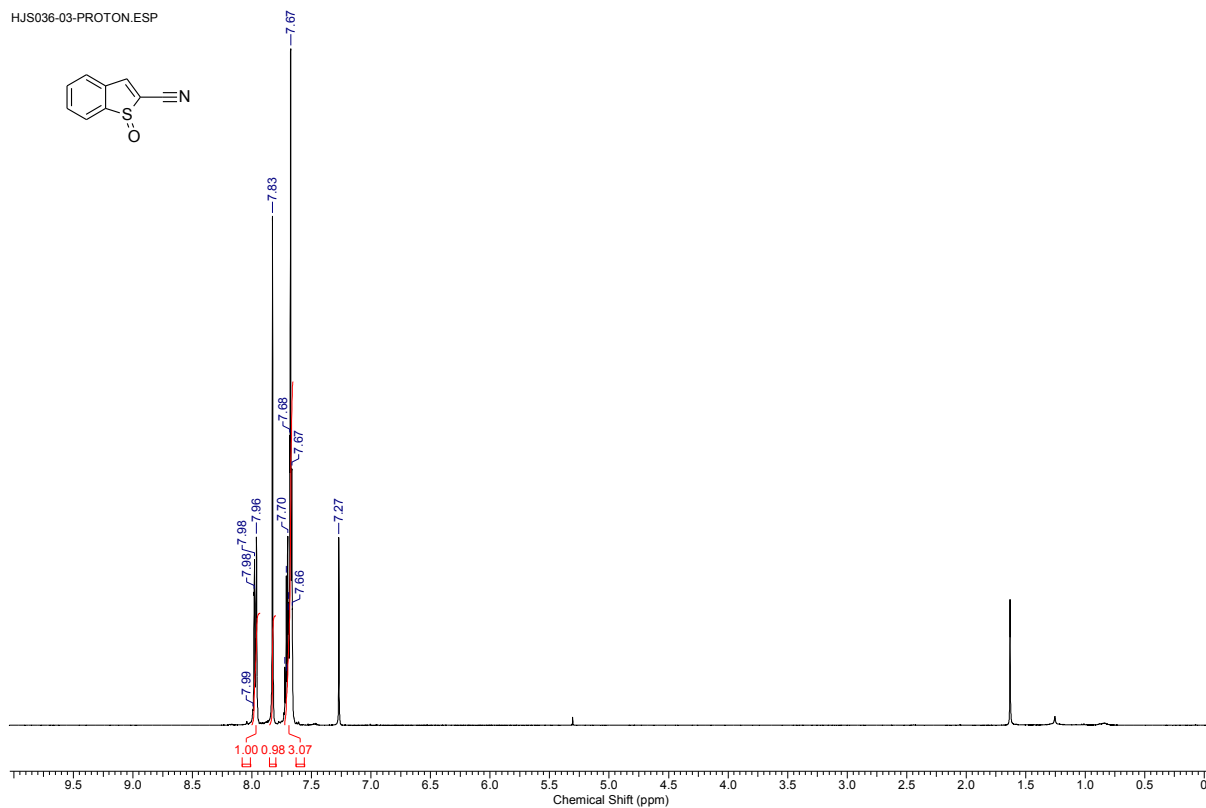

## 1g <sup>13</sup>C NMR (101 MHz, CDCl<sub>3</sub>)

HJS036-03-CARBON.ESP

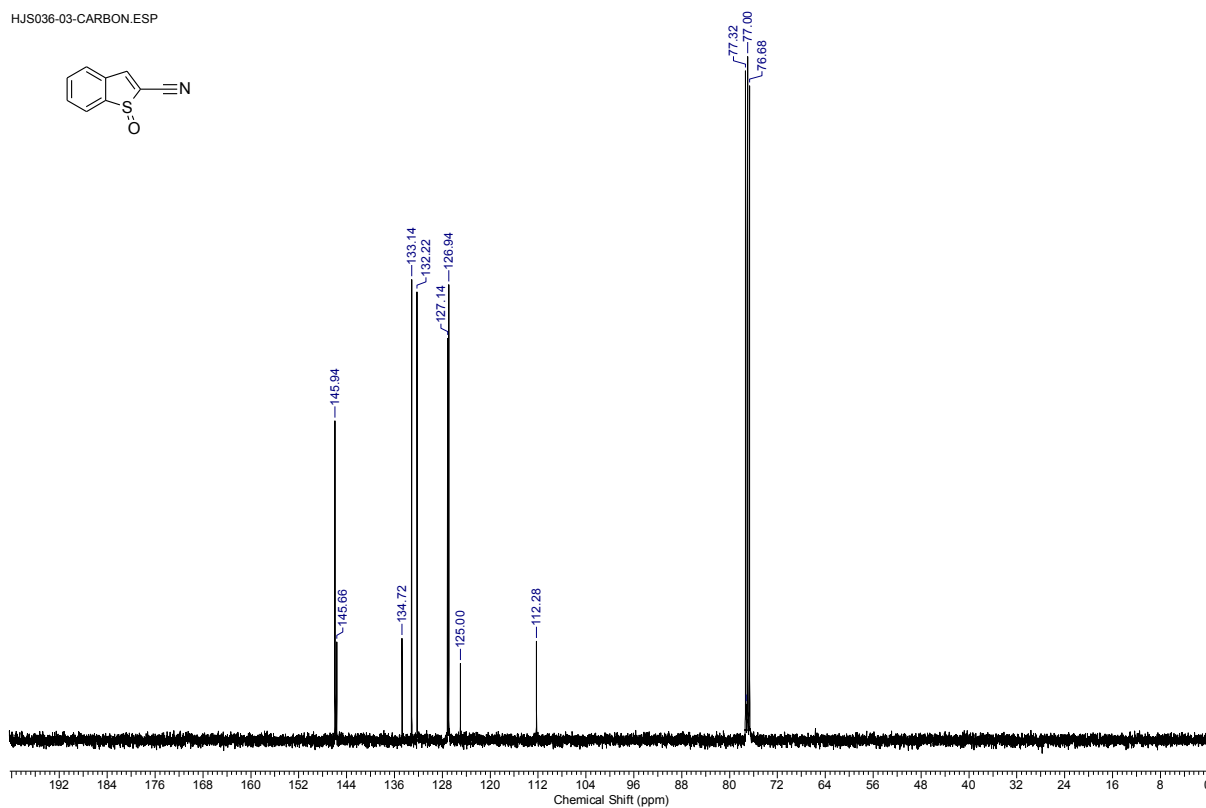

**Supplementary Figure 8.**  
**1h**  $^1\text{H}$  NMR (400 MHz,  $\text{CDCl}_3$ )

HJS008-04-PROTON.ESP

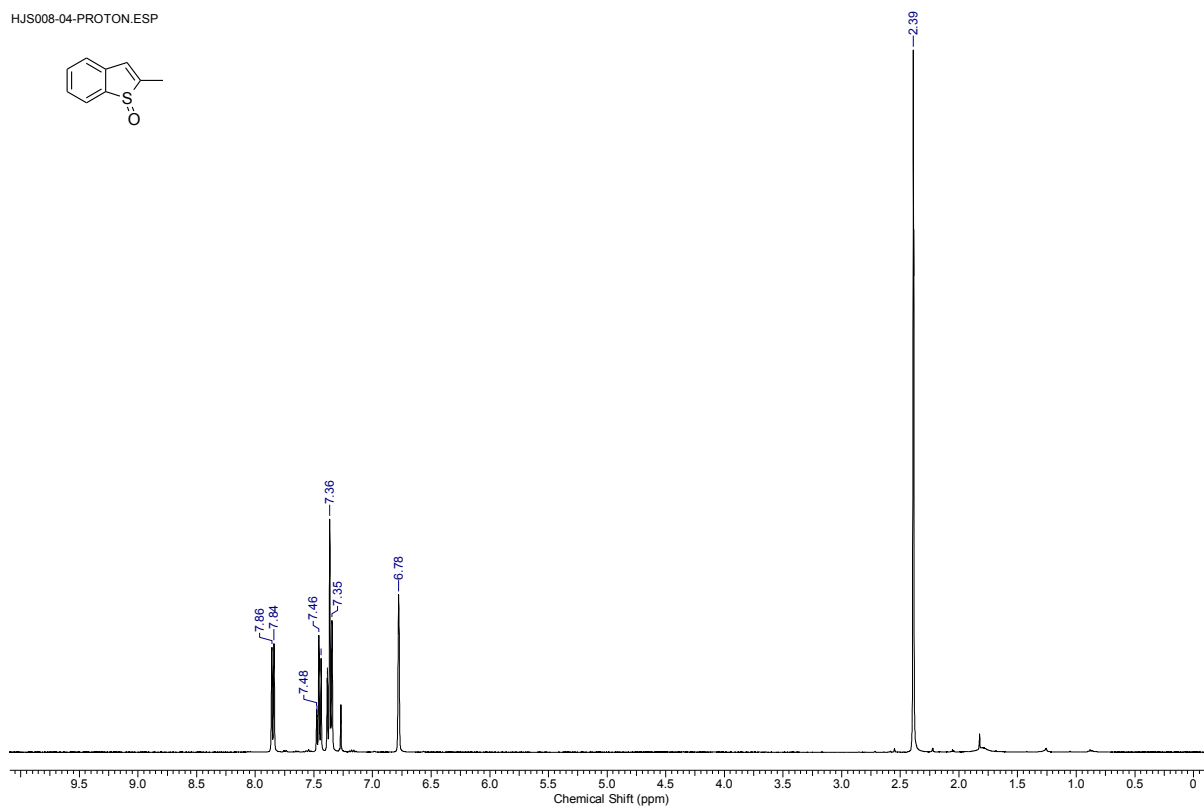

**1h**  $^{13}\text{C}$  NMR (101 MHz,  $\text{CDCl}_3$ )

HJS008-04-CARBON.ESP

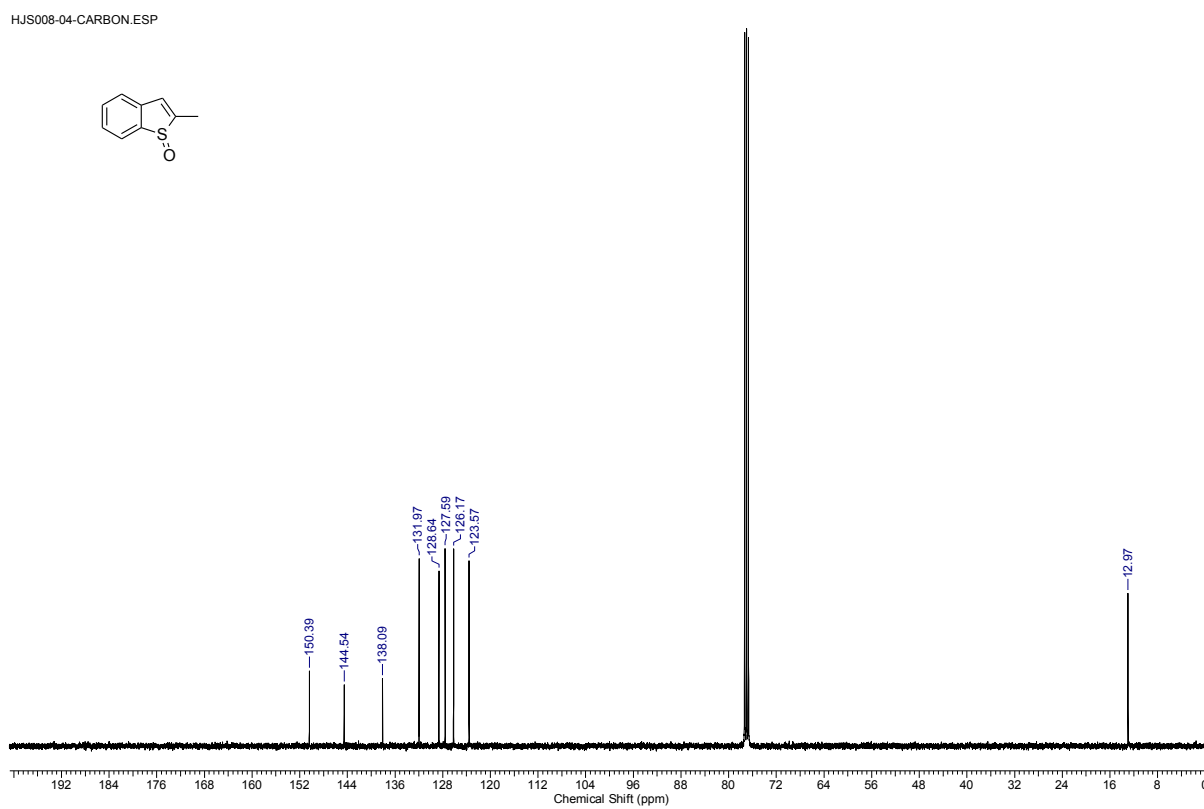

# Supplementary Figure 9.

## 1i <sup>1</sup>H NMR (400 MHz, CDCl<sub>3</sub>)

HJS199-03-PROTON.ESP

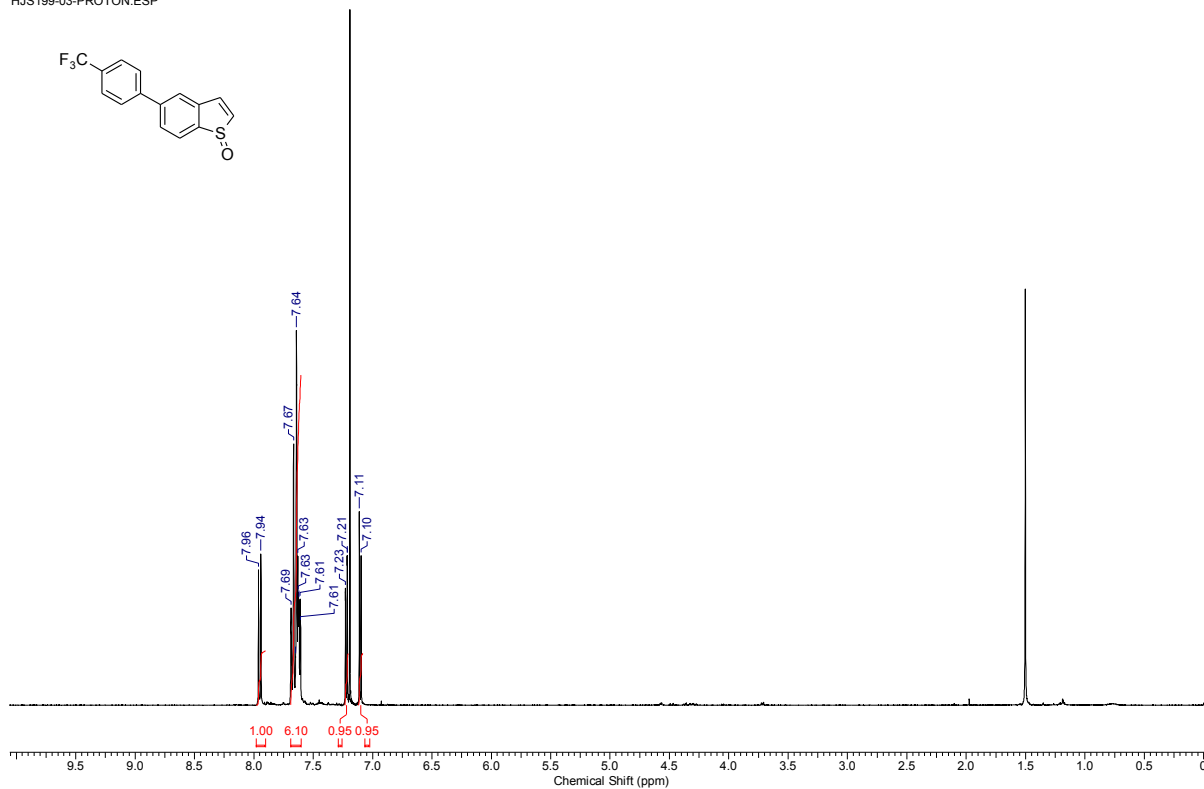

## 1i <sup>13</sup>C NMR (101 MHz, CDCl<sub>3</sub>)

HJS199-03-Carbon.esp

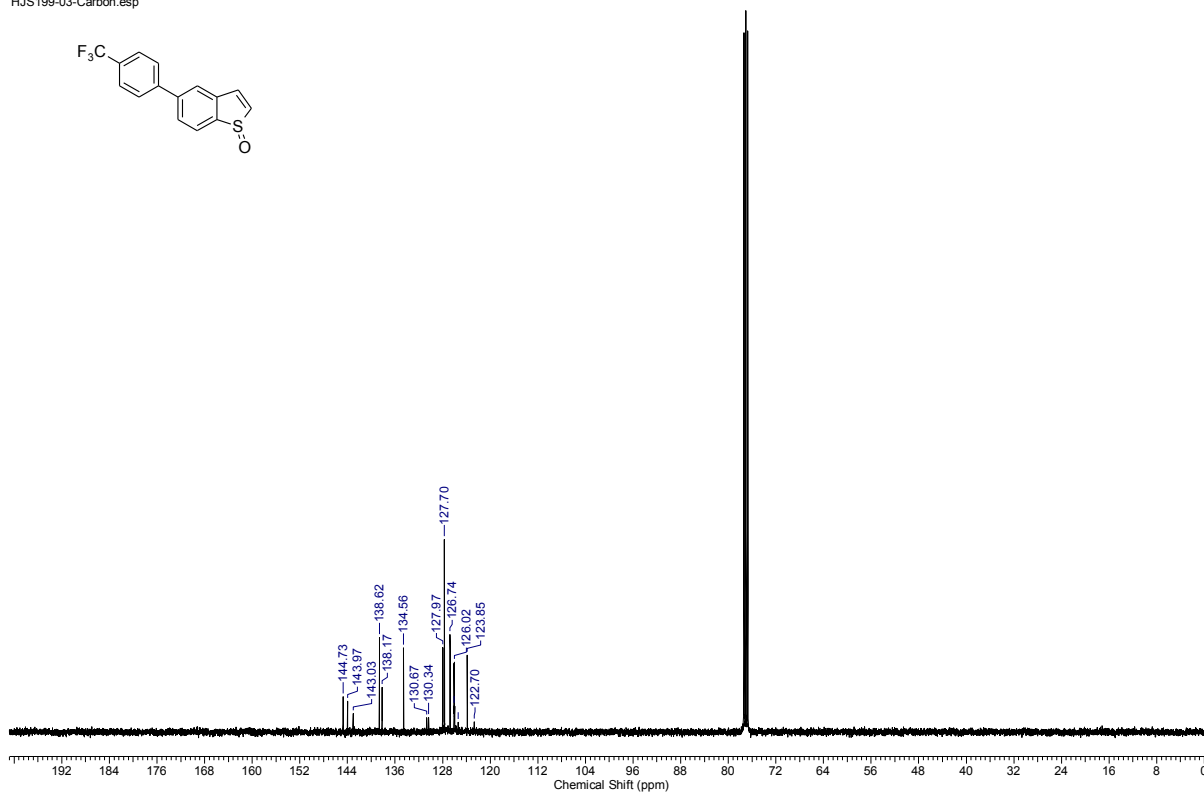

**Supplementary Figure 10.**  
**3a**  $^1\text{H}$  NMR (400 MHz,  $\text{CDCl}_3$ )

HJS150-PROTON.ESP

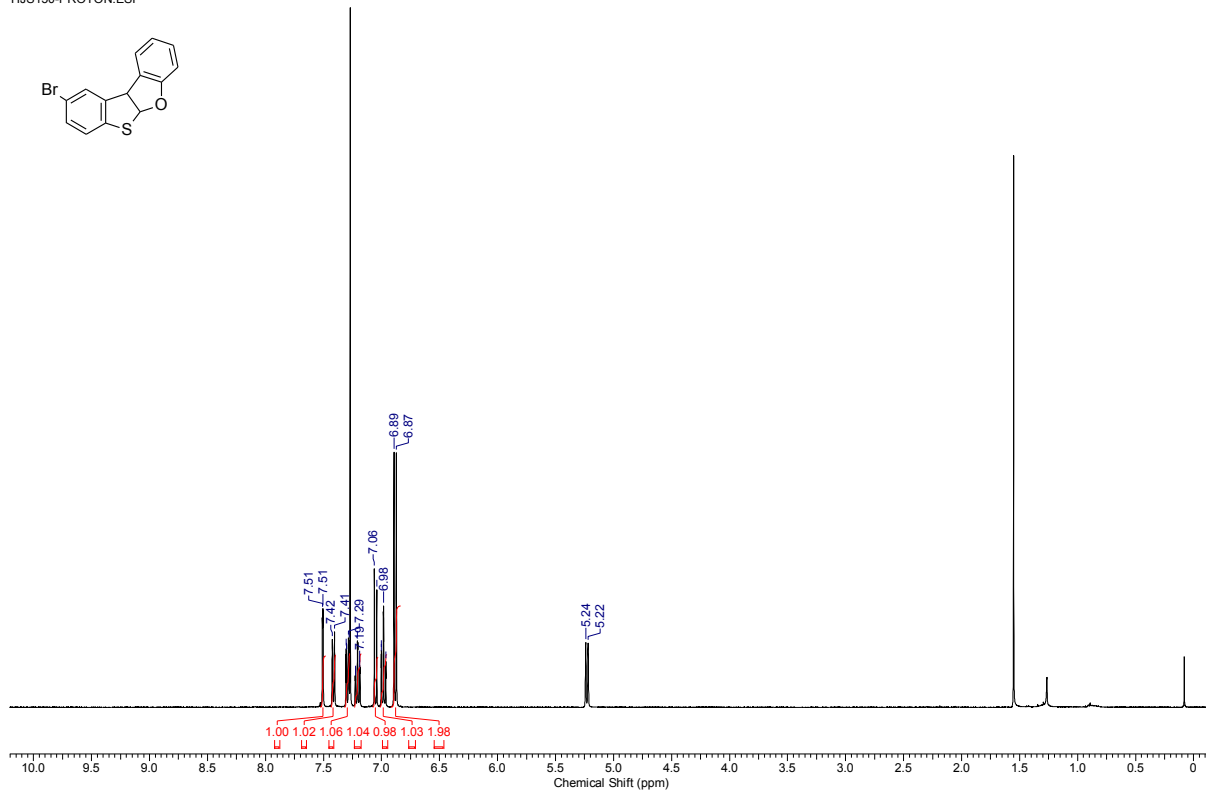

**3a**  $^{13}\text{C}$  NMR (101 MHz,  $\text{CDCl}_3$ )

HJS150-CARBON.ESP

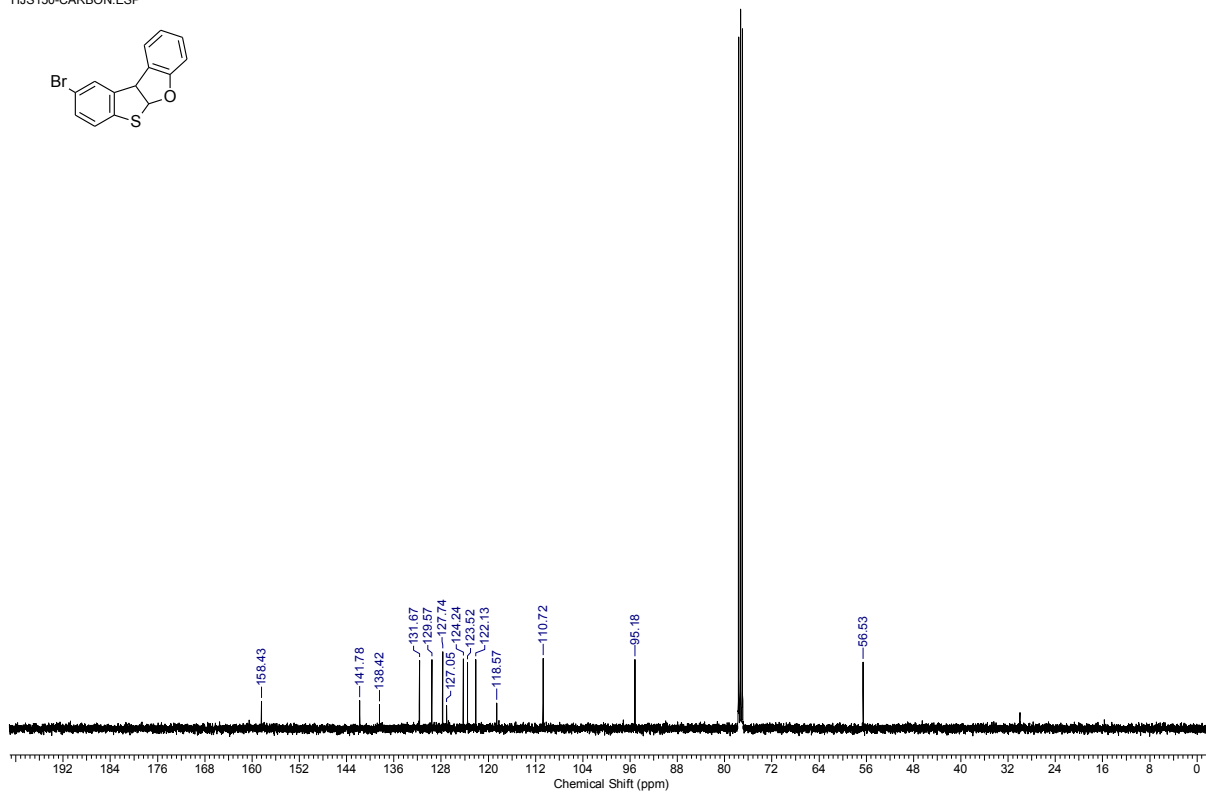

### Supplementary Figure 11.

#### 4a <sup>1</sup>H NMR (400 MHz, CDCl<sub>3</sub>)

20161013-1814-B400\_B,11-7.010.001.1r.esp

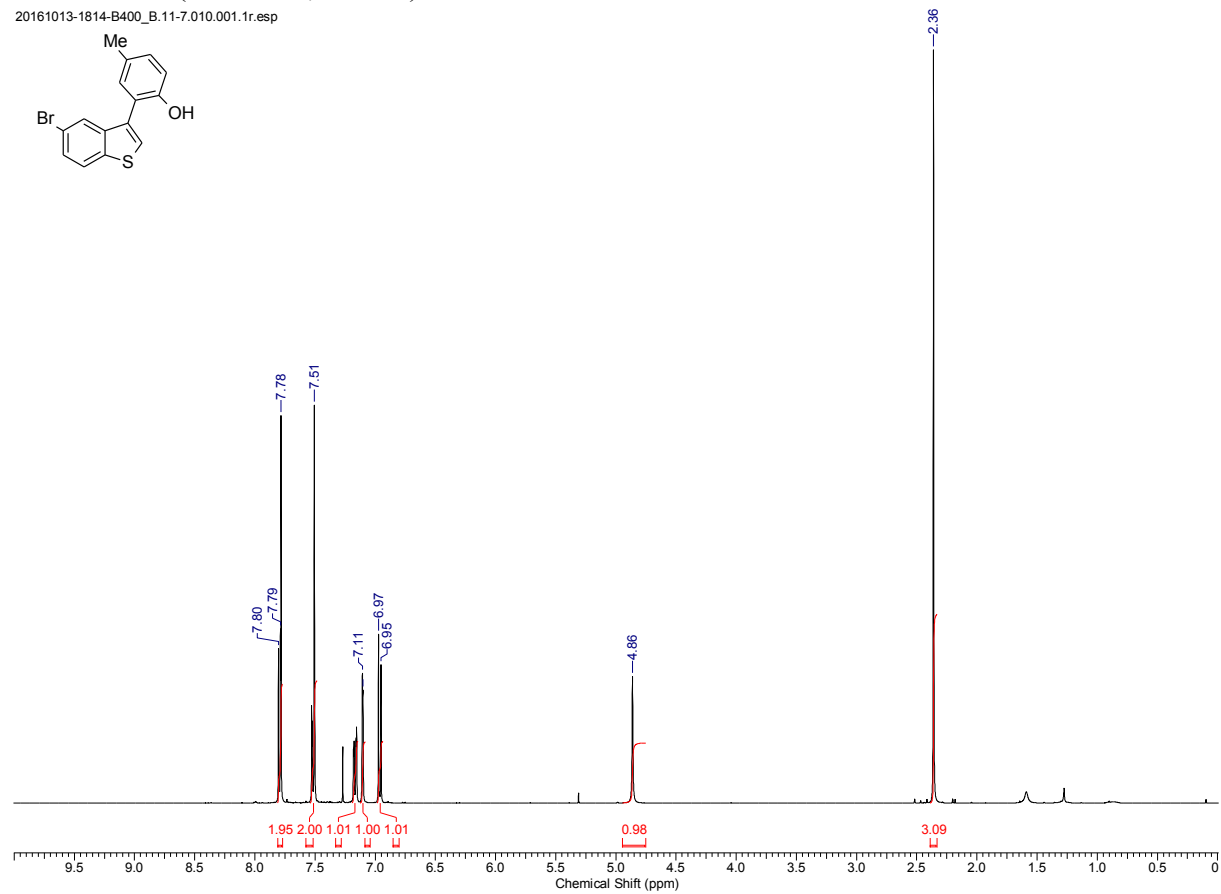

#### 4a <sup>13</sup>C NMR (101 MHz, CDCl<sub>3</sub>)

20161013-1814-B400\_B,11-7.011.001.1r.esp

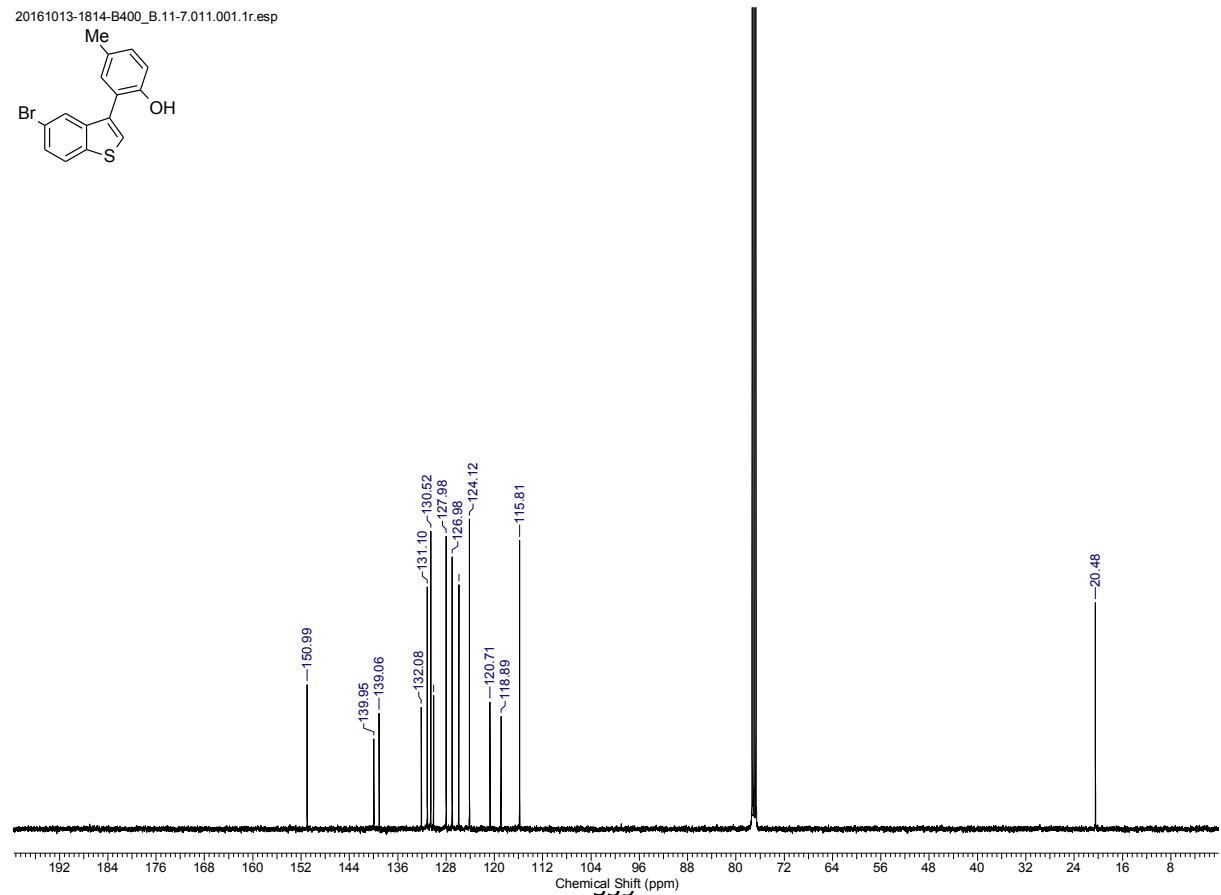

### Supplementary Figure 12.

#### 4b <sup>1</sup>H NMR (400 MHz, CDCl<sub>3</sub>)

20161013-1812-B400\_B.12-52.010.001.1r.esp

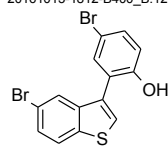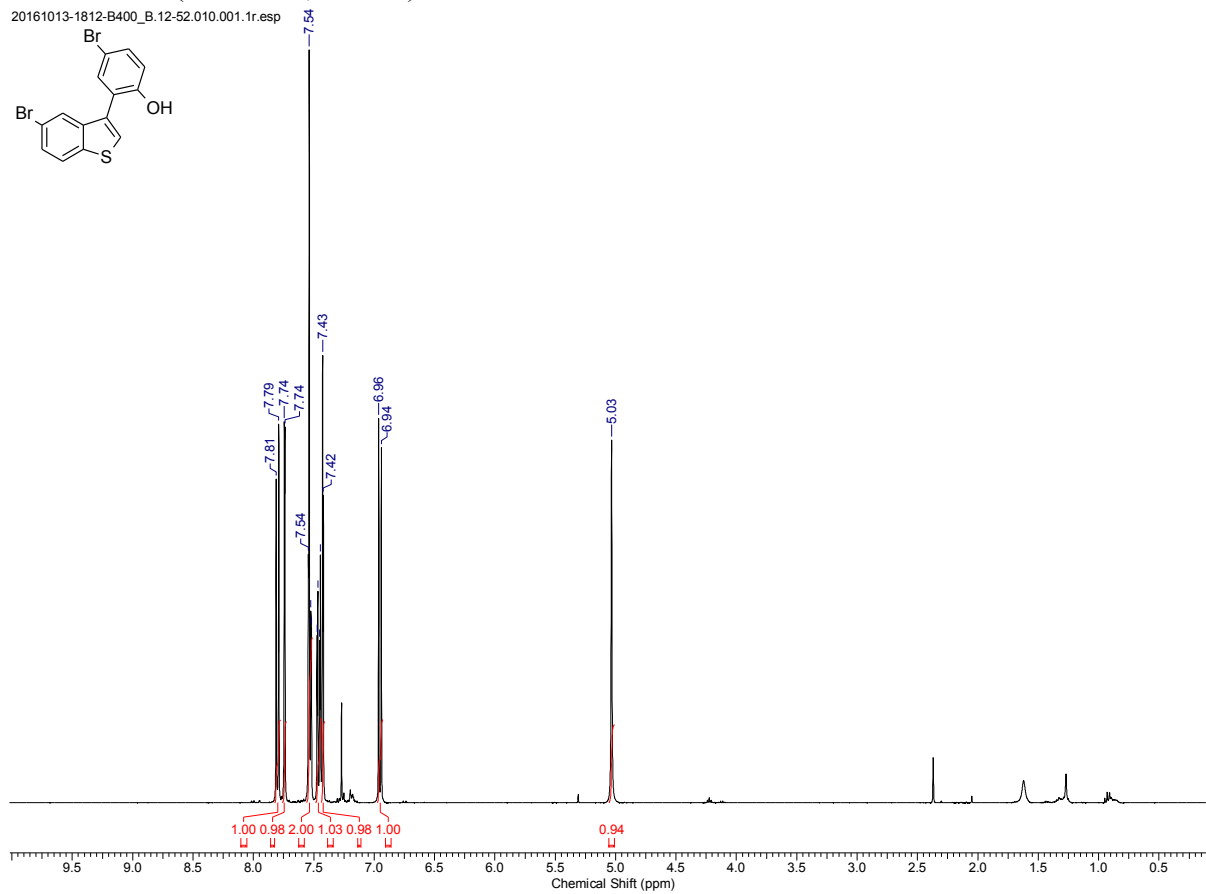

#### 4b <sup>13</sup>C NMR (101 MHz, CDCl<sub>3</sub>)

20161013-1812-B400\_B.12-52.012.001.1r.esp

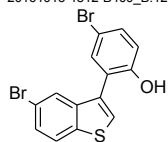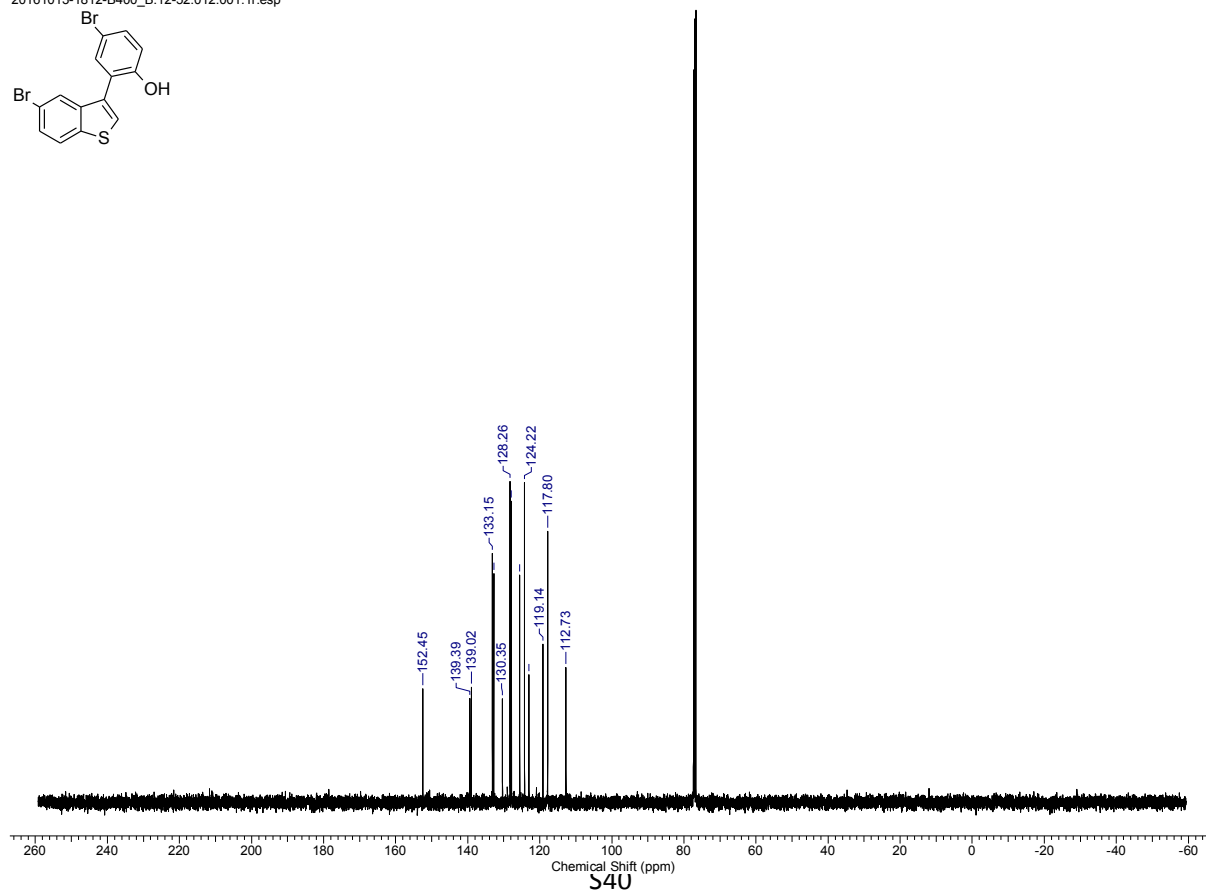



### Supplementary Figure 13.

#### 4c <sup>1</sup>H NMR (400 MHz, CDCl<sub>3</sub>)

20161010-1725-B500\_B.11-18.010.001.1r.esp

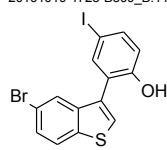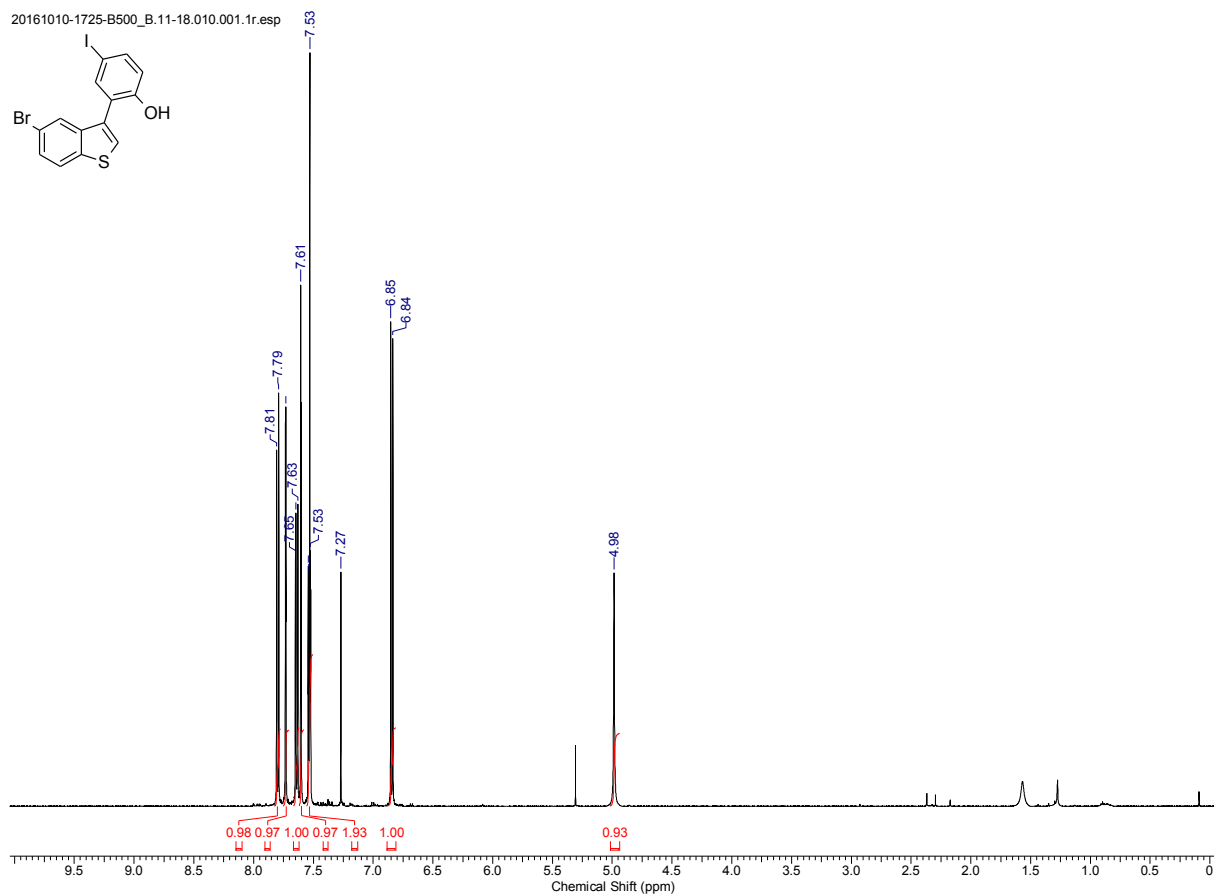

#### 4c <sup>13</sup>C NMR (101 MHz, CDCl<sub>3</sub>)

20161010-1725-B500\_B.11-18.012.001.1r.esp

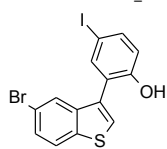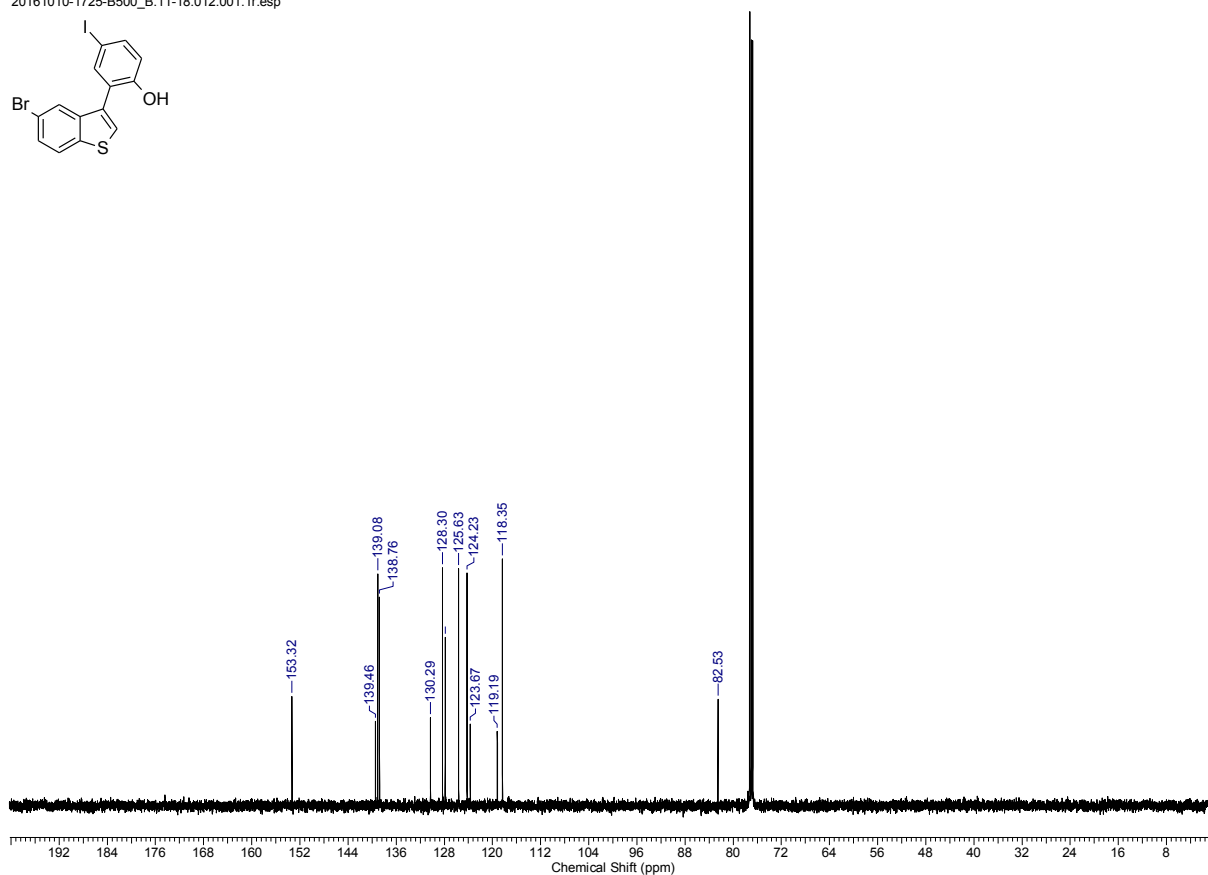

### Supplementary Figure 14.

#### 4d <sup>1</sup>H NMR (400 MHz, CDCl<sub>3</sub>)

20161017-1756-B500\_B.14-12.010.001.1r.esp

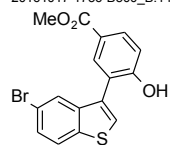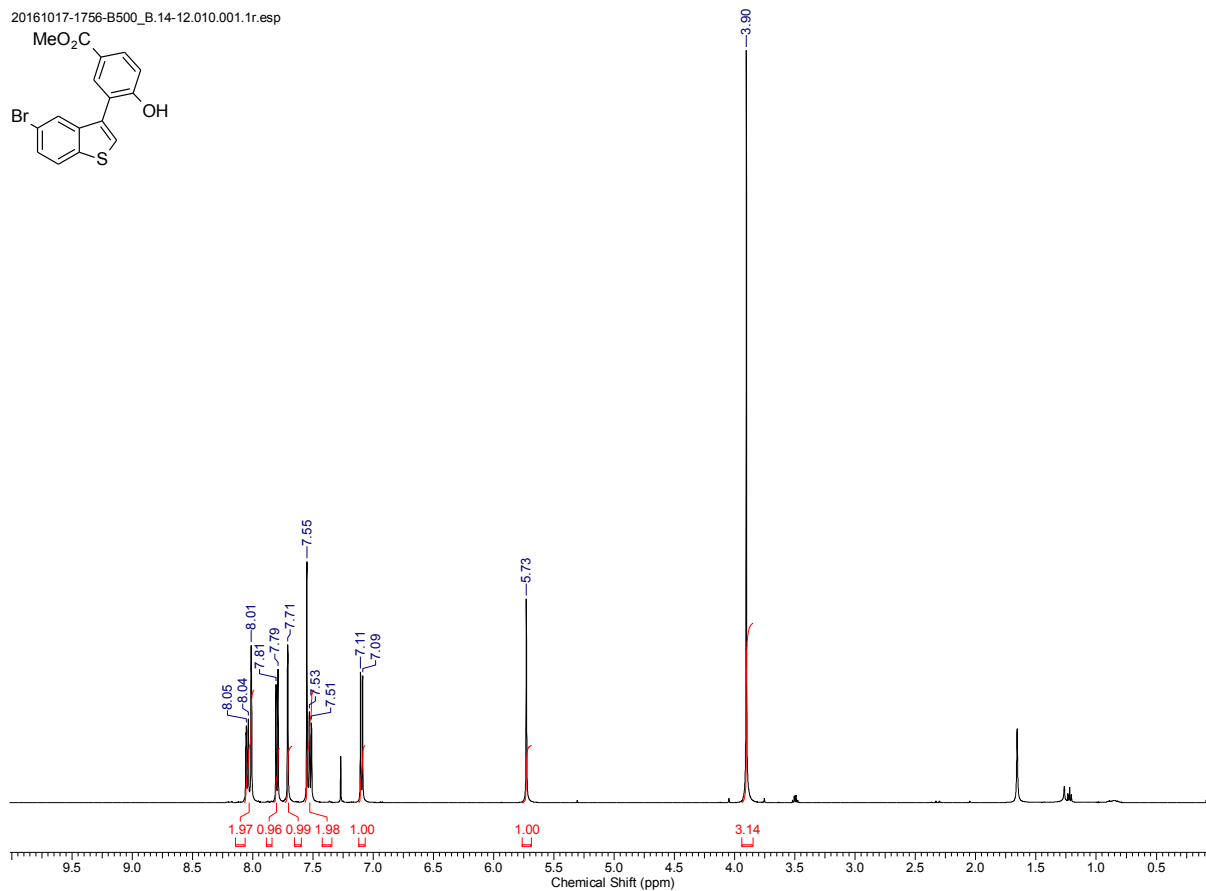

#### 4d <sup>13</sup>C NMR (101 MHz, CDCl<sub>3</sub>)

20161017-1756-B500\_B.14-12.011.001.1r.esp

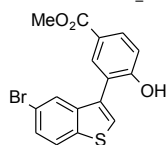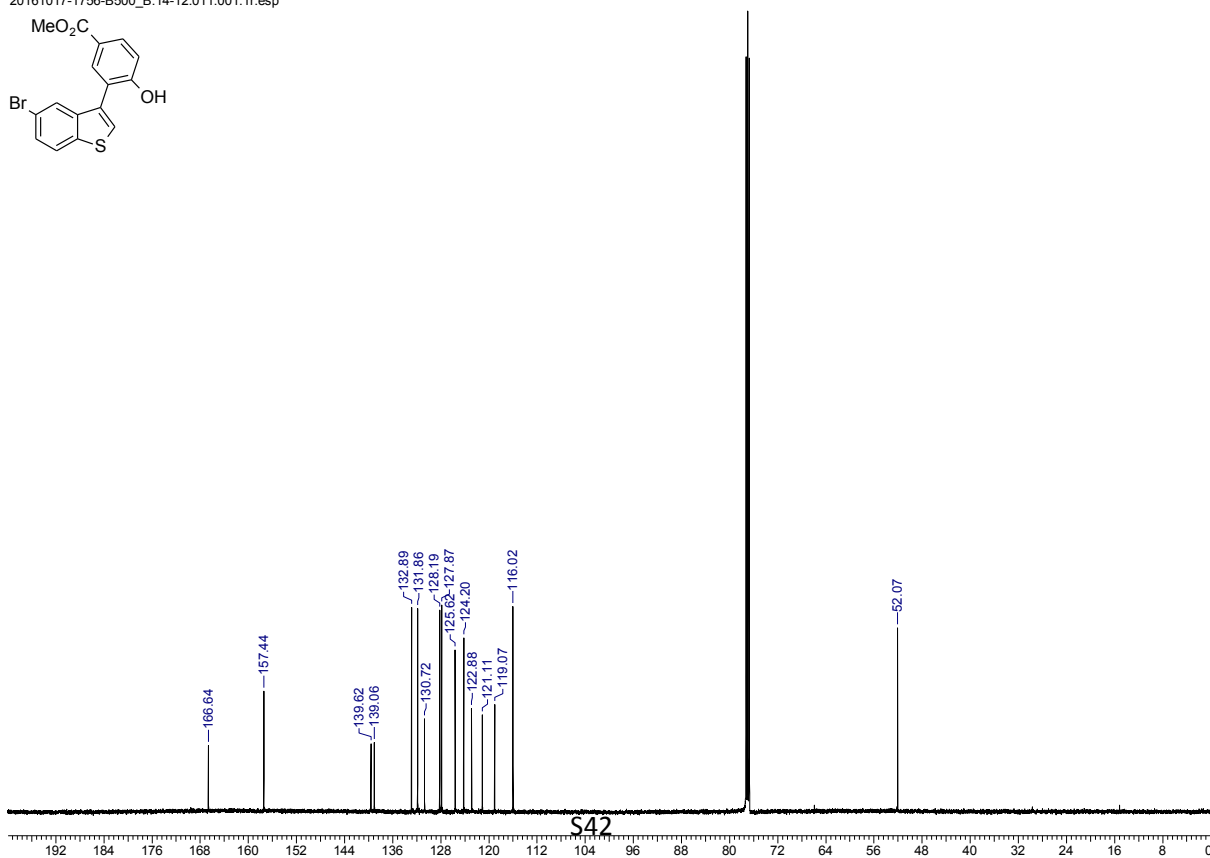

### Supplementary Figure 15.

#### 4e <sup>1</sup>H NMR (400 MHz, CDCl<sub>3</sub>)

20160907-1111-B400\_B.11-39.010.001.1r.esp

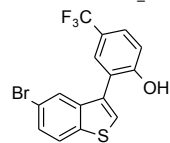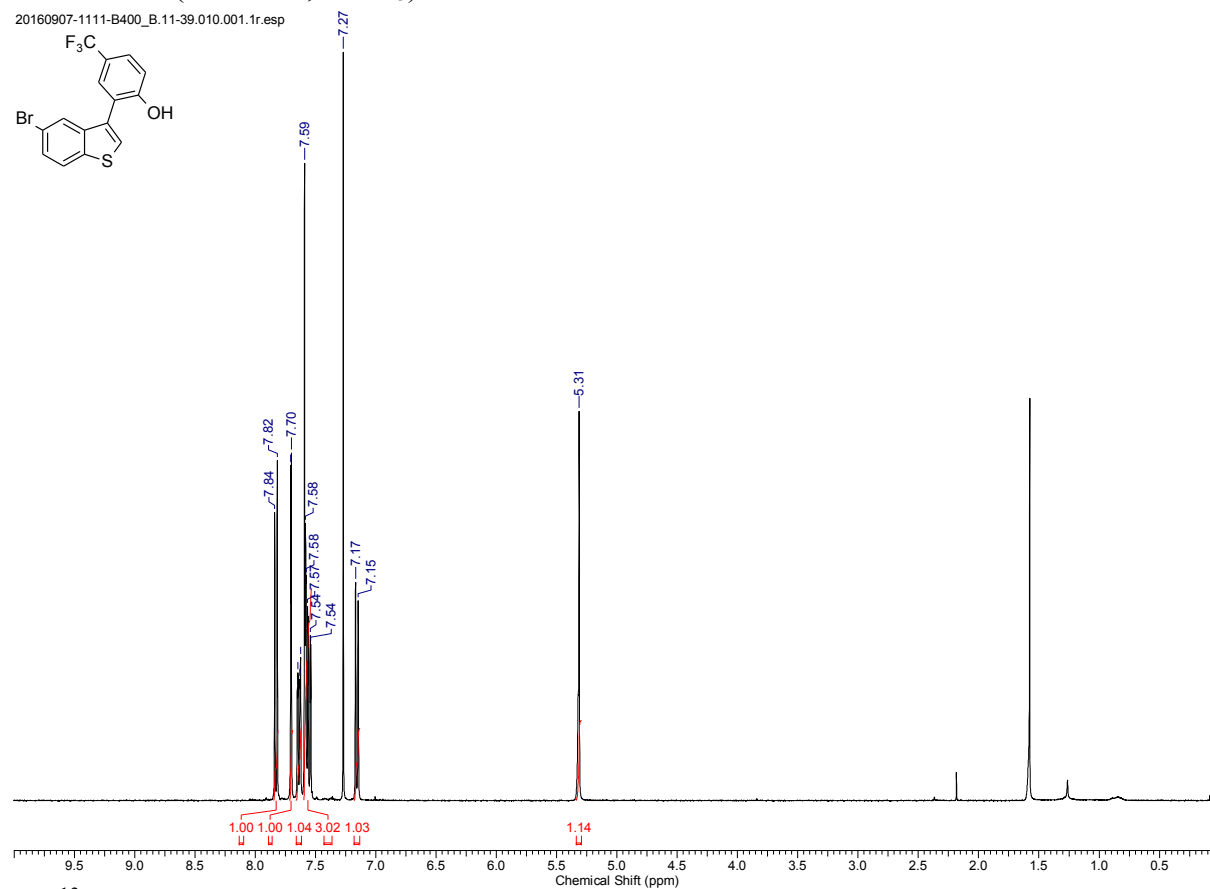

#### 4e <sup>13</sup>C NMR (101 MHz, CDCl<sub>3</sub>)

20161020-1813-B400\_B.11-47.011.001.1r.esp

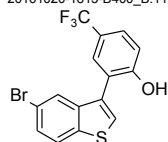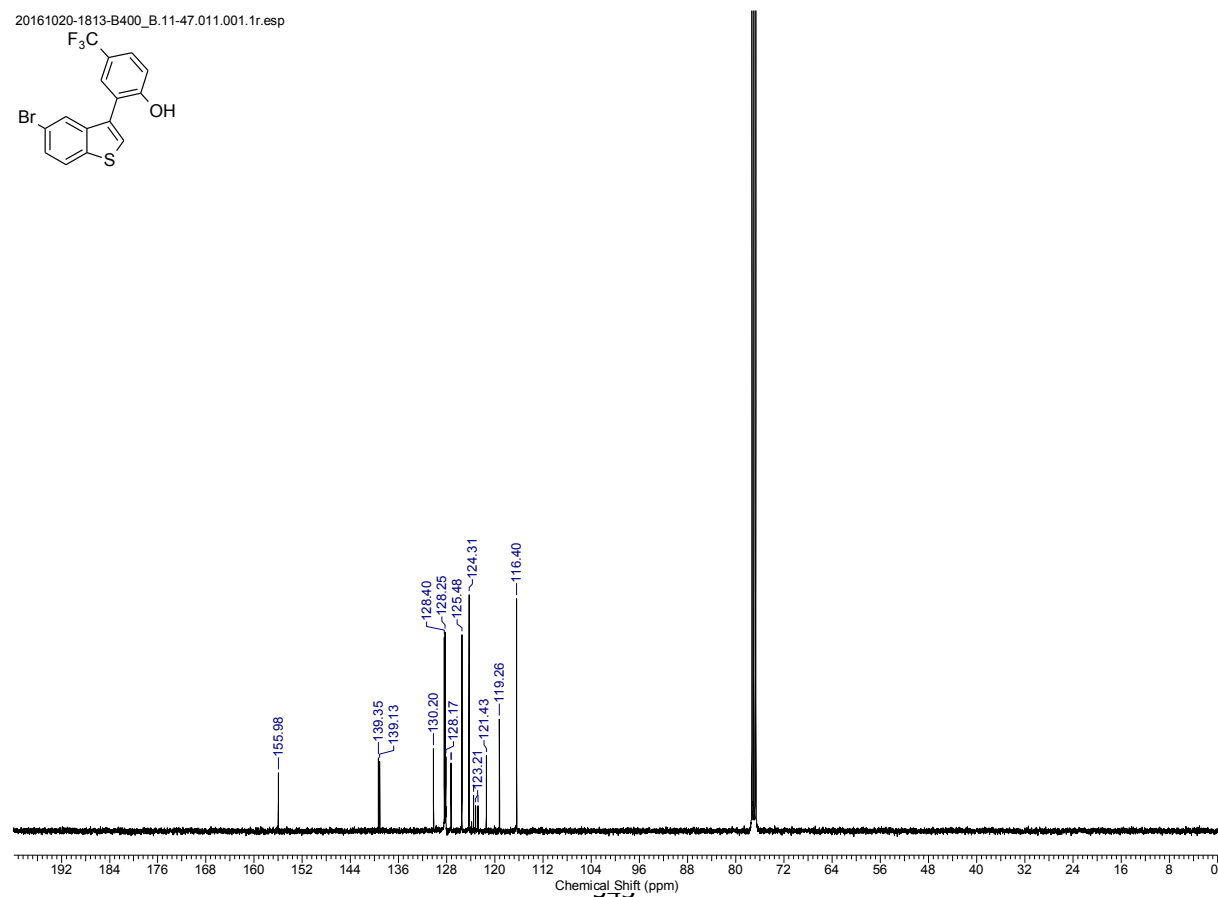

### Supplementary Figure 16.

#### 4f <sup>1</sup>H NMR (400 MHz, CDCl<sub>3</sub>)

20161010-1722-B400\_B.11-29.010.001.1r.esp

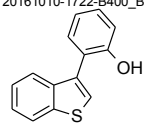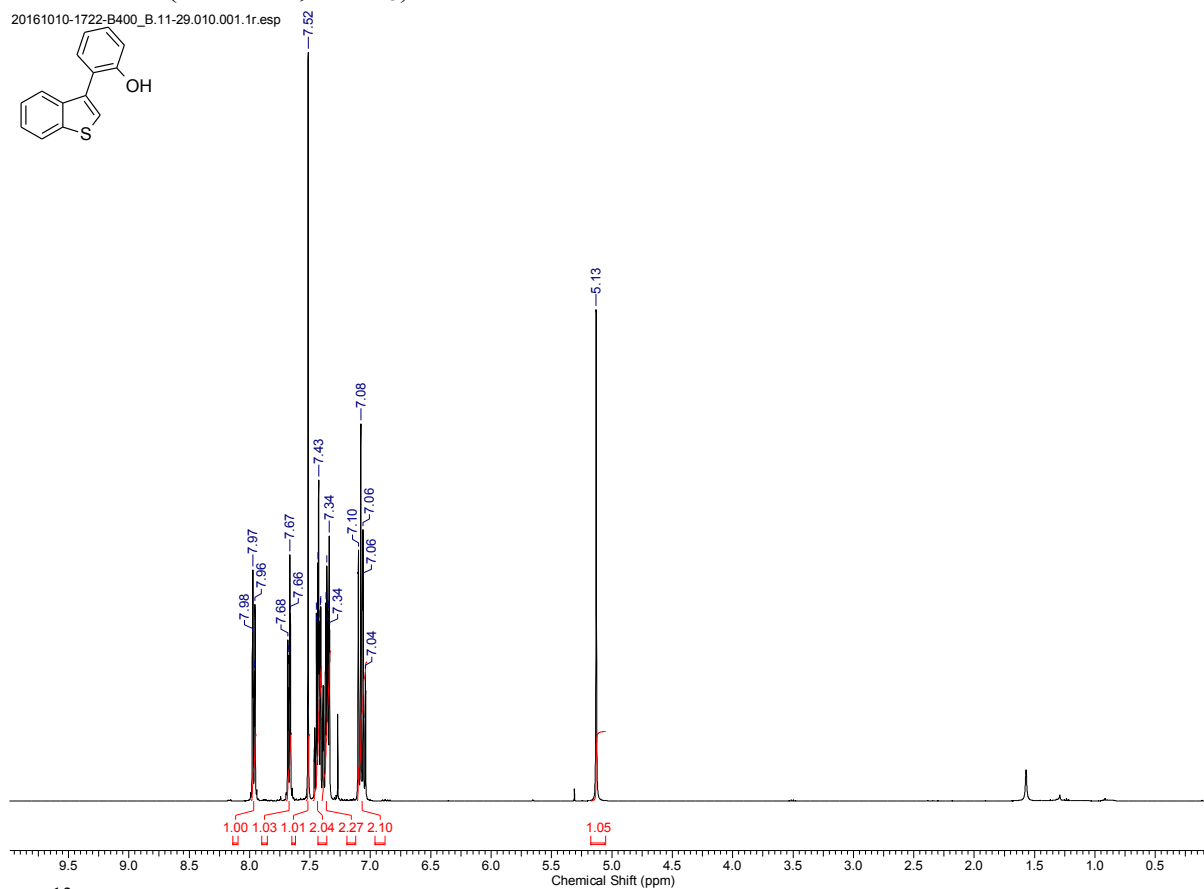

#### 4f <sup>13</sup>C NMR (101 MHz, CDCl<sub>3</sub>)

20161010-1722-B400\_B.11-29.011.001.1r.esp

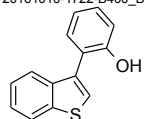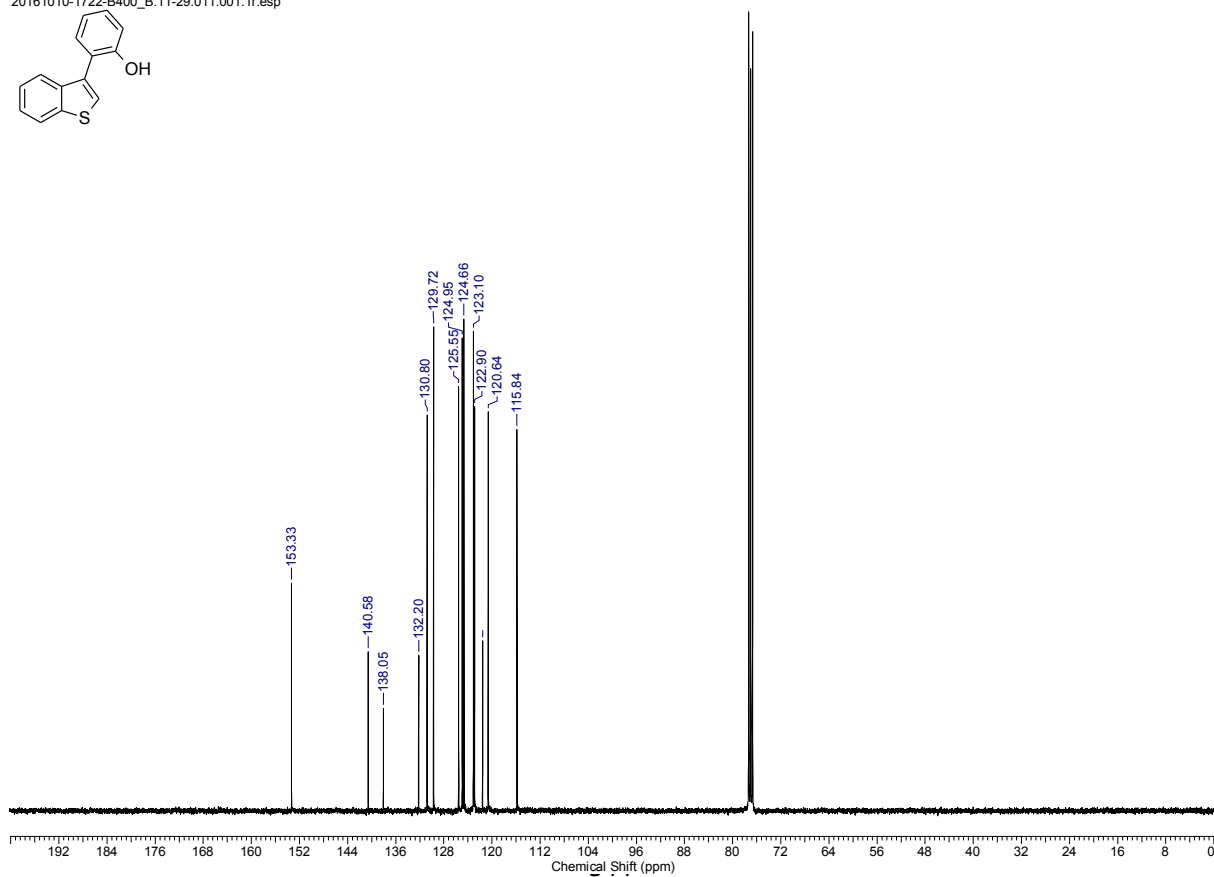

### Supplementary Figure 17.

### 4g <sup>1</sup>H NMR (400 MHz, CDCl<sub>3</sub>)

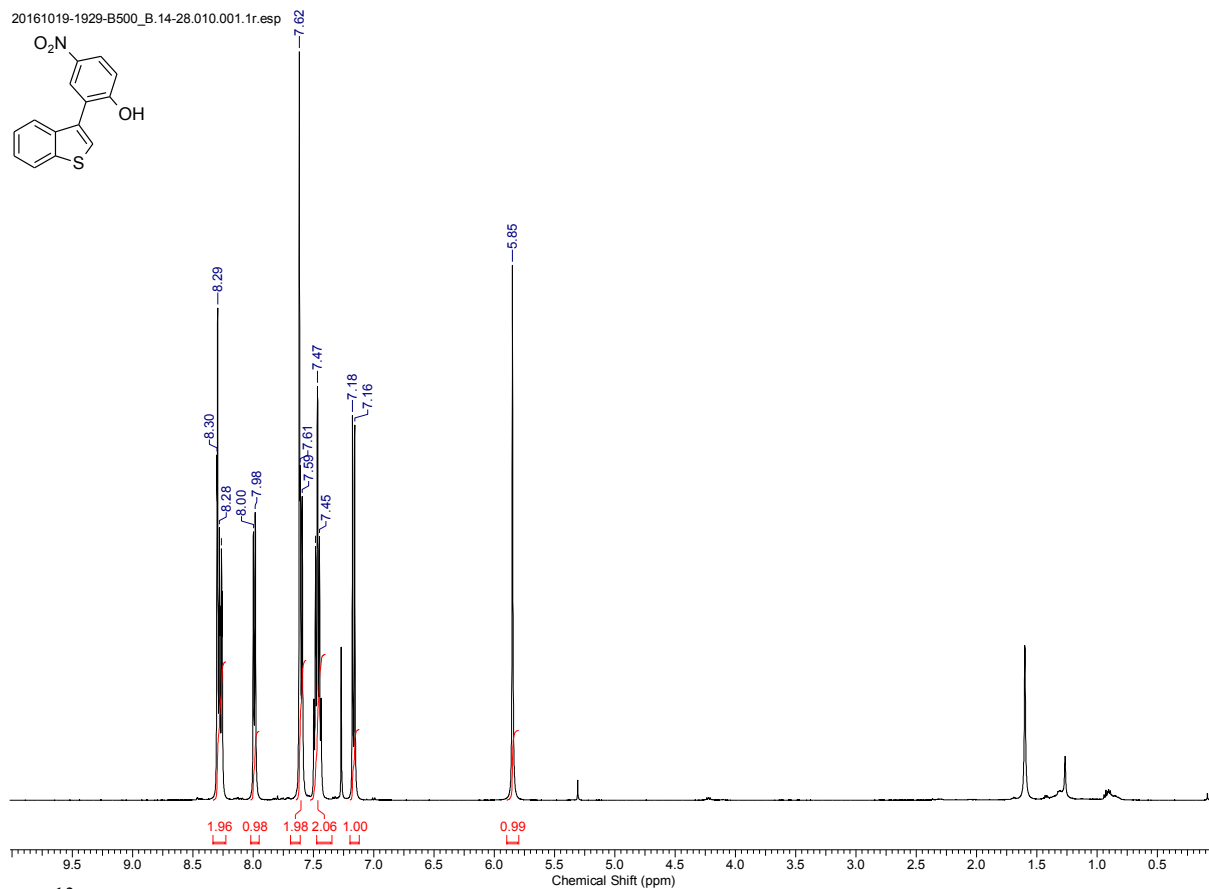

### 4g <sup>13</sup>C NMR (101 MHz, CDCl<sub>3</sub>)

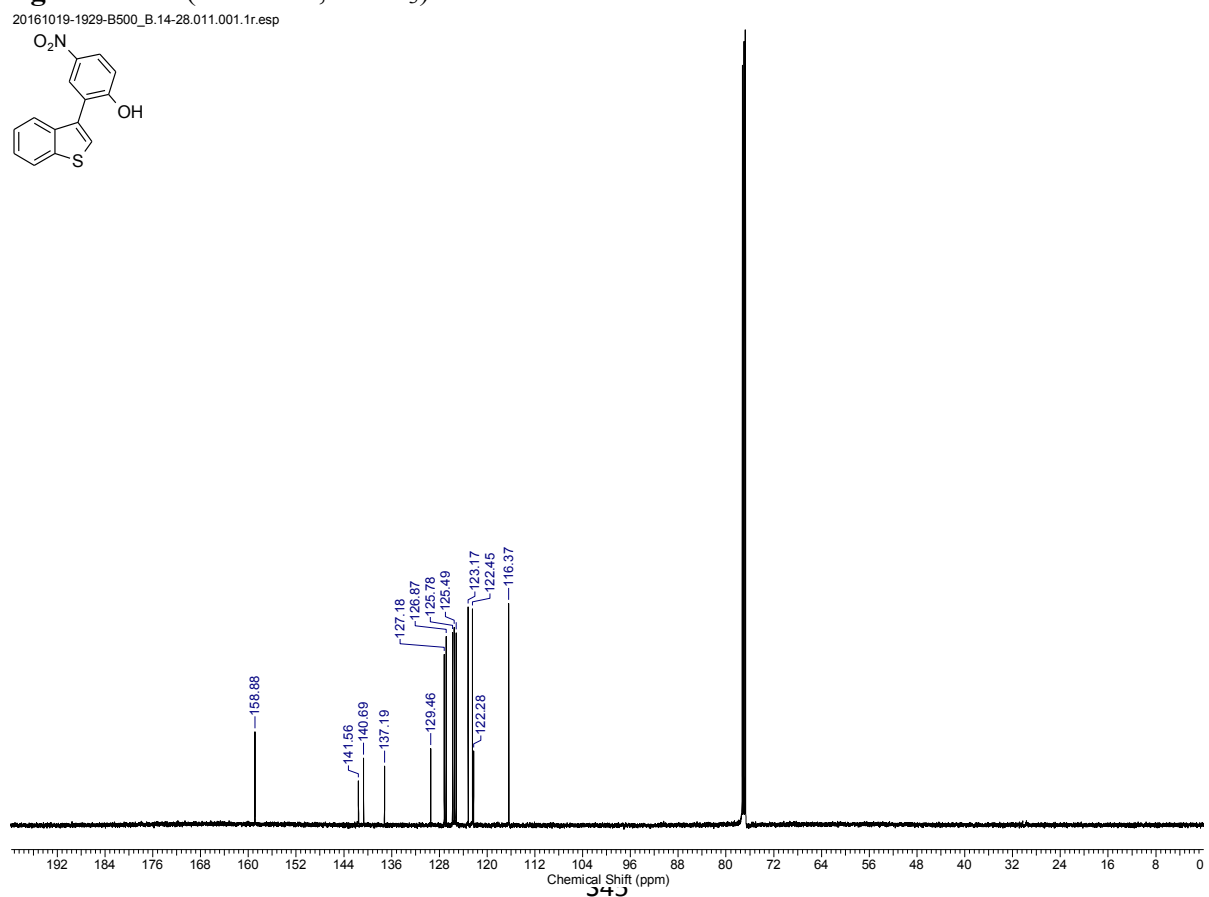

### Supplementary Figure 18.

#### 4h <sup>1</sup>H NMR (400 MHz, CDCl<sub>3</sub>)

20161012-1712-B500\_B.14-43.010.001.1r.esp

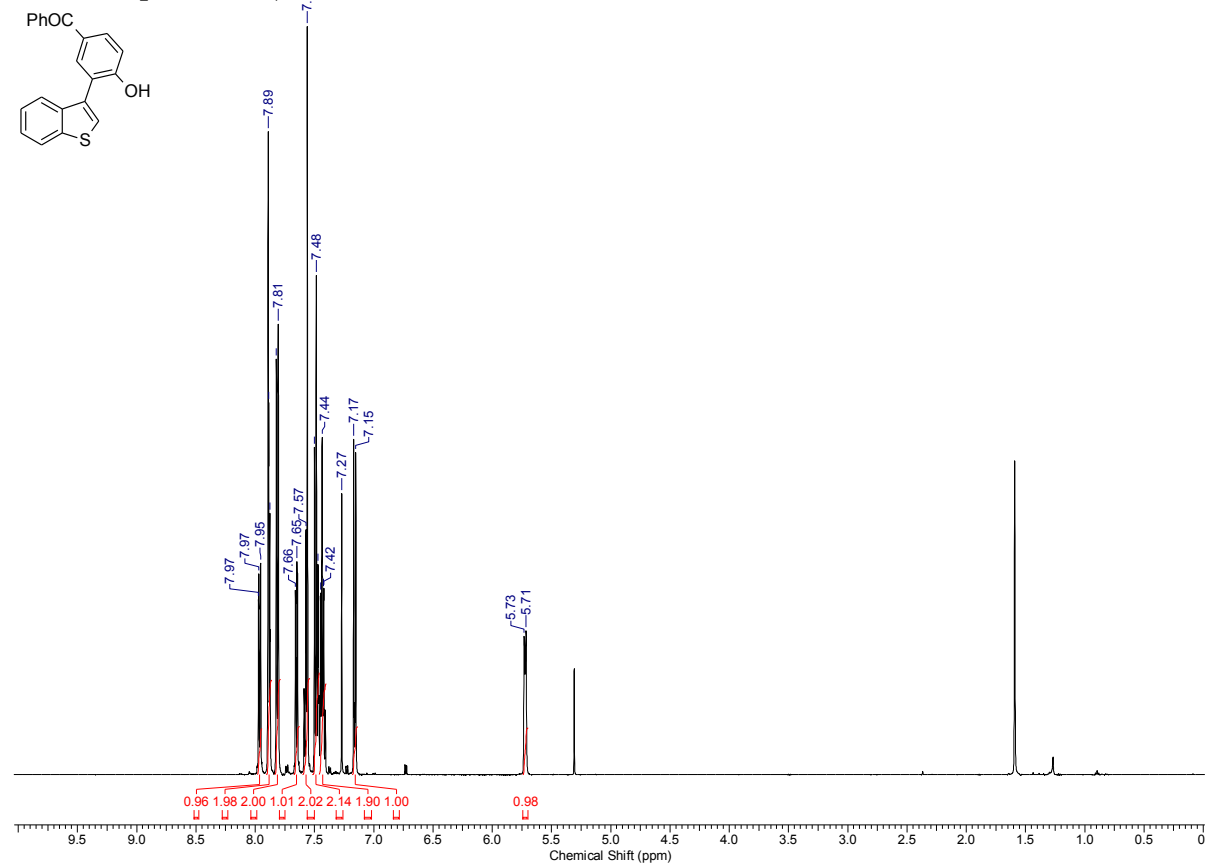

#### 4h <sup>13</sup>C NMR (101 MHz, CDCl<sub>3</sub>)

20161012-1712-B500\_B.14-43.011.001.1r.esp

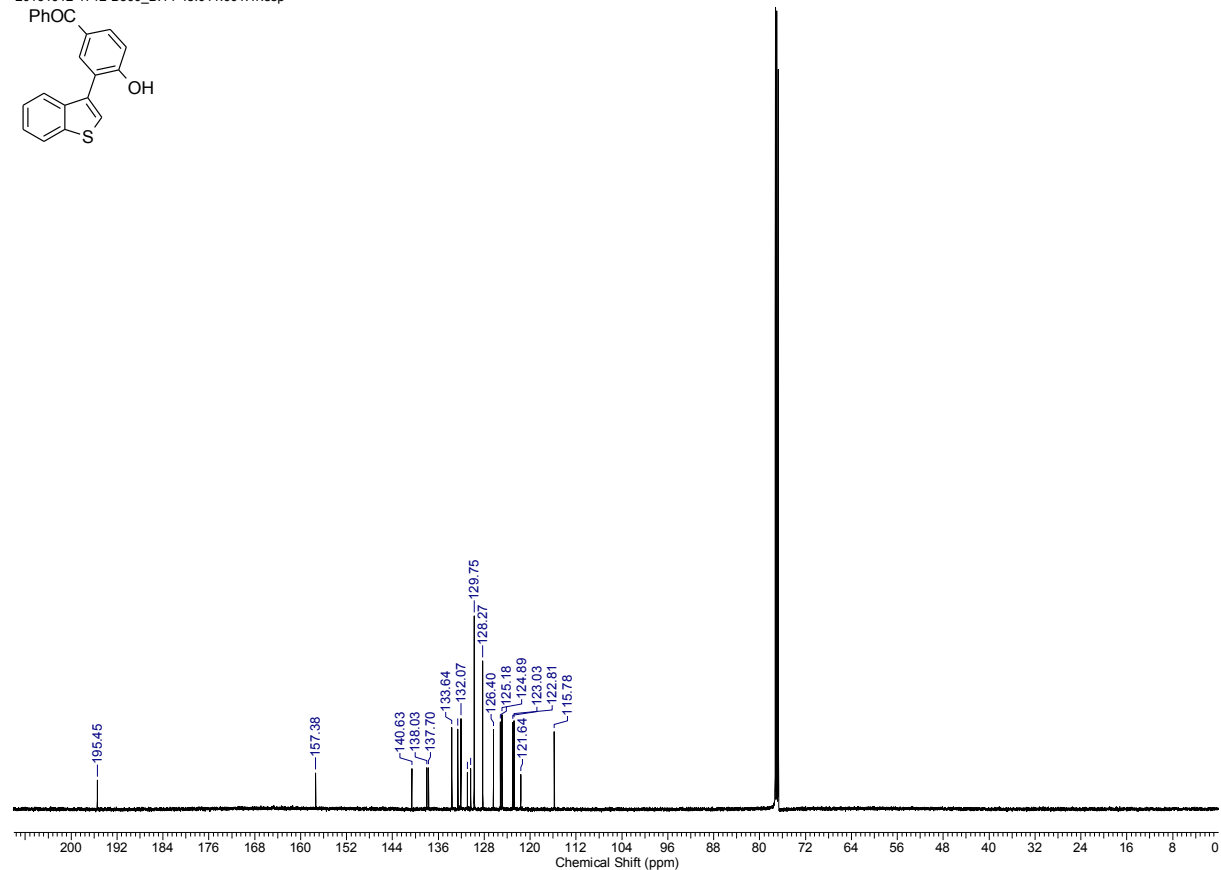

### Supplementary Figure 19.

#### 4i <sup>1</sup>H NMR (400 MHz, CDCl<sub>3</sub>)

20161013-1813-B400\_B.11-6.010.001.1r.esp

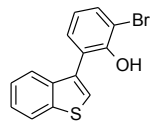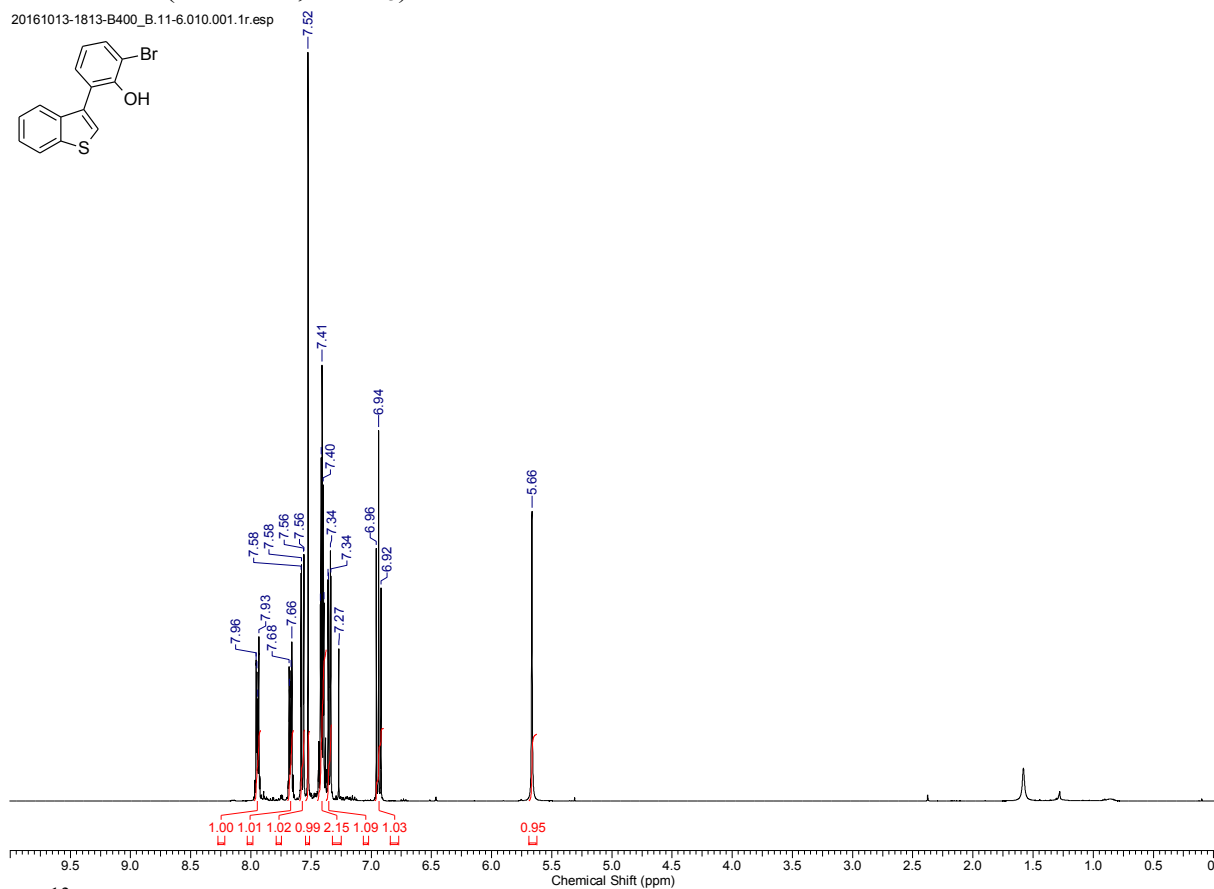

#### 4i <sup>13</sup>C NMR (101 MHz, CDCl<sub>3</sub>)

20161013-1813-B400\_B.11-6.011.001.1r.esp

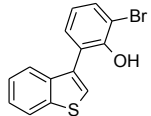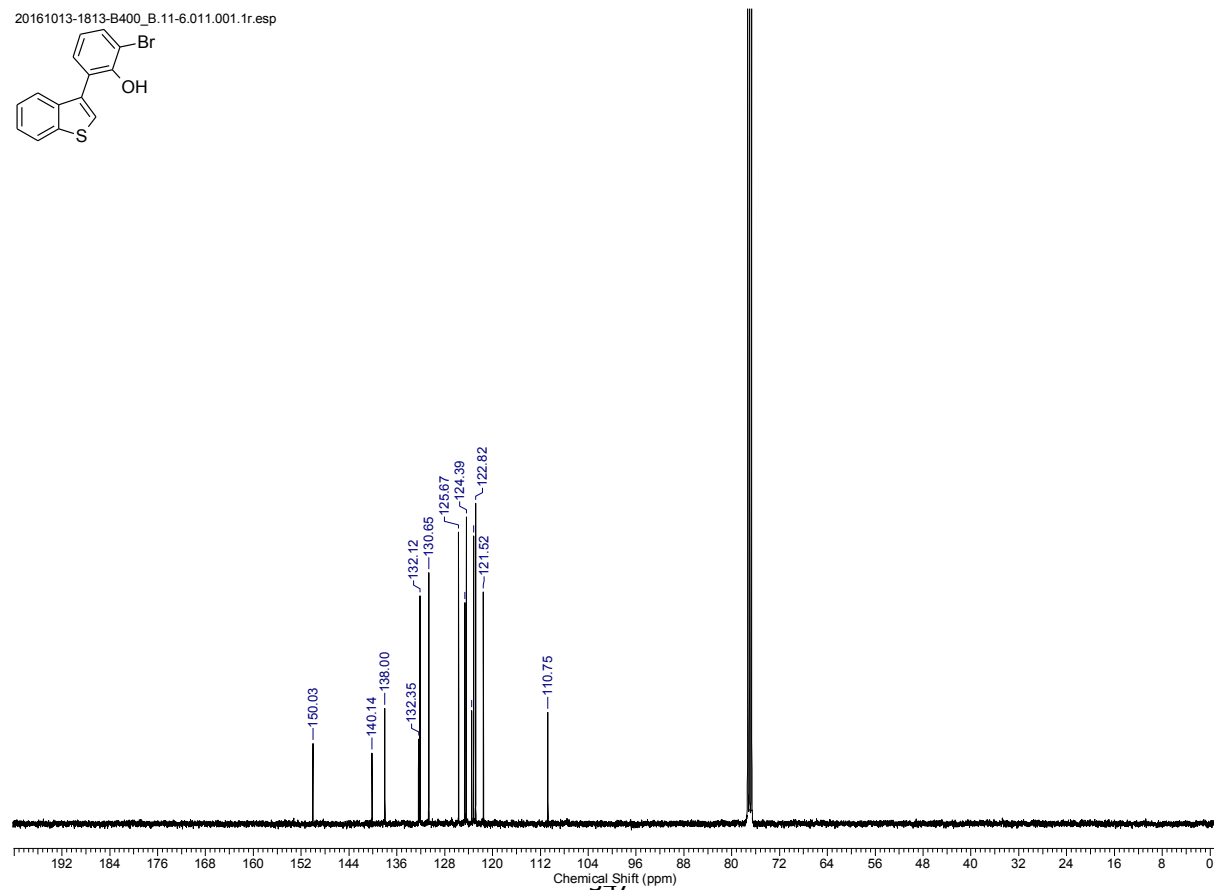

### Supplementary Figure 20.

#### 4j <sup>1</sup>H NMR (400 MHz, CDCl<sub>3</sub>)

20161013-1810-B400\_B.12-51.010.001.1R.esp

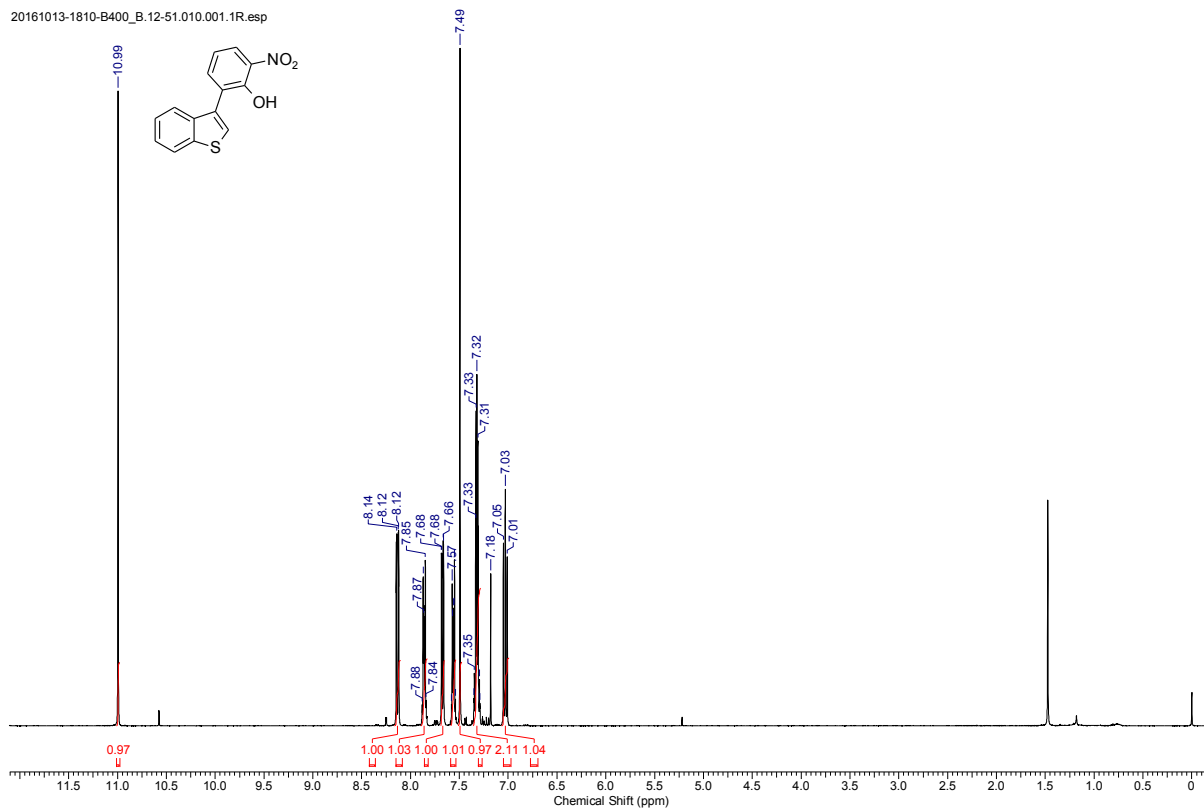

#### 4j <sup>13</sup>C NMR (101 MHz, CDCl<sub>3</sub>)

20161013-1810-B400\_B.12-51.012.001.1R.esp

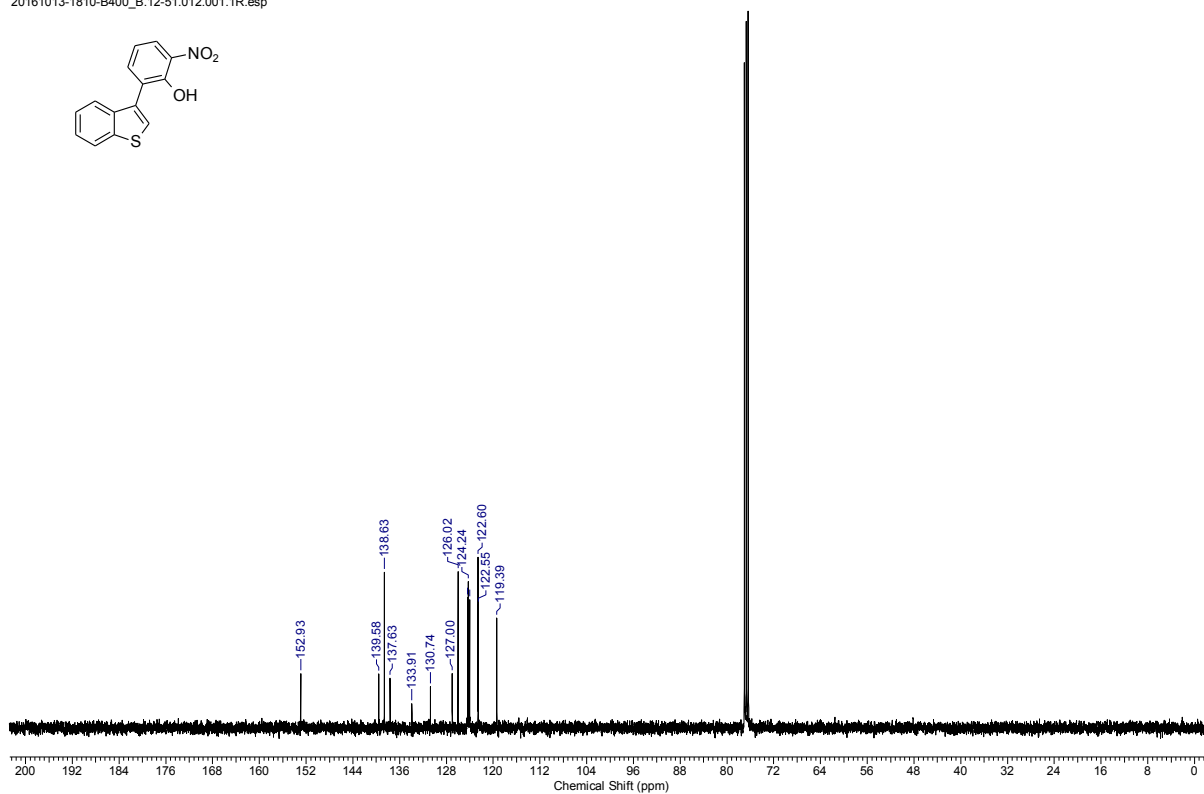



### Supplementary Figure 21.

#### 4k <sup>1</sup>H NMR (400 MHz, CDCl<sub>3</sub>)

20161017-1757-B500\_B.14-15.010.001.1r.esp

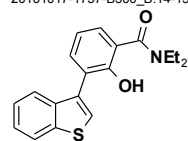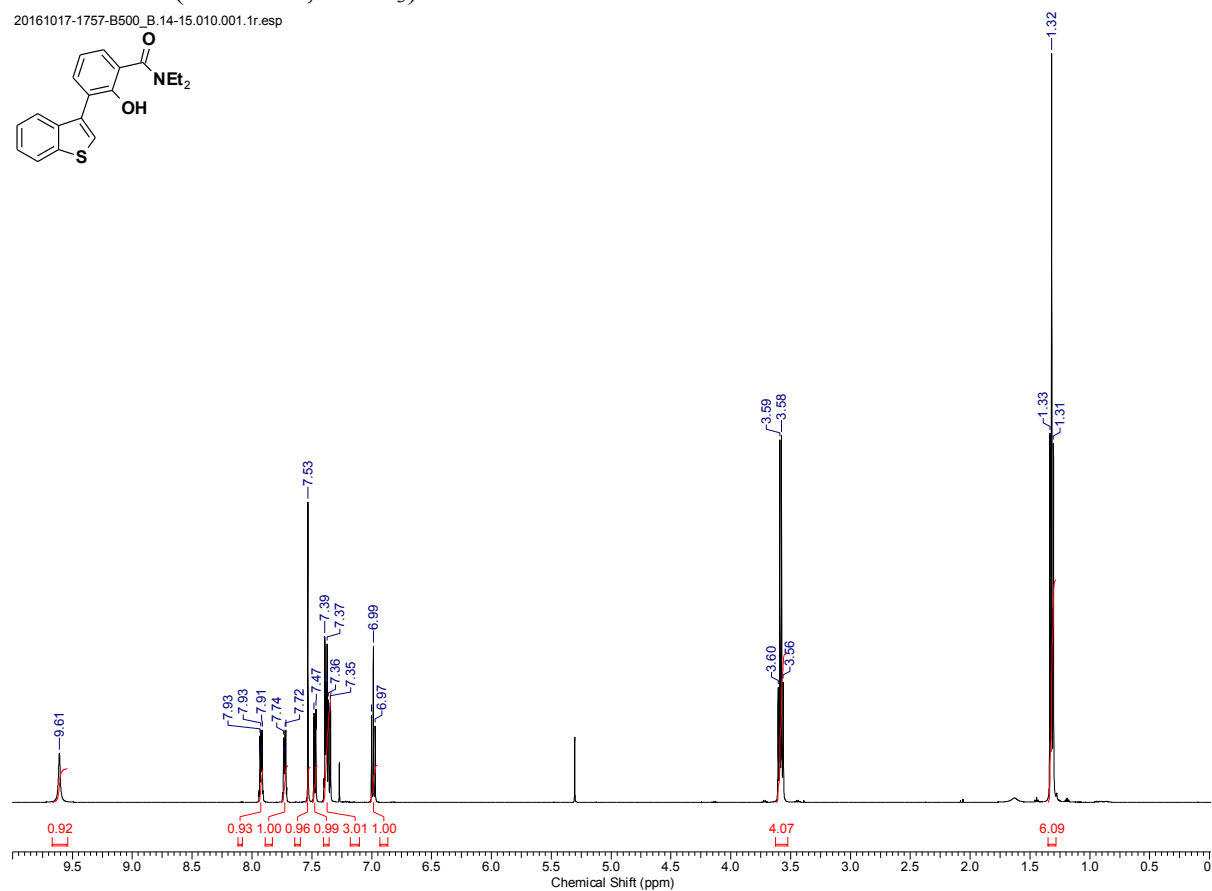

#### 4k <sup>13</sup>C NMR (101 MHz, CDCl<sub>3</sub>)

20161017-1757-B500\_B.14-15.011.001.1r.esp

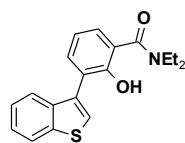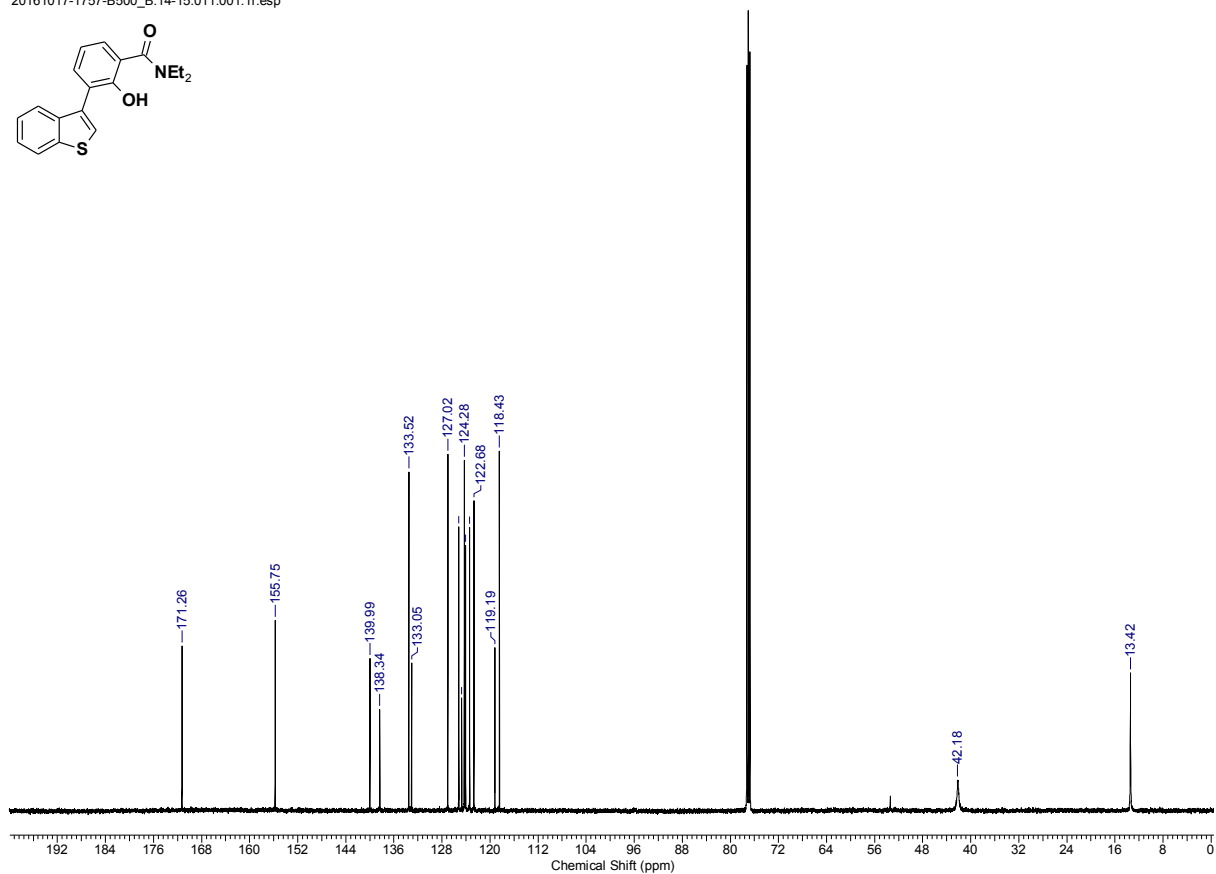

### Supplementary Figure 22.

#### 4l <sup>1</sup>H NMR (400 MHz, CDCl<sub>3</sub>)

20161017-1756-B500\_B.14-13.010.001.1r.esp

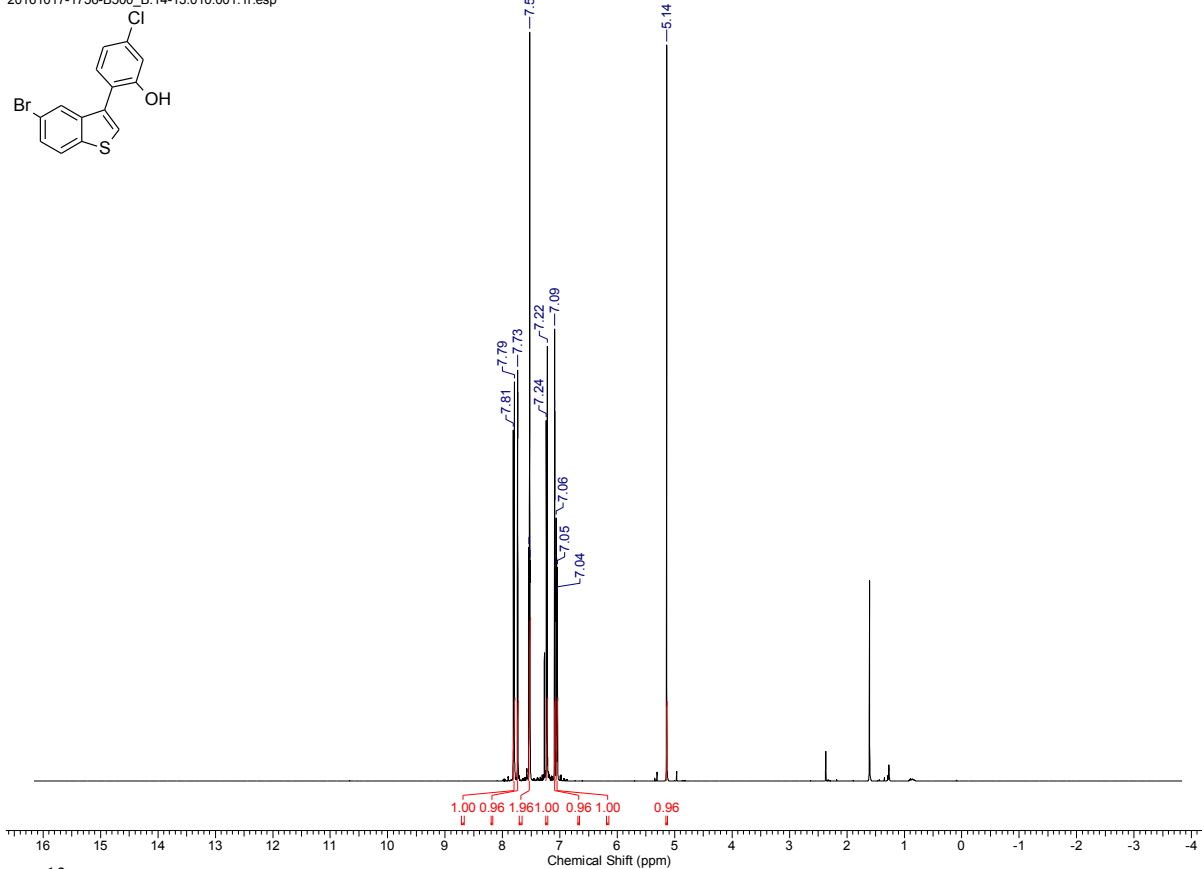

#### 4l <sup>13</sup>C NMR (101 MHz, CDCl<sub>3</sub>)

20161017-1756-B500\_B.14-13.011.001.1r.esp

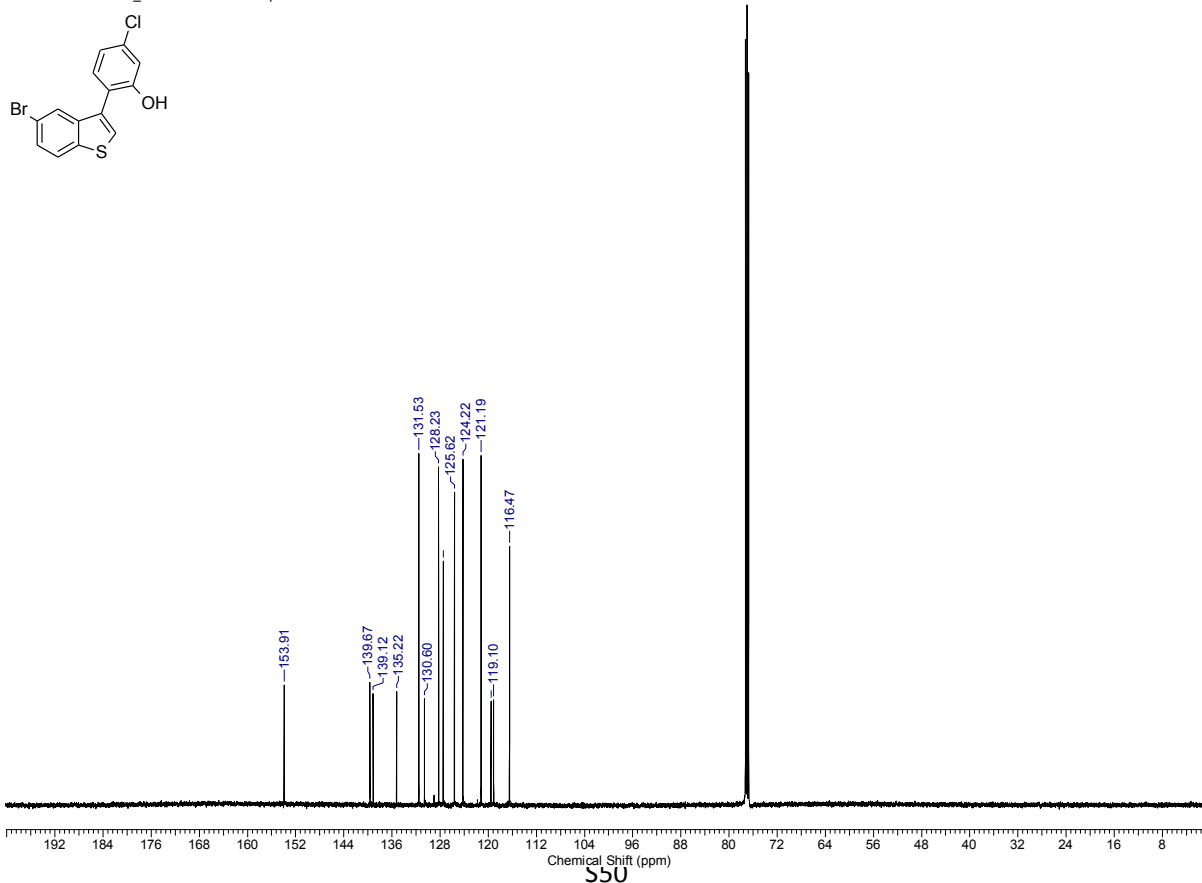

### Supplementary Figure 23.

#### 4m <sup>1</sup>H NMR (400 MHz, CDCl<sub>3</sub>)

20160923-1737-B400\_B.12-31.010.001.1r.esp

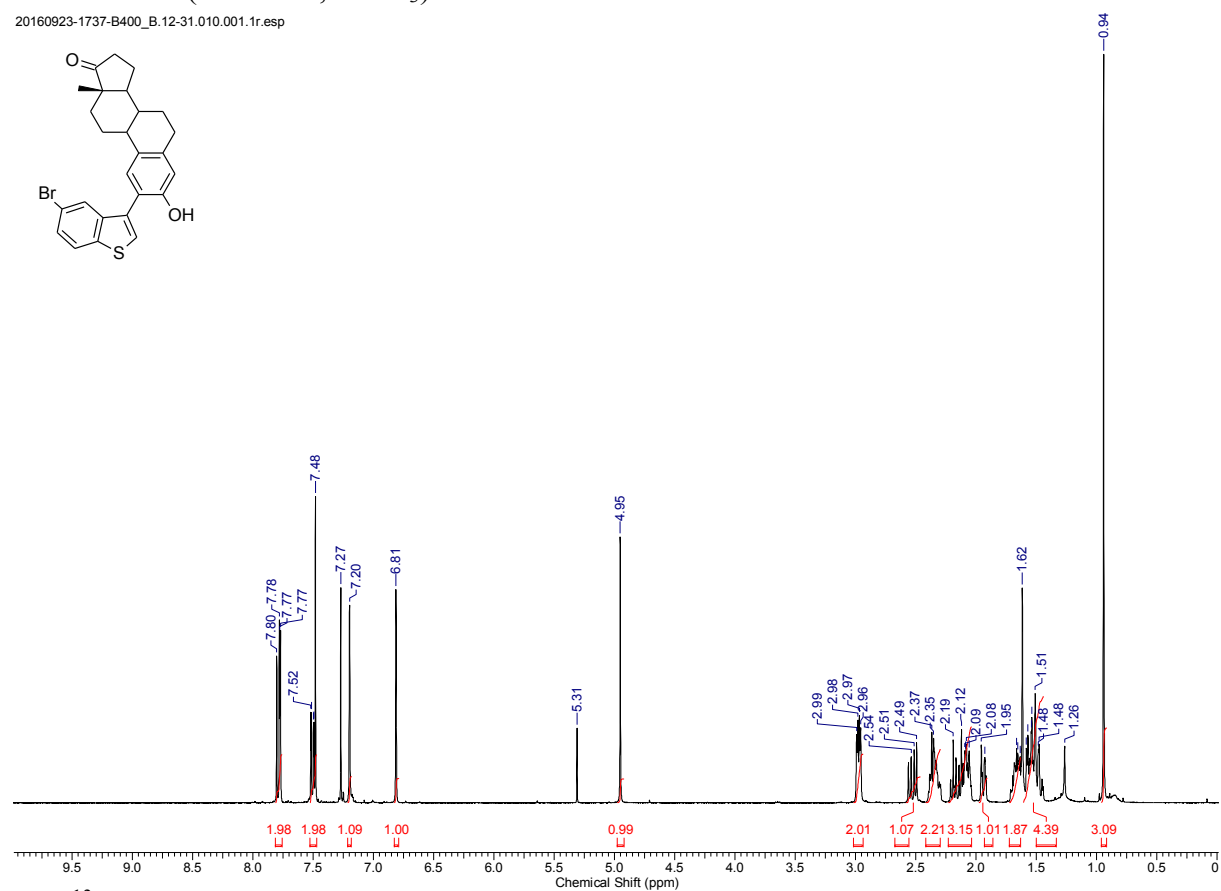

#### 4m <sup>13</sup>C NMR (101 MHz, CDCl<sub>3</sub>)

20160923-1737-B400\_B.12-31.011.001.1r.esp

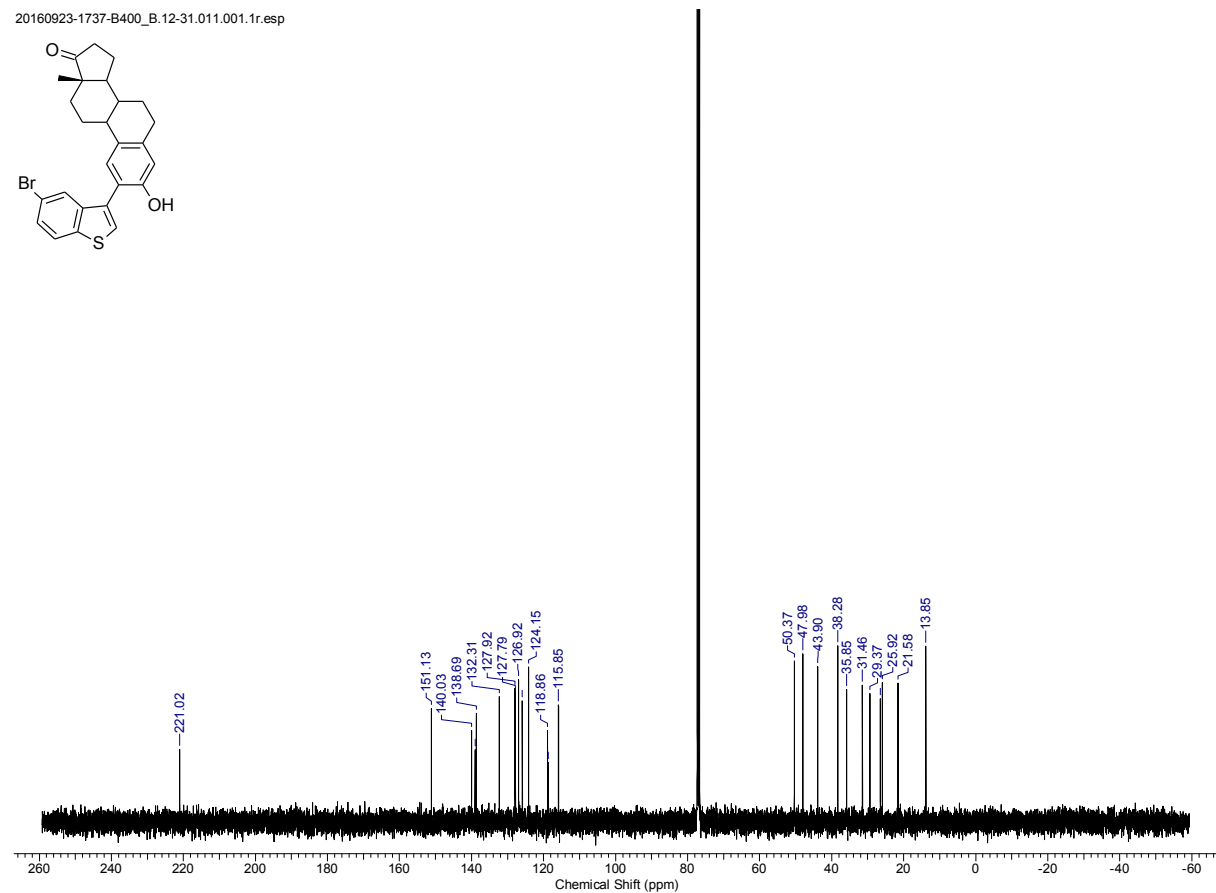

### Supplementary Figure 24.

#### 4n <sup>1</sup>H NMR (400 MHz, CDCl<sub>3</sub>)

20161017-1757-B500\_B.14-14.010.001.1r.esp

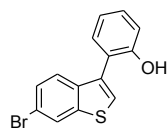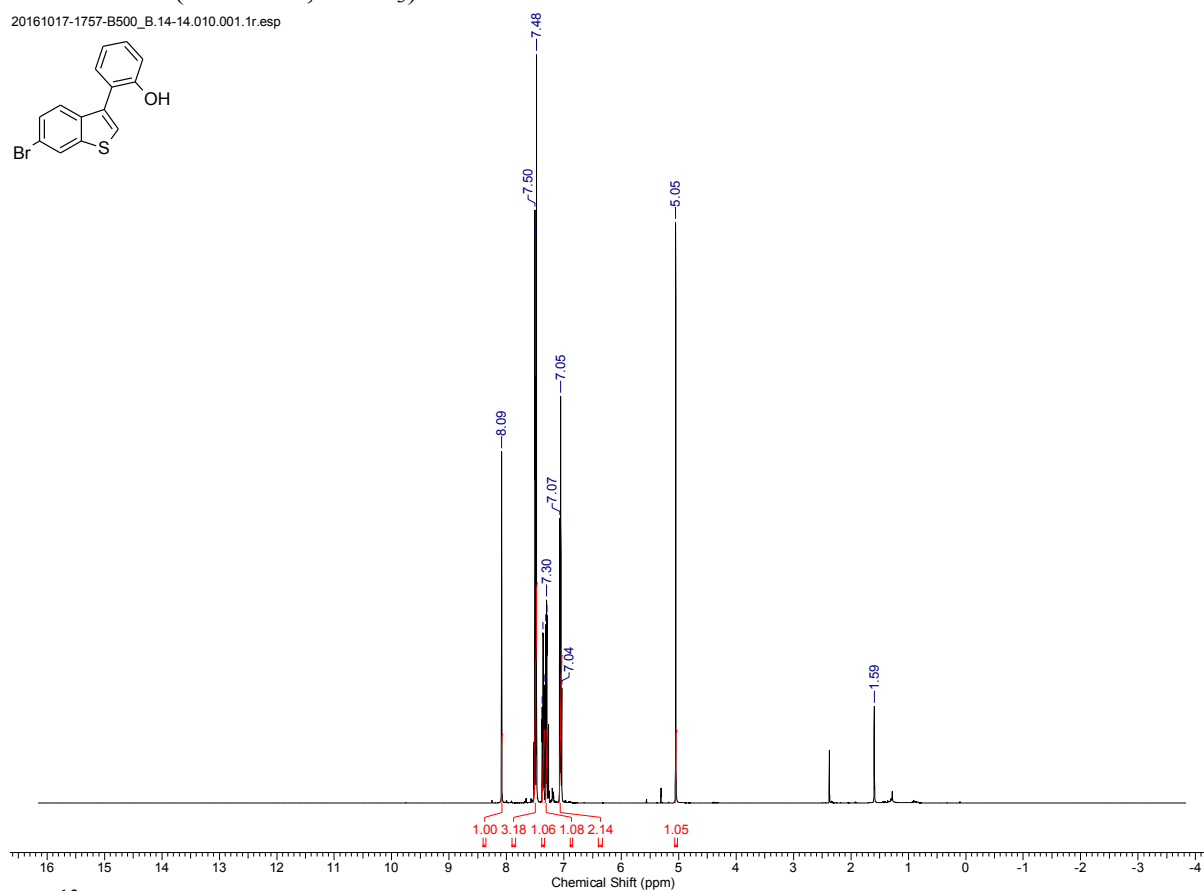

#### 4n <sup>13</sup>C NMR (101 MHz, CDCl<sub>3</sub>)

20161017-1757-B500\_B.14-14.011.001.1r.esp

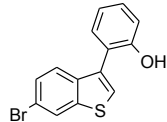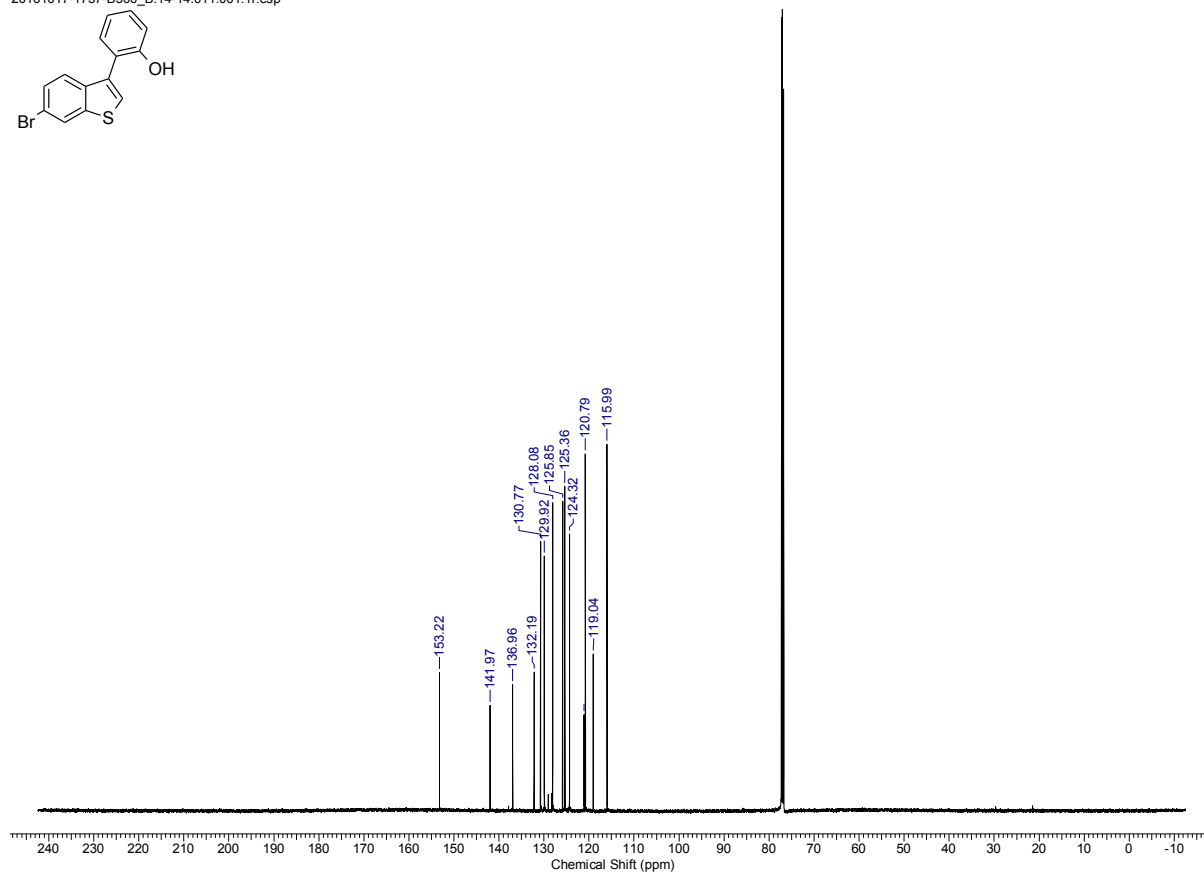

**Supplementary Figure 25.**  
**4o**  $^1\text{H}$  NMR (400 MHz,  $\text{CDCl}_3$ )

REAL PHENOL PROTON.ESP

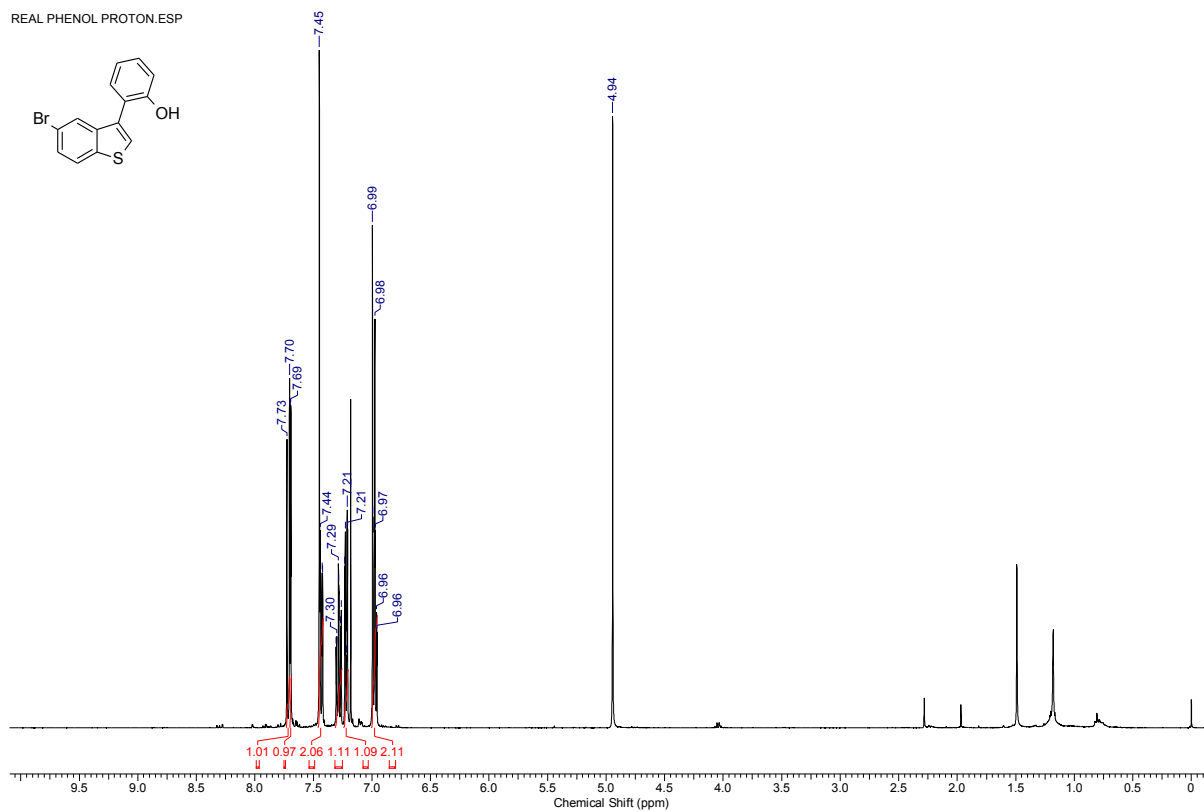

**4o**  $^{13}\text{C}$  NMR (101 MHz,  $\text{CDCl}_3$ )

REAL PHENOL CARBON.ESP

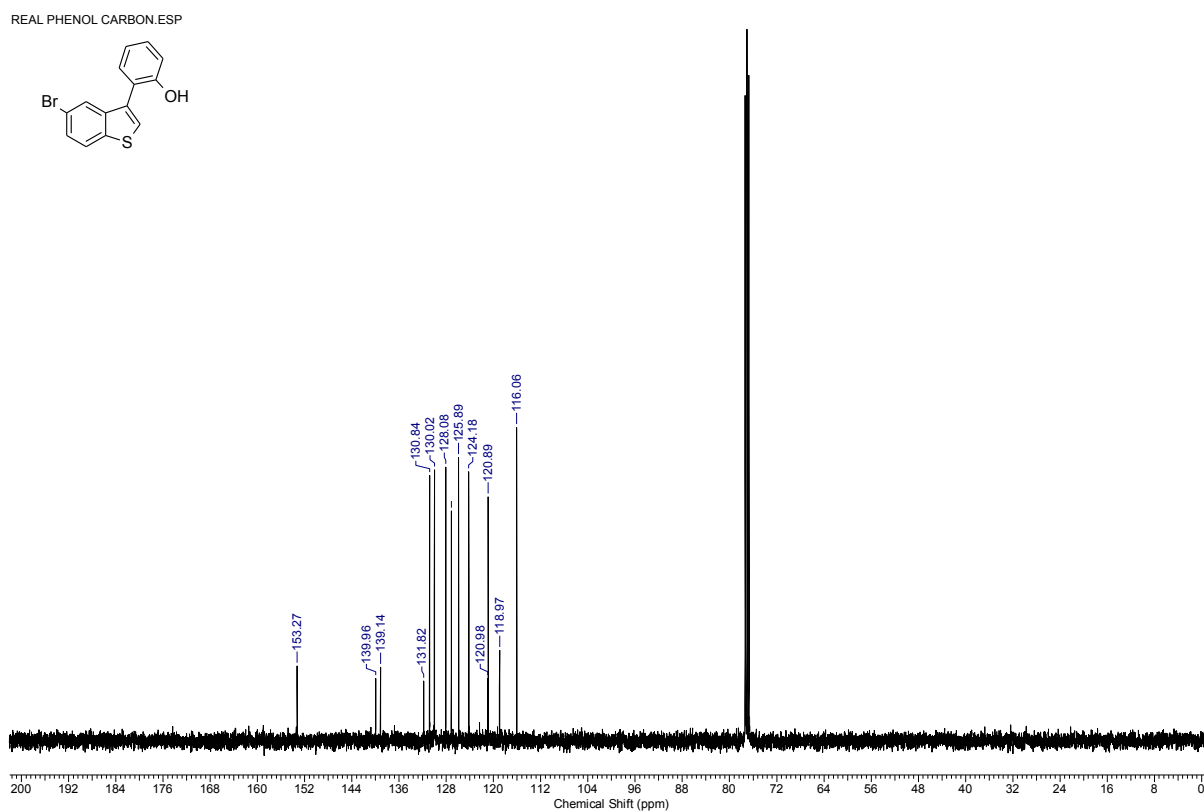

**Supplementary Figure 26.**  
**4p**  $^1\text{H}$  NMR (400 MHz,  $\text{CDCl}_3$ )

HJS213-03-PROTON.ESP

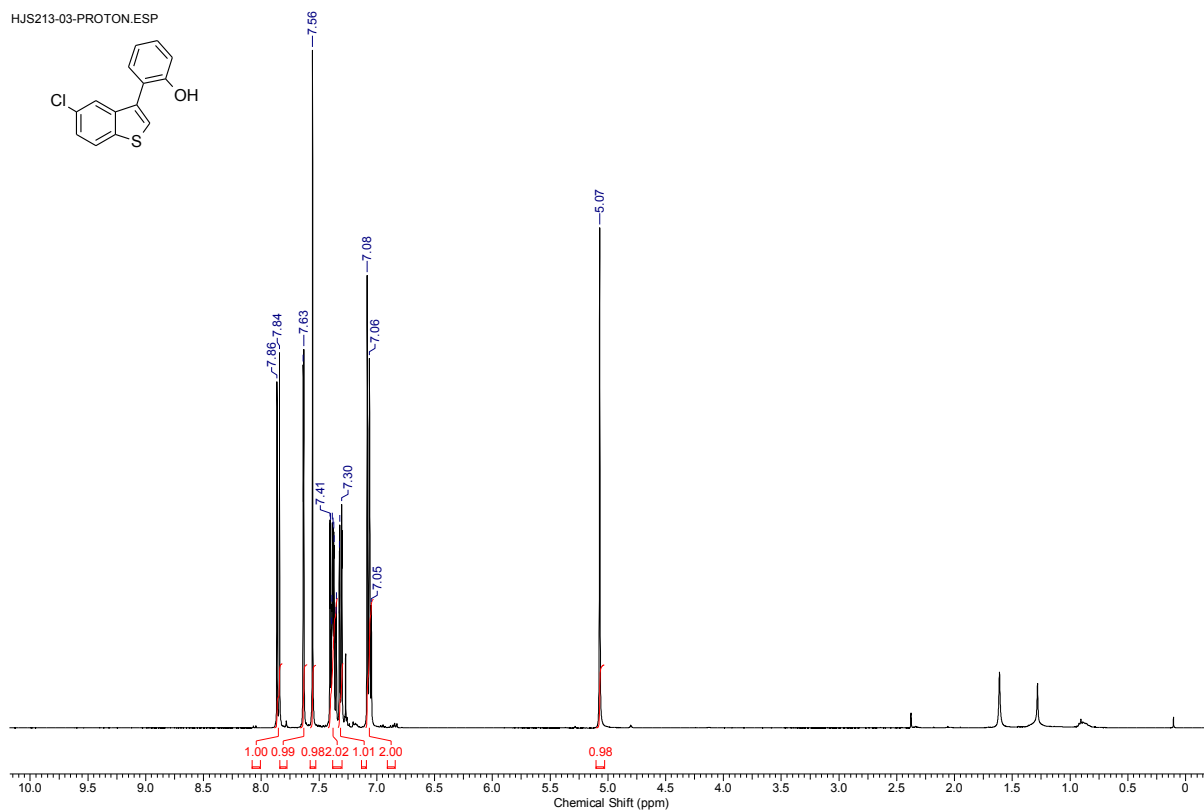

**4p**  $^{13}\text{C}$  NMR (101 MHz,  $\text{CDCl}_3$ )

HJS213-03-CARBON.ESP

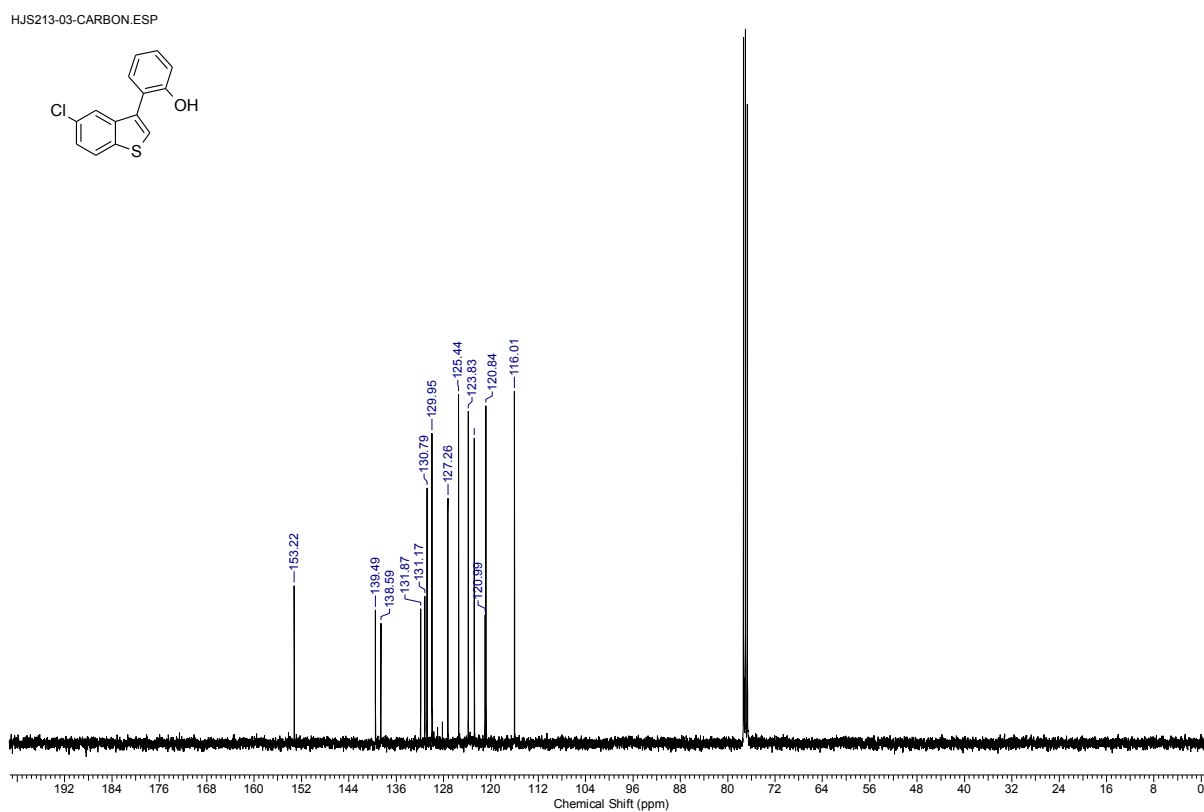

### Supplementary Figure 27.

#### 4q $^1\text{H}$ NMR (400 MHz, $\text{CDCl}_3$ )

20161012-1708-B500\_B.14-42.011.001.1r.esp

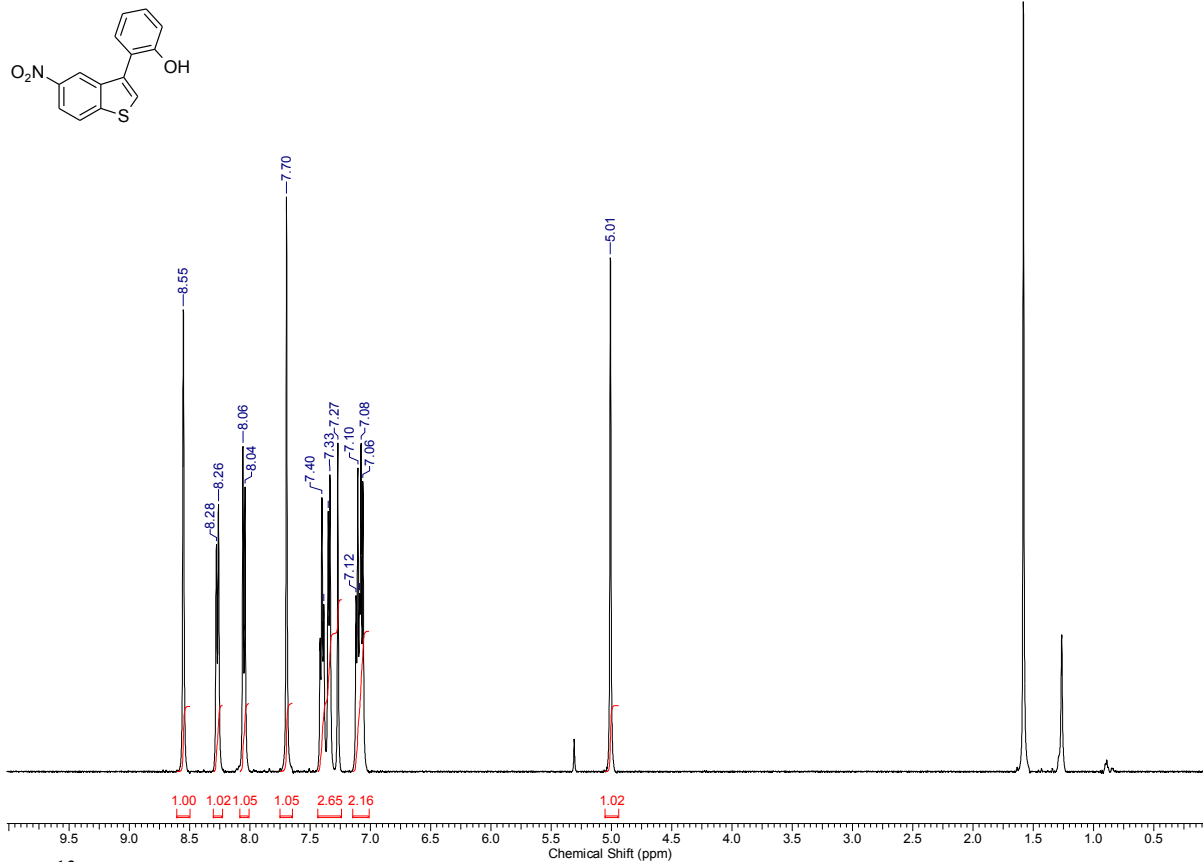

#### 4q $^{13}\text{C}$ NMR (101 MHz, $\text{CDCl}_3$ )

20161012-1708-B500\_B.14-42.011.001.1r.esp

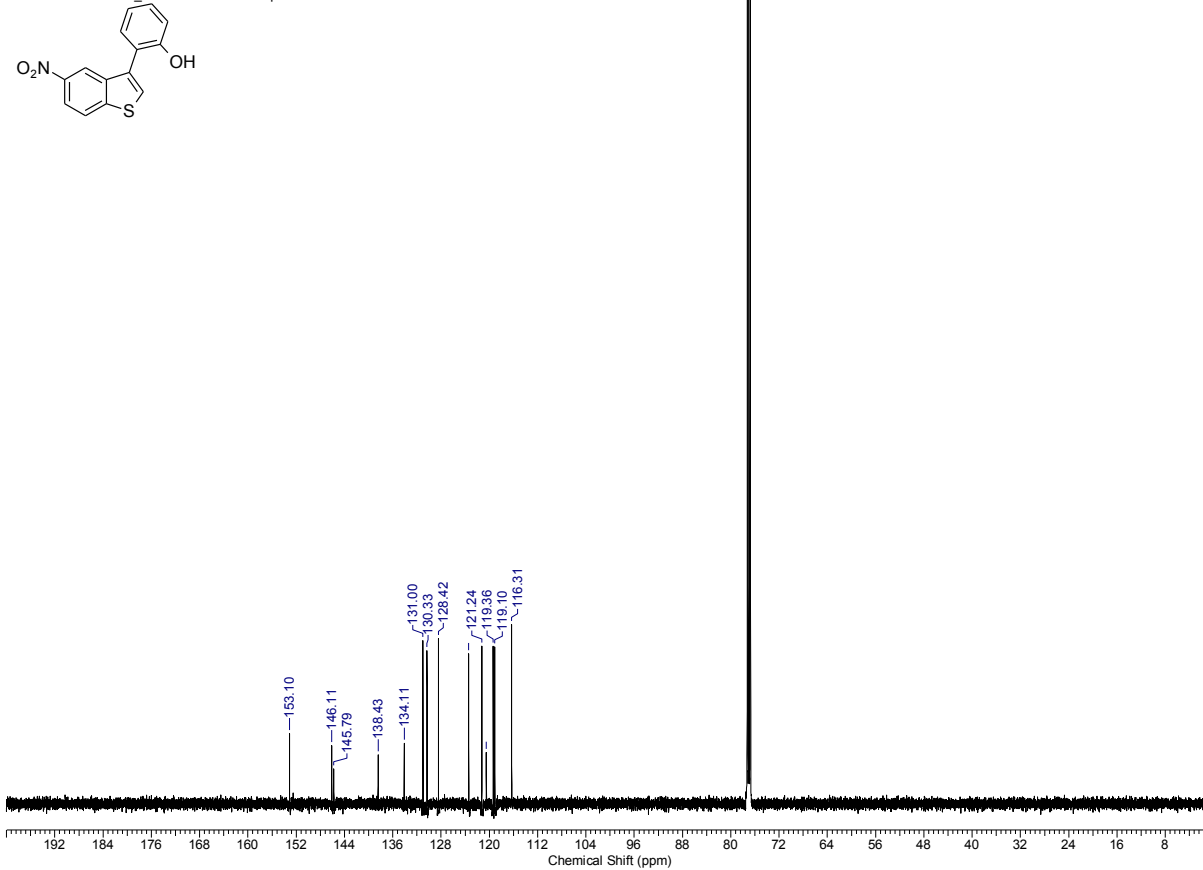

### Supplementary Figure 28.

#### 4r <sup>1</sup>H NMR (400 MHz, CDCl<sub>3</sub>)

20161010-1722-B400\_B.11-30.010.001.1r.esp

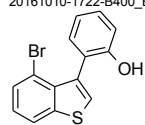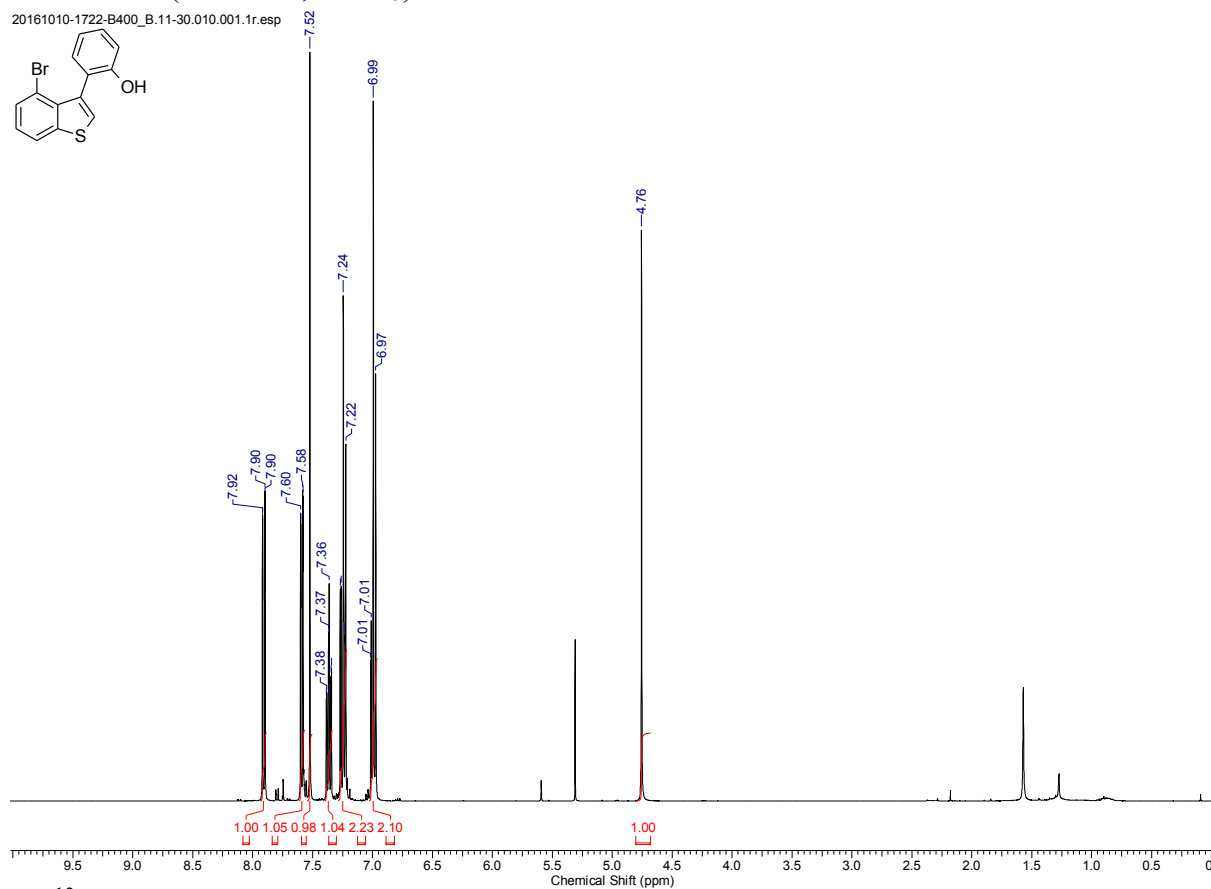

#### 4r <sup>13</sup>C NMR (101 MHz, CDCl<sub>3</sub>)

20161010-1722-B400\_B.11-30.011.001.1r.esp

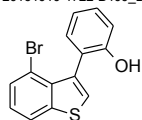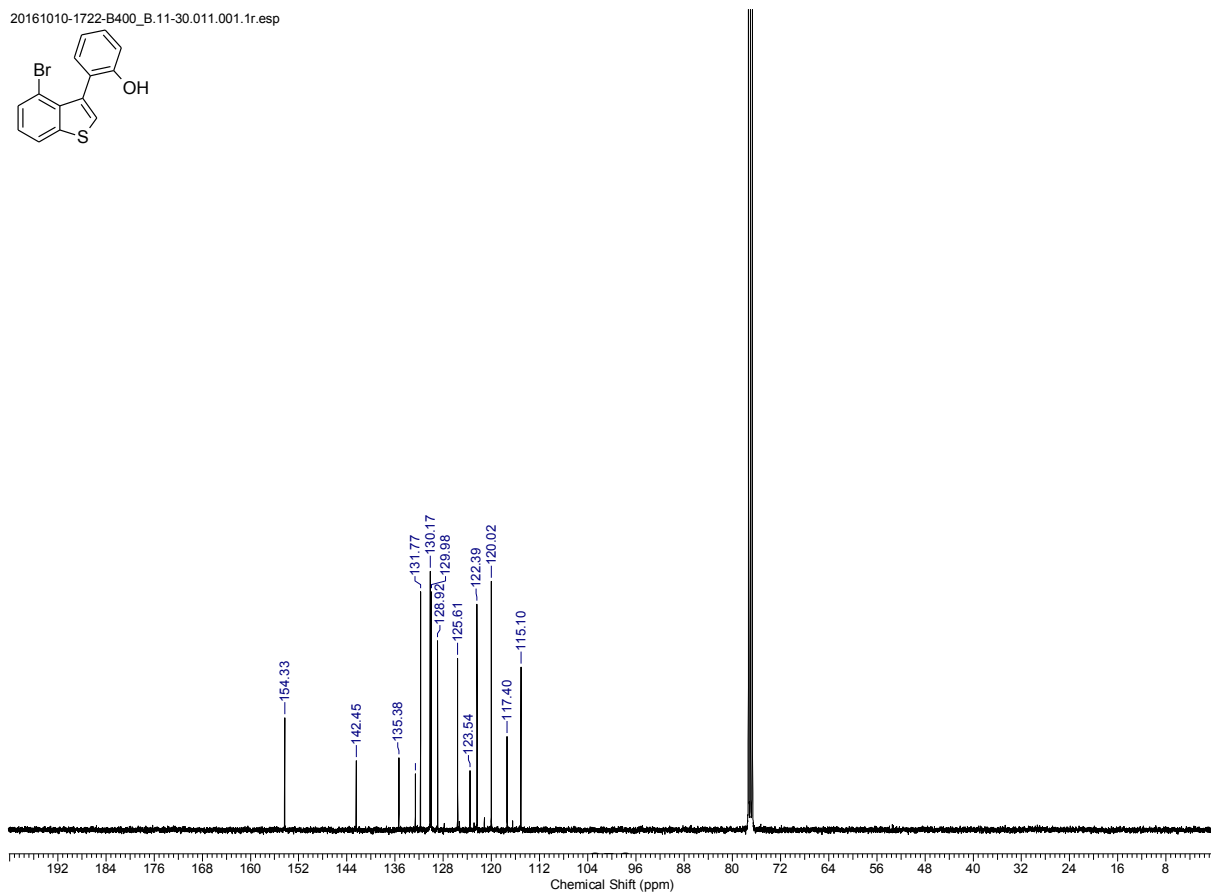



### Supplementary Figure 29.

#### 4s <sup>1</sup>H NMR (400 MHz, CDCl<sub>3</sub>)

20160901-1736-B400\_B.12-44.010.001.1r.esp

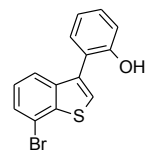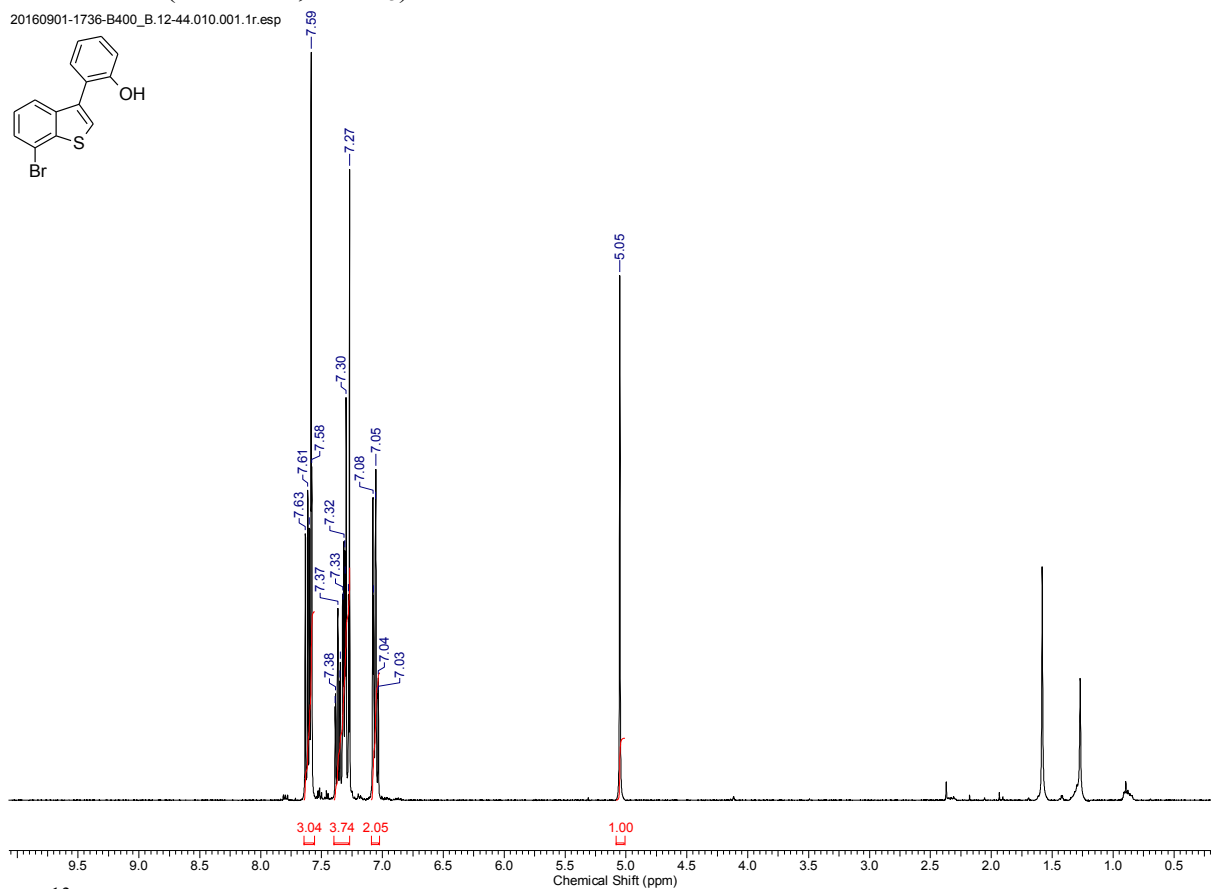

#### 4s <sup>13</sup>C NMR (101 MHz, CDCl<sub>3</sub>)

20160901-1736-B400\_B.12-44.011.001.1r.esp

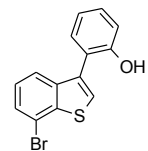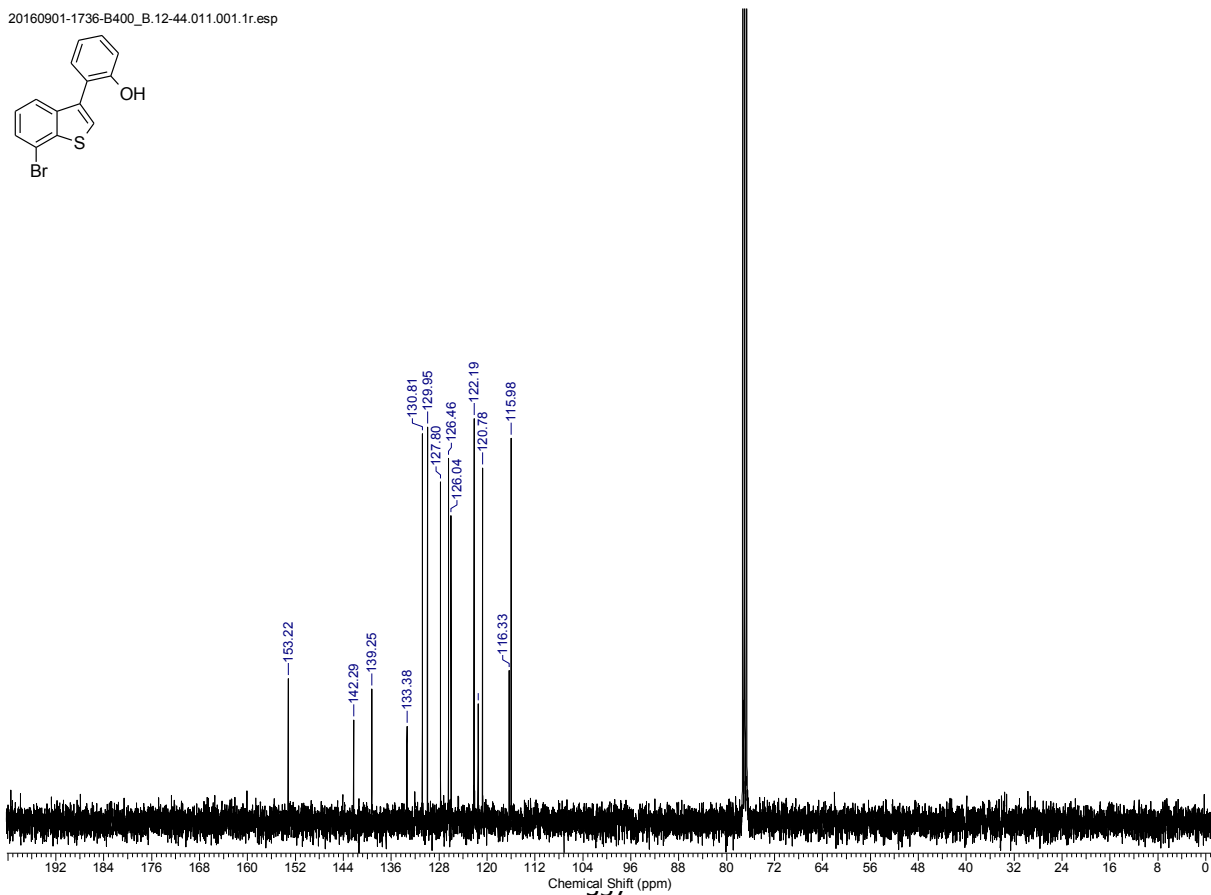

**Supplementary Figure 30.**  
**4t**  $^1\text{H}$  NMR (400 MHz,  $\text{CDCl}_3$ )

CH099.011.001.1r.esp

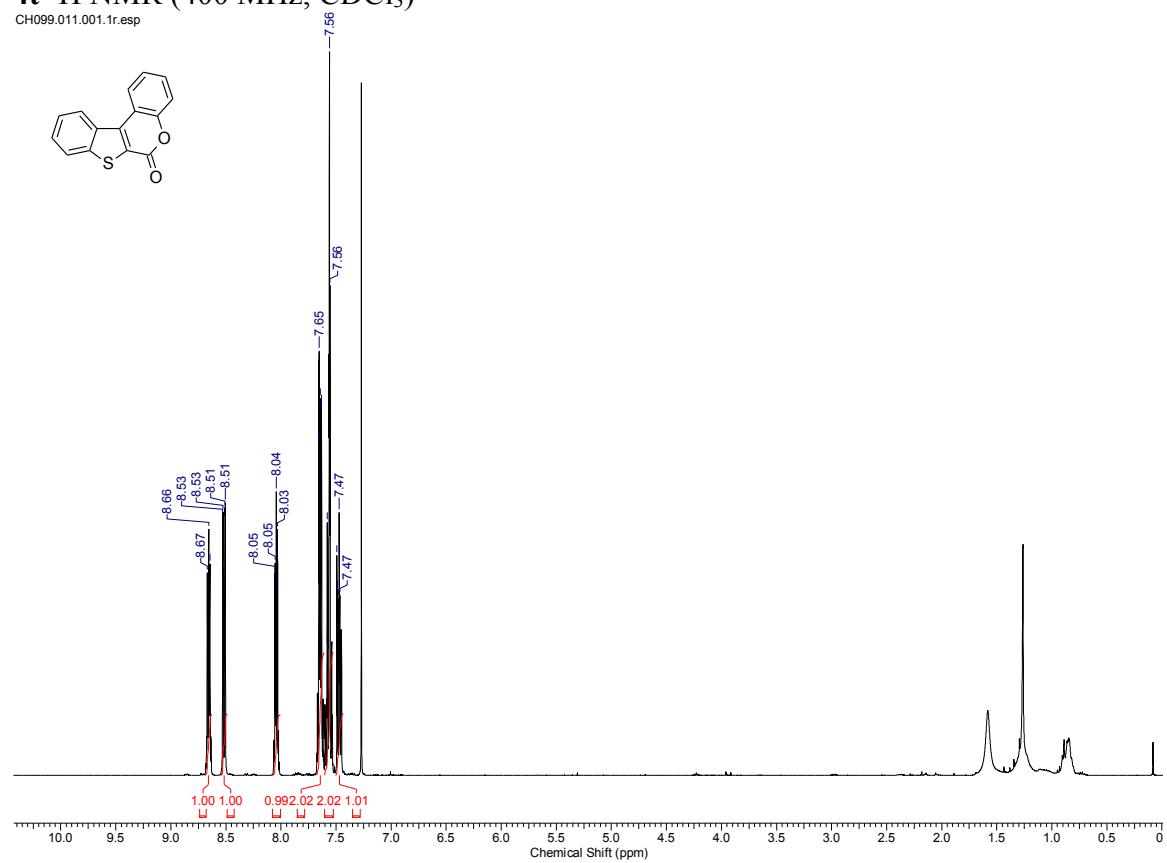

**4t**  $^{13}\text{C}$  NMR (101 MHz,  $\text{CDCl}_3$ )

CH099.012.001.1r.esp

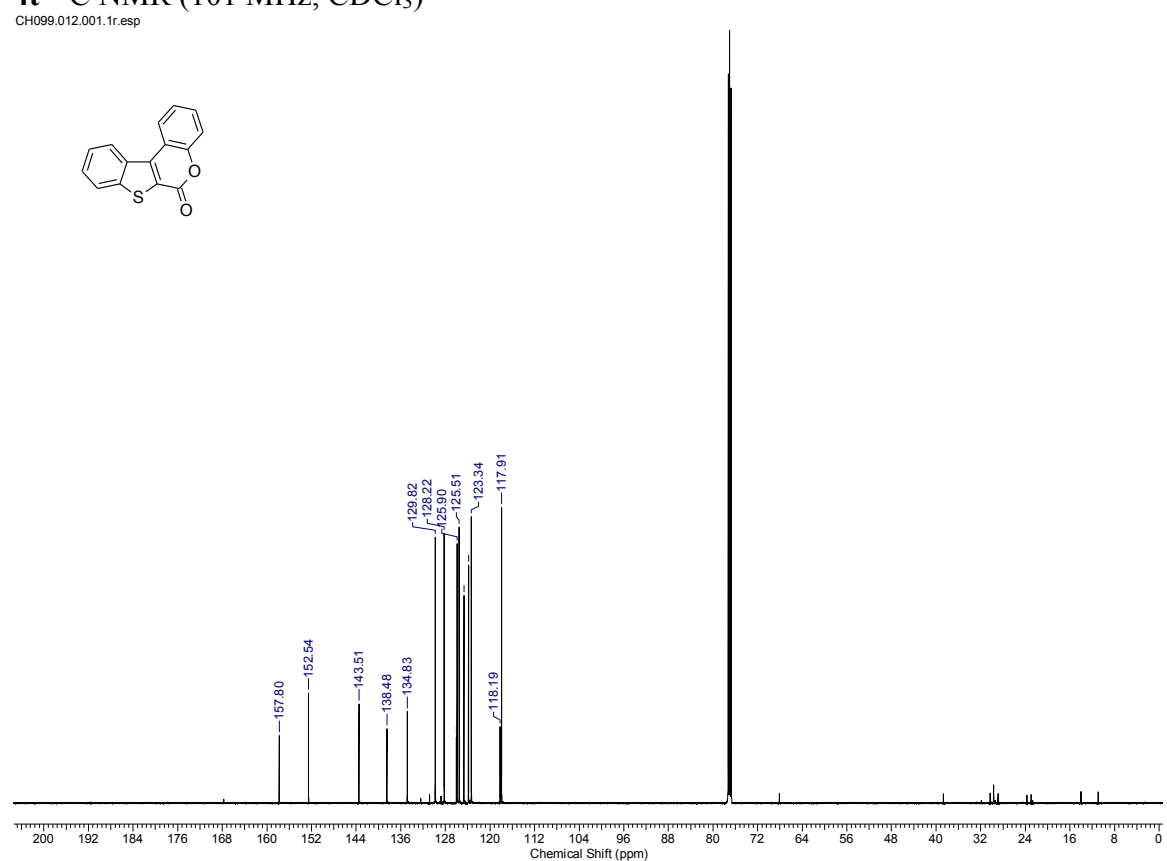

### Supplementary Figure 31.

#### 4u <sup>1</sup>H NMR (400 MHz, CDCl<sub>3</sub>)

CH097.011.001.1r.esp

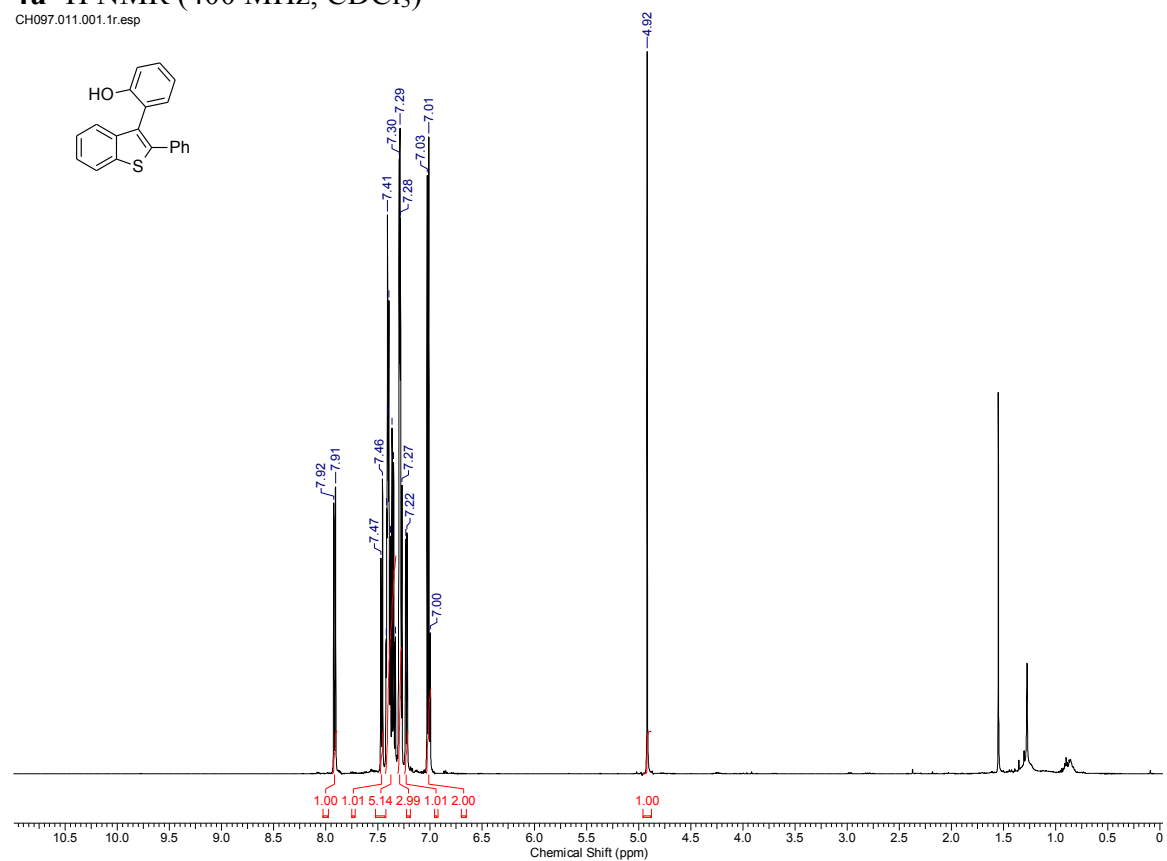

#### 4u <sup>13</sup>C NMR (101 MHz, CDCl<sub>3</sub>)

CH097.012.001.1r.esp

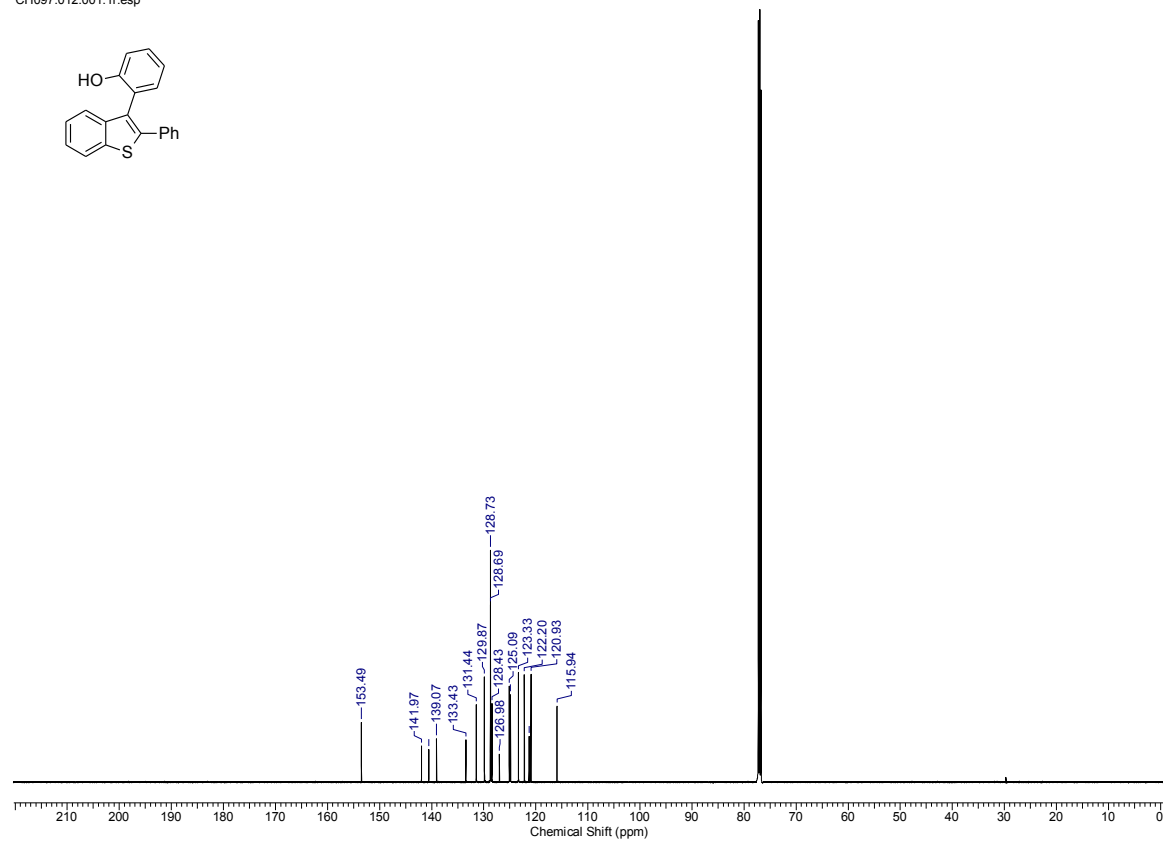

**Supplementary Figure 32.**  
**6a**  $^1\text{H}$  NMR (400 MHz,  $\text{CDCl}_3$ )

HJS025-04-PROTON ALLYL.ESP

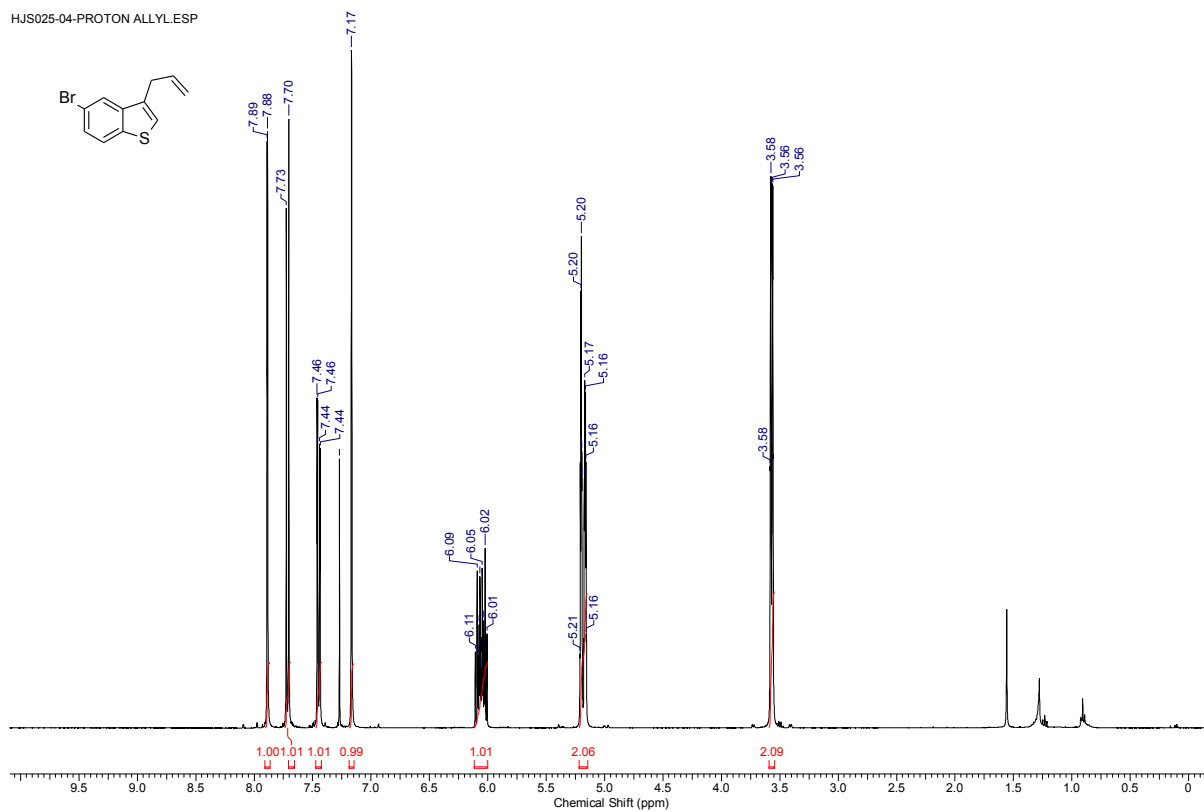

**6a**  $^{13}\text{C}$  NMR (101 MHz,  $\text{CDCl}_3$ )

HJS025-04-CARBON ALLYL.ESP

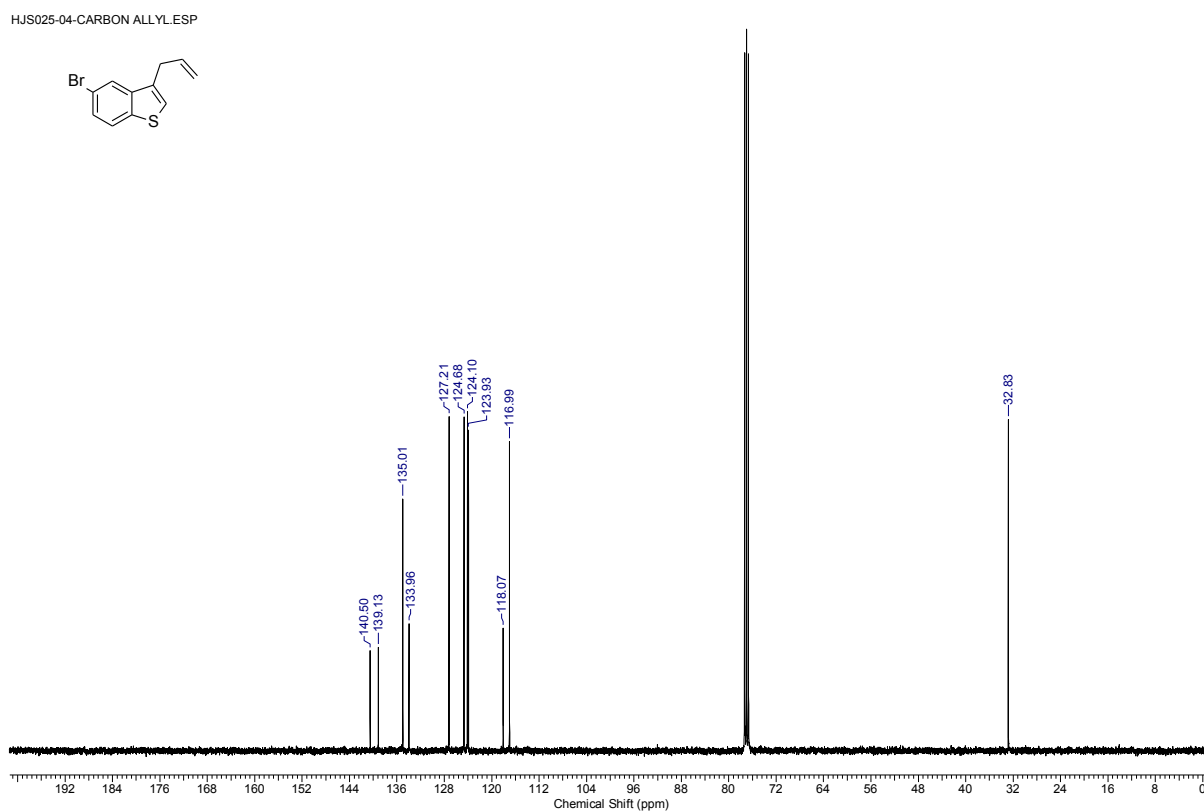

**Supplementary Figure 33.**  
**6b**  $^1\text{H}$  NMR (400 MHz,  $\text{CDCl}_3$ )

HJS029-04-PROTON.ESP

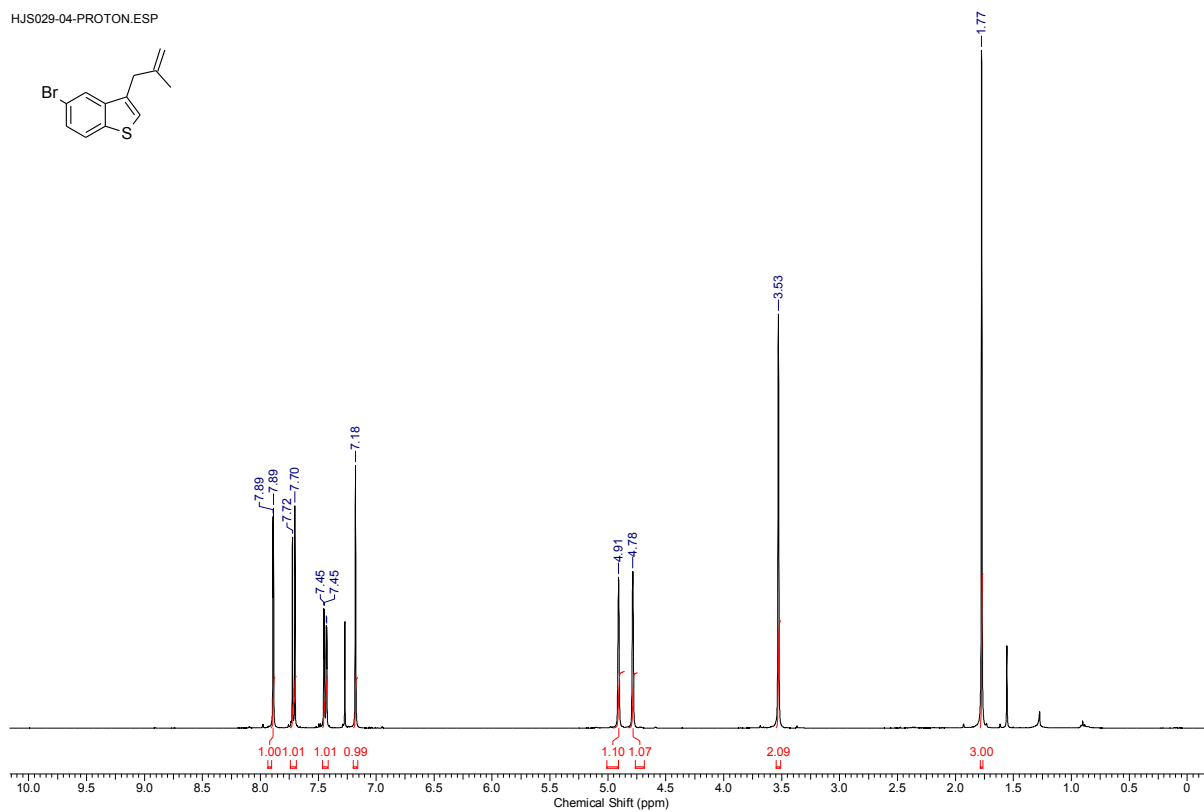

**6b**  $^{13}\text{C}$  NMR (101 MHz,  $\text{CDCl}_3$ )

HJS029-04-CARBON.ESP

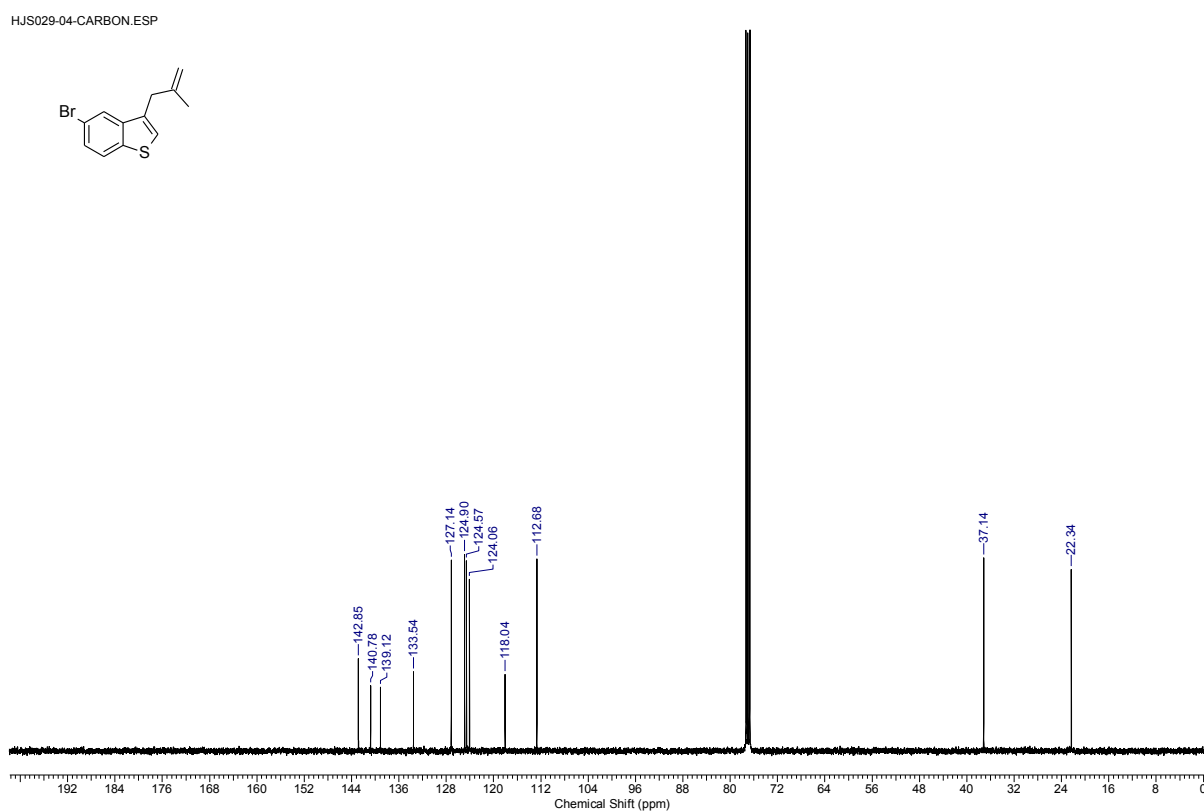

**Supplementary Figure 34.**  
**6c**  $^1\text{H}$  NMR (400 MHz,  $\text{CDCl}_3$ )

HJS028-04-PROTON.ESP

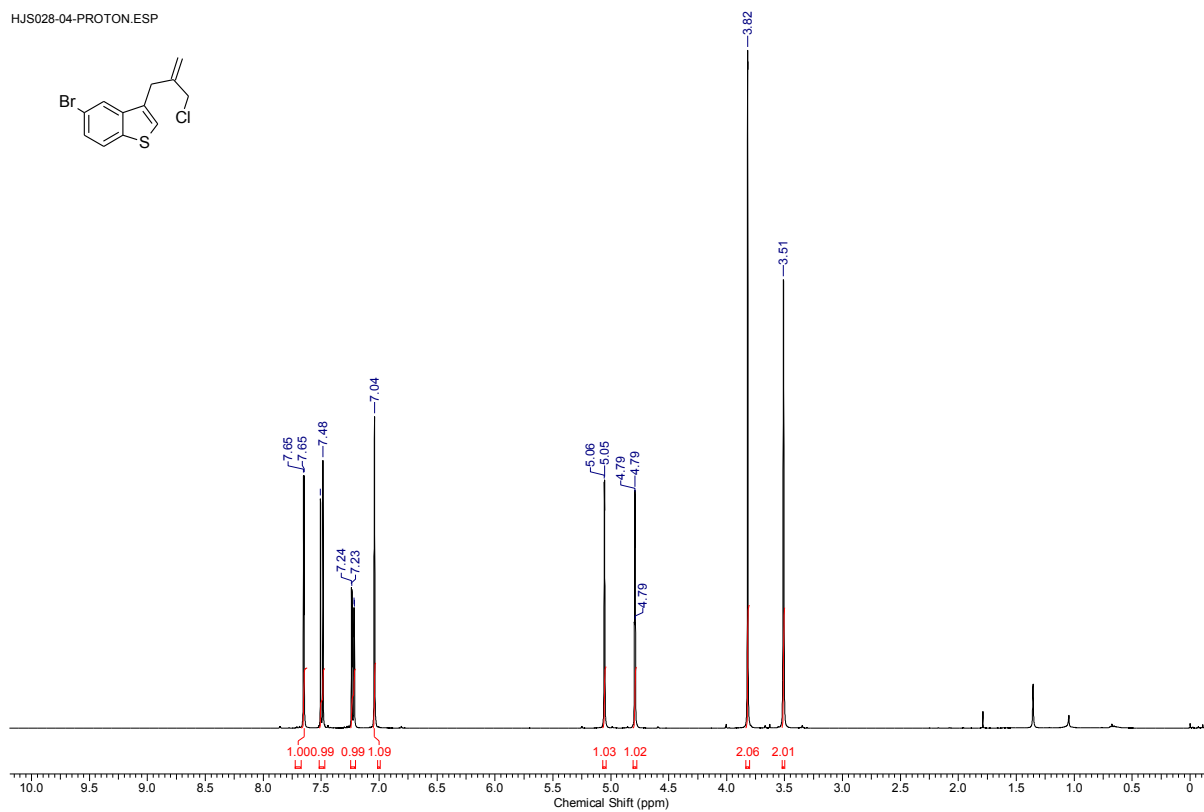

**6c**  $^{13}\text{C}$  NMR (101 MHz,  $\text{CDCl}_3$ )

HJS028-04-CARBON.ESP

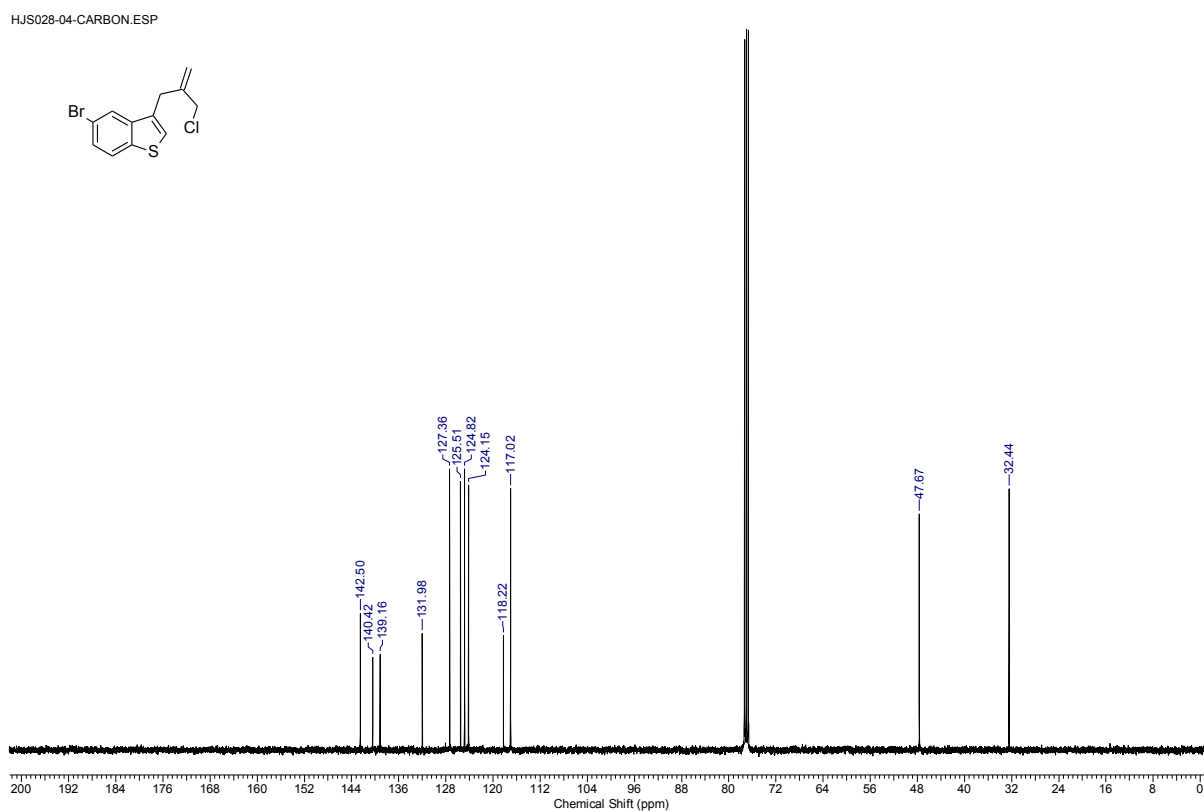

**Supplementary Figure 35.**  
**6d**  $^1\text{H}$  NMR (400 MHz,  $\text{CDCl}_3$ )

HJS041-04-Proton.esp

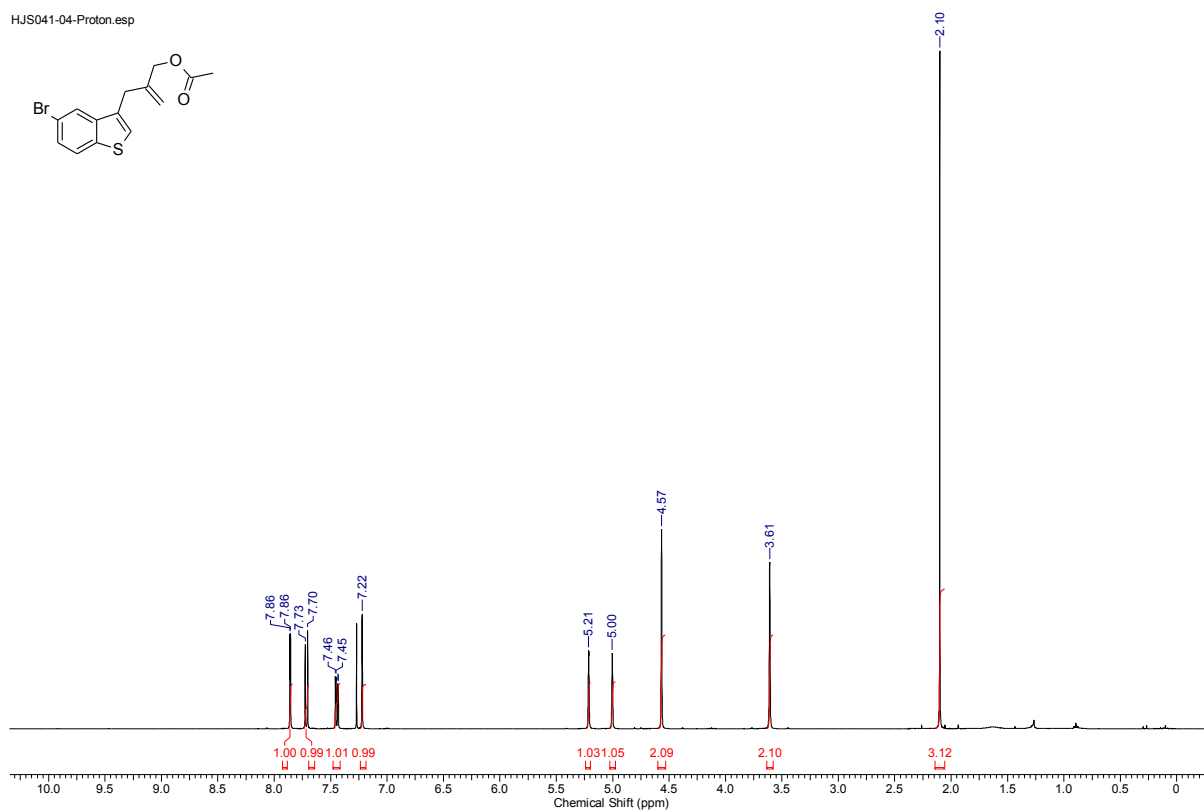

**6d**  $^{13}\text{C}$  NMR (101 MHz,  $\text{CDCl}_3$ )

HJS041-04-Carbon.esp

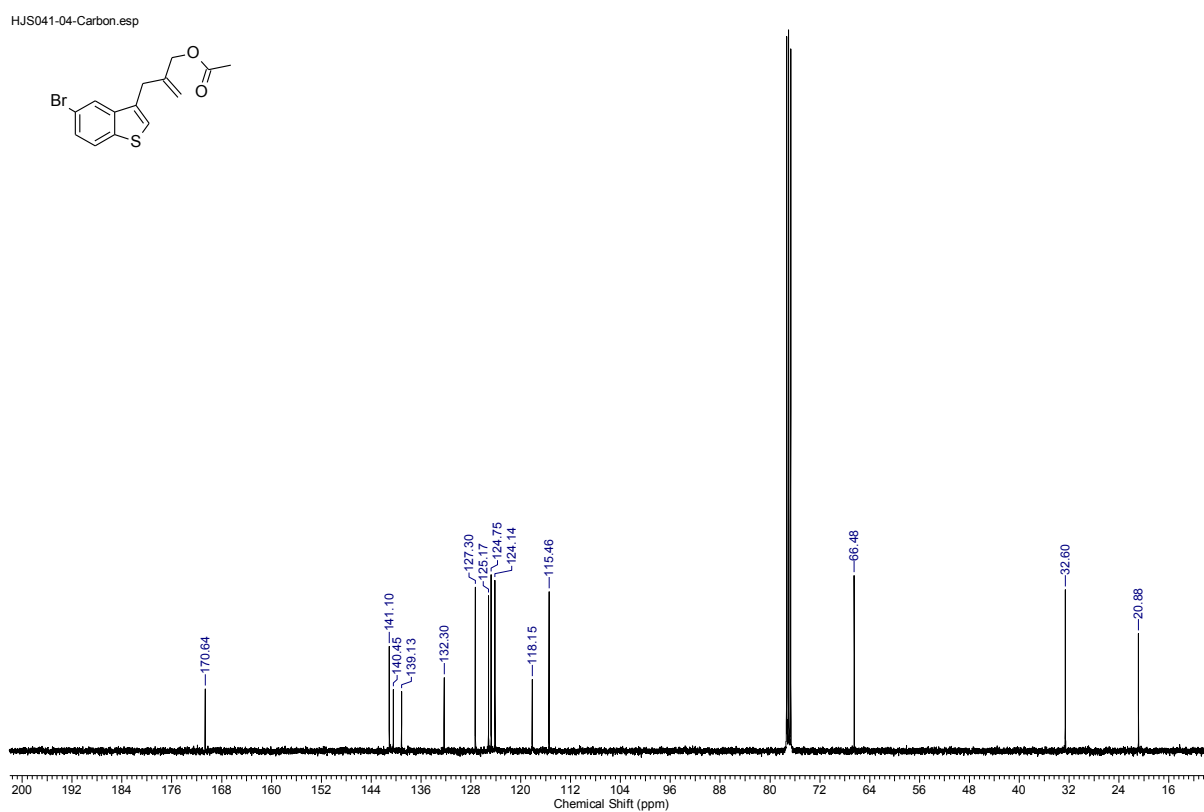

### Supplementary Figure 36.

**6e**  $^1\text{H}$  NMR (400 MHz,  $\text{CDCl}_3$ )

HJS040-04-Proton.esp

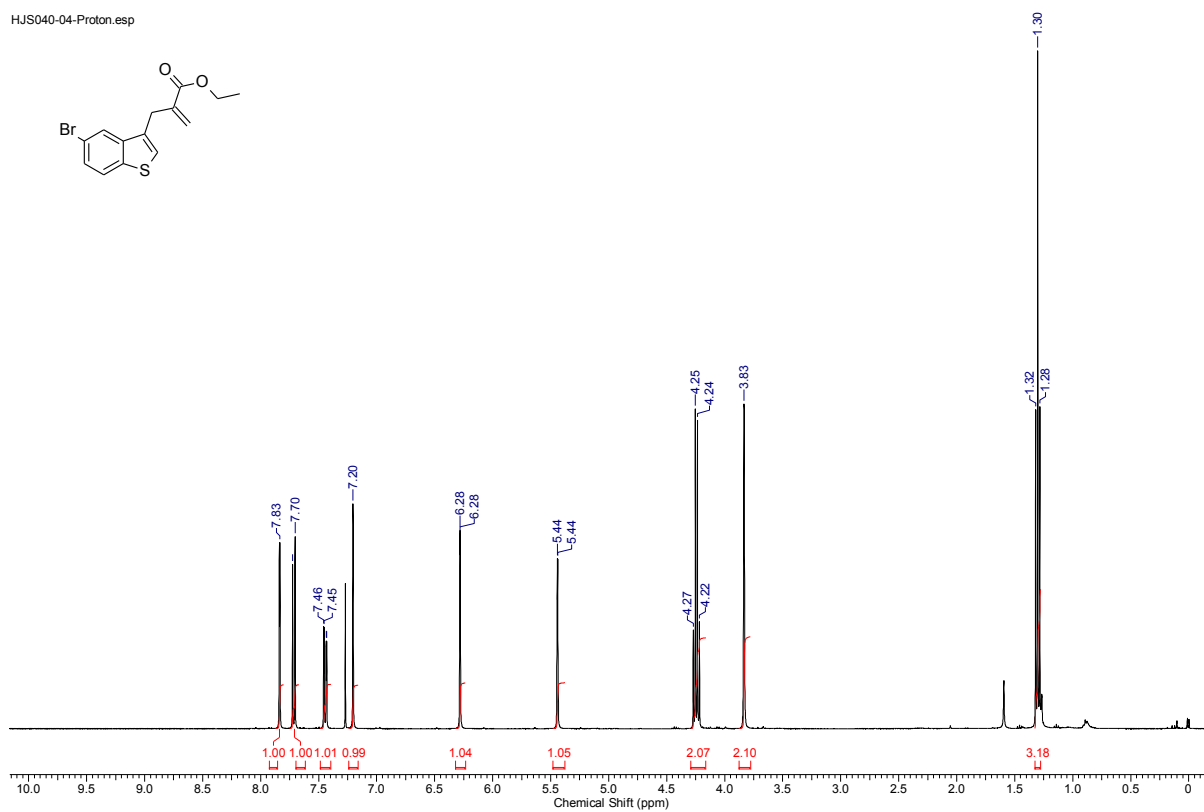

### **6e** $^{13}\text{C}$ NMR (101 MHz, $\text{CDCl}_3$ )

HJS040-04-Carbon.esp

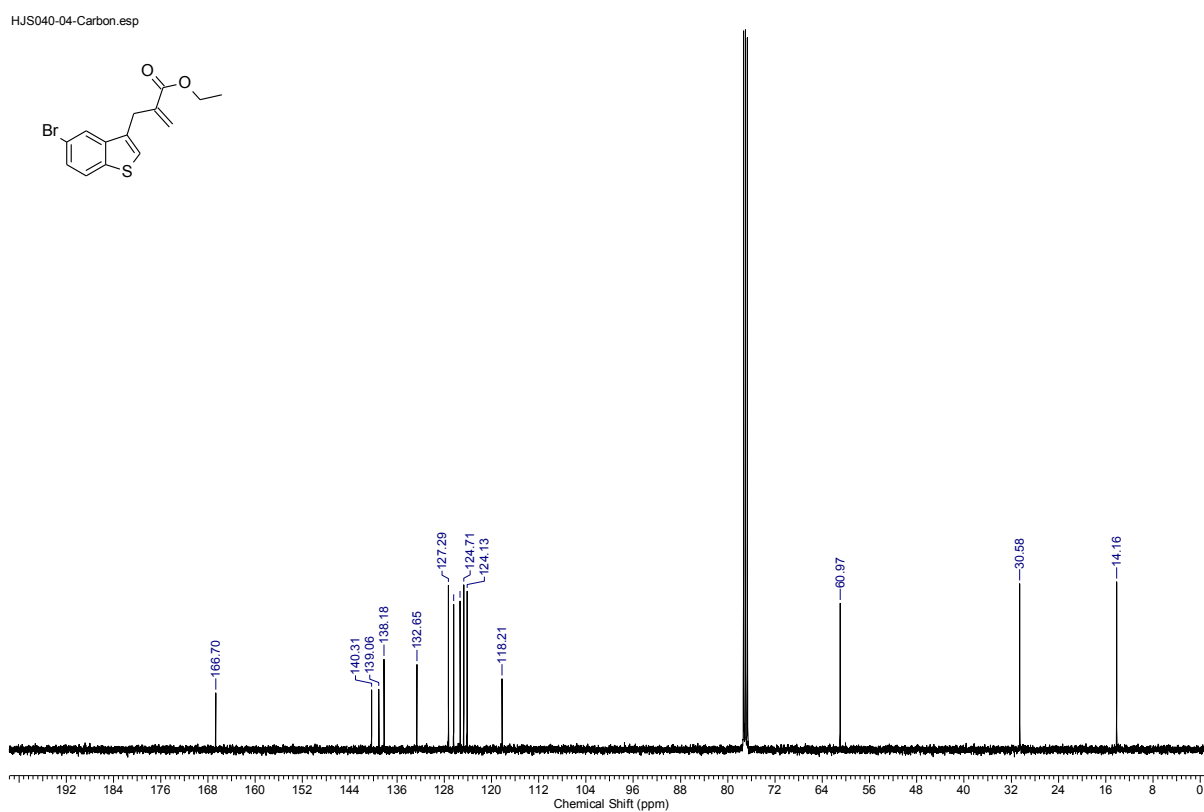



**Supplementary Figure 37.**  
**6f**  $^1\text{H}$  NMR (400 MHz,  $\text{CDCl}_3$ )

HJS035-04-Proton.esp

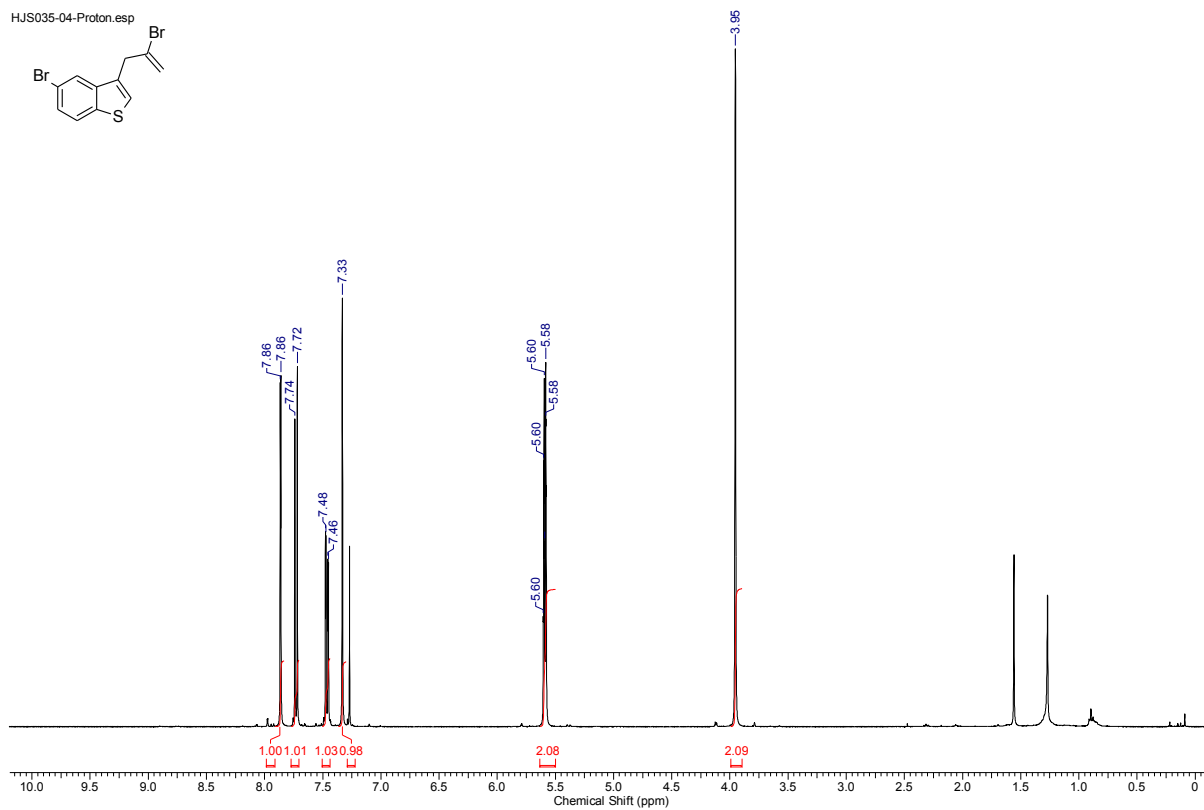

**6f**  $^{13}\text{C}$  NMR (101 MHz,  $\text{CDCl}_3$ )

HJS035-04-Carbon.esp

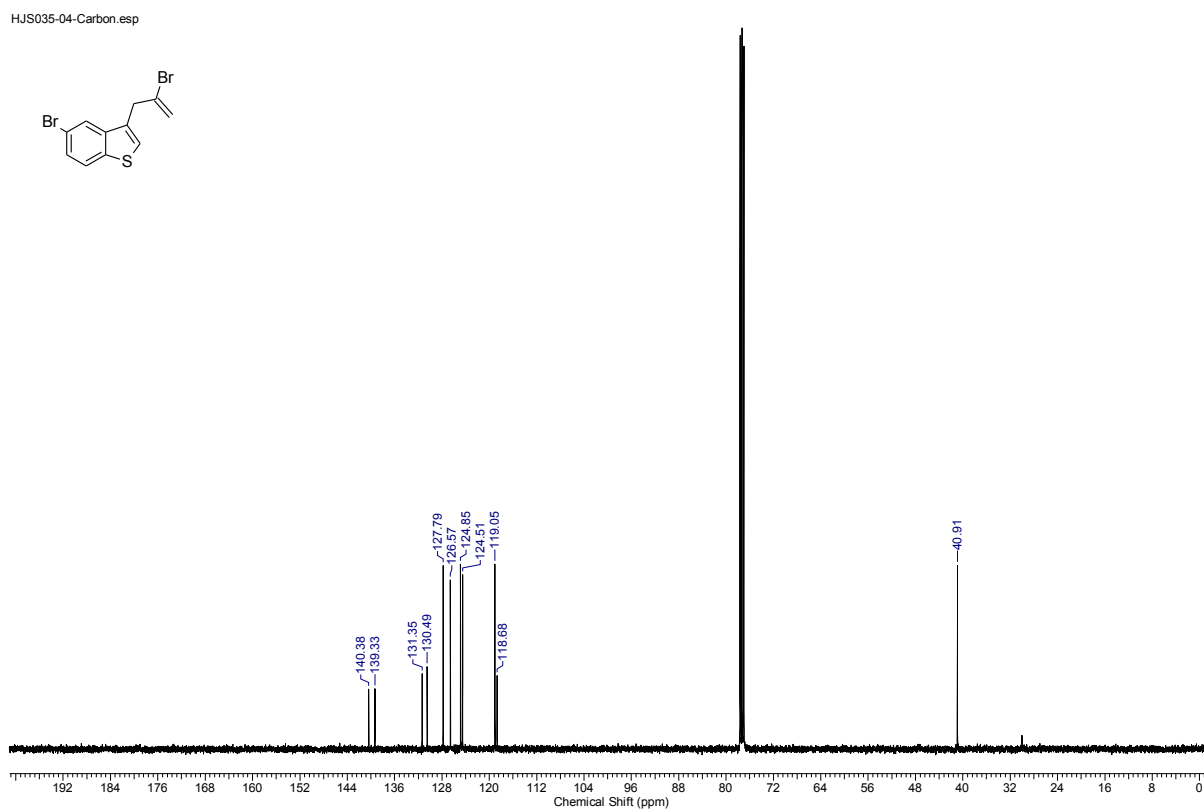

### Supplementary Figure 38.

#### 6g $^1\text{H}$ NMR (400 MHz, $\text{CDCl}_3$ )

20161108-1628-B400\_B.11-10.010.001.1R.esp

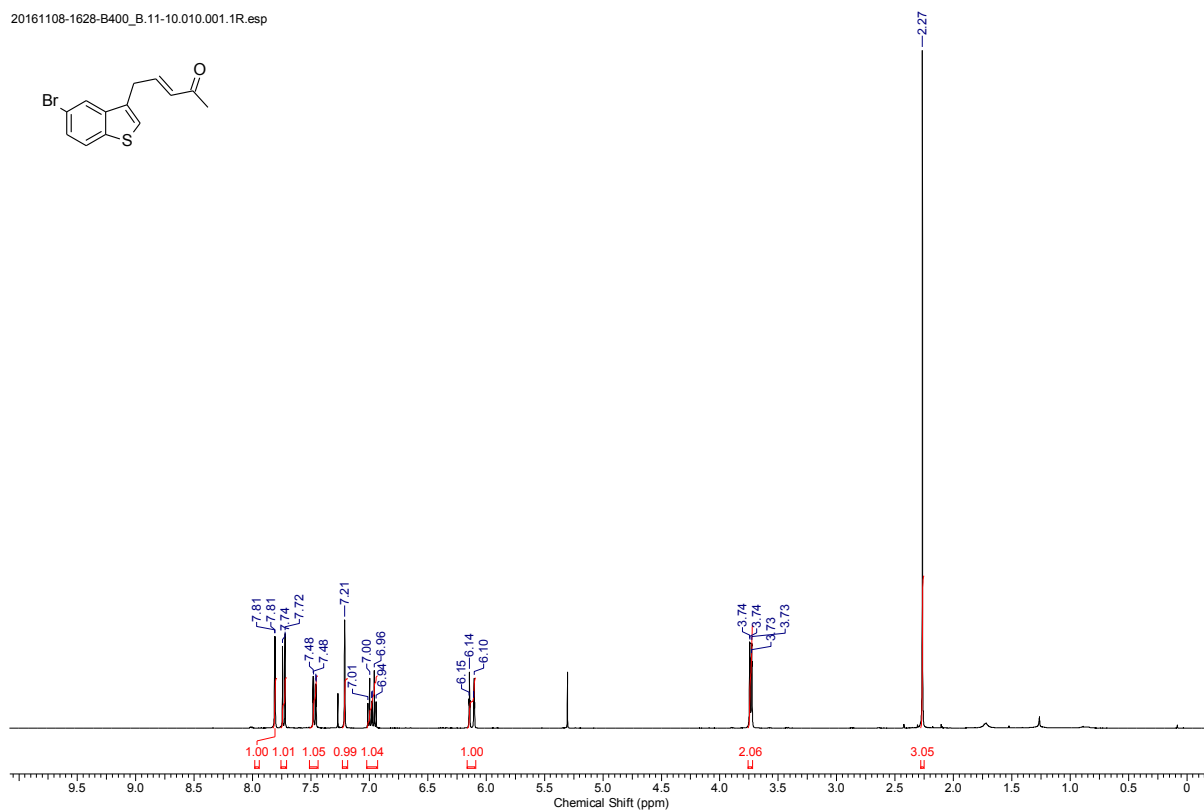

#### 6g $^{13}\text{C}$ NMR (101 MHz, $\text{CDCl}_3$ )

20161108-1628-B400\_B.11-10.011.001.1R.esp

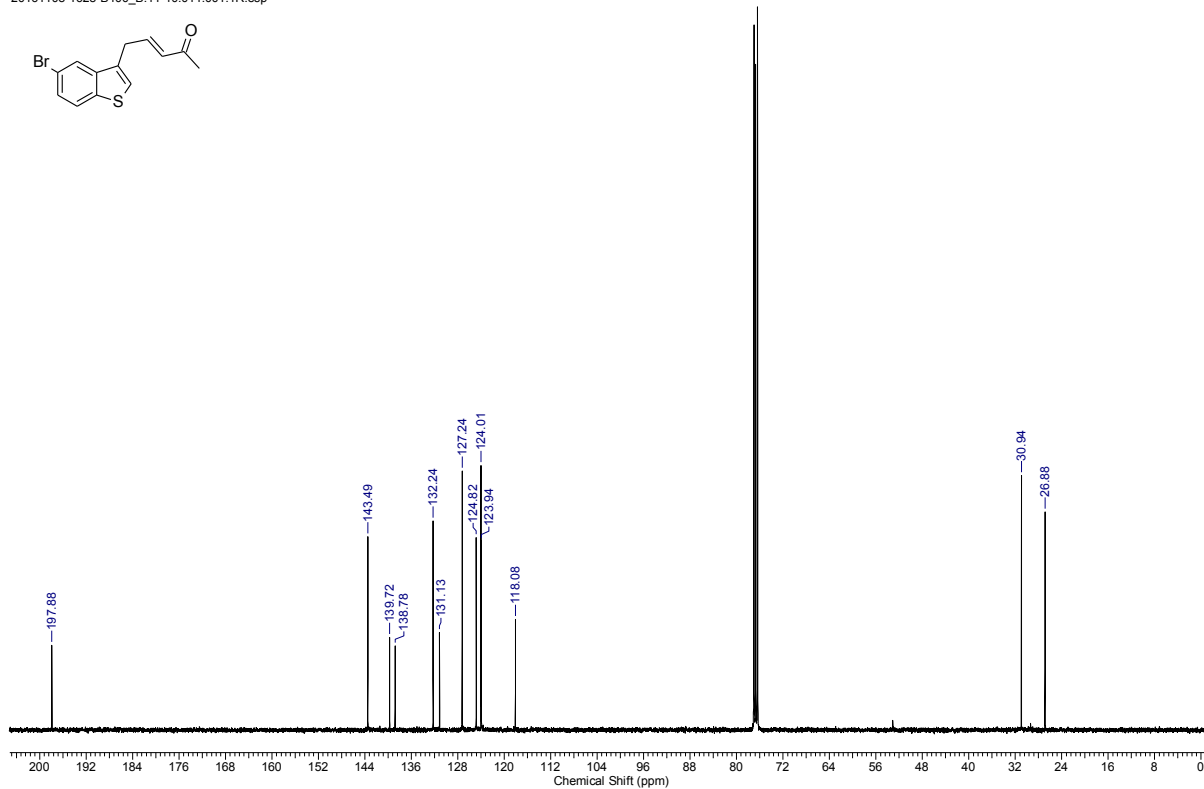

**Supplementary Figure 39.**  
**6h**  $^1\text{H}$  NMR (400 MHz,  $\text{CDCl}_3$ )

20161108-1716-B400\_B.11-40.010.001.1R.esp

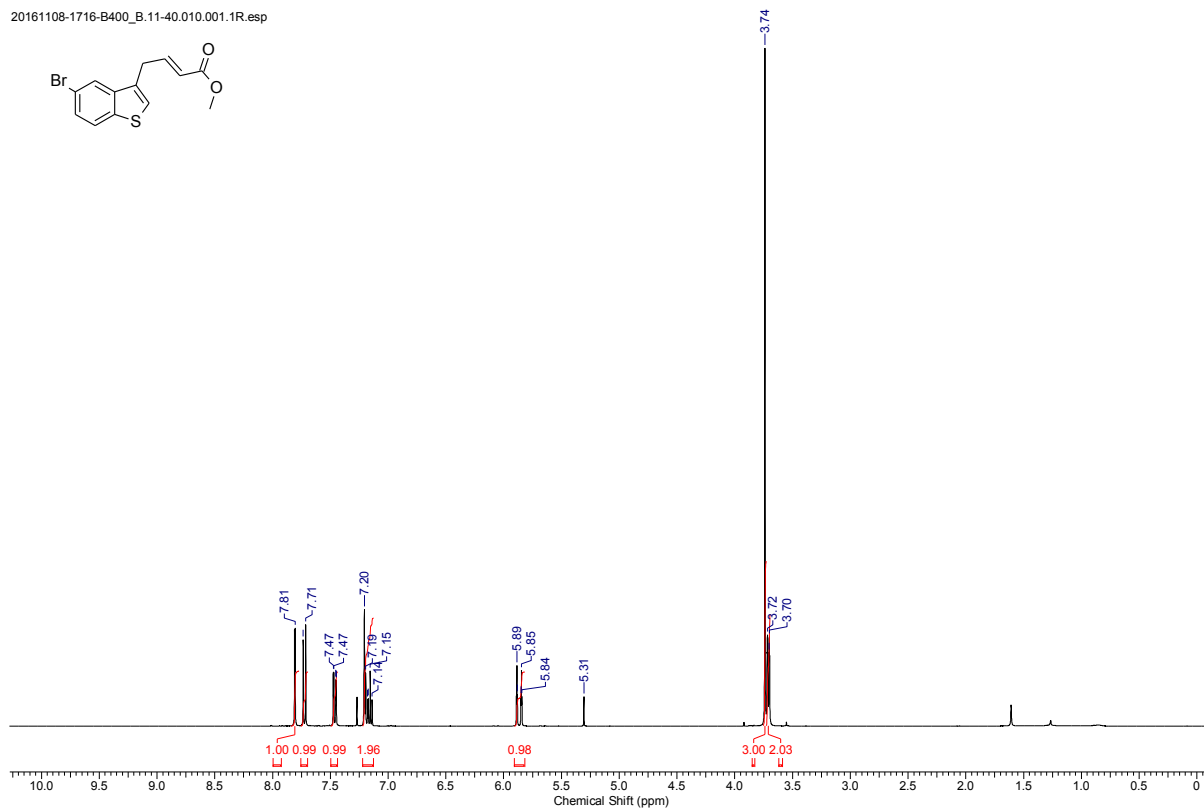

**6h**  $^{13}\text{C}$  NMR (101 MHz,  $\text{CDCl}_3$ )

20161108-1716-B400\_B.11-40.012.001.1R.esp

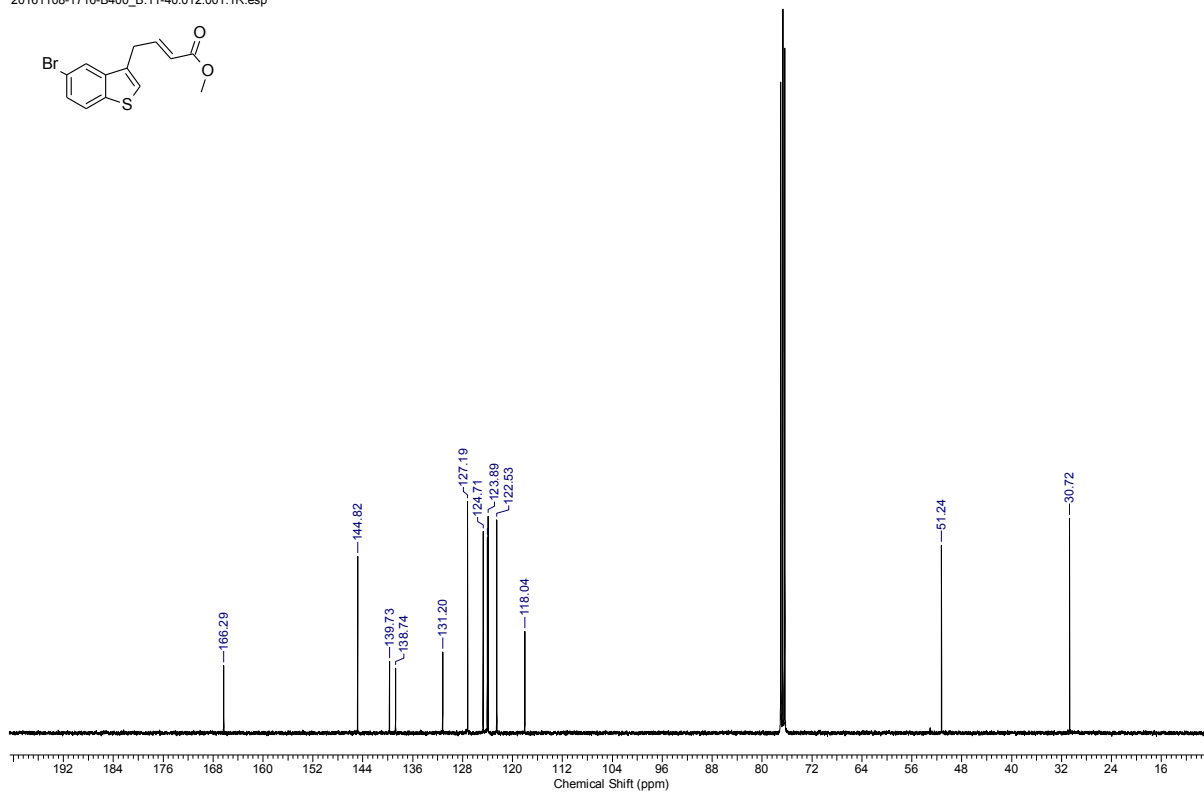

### Supplementary Figure 40.

#### 8a <sup>1</sup>H NMR (400 MHz, CDCl<sub>3</sub>)

HJS033-03-PROTON.ESP

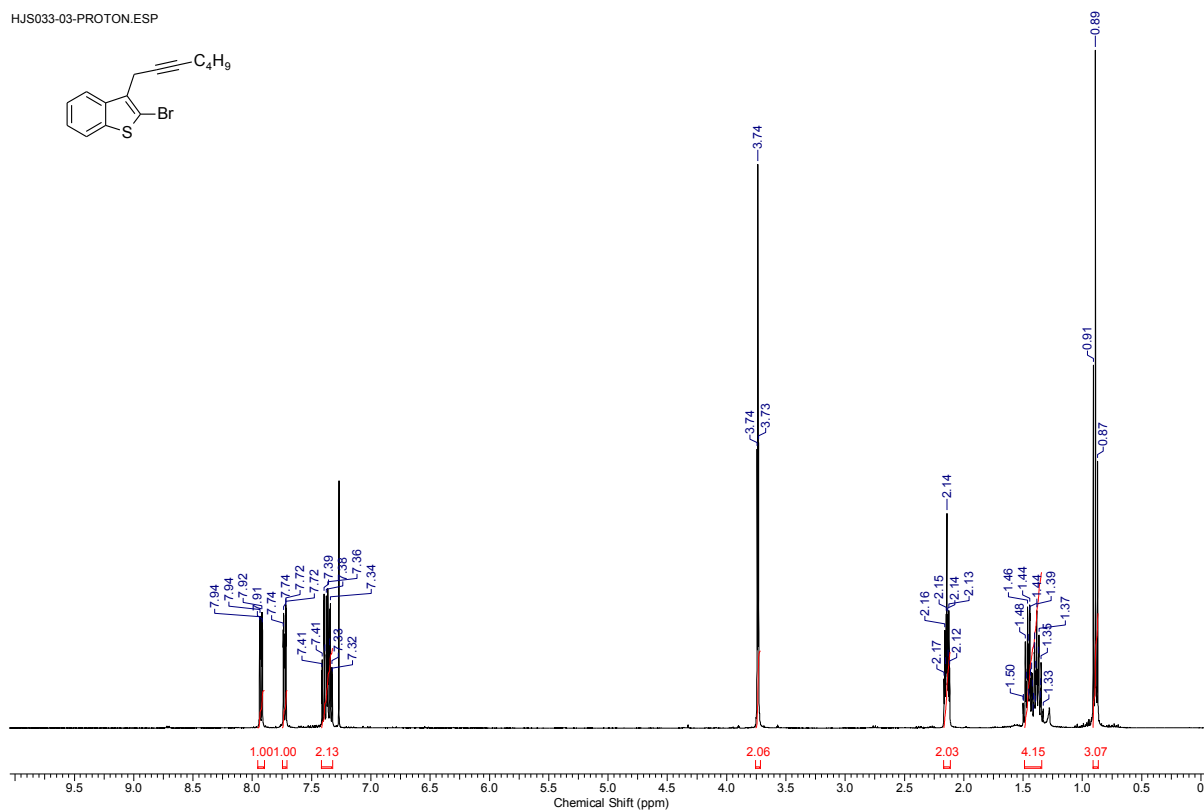

#### 8a <sup>13</sup>C NMR (101 MHz, CDCl<sub>3</sub>)

HJS033-03-CARBON.ESP

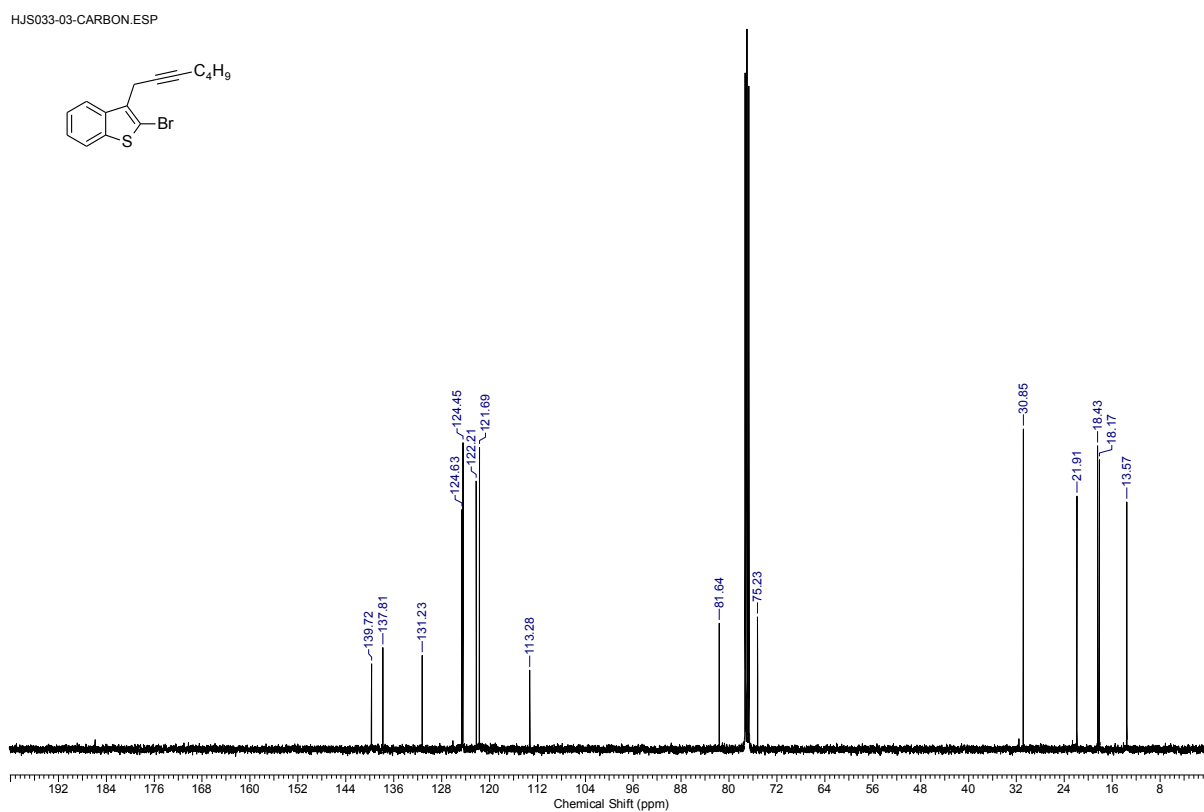

**Supplementary Figure 41.**  
**8b**  $^1\text{H}$  NMR (400 MHz,  $\text{CDCl}_3$ )

HJS039-03-PROTON.ESP

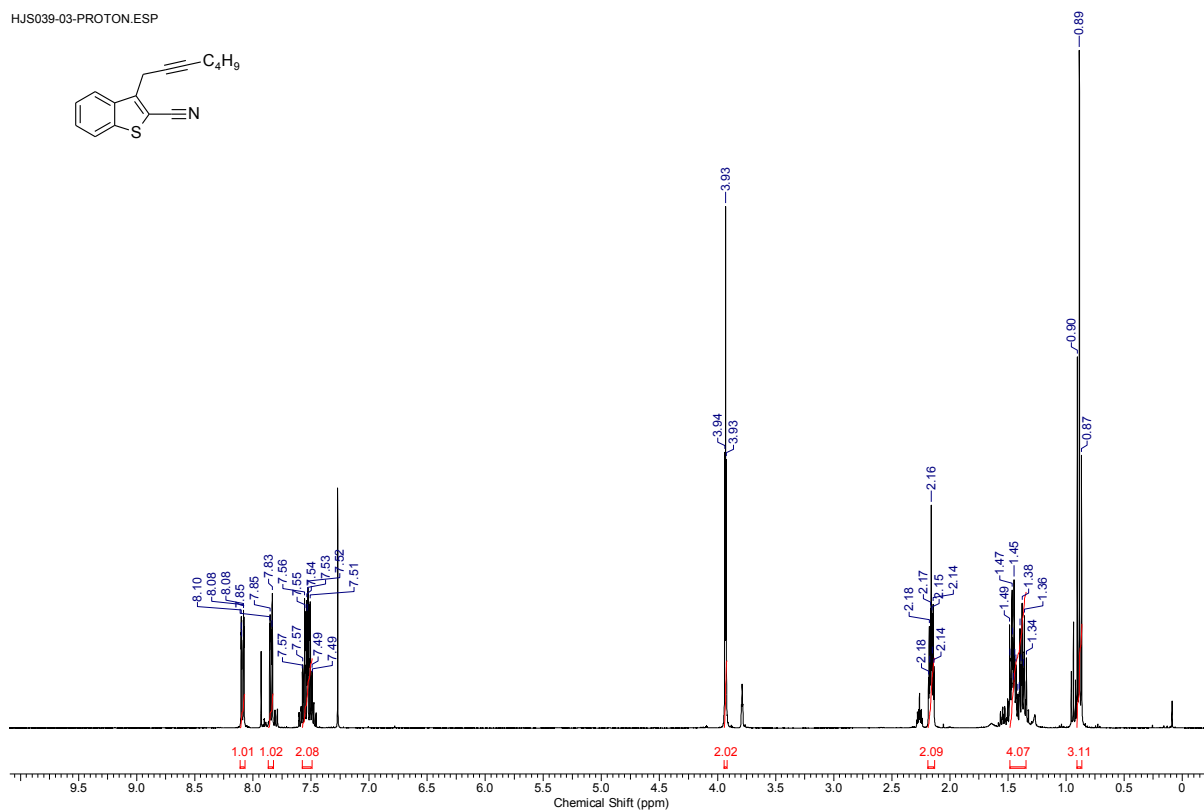

**8b**  $^{13}\text{C}$  NMR (101 MHz,  $\text{CDCl}_3$ )

HJS039-03-CARBON.ESP

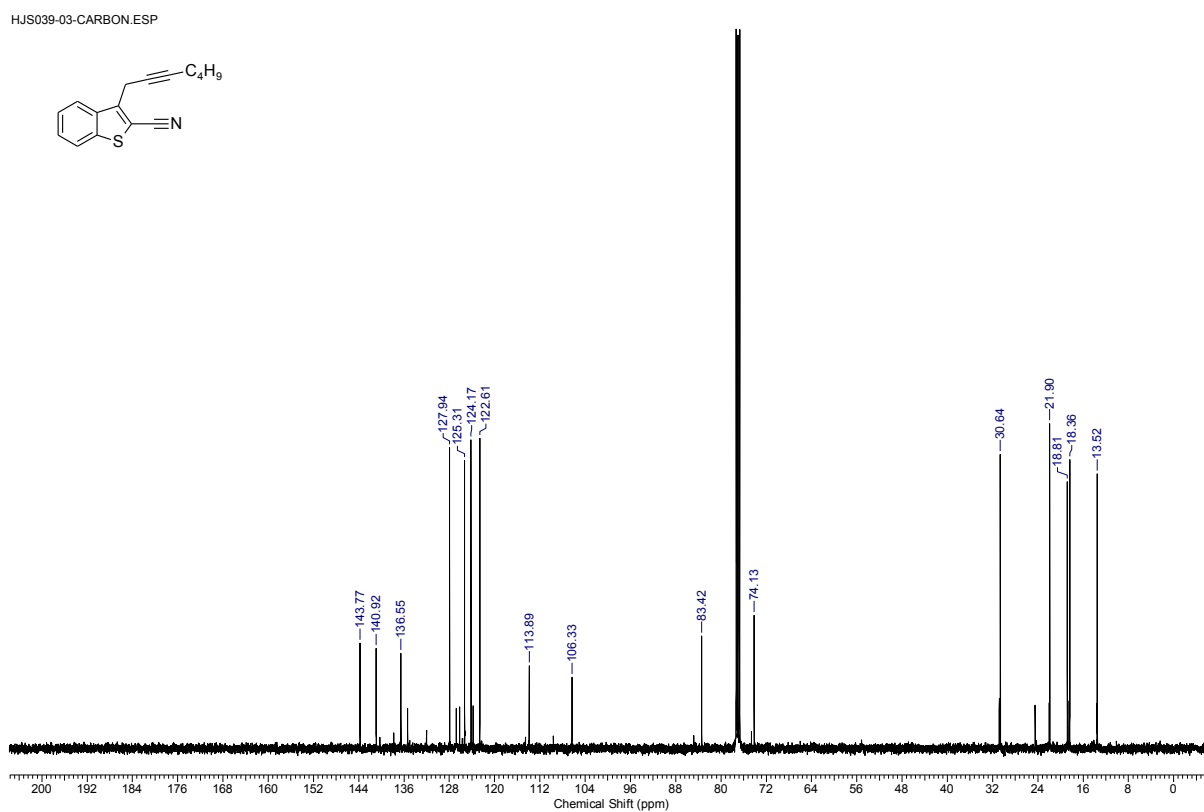

**Supplementary Figure 42.**  
**8c**  $^1\text{H}$  NMR (400 MHz,  $\text{CDCl}_3$ )

HJS040-03-PROTON.ESP

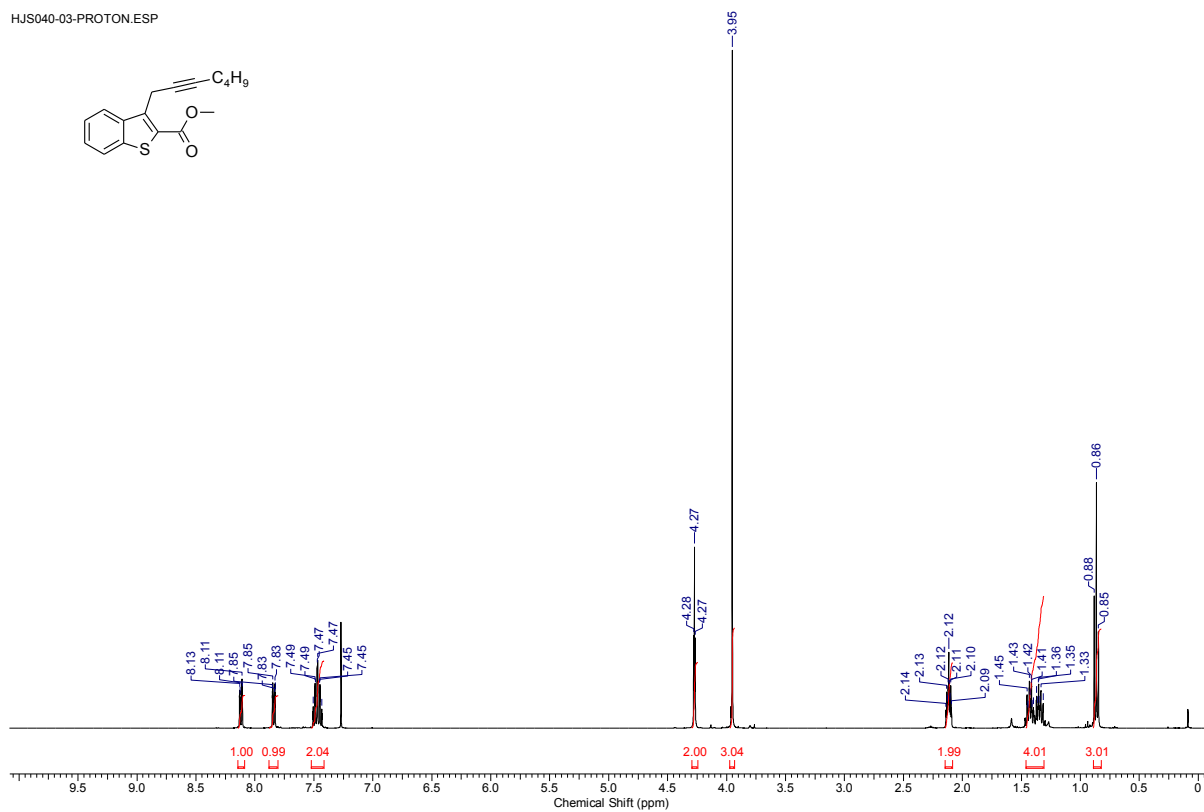

**8c**  $^{13}\text{C}$  NMR (101 MHz,  $\text{CDCl}_3$ )

HJS040-03-CARBON.ESP

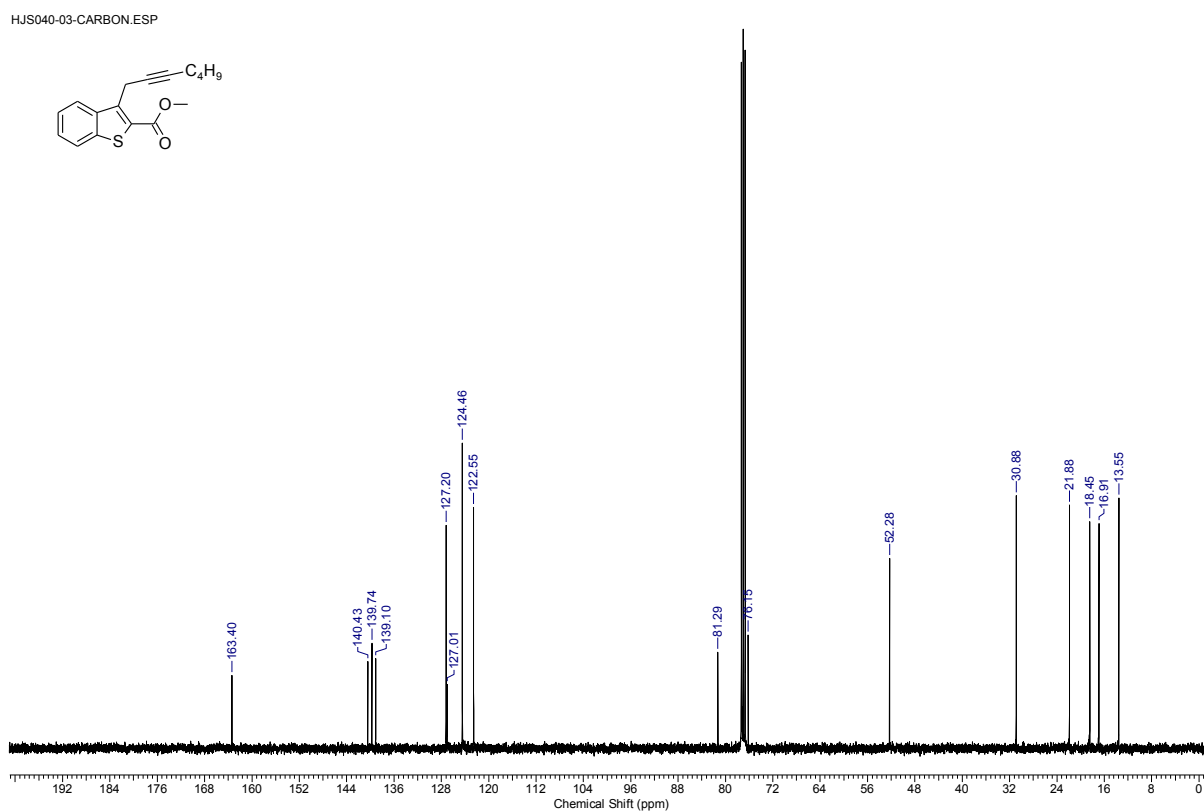

**Supplementary Figure 43.**  
**8d**  $^1\text{H}$  NMR (400 MHz,  $\text{CDCl}_3$ )

HJS021-04-PROTON.ESP

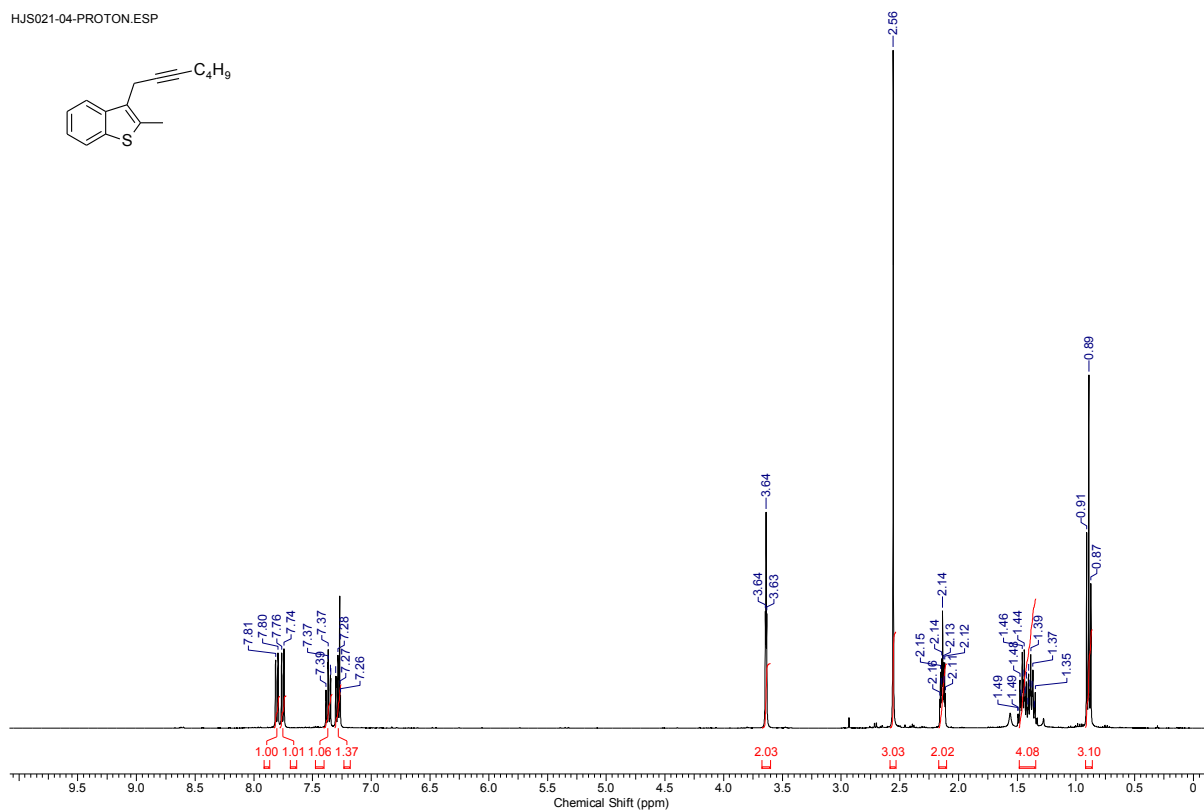

**8d**  $^{13}\text{C}$  NMR (101 MHz,  $\text{CDCl}_3$ )

HJS021-04-CARBON.ESP

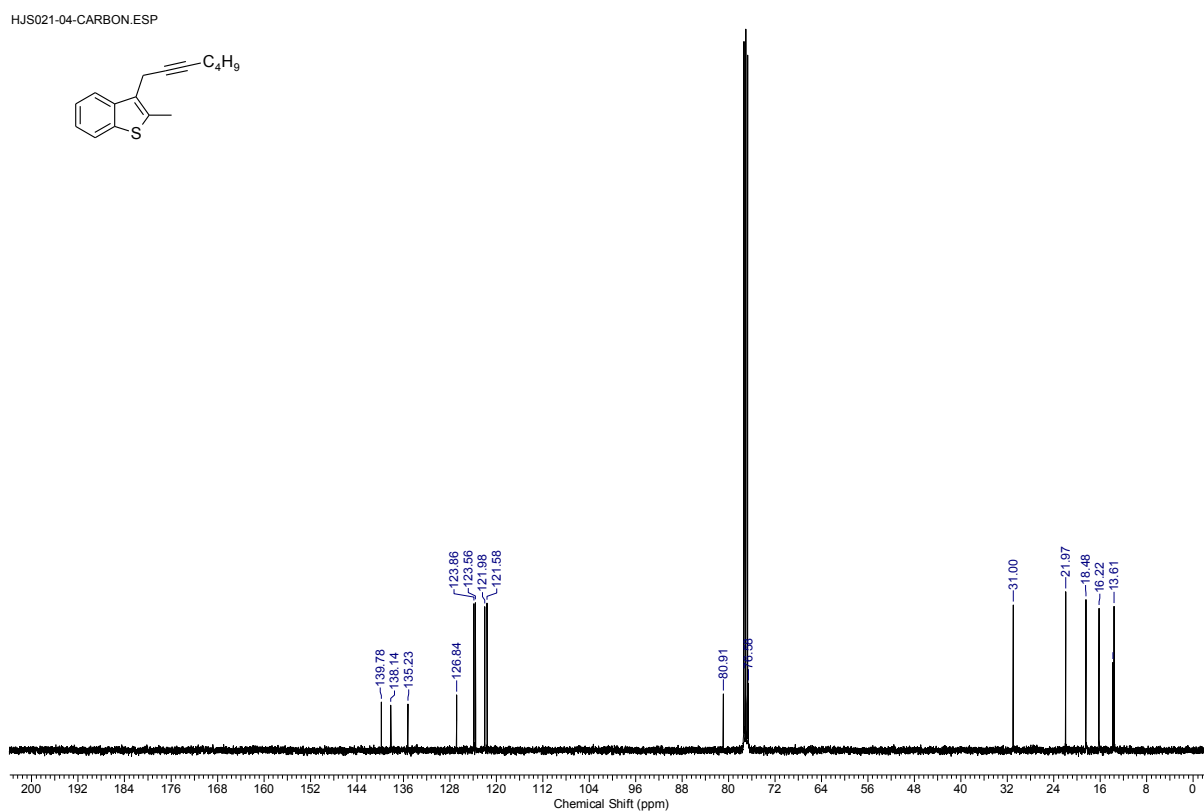

**Supplementary Figure 44.**  
**8e**  $^1\text{H}$  NMR (400 MHz,  $\text{CDCl}_3$ )

HJS207-PROTON.ESP

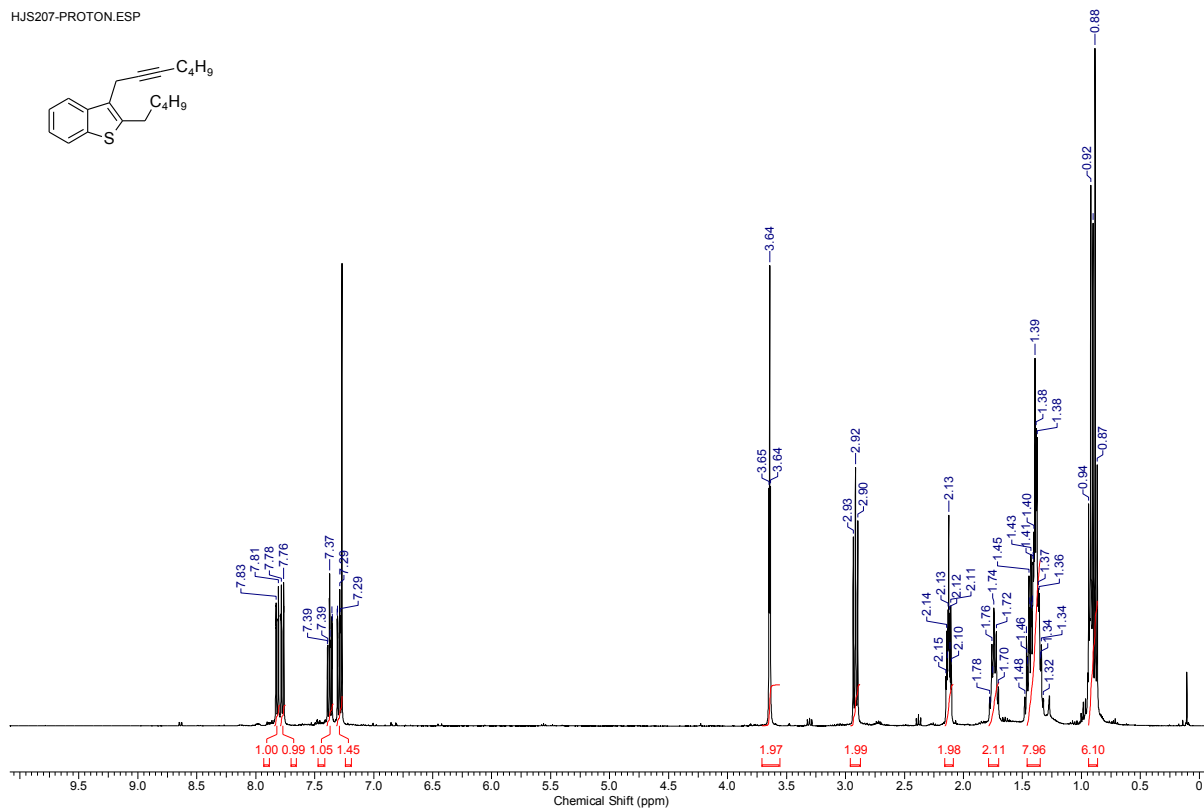

**8e**  $^{13}\text{C}$  NMR (101 MHz,  $\text{CDCl}_3$ )

HJS207-CARBON.ESP

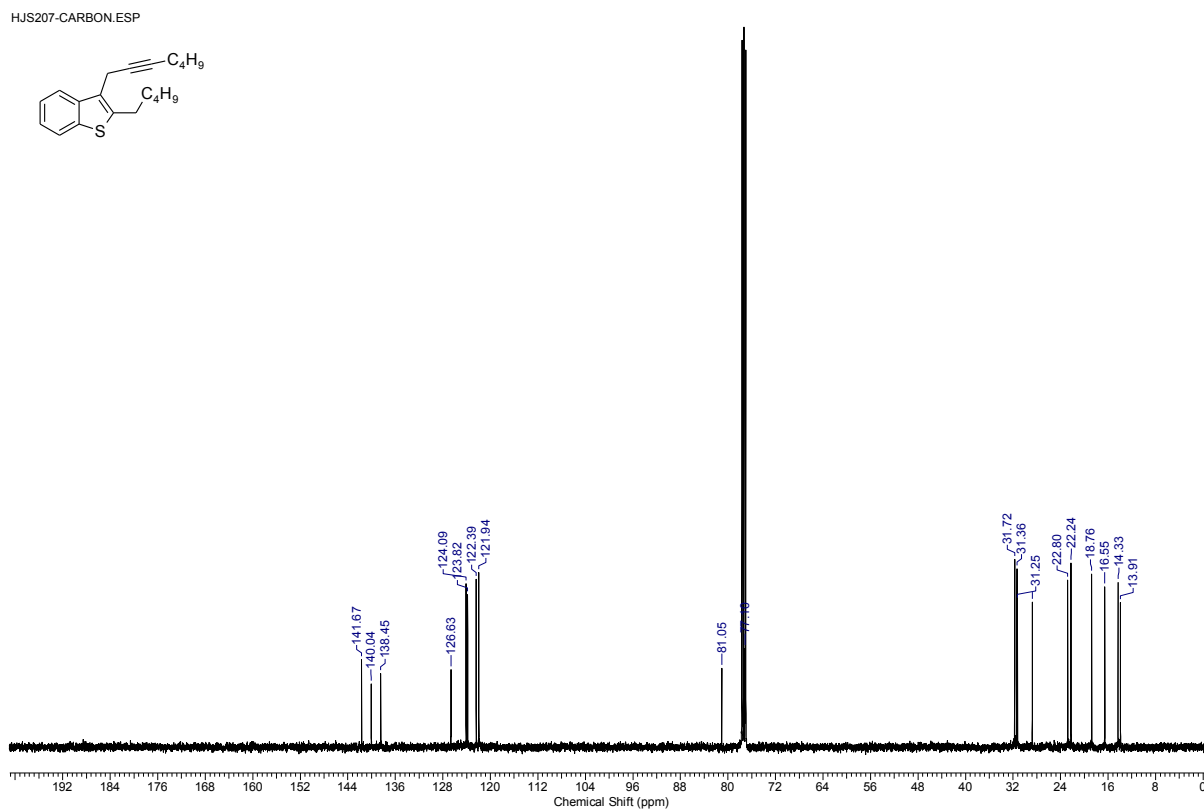



**Supplementary Figure 45.**  
**8f**  $^1\text{H}$  NMR (400 MHz,  $\text{CDCl}_3$ )

HJS042-03-PROTON.ESP

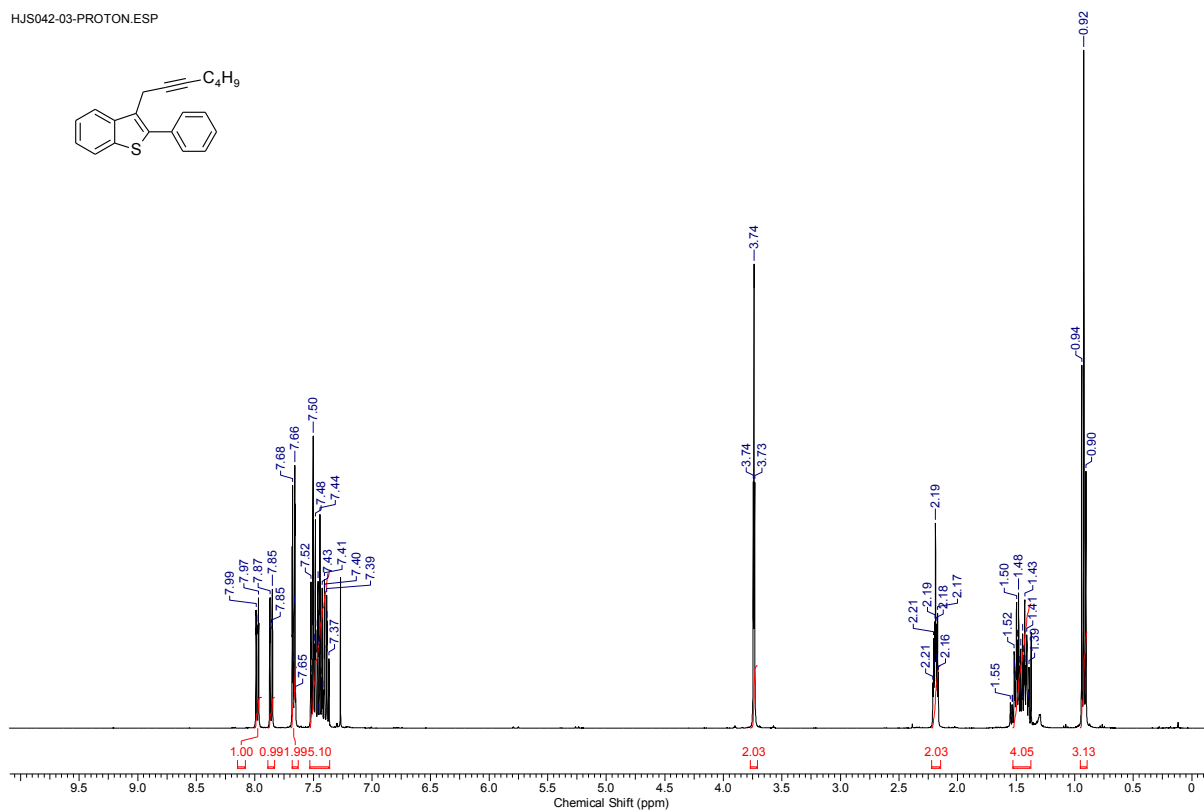

**8f**  $^{13}\text{C}$  NMR (101 MHz,  $\text{CDCl}_3$ )

HJS042-03-CARBON.ESP

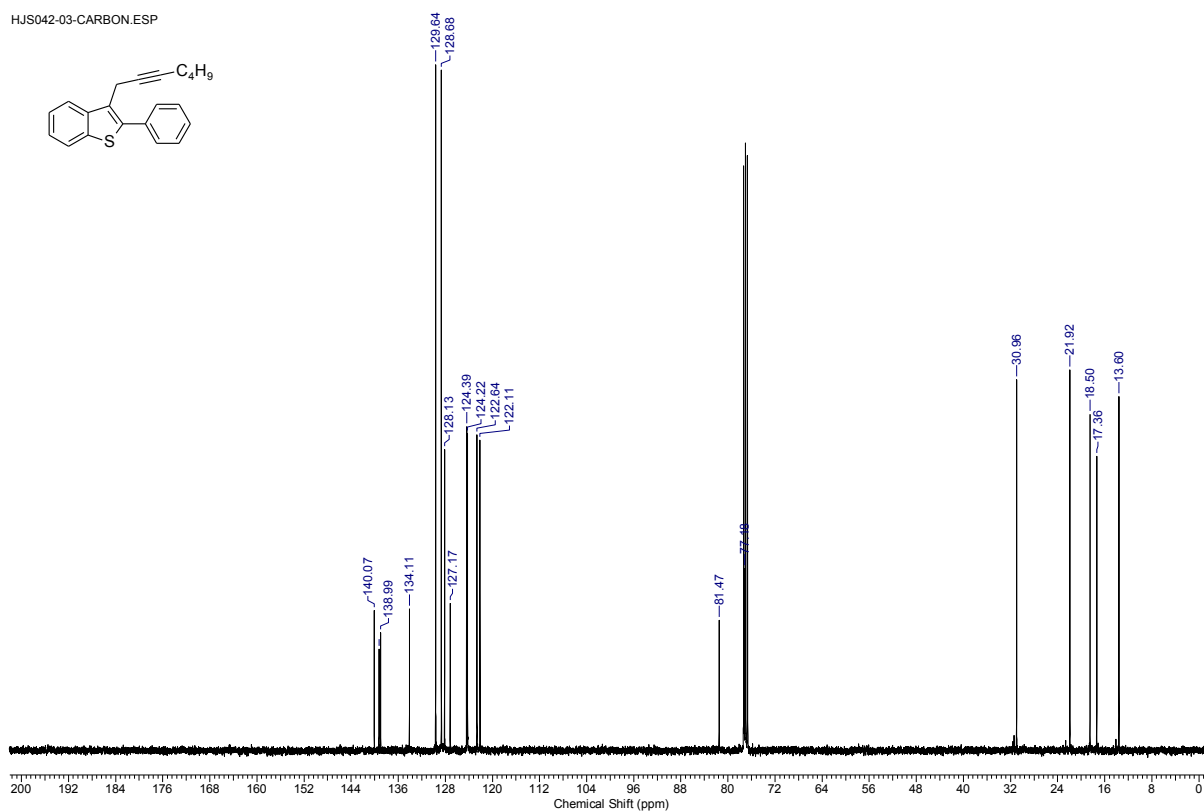

### Supplementary Figure 46.

### 8g <sup>1</sup>H NMR (400 MHz, CDCl<sub>3</sub>)

20161020-1649-B400\_B.11-30.010.001.1r.esp

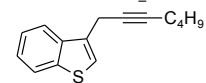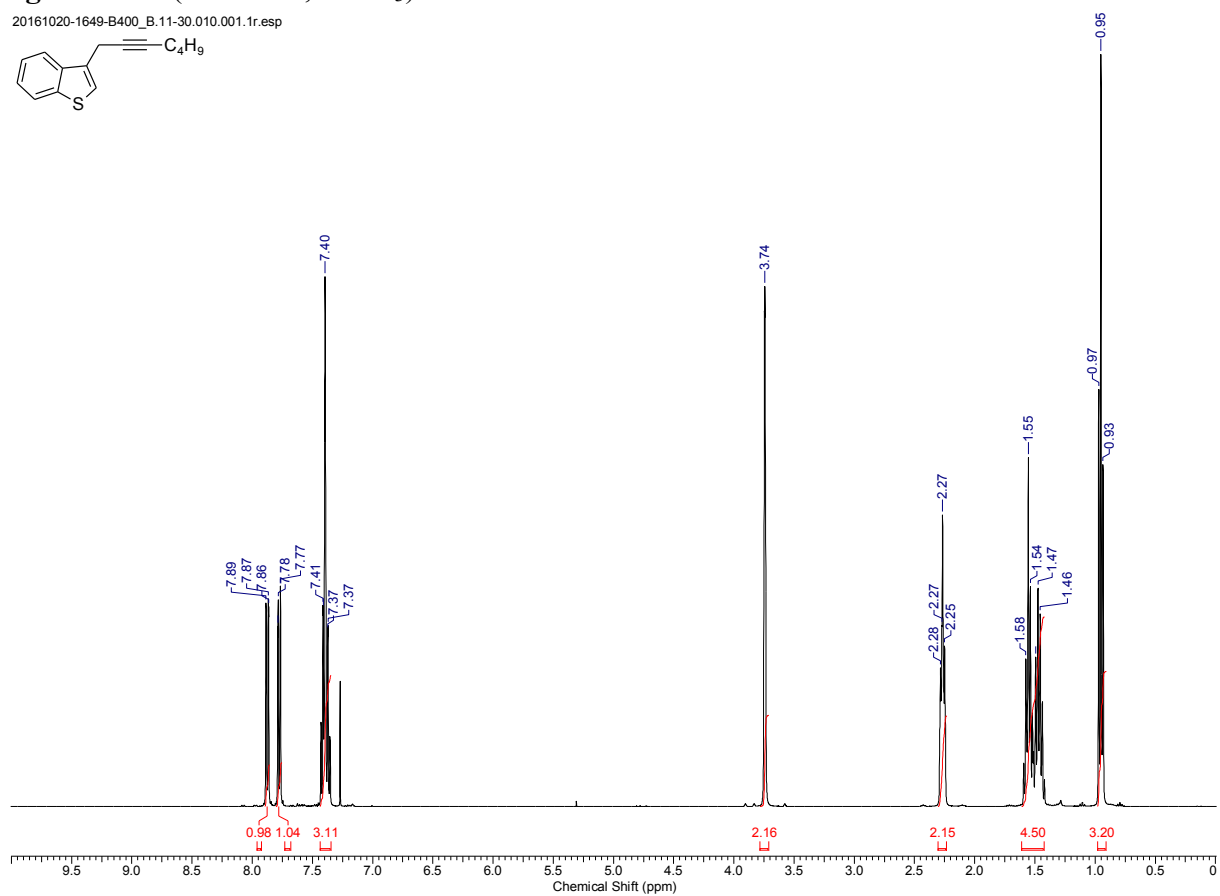

### 8g <sup>13</sup>C NMR (101 MHz, CDCl<sub>3</sub>)

20161020-1649-B400\_B.11-30.012.001.1r.esp

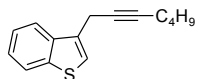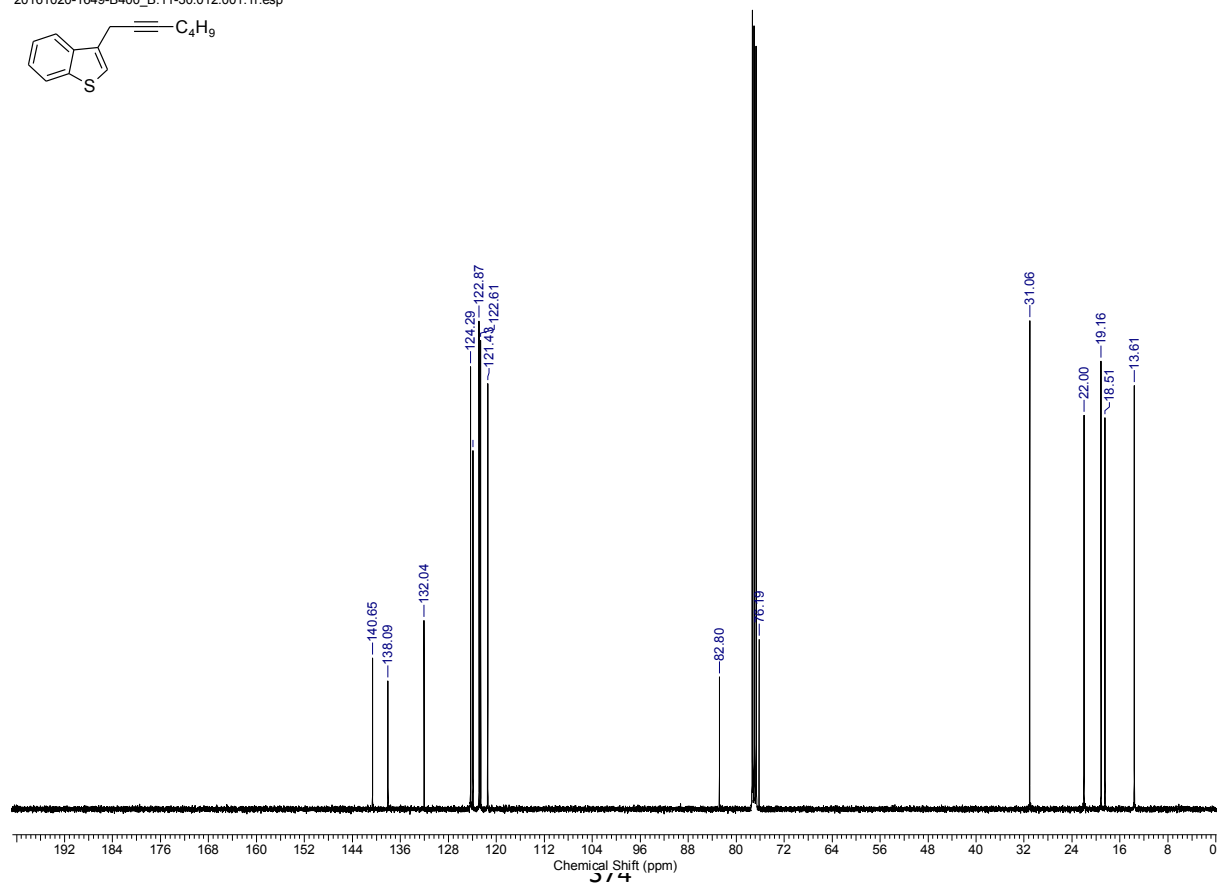

### Supplementary Figure 47.

#### 8h <sup>1</sup>H NMR (400 MHz, CDCl<sub>3</sub>)

HJS134-03-PROTON.ESP

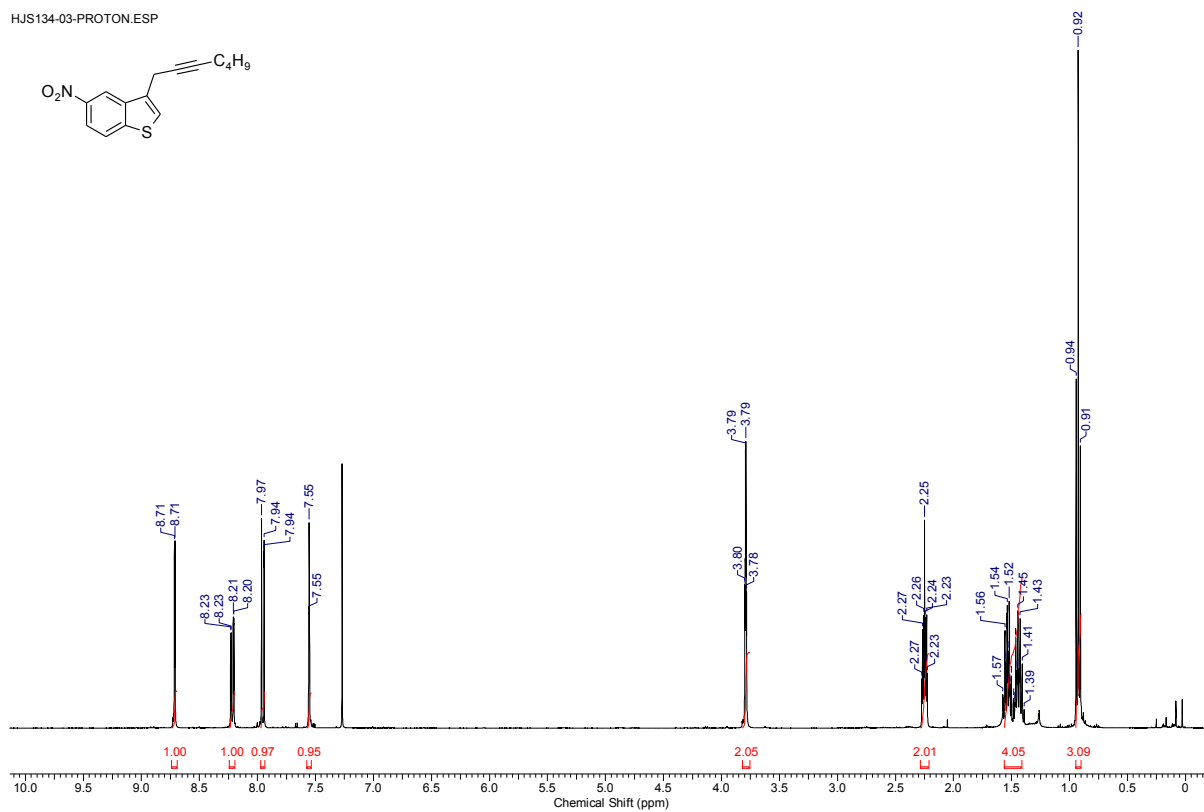

#### 8h <sup>13</sup>C NMR (101 MHz, CDCl<sub>3</sub>)

HJS134-03-CARBON.ESP

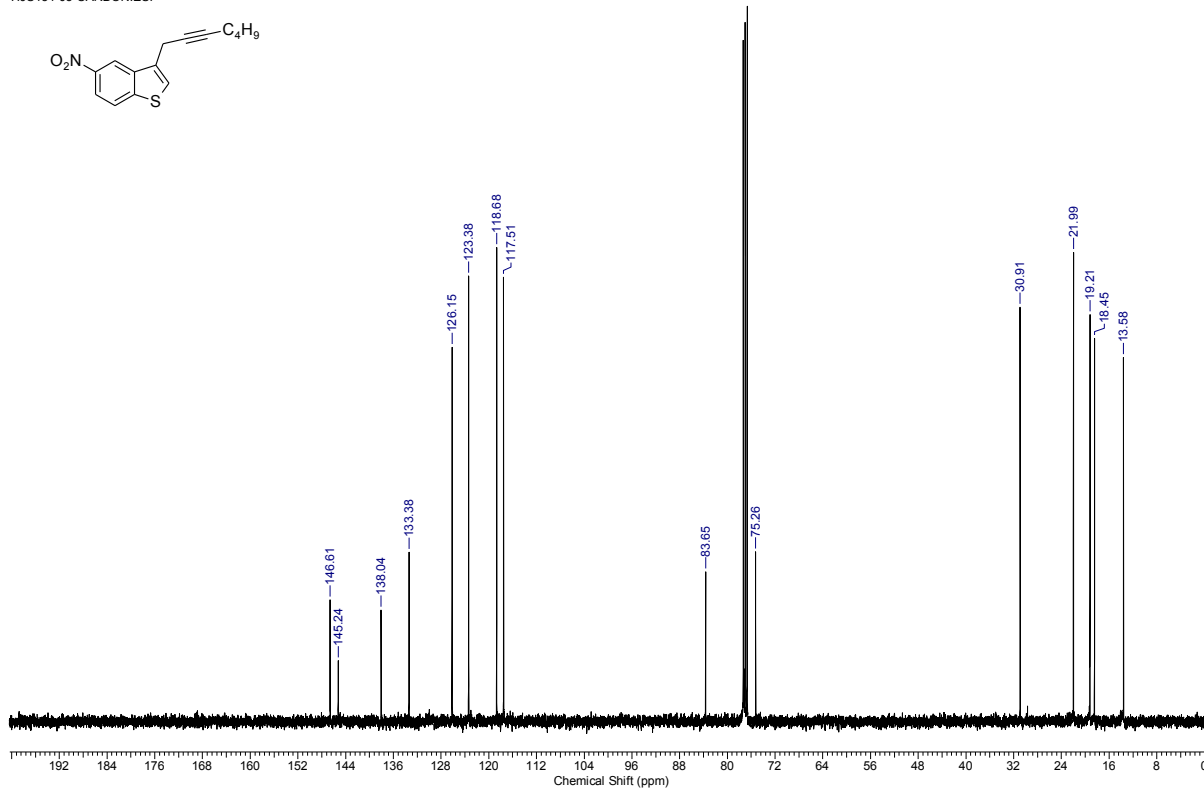

**Supplementary Figure 48.**  
**8i**  $^1\text{H}$  NMR (400 MHz,  $\text{CDCl}_3$ )

HJS093-03.esp

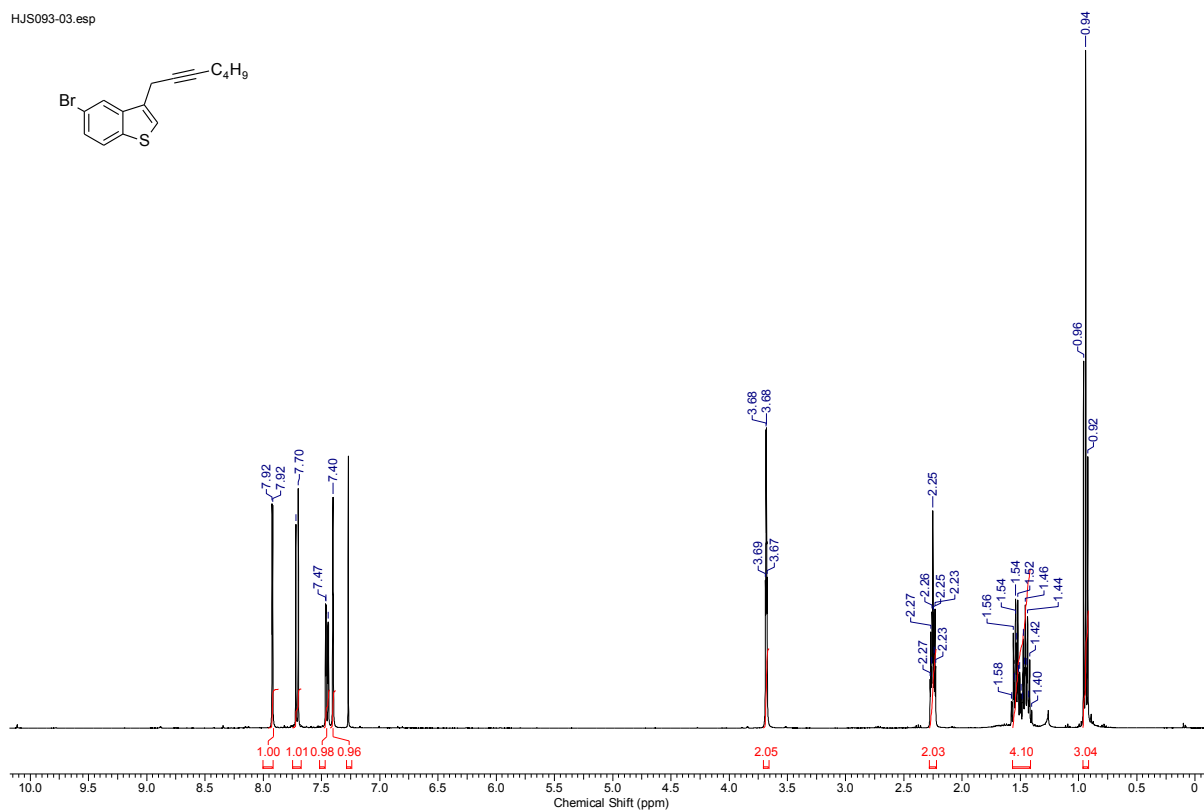

**8i**  $^{13}\text{C}$  NMR (101 MHz,  $\text{CDCl}_3$ )

HJS090-03-CARBON.ESP

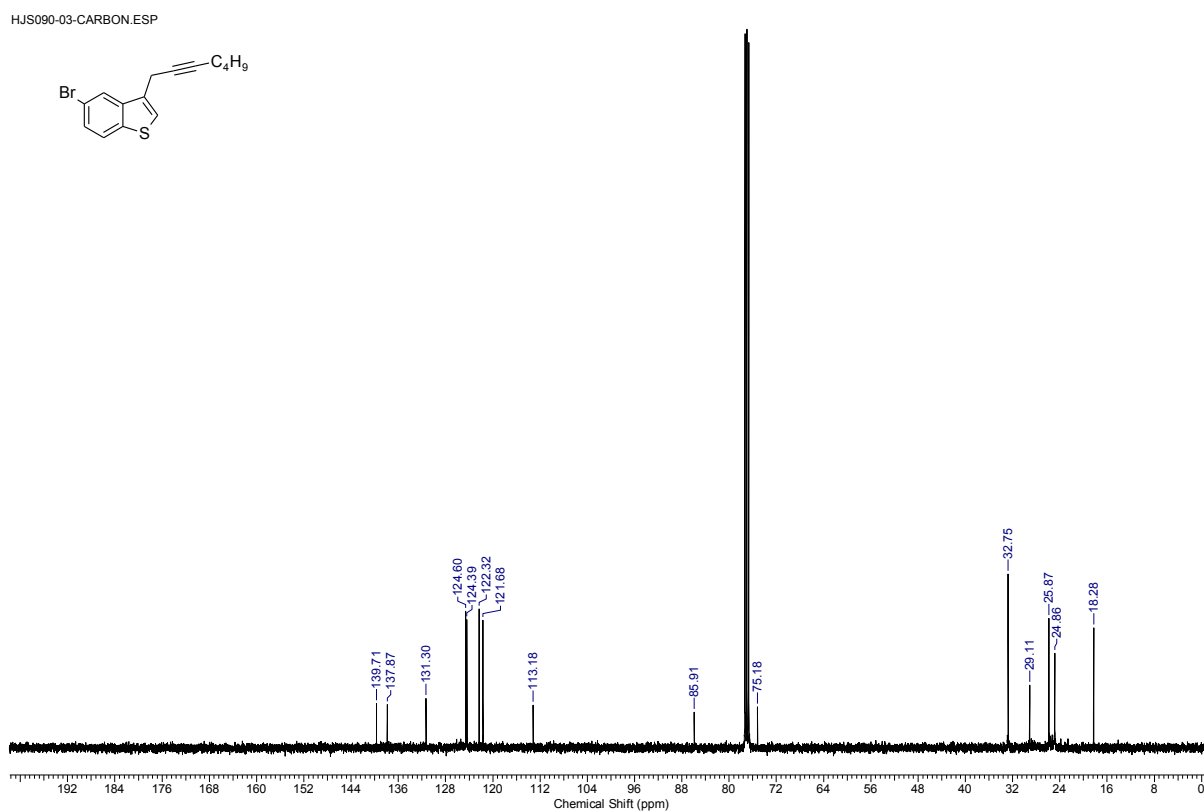

**Supplementary Figure 49.**  
**8j**  $^1\text{H}$  NMR (400 MHz,  $\text{CDCl}_3$ )

HJS133-03-PROTON.ESP

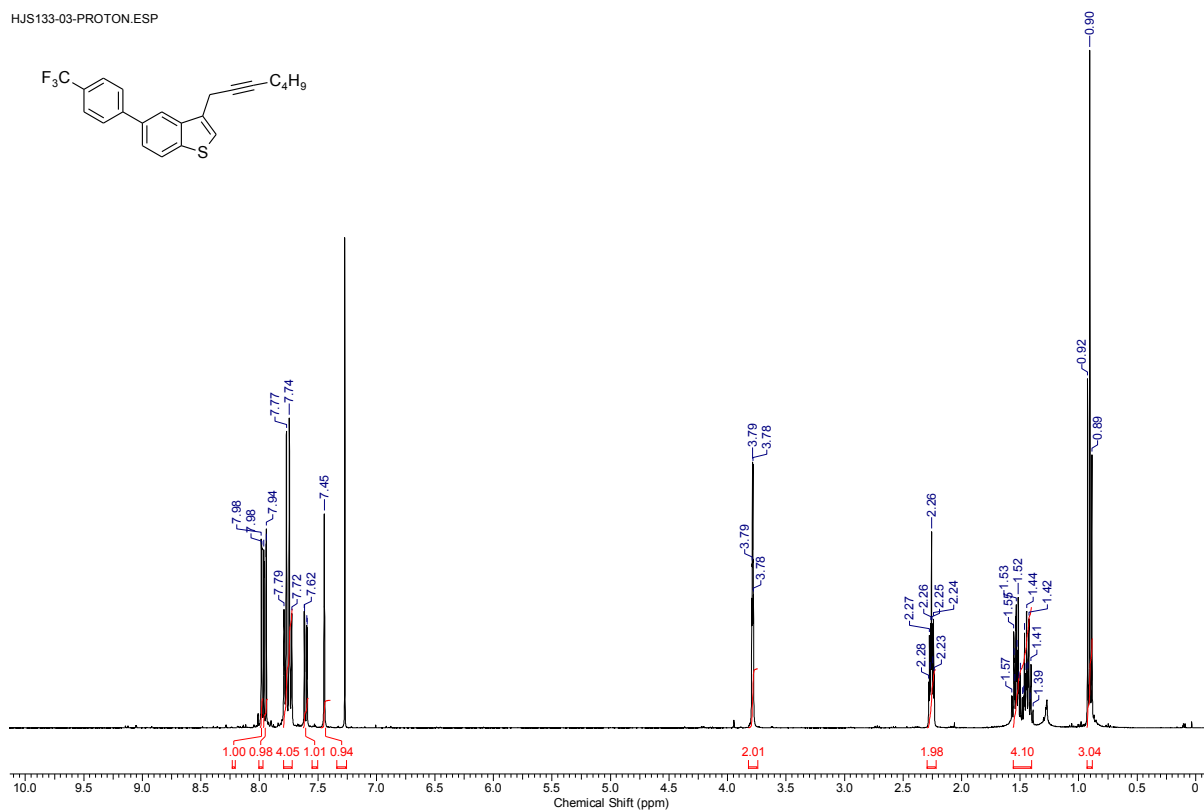

**8j**  $^{13}\text{C}$  NMR (101 MHz,  $\text{CDCl}_3$ )

HJS133-03-CARBON.ESP

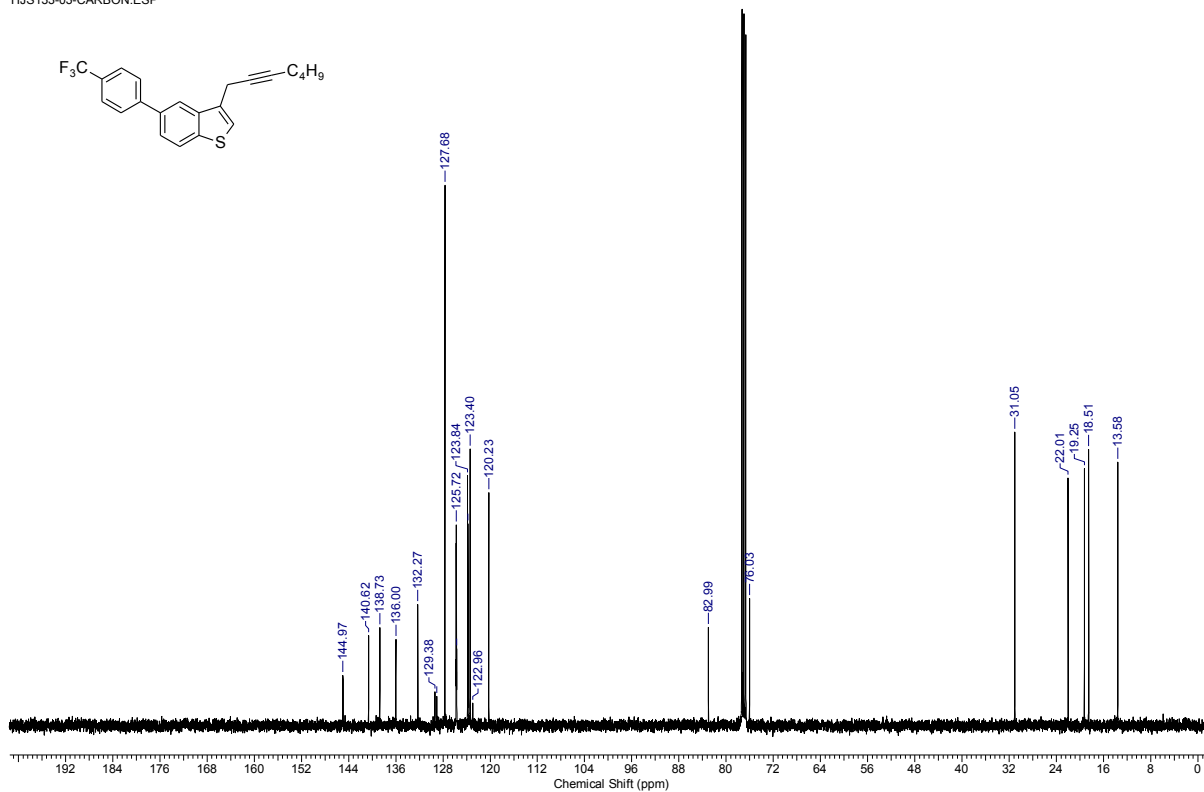

**Supplementary Figure 50.**  
**8k**  $^1\text{H}$  NMR (400 MHz,  $\text{CDCl}_3$ )

HJS013-03-PROTON.ESP

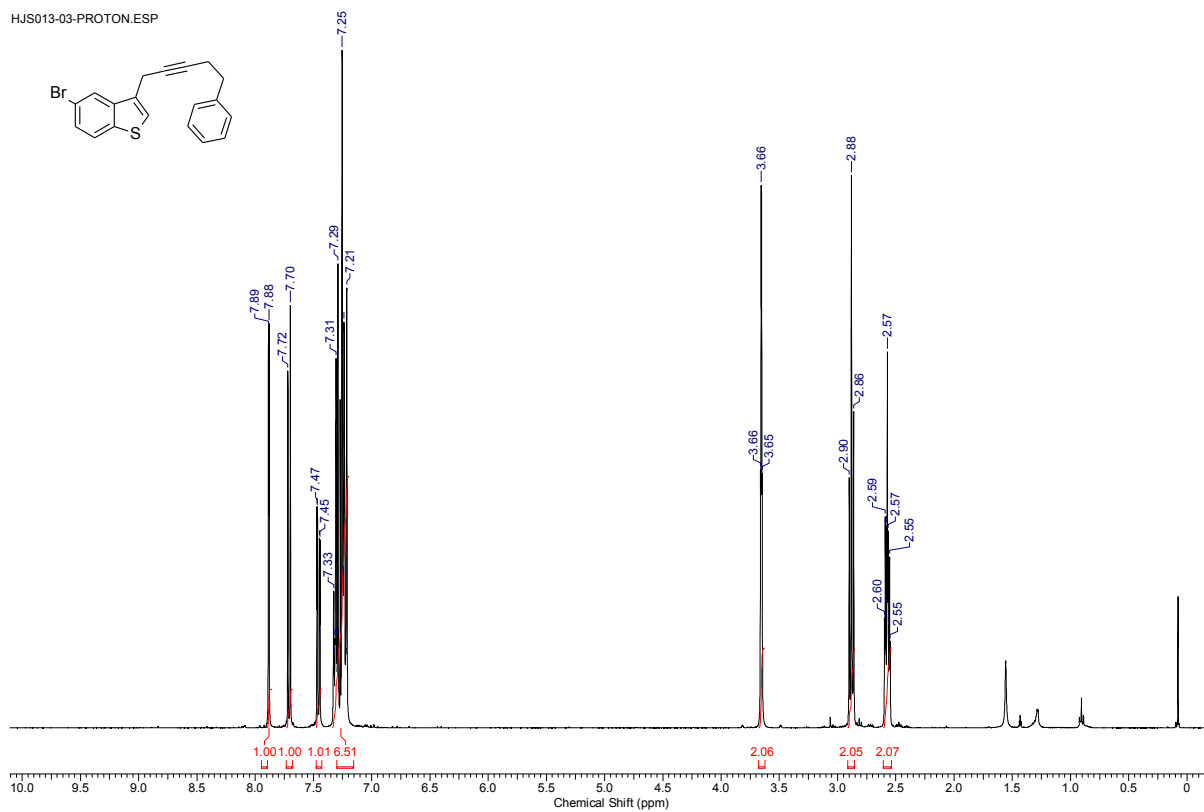

**8k**  $^{13}\text{C}$  NMR (101 MHz,  $\text{CDCl}_3$ )

HJS013-03-CARBON.ESP

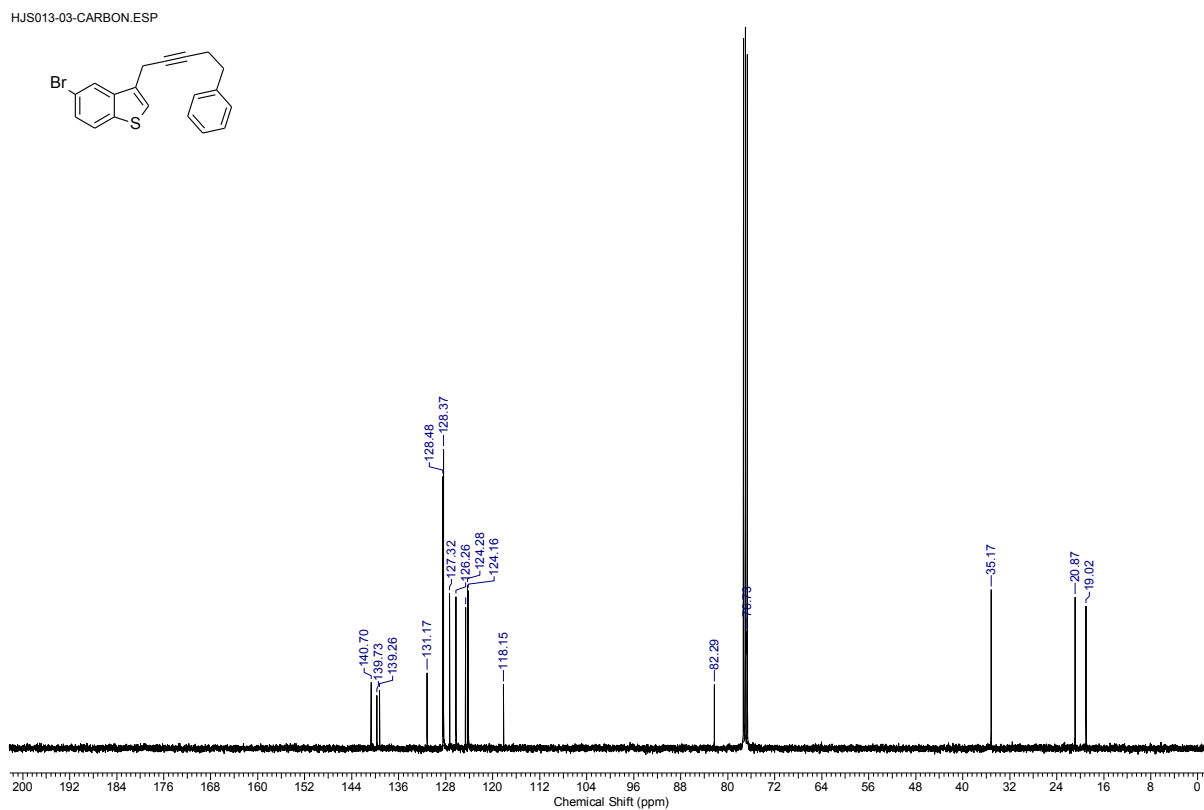

**Supplementary Figure 51.**  
**8I**  $^1\text{H}$  NMR (400 MHz,  $\text{CDCl}_3$ )

HJS038-04-Proton.esp

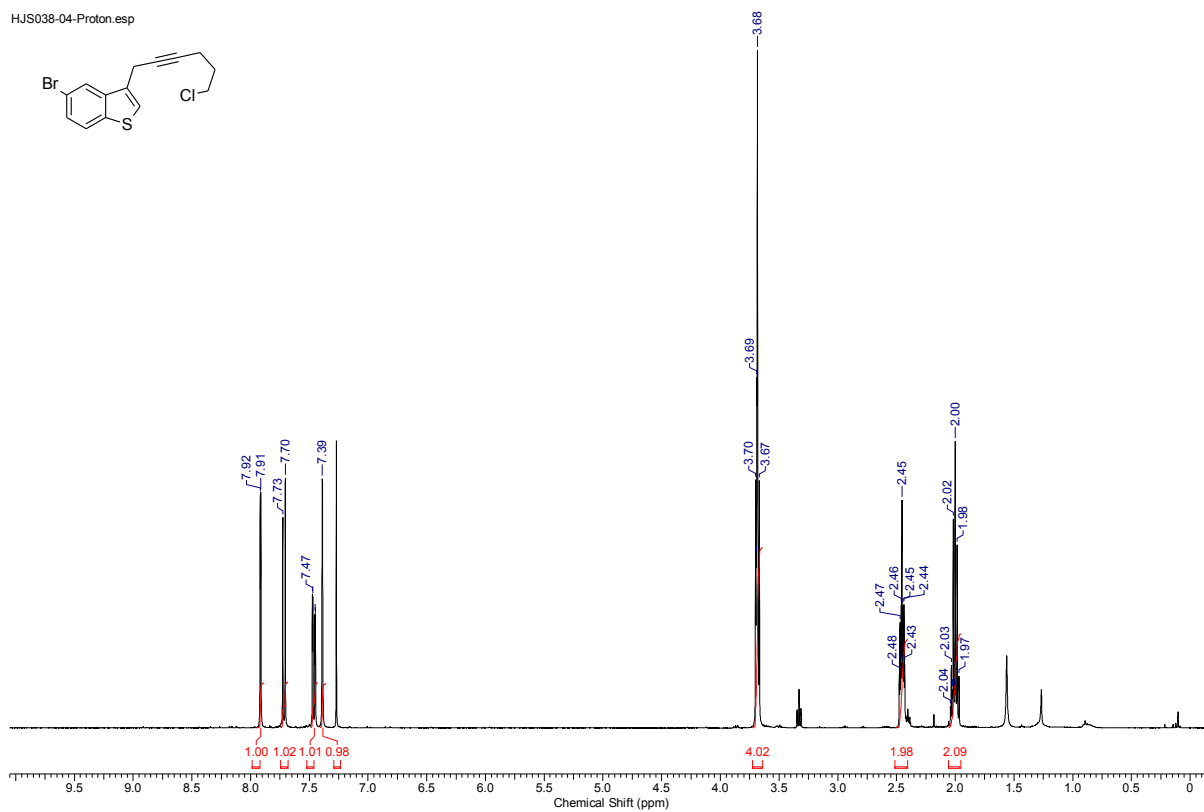

**8I**  $^{13}\text{C}$  NMR (101 MHz,  $\text{CDCl}_3$ )

HJS038-04-Carbon.esp

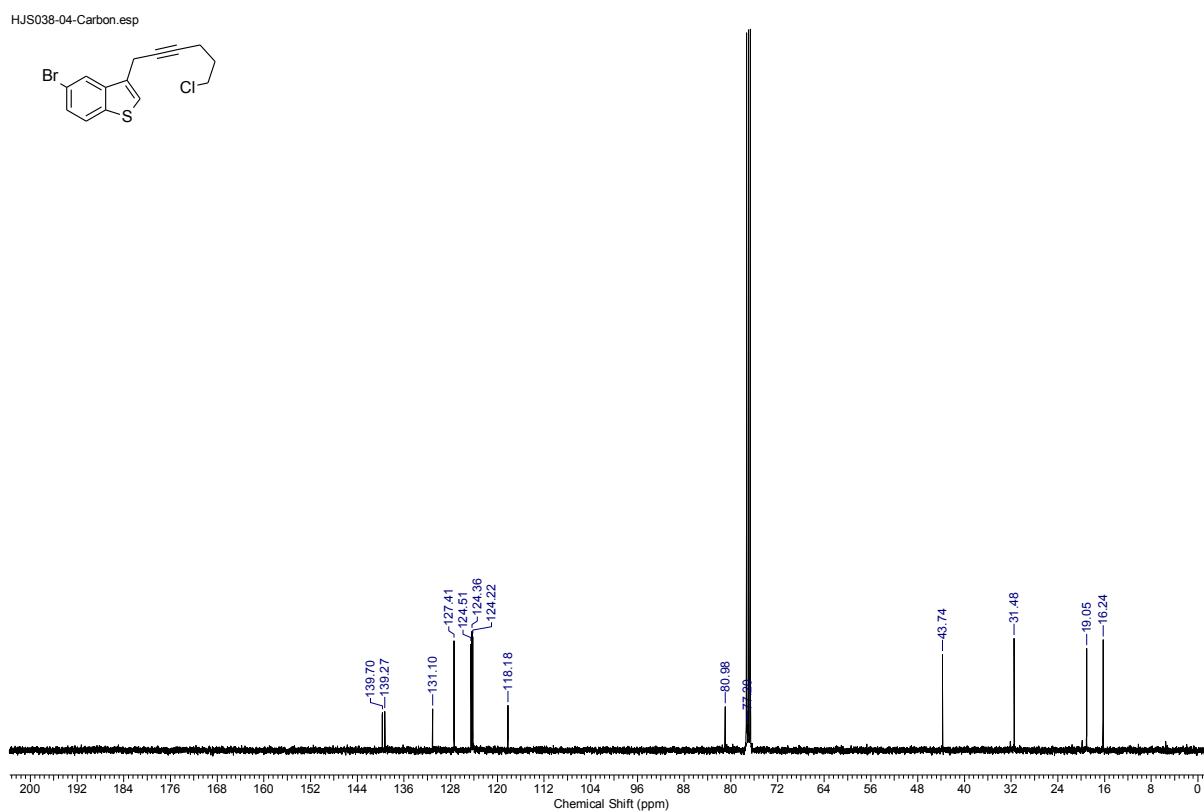

### Supplementary Figure 52.

**8m**  $^1\text{H}$  NMR (400 MHz,  $\text{CDCl}_3$ )

HJS015-04-PROTON.ESP

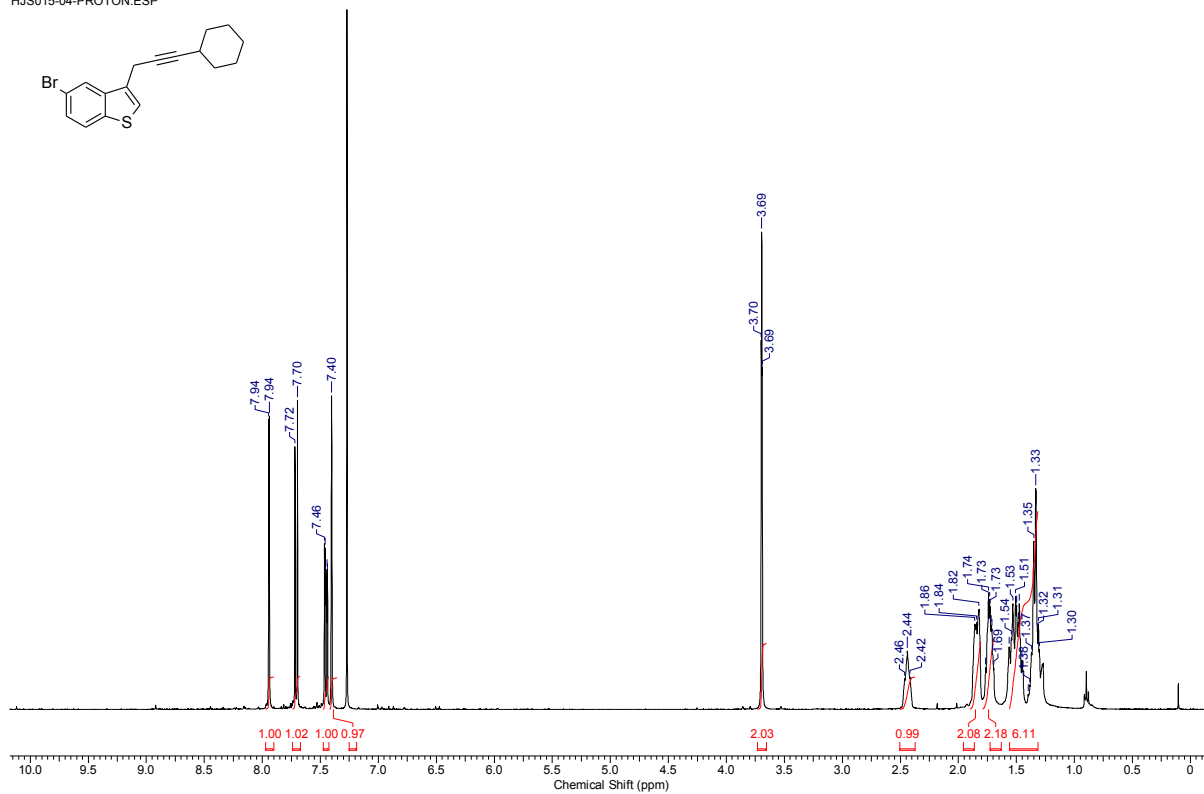

### **8m** $^{13}\text{C}$ NMR (101 MHz, $\text{CDCl}_3$ )

HJS015-04-CARBON.ESP

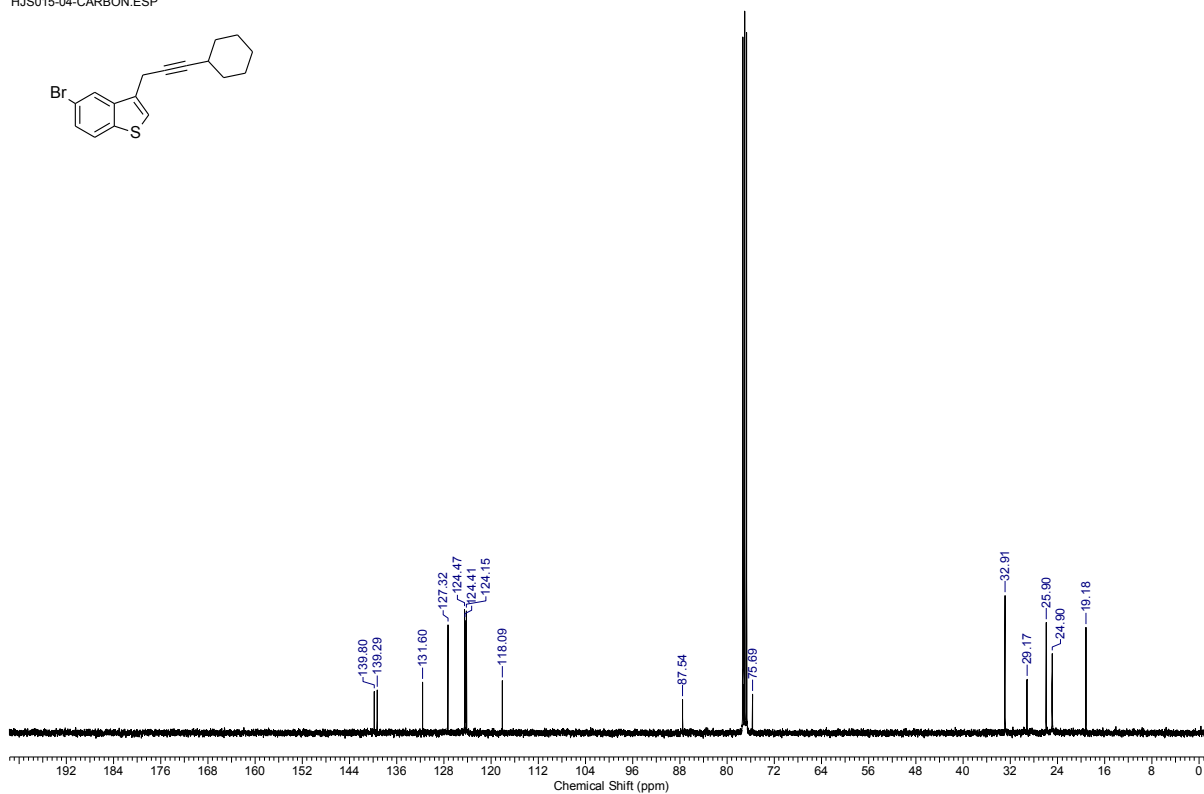



**Supplementary Figure 53.**  
**8n**  $^1\text{H}$  NMR (400 MHz,  $\text{CDCl}_3$ )

HJS030-04-PROTON.ESP

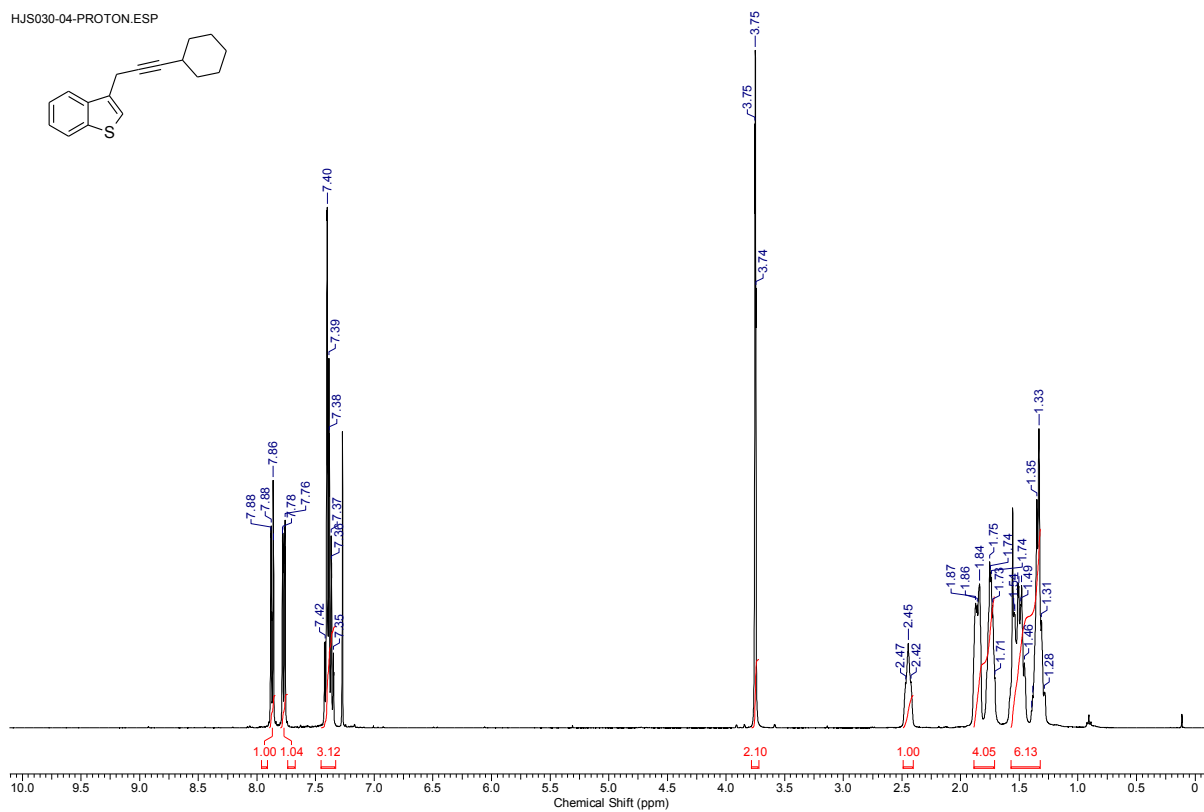

**8n**  $^{13}\text{C}$  NMR (101 MHz,  $\text{CDCl}_3$ )

HJS030-04-CARBON.ESP

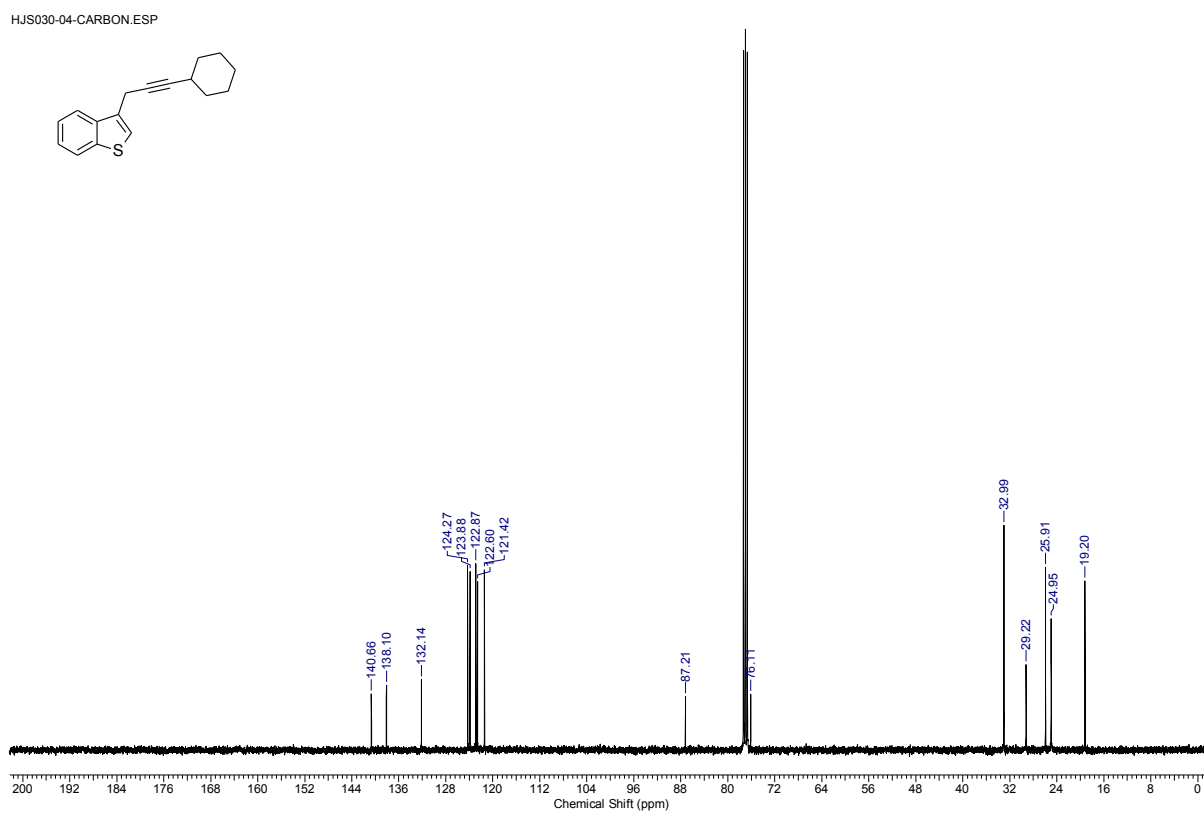

**Supplementary Figure 54.**  
**80**  $^1\text{H}$  NMR (400 MHz,  $\text{CDCl}_3$ )

HJS047-04-Proton.esp

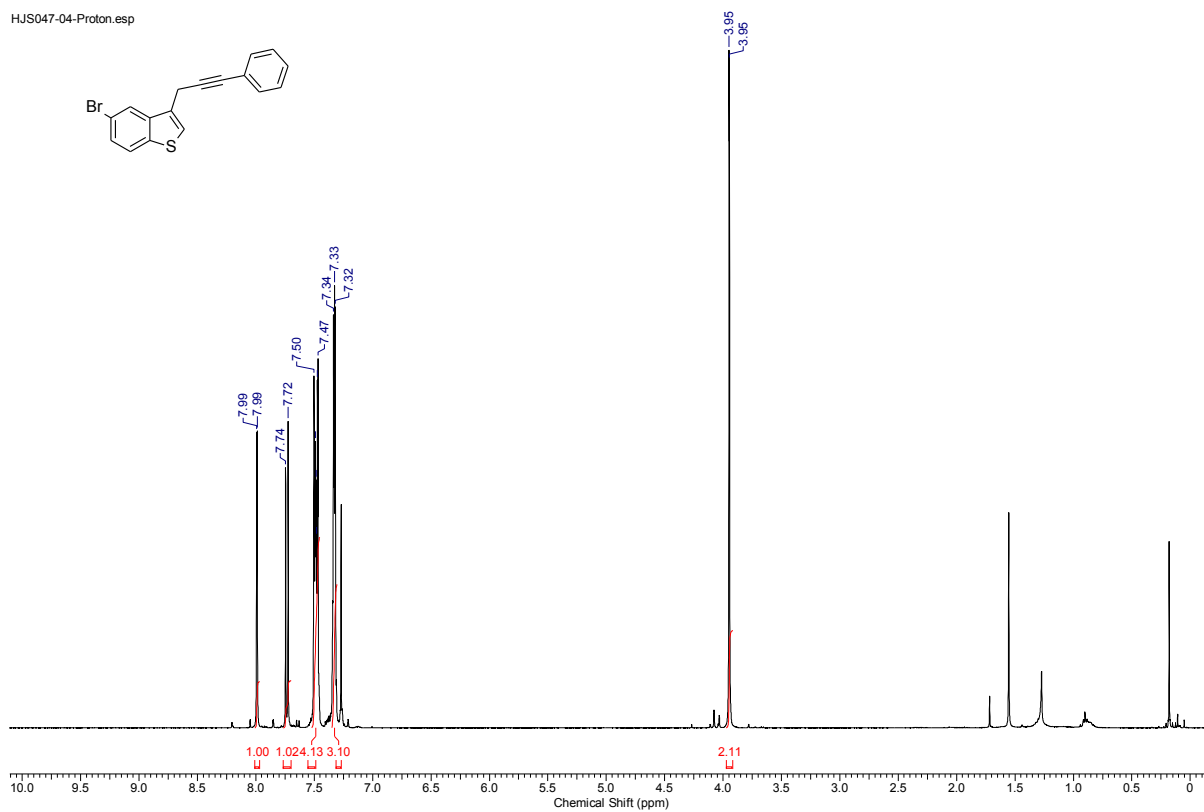

**80**  $^{13}\text{C}$  NMR (101 MHz,  $\text{CDCl}_3$ )

HJS047-04-Carbon.esp

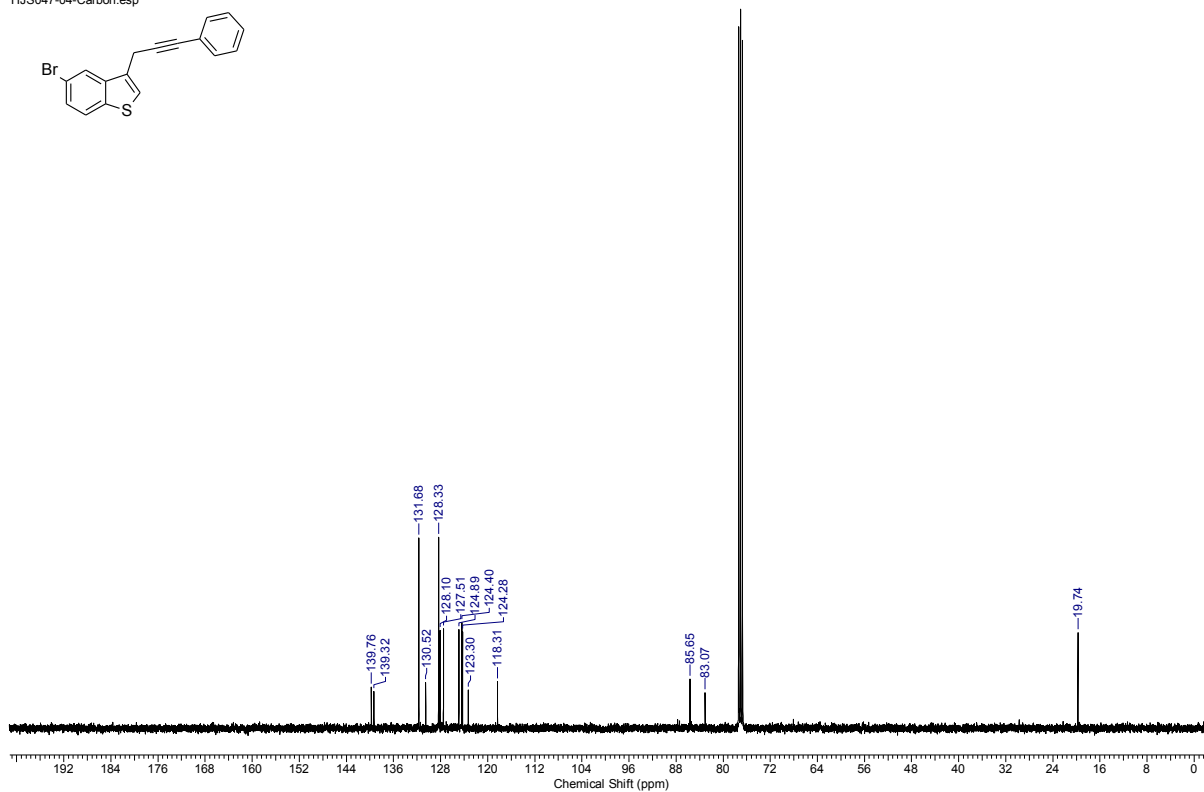

**Supplementary Figure 55.**  
**8p**  $^1\text{H}$  NMR (400 MHz,  $\text{CDCl}_3$ )

HJS018-04-PROTON.ESP

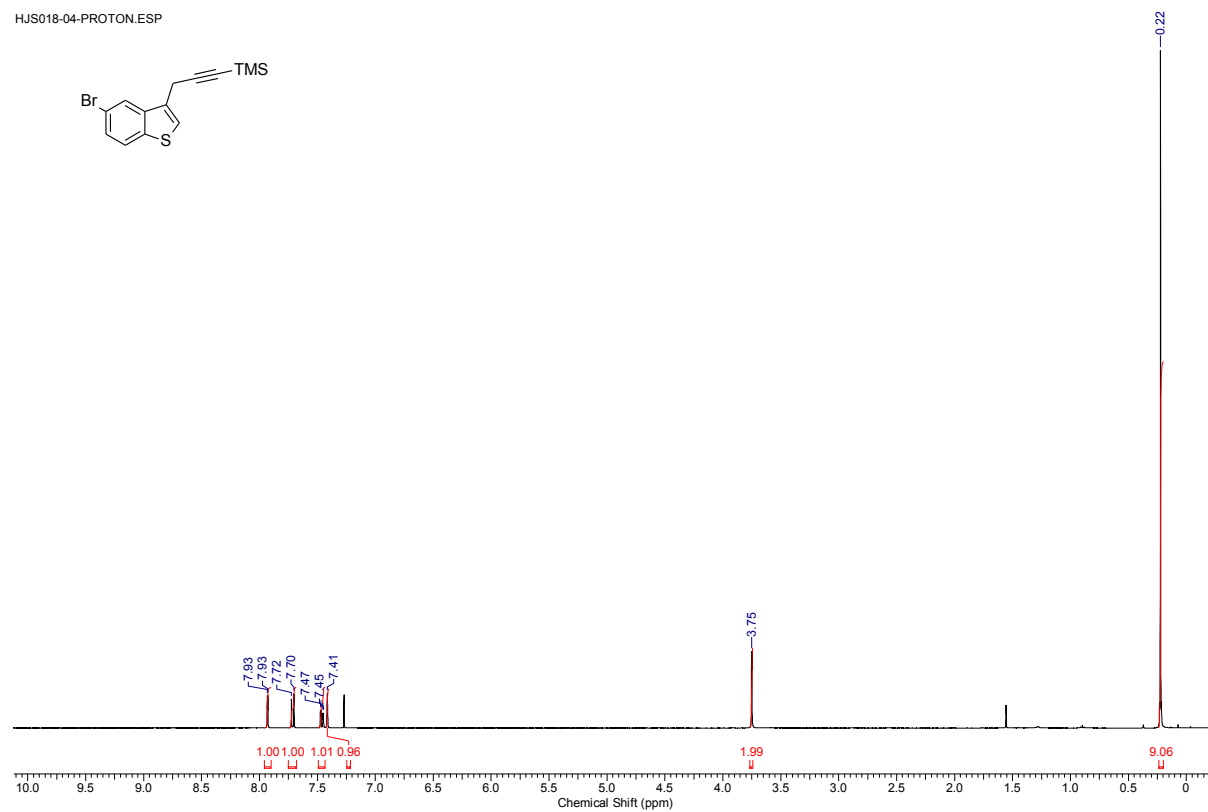

**8p**  $^{13}\text{C}$  NMR (101 MHz,  $\text{CDCl}_3$ )

HJS018-04-CARBON.ESP

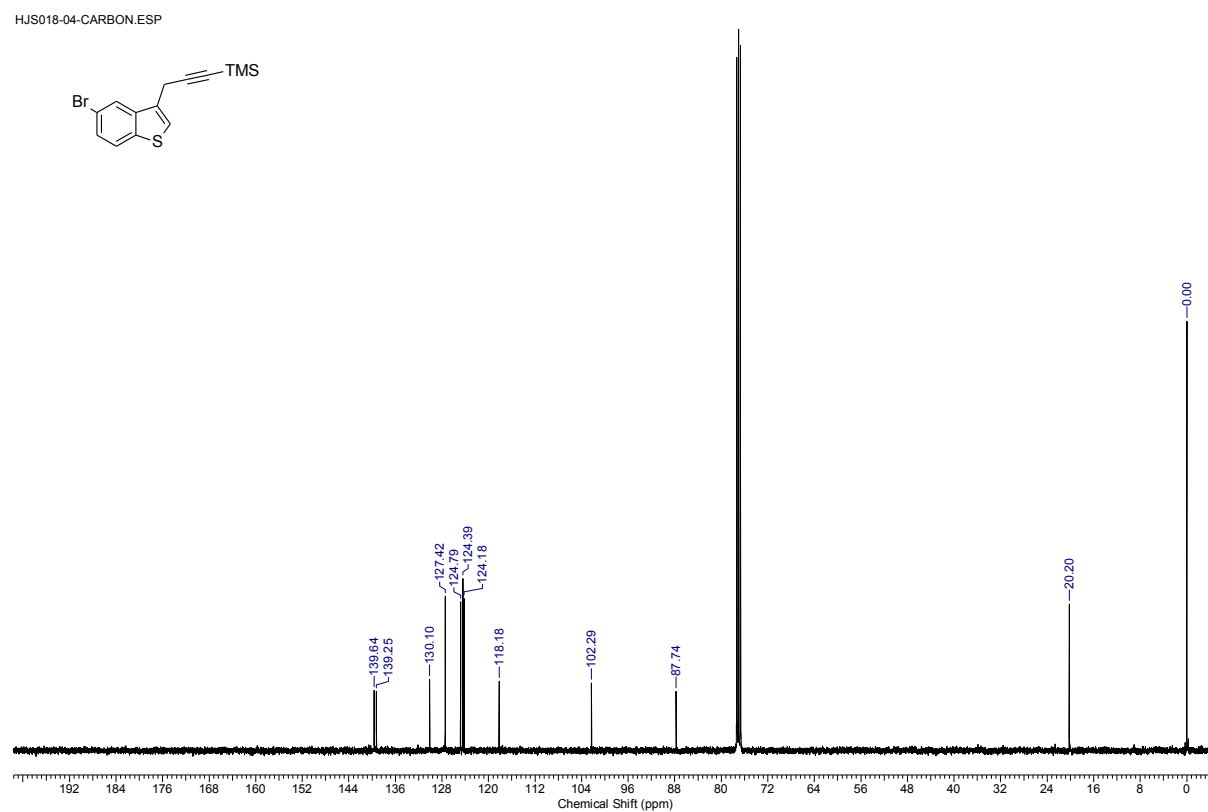

**Supplementary Figure 56.**  
**8q**  $^1\text{H}$  NMR (400 MHz,  $\text{CDCl}_3$ )

HJS033-04-PROTON.ESP

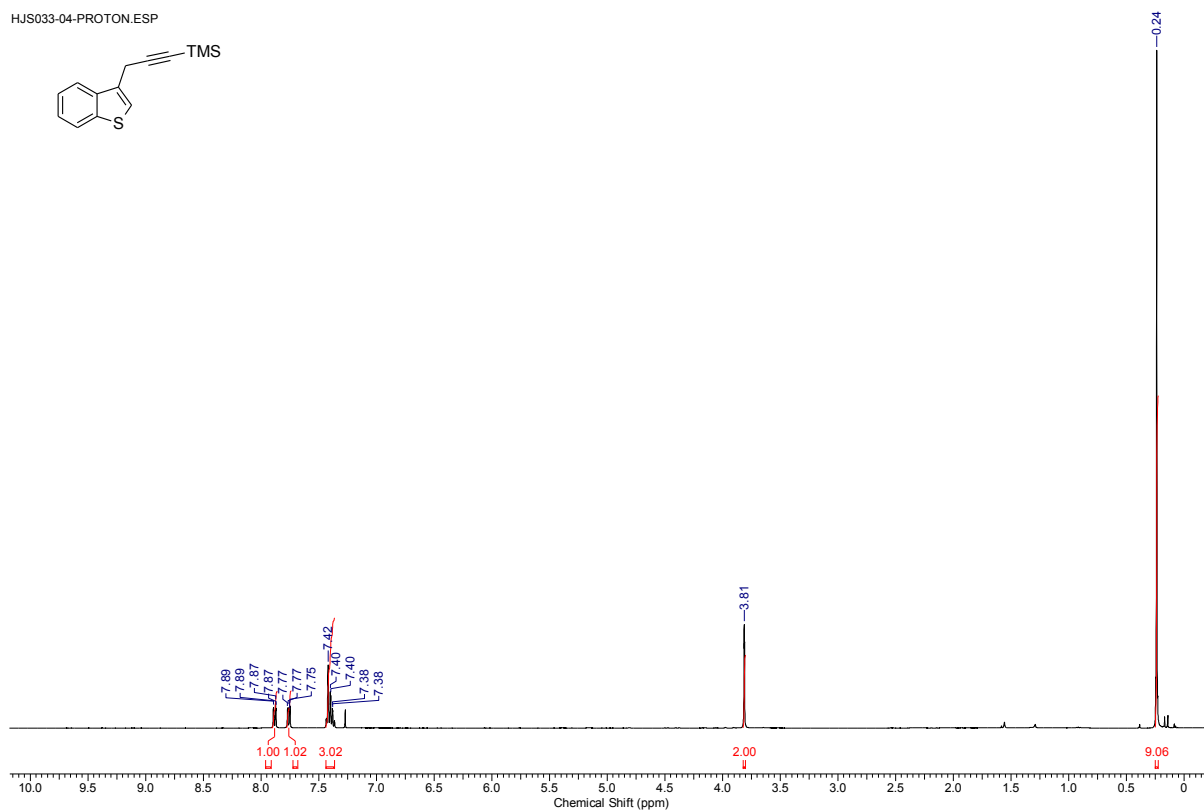

**8q**  $^{13}\text{C}$  NMR (101 MHz,  $\text{CDCl}_3$ )

HJS033-04-CARBON.ESP

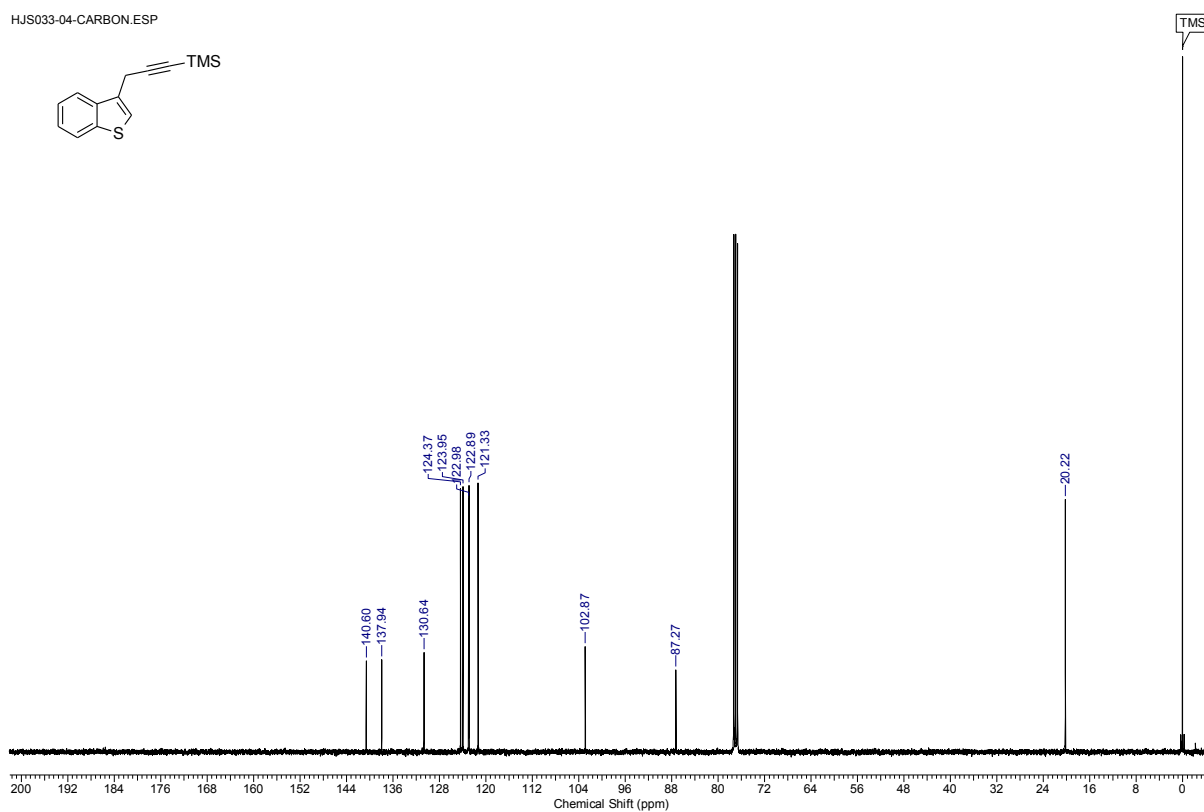

**Supplementary Figure 57.**  
**8r**  $^1\text{H}$  NMR (400 MHz,  $\text{CDCl}_3$ )

HJS045-04-Proton.esp

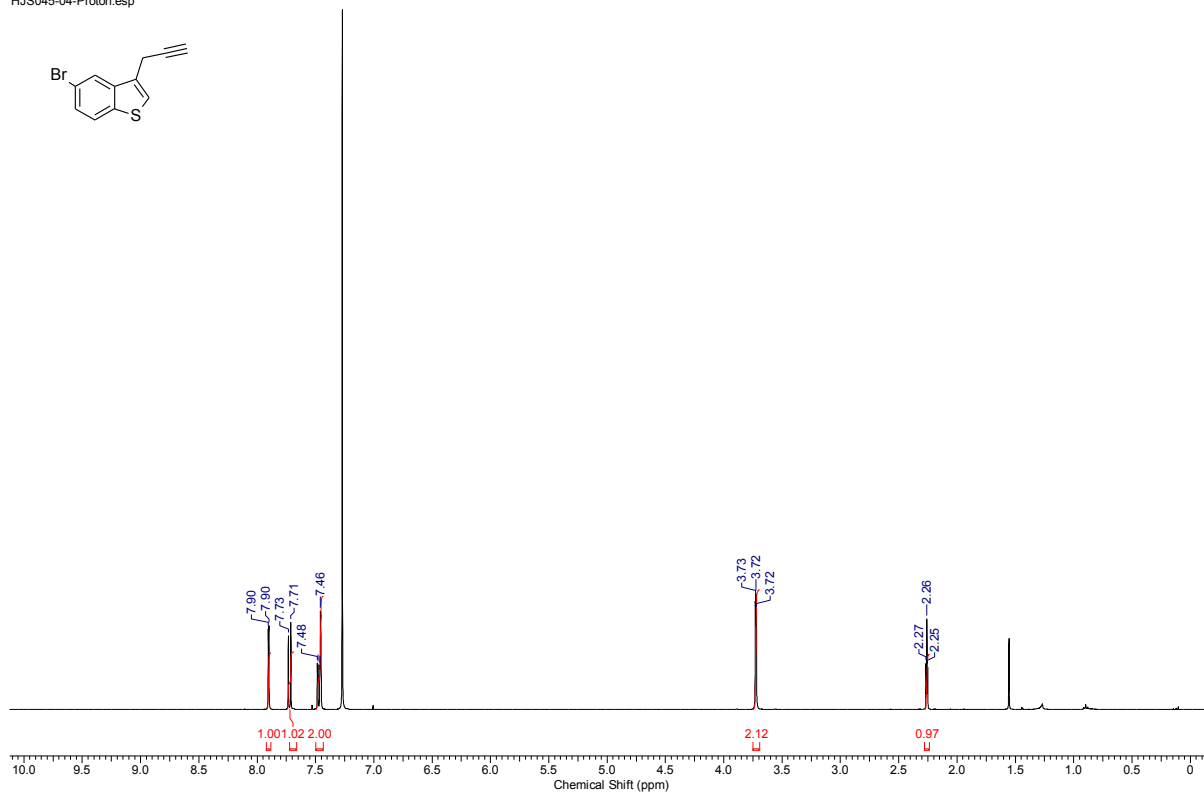

**8r**  $^{13}\text{C}$  NMR (101 MHz,  $\text{CDCl}_3$ )

HJS045-04-Carbon.esp

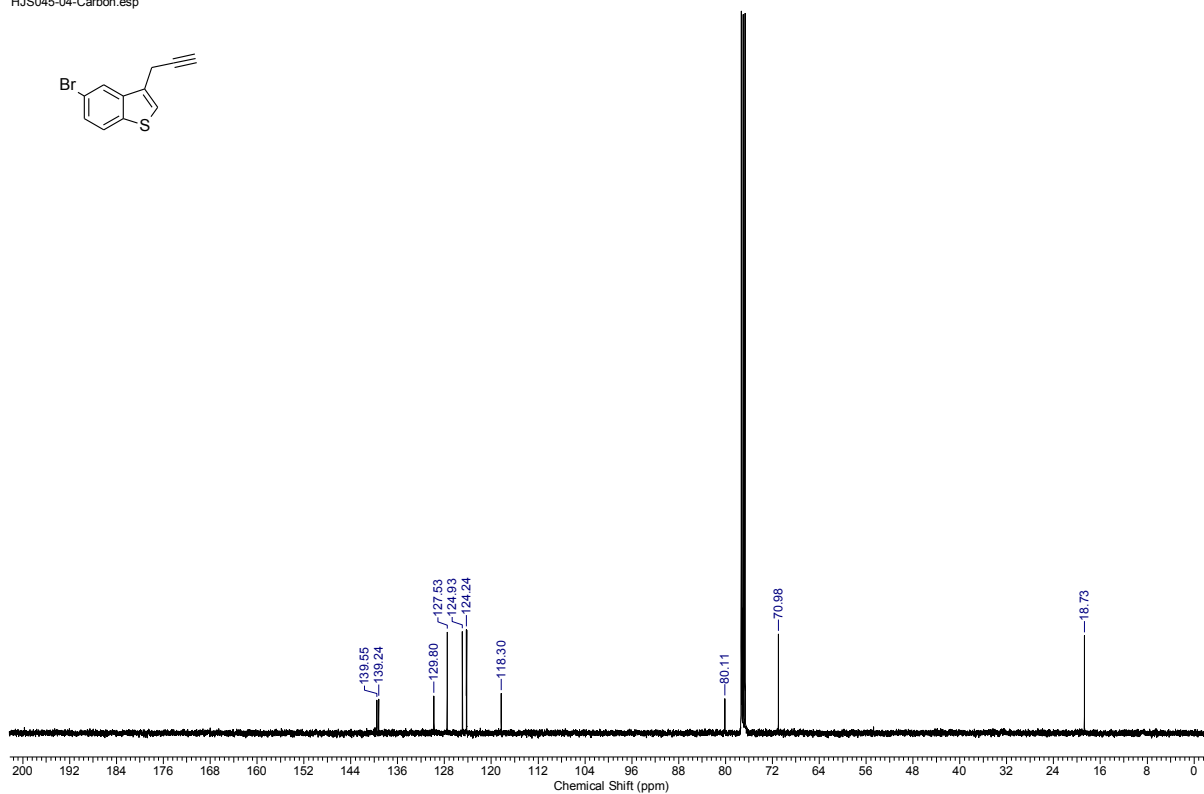

**Supplementary Figure 58.**  
**8s**  $^1\text{H}$  NMR (400 MHz,  $\text{CDCl}_3$ )

HJS02N-04-PROTON.ESP

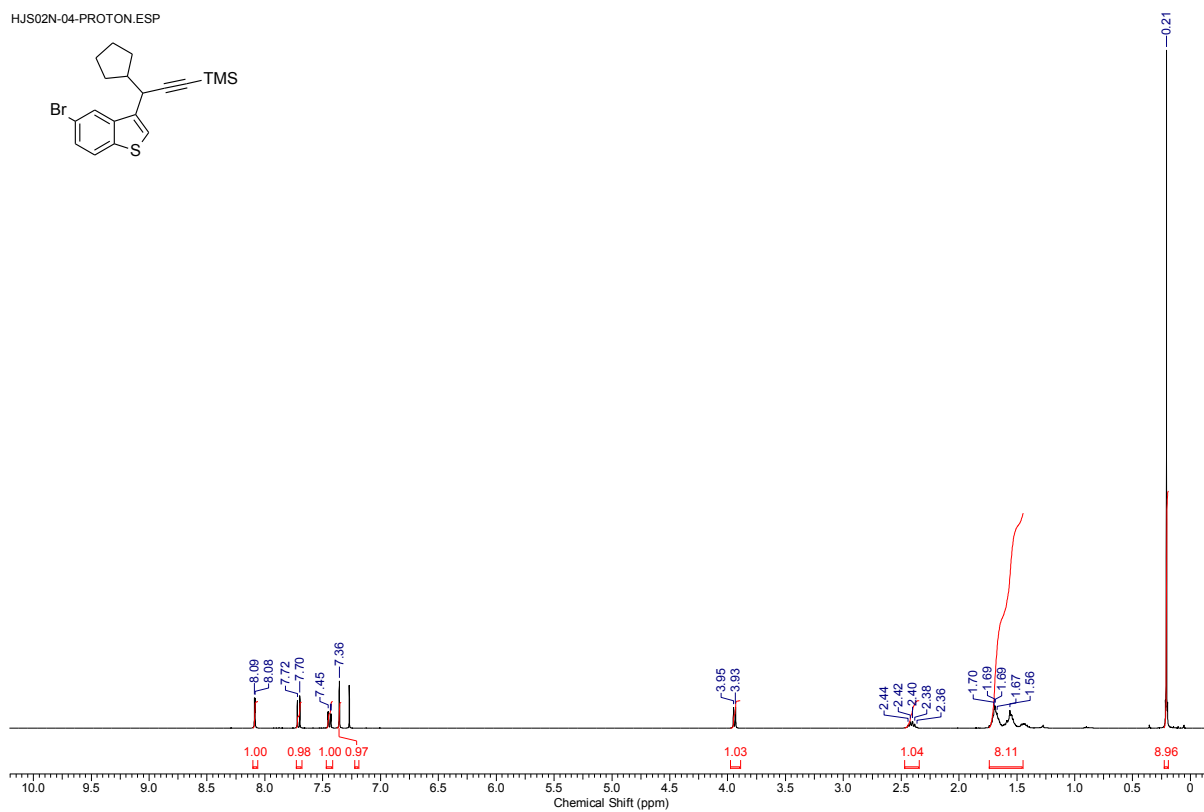

**8s**  $^{13}\text{C}$  NMR (101 MHz,  $\text{CDCl}_3$ )

HJS02N-04-CARBON.ESP

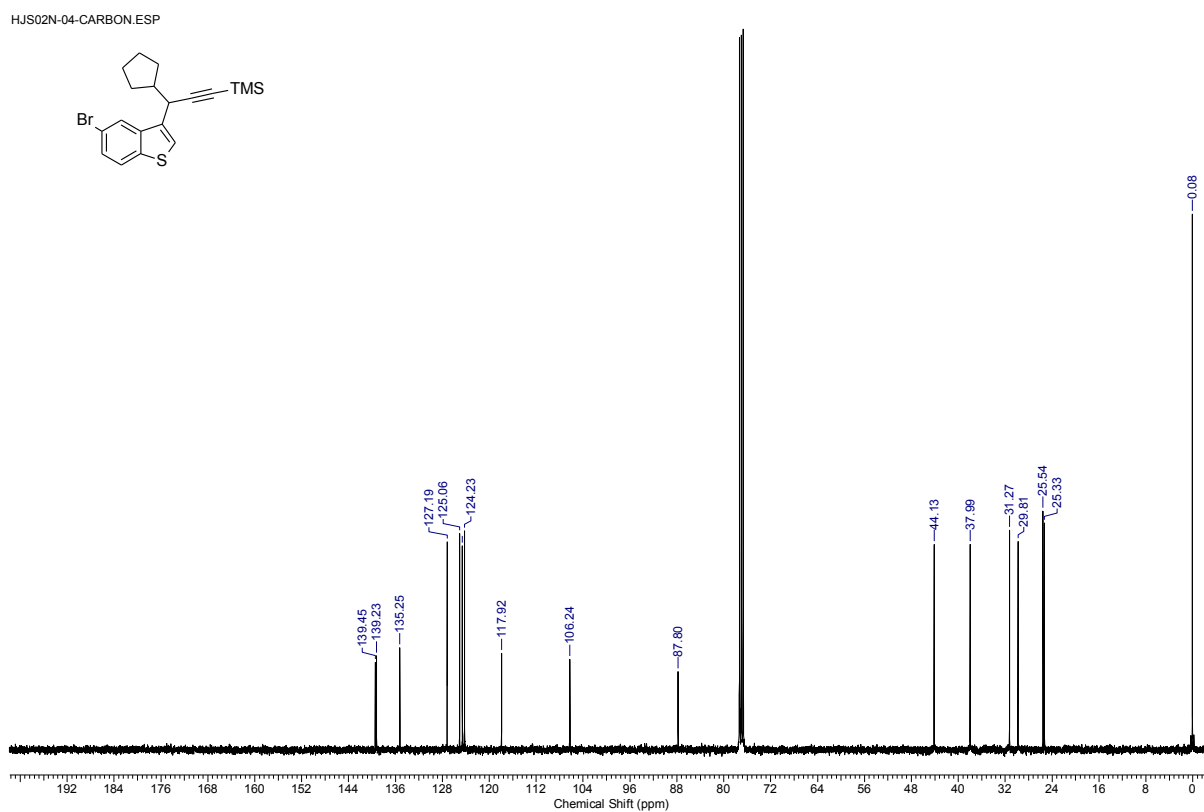

**Supplementary Figure 59.**  
**8t**  $^1\text{H}$  NMR (400 MHz,  $\text{CDCl}_3$ )

HJS016-04-PROTON.ESP

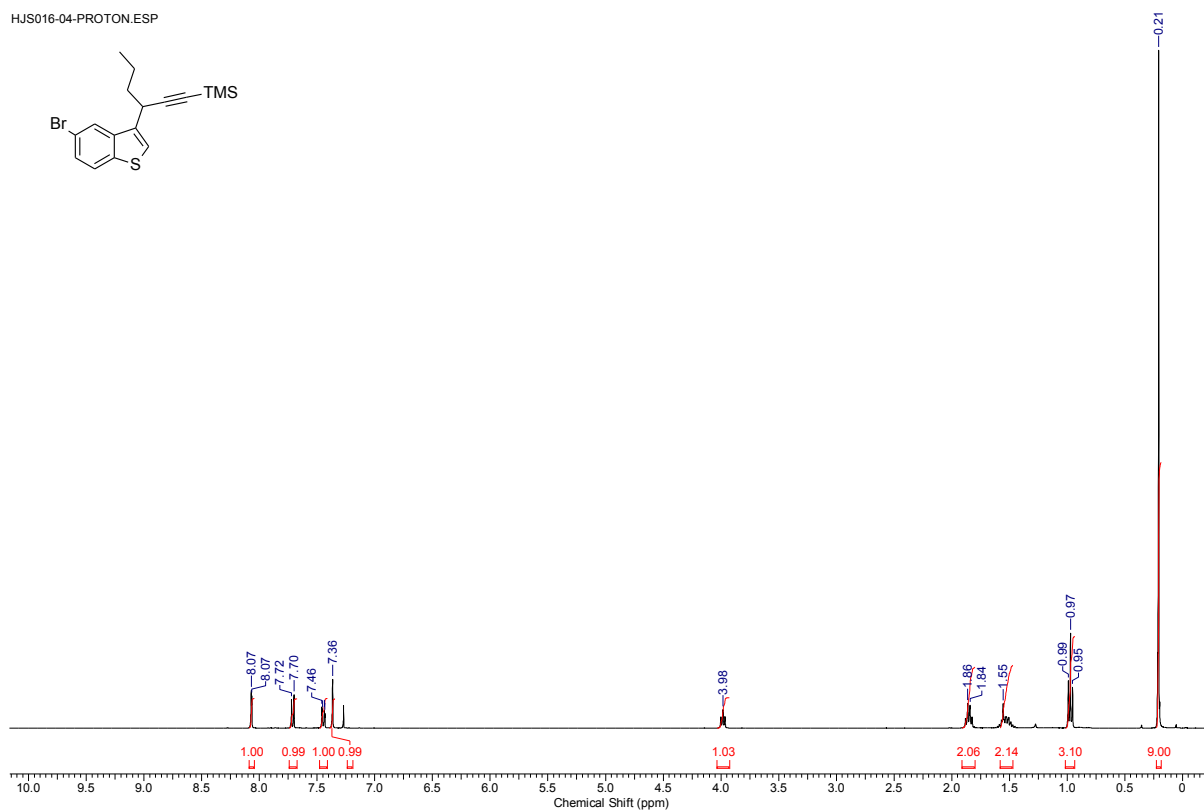

**8t**  $^{13}\text{C}$  NMR (101 MHz,  $\text{CDCl}_3$ )

HJS016-04-CARBON.ESP

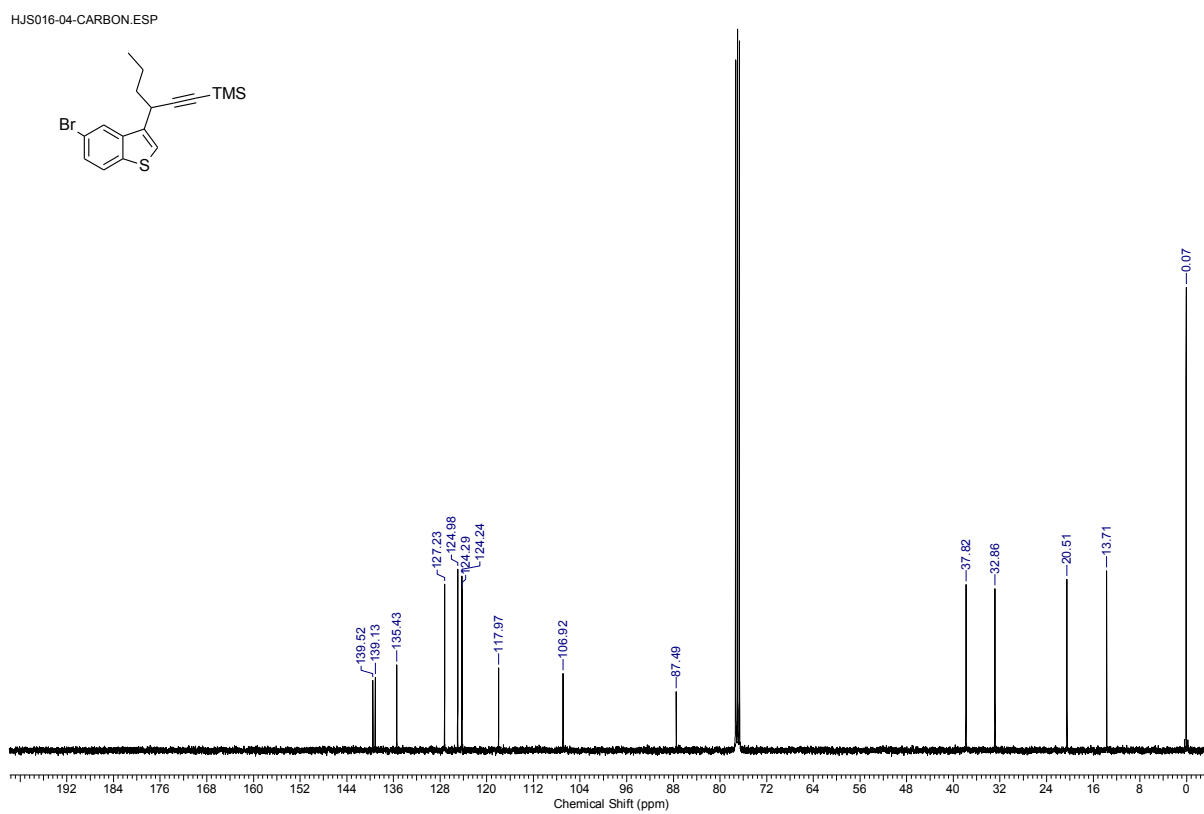

**Supplementary Figure 60.**  
**8u**  $^1\text{H}$  NMR (400 MHz,  $\text{CDCl}_3$ )

CH105.010.001.1r.esp

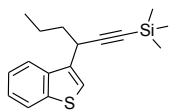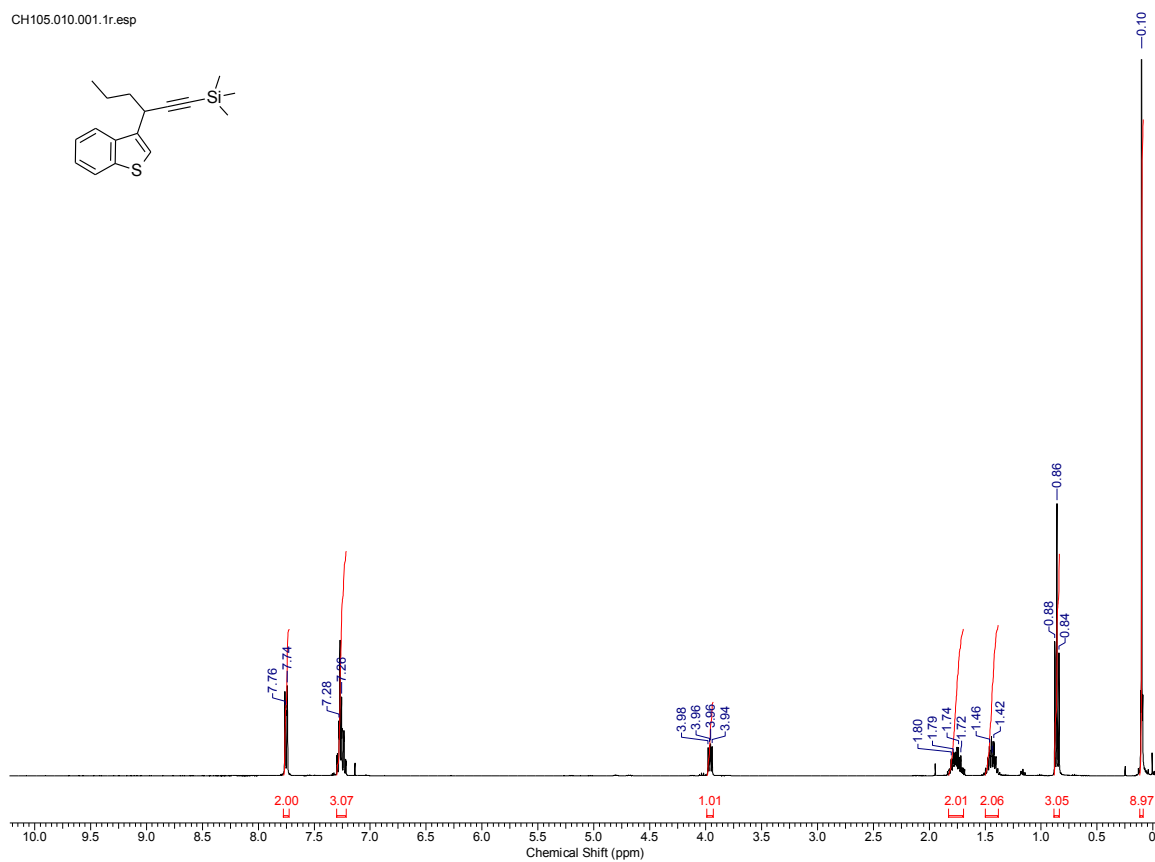

**8u**  $^{13}\text{C}$  NMR (101 MHz,  $\text{CDCl}_3$ )

CH105.012.001.1r.esp

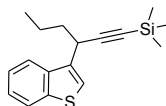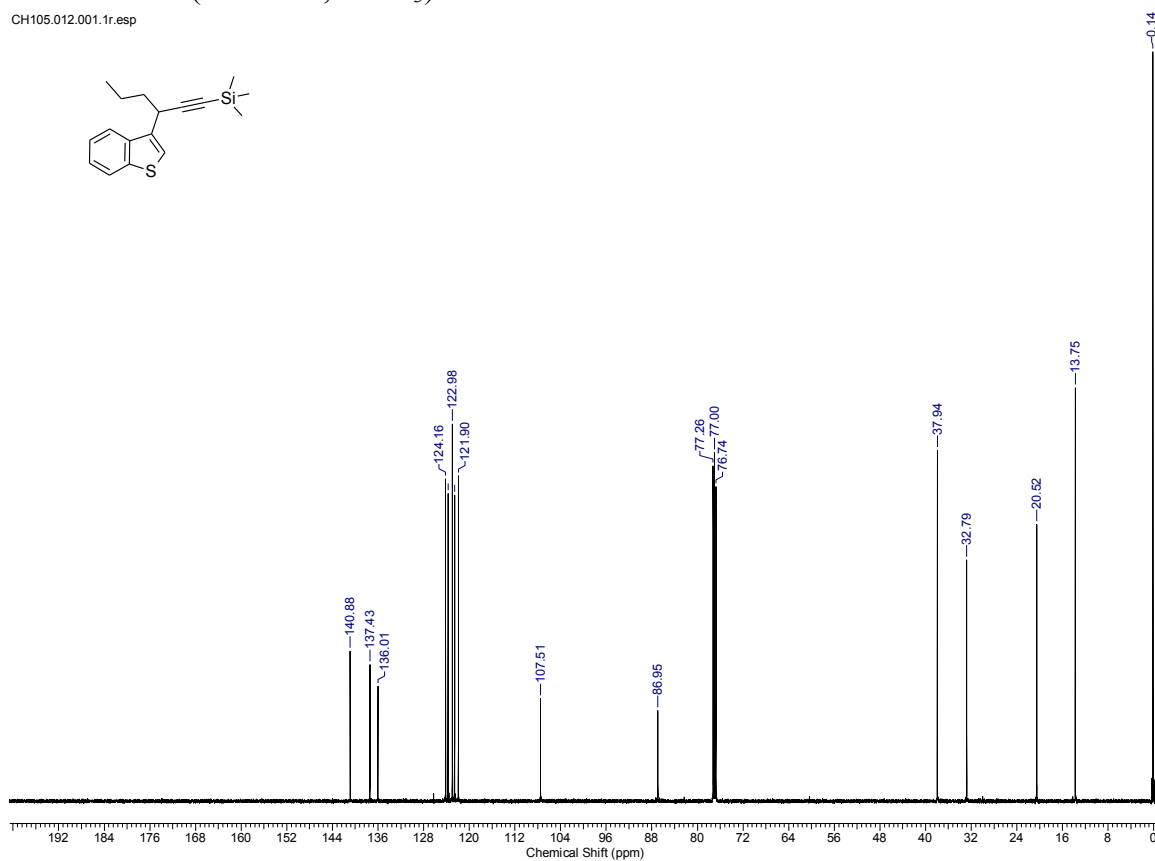



**Supplementary Figure 61.**  
**8v**  $^1\text{H}$  NMR (400 MHz,  $\text{CDCl}_3$ )

20161020-1649-B400\_B.11-31.012.001.1r.esp

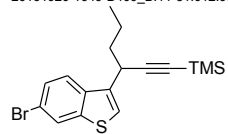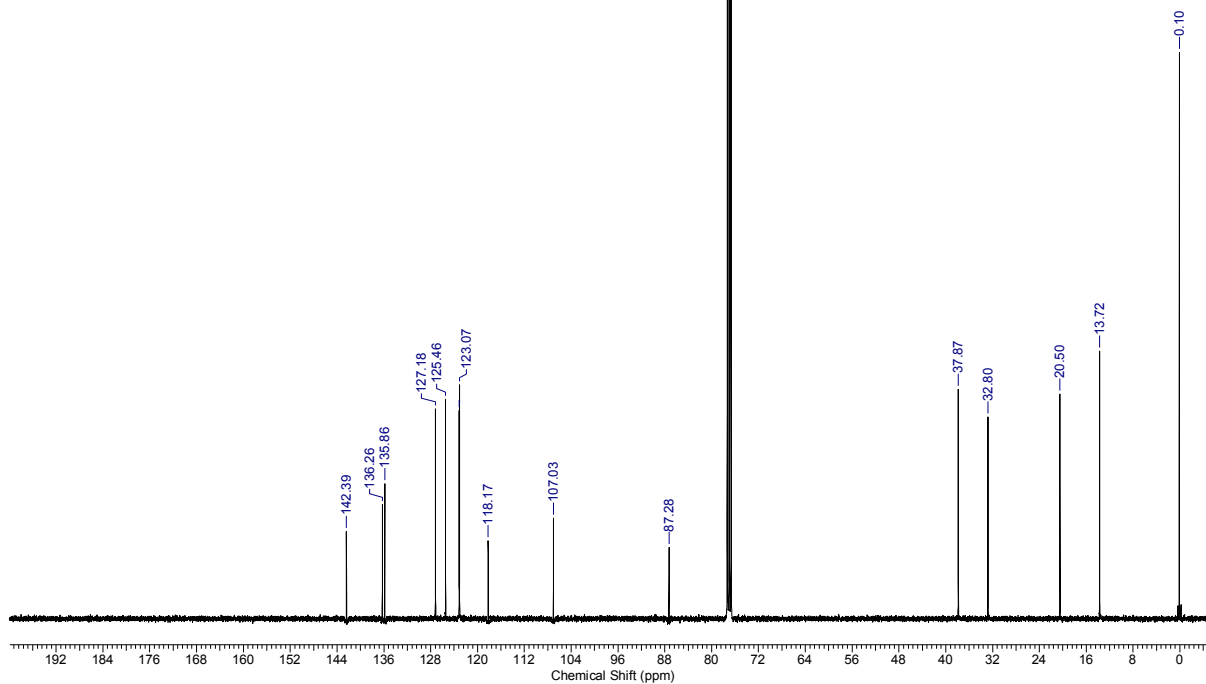

**8v**  $^1\text{H}$  NMR (400 MHz,  $\text{CDCl}_3$ )

20161020-1649-B400\_B.11-31.010.001.1r.esp

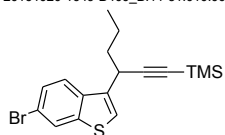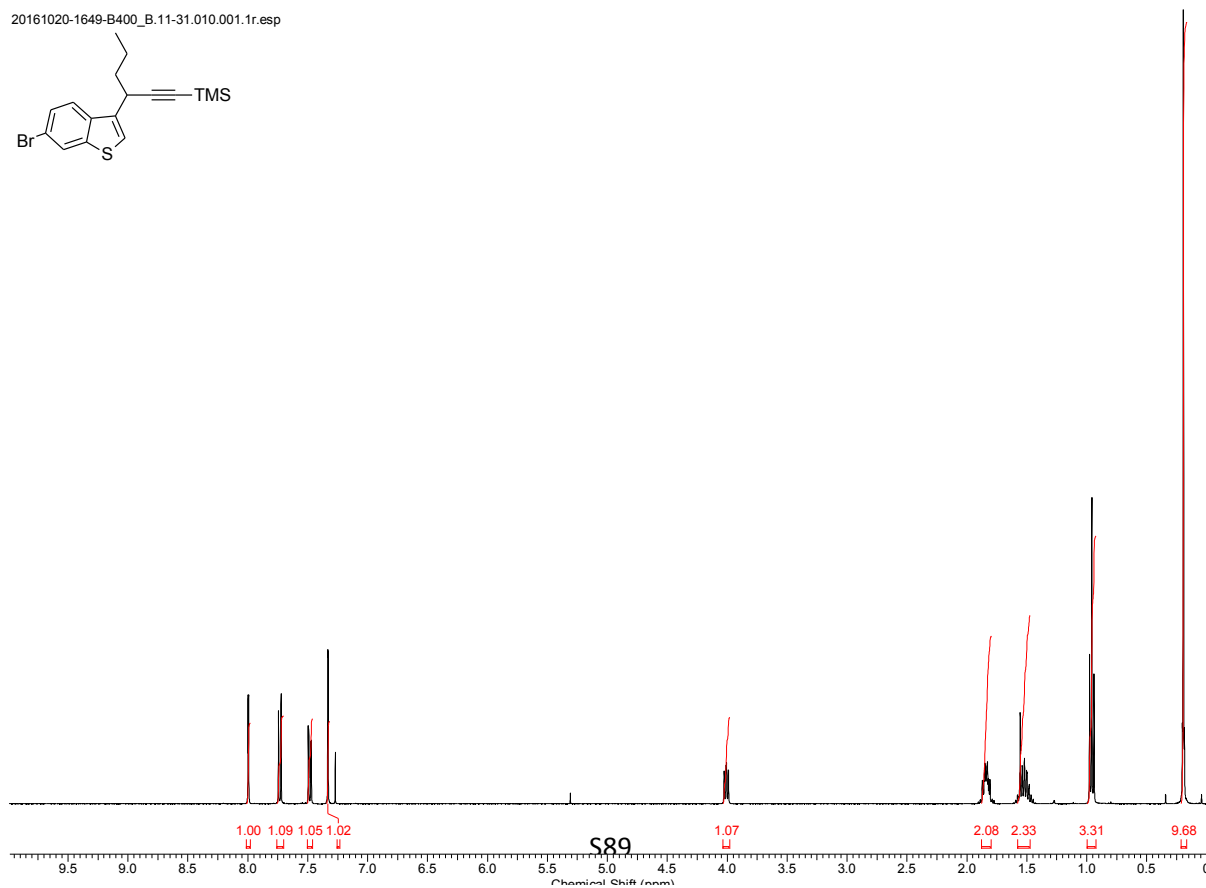

## Supplementary Figure 62.

### X-Ray structure and CCDC number. Compound 3a

CCDC 1511568

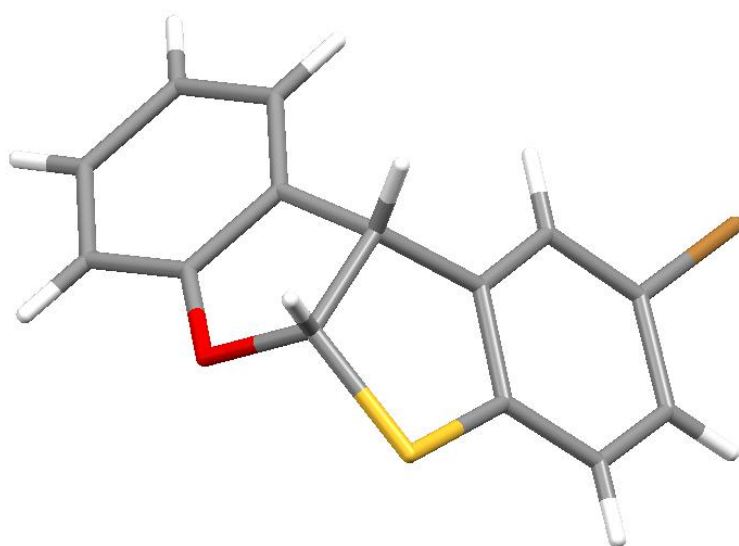

## Supplementary Table 1.

Table 1. Crystal data and structure refinement for s4511ma.

|                                 |                                                                                                                        |
|---------------------------------|------------------------------------------------------------------------------------------------------------------------|
| Identification code             | s4511ma                                                                                                                |
| Empirical formula               | C <sub>14</sub> H <sub>9</sub> Br O S                                                                                  |
| Formula weight                  | 305.18                                                                                                                 |
| Temperature                     | 150(2) K                                                                                                               |
| Wavelength                      | 1.54178 Å                                                                                                              |
| Crystal system, space group     | Monoclinic, P2(1)                                                                                                      |
| Unit cell dimensions            | a = 5.9996(3) Å    alpha = 90 deg.<br>b = 4.9812(3) Å    beta = 91.680(4) deg.<br>c = 18.7925(10) Å    gamma = 90 deg. |
| Volume                          | 561.38(5) Å <sup>3</sup>                                                                                               |
| Z, Calculated density           | 2, 1.805 Mg/m <sup>3</sup>                                                                                             |
| Absorption coefficient          | 6.533 mm <sup>-1</sup>                                                                                                 |
| F(000)                          | 304                                                                                                                    |
| Crystal size                    | 0.190 x 0.150 x 0.030 mm                                                                                               |
| Theta range for data collection | 2.352 to 71.995 deg.                                                                                                   |
| Limiting indices                | -7 ≤ h ≤ 7, -6 ≤ k ≤ 4, -23 ≤ l ≤ 23                                                                                   |
| Reflections collected / unique  | 3042 / 1605 [R(int) = 0.0529]                                                                                          |

Completeness to theta = 67.679 97.8 %

Absorption correction      Semi-empirical from equivalents

Max. and min. transmission      0.828 and 0.586829

Refinement method      Full-matrix least-squares on F<sup>2</sup>

Data / restraints / parameters      1605 / 1 / 154

Goodnes S-of-fit on F<sup>2</sup>      1.065

Final R indices [*I*>2σ(*I*)]      R1 = 0.0411, wR2 = 0.1100

R indices (all data)      R1 = 0.0432, wR2 = 0.1114

Absolute structure parameter      0.03(4)

Extinction coefficient      n/a

Largest diff. peak and hole      1.800 and -0.524 e.Å<sup>-3</sup>

### Supplementary Table 2.

Table 2. Atomic coordinates (x 10<sup>4</sup>) and equivalent isotropic displacement parameters (Å<sup>2</sup> x 10<sup>3</sup>) for s4511ma.

U(eq) is defined as one third of the trace of the orthogonalized U<sub>ij</sub> tensor.

|       | x        | y         | z       | U(eq) |
|-------|----------|-----------|---------|-------|
| Br(1) | 4115(1)  | 12489(2)  | 622(1)  | 27(1) |
| C(1)  | 2418(13) | 9832(18)  | 1120(4) | 25(2) |
| C(2)  | 322(13)  | 9219(17)  | 835(4)  | 26(2) |
| C(3)  | -908(12) | 7280(20)  | 1196(4) | 26(2) |
| C(4)  | -87(12)  | 6181(18)  | 1823(4) | 24(2) |
| C(5)  | 655(12)  | 3977(17)  | 3050(4) | 25(2) |
| C(6)  | 1557(11) | 7260(20)  | 3838(4) | 25(2) |
| C(7)  | 1548(14) | 8947(19)  | 4435(4) | 27(2) |
| C(8)  | 3332(14) | 10680(19) | 4549(4) | 31(2) |
| C(9)  | 5118(13) | 10761(18) | 4081(4) | 28(2) |
| C(10) | 5111(12) | 9022(19)  | 3496(4) | 27(2) |
| C(11) | 3307(11) | 7330(20)  | 3375(3) | 24(1) |
| C(12) | 2734(12) | 5445(17)  | 2771(4) | 24(2) |
| C(13) | 2041(11) | 6862(14)  | 2086(4) | 21(2) |
| C(14) | 3295(11) | 8760(17)  | 1735(4) | 22(2) |
| O(1)  | -104(9)  | 5554(12)  | 3650(3) | 27(1) |
| S(1)  | -1418(3) | 3765(4)   | 2340(1) | 27(1) |

### Supplementary Table 3.

Table 3. Bond lengths [Å] and angles [deg] for s4511ma.

|            |           |
|------------|-----------|
| Br(1)-C(1) | 1.929(8)  |
| C(1)-C(14) | 1.363(11) |

|                   |           |
|-------------------|-----------|
| C(1)-C(2)         | 1.386(11) |
| C(2)-C(3)         | 1.404(13) |
| C(2)-H(2)         | 0.9500    |
| C(3)-C(4)         | 1.376(11) |
| C(3)-H(3)         | 0.9500    |
| C(4)-C(13)        | 1.397(10) |
| C(4)-S(1)         | 1.754(8)  |
| C(5)-O(1)         | 1.458(9)  |
| C(5)-C(12)        | 1.550(10) |
| C(5)-S(1)         | 1.799(8)  |
| C(5)-H(5)         | 1.0000    |
| C(6)-O(1)         | 1.348(10) |
| C(6)-C(11)        | 1.384(9)  |
| C(6)-C(7)         | 1.402(12) |
| C(7)-C(8)         | 1.387(12) |
| C(7)-H(7)         | 0.9500    |
| C(8)-C(9)         | 1.406(11) |
| C(8)-H(8)         | 0.9500    |
| C(9)-C(10)        | 1.401(12) |
| C(9)-H(9)         | 0.9500    |
| C(10)-C(11)       | 1.384(12) |
| C(10)-H(10)       | 0.9500    |
| C(11)-C(12)       | 1.505(12) |
| C(12)-C(13)       | 1.516(10) |
| C(12)-H(12)       | 1.0000    |
| C(13)-C(14)       | 1.387(10) |
| C(14)-H(14)       | 0.9500    |
|                   |           |
| C(14)-C(1)-C(2)   | 124.3(8)  |
| C(14)-C(1)-Br(1)  | 118.9(6)  |
| C(2)-C(1)-Br(1)   | 116.7(6)  |
| C(1)-C(2)-C(3)    | 116.7(7)  |
| C(1)-C(2)-H(2)    | 121.7     |
| C(3)-C(2)-H(2)    | 121.7     |
| C(4)-C(3)-C(2)    | 120.5(7)  |
| C(4)-C(3)-H(3)    | 119.8     |
| C(2)-C(3)-H(3)    | 119.8     |
| C(3)-C(4)-C(13)   | 120.4(7)  |
| C(3)-C(4)-S(1)    | 126.1(6)  |
| C(13)-C(4)-S(1)   | 113.4(6)  |
| O(1)-C(5)-C(12)   | 106.3(6)  |
| O(1)-C(5)-S(1)    | 112.3(5)  |
| C(12)-C(5)-S(1)   | 108.8(5)  |
| O(1)-C(5)-H(5)    | 109.8     |
| C(12)-C(5)-H(5)   | 109.8     |
| S(1)-C(5)-H(5)    | 109.8     |
| O(1)-C(6)-C(11)   | 114.9(8)  |
| O(1)-C(6)-C(7)    | 124.5(6)  |
| C(11)-C(6)-C(7)   | 120.5(9)  |
| C(8)-C(7)-C(6)    | 118.5(7)  |
| C(8)-C(7)-H(7)    | 120.8     |
| C(6)-C(7)-H(7)    | 120.8     |
| C(7)-C(8)-C(9)    | 121.3(8)  |
| C(7)-C(8)-H(8)    | 119.3     |
| C(9)-C(8)-H(8)    | 119.3     |
| C(10)-C(9)-C(8)   | 119.2(8)  |
| C(10)-C(9)-H(9)   | 120.4     |
| C(8)-C(9)-H(9)    | 120.4     |
| C(11)-C(10)-C(9)  | 119.3(7)  |
| C(11)-C(10)-H(10) | 120.3     |

|                   |          |
|-------------------|----------|
| C(9)-C(10)-H(10)  | 120.3    |
| C(10)-C(11)-C(6)  | 121.1(8) |
| C(10)-C(11)-C(12) | 131.6(6) |
| C(6)-C(11)-C(12)  | 107.2(7) |
| C(11)-C(12)-C(13) | 113.6(7) |
| C(11)-C(12)-C(5)  | 102.0(6) |
| C(13)-C(12)-C(5)  | 107.6(6) |
| C(11)-C(12)-H(12) | 111.1    |
| C(13)-C(12)-H(12) | 111.1    |
| C(5)-C(12)-H(12)  | 111.1    |
| C(14)-C(13)-C(4)  | 120.0(7) |
| C(14)-C(13)-C(12) | 125.6(7) |
| C(4)-C(13)-C(12)  | 114.4(7) |
| C(1)-C(14)-C(13)  | 117.9(7) |
| C(1)-C(14)-H(14)  | 121.0    |
| C(13)-C(14)-H(14) | 121.0    |
| C(6)-O(1)-C(5)    | 107.2(6) |
| C(4)-S(1)-C(5)    | 93.1(4)  |

---

Symmetry transformations used to generate equivalent atoms:

#### Supplementary Table 4.

Table 4. Anisotropic displacement parameters ( $\text{\AA}^2 \times 10^3$ ) for s4511ma.

The anisotropic displacement factor exponent takes the form:

$$-2 \pi^2 [ h^2 a^{*2} U_{11} + \dots + 2 h k a^* b^* U_{12} ]$$

---

|       | U11   | U22   | U33   | U23   | U13   | U12   |
|-------|-------|-------|-------|-------|-------|-------|
| Br(1) | 25(1) | 26(1) | 30(1) | 1(1)  | 5(1)  | -4(1) |
| C(1)  | 21(4) | 27(4) | 26(3) | -1(3) | 5(3)  | 4(3)  |
| C(2)  | 23(4) | 24(4) | 30(4) | -1(3) | 1(3)  | 5(3)  |
| C(3)  | 21(3) | 25(4) | 32(3) | -4(4) | 1(3)  | -3(4) |
| C(4)  | 11(3) | 24(4) | 36(4) | -8(3) | 5(3)  | -2(3) |
| C(5)  | 22(4) | 26(4) | 29(3) | 1(3)  | 9(3)  | 2(3)  |
| C(6)  | 22(3) | 19(4) | 34(3) | 7(4)  | 5(3)  | 3(4)  |
| C(7)  | 25(4) | 29(5) | 27(3) | 0(3)  | 6(3)  | 1(3)  |
| C(8)  | 25(4) | 38(5) | 29(4) | -1(4) | -3(3) | 5(4)  |
| C(9)  | 19(4) | 29(5) | 35(4) | 2(3)  | -3(3) | 0(3)  |
| C(10) | 15(4) | 34(5) | 31(4) | 4(3)  | -1(3) | 2(3)  |
| C(11) | 17(3) | 27(4) | 27(3) | 8(4)  | 0(2)  | 0(4)  |
| C(12) | 15(3) | 26(4) | 30(4) | 0(3)  | 2(3)  | 2(3)  |
| C(13) | 14(3) | 22(5) | 29(3) | -5(3) | 4(3)  | -2(2) |
| C(14) | 12(3) | 20(4) | 33(4) | -8(3) | 6(3)  | -3(3) |
| O(1)  | 20(3) | 30(3) | 31(3) | -2(2) | 5(2)  | -4(2) |
| S(1)  | 18(1) | 29(1) | 35(1) | 1(1)  | 4(1)  | -5(1) |

---

**Supplementary Table 5.**Table 5. Hydrogen coordinates ( $\times 10^4$ ) and isotropic displacement parameters ( $\text{\AA}^2 \times 10^3$ ) for s4511ma.

|       | x     | y     | z    | U(eq) |
|-------|-------|-------|------|-------|
| H(2)  | -252  | 10070 | 416  | 31    |
| H(3)  | -2318 | 6717  | 1007 | 31    |
| H(5)  | 1078  | 2132  | 3214 | 31    |
| H(7)  | 349   | 8905  | 4753 | 33    |
| H(8)  | 3347  | 11836 | 4951 | 37    |
| H(9)  | 6316  | 11982 | 4162 | 34    |
| H(10) | 6331  | 9000  | 3185 | 32    |
| H(12) | 3979  | 4155  | 2692 | 29    |
| H(14) | 4720  | 9296  | 1917 | 26    |

**Supplementary Table 6.**

Table 6. Torsion angles [deg] for s4511ma.

|                         |           |
|-------------------------|-----------|
| C(14)-C(1)-C(2)-C(3)    | -2.8(13)  |
| Br(1)-C(1)-C(2)-C(3)    | 179.8(6)  |
| C(1)-C(2)-C(3)-C(4)     | 3.5(13)   |
| C(2)-C(3)-C(4)-C(13)    | -3.9(13)  |
| C(2)-C(3)-C(4)-S(1)     | 179.5(7)  |
| O(1)-C(6)-C(7)-C(8)     | -177.4(8) |
| C(11)-C(6)-C(7)-C(8)    | -0.2(13)  |
| C(6)-C(7)-C(8)-C(9)     | 0.0(13)   |
| C(7)-C(8)-C(9)-C(10)    | -1.1(13)  |
| C(8)-C(9)-C(10)-C(11)   | 2.5(12)   |
| C(9)-C(10)-C(11)-C(6)   | -2.7(13)  |
| C(9)-C(10)-C(11)-C(12)  | 174.3(9)  |
| O(1)-C(6)-C(11)-C(10)   | 179.1(8)  |
| C(7)-C(6)-C(11)-C(10)   | 1.6(14)   |
| O(1)-C(6)-C(11)-C(12)   | 1.4(11)   |
| C(7)-C(6)-C(11)-C(12)   | -176.1(8) |
| C(10)-C(11)-C(12)-C(13) | -71.8(12) |
| C(6)-C(11)-C(12)-C(13)  | 105.5(8)  |
| C(10)-C(11)-C(12)-C(5)  | 172.7(10) |
| C(6)-C(11)-C(12)-C(5)   | -10.0(9)  |
| O(1)-C(5)-C(12)-C(11)   | 14.7(8)   |
| S(1)-C(5)-C(12)-C(11)   | 135.9(6)  |
| O(1)-C(5)-C(12)-C(13)   | -105.1(7) |
| S(1)-C(5)-C(12)-C(13)   | 16.1(8)   |
| C(3)-C(4)-C(13)-C(14)   | 3.4(12)   |
| S(1)-C(4)-C(13)-C(14)   | -179.7(6) |
| C(3)-C(4)-C(13)-C(12)   | -178.6(8) |
| S(1)-C(4)-C(13)-C(12)   | -1.7(8)   |
| C(11)-C(12)-C(13)-C(14) | 56.1(9)   |
| C(5)-C(12)-C(13)-C(14)  | 168.3(7)  |
| C(11)-C(12)-C(13)-C(4)  | -121.7(7) |
| C(5)-C(12)-C(13)-C(4)   | -9.6(9)   |
| C(2)-C(1)-C(14)-C(13)   | 2.3(12)   |
| Br(1)-C(1)-C(14)-C(13)  | 179.7(6)  |
| C(4)-C(13)-C(14)-C(1)   | -2.5(11)  |

|                        |           |
|------------------------|-----------|
| C(12)-C(13)-C(14)-C(1) | 179.8(7)  |
| C(11)-C(6)-O(1)-C(5)   | 8.6(10)   |
| C(7)-C(6)-O(1)-C(5)    | -174.0(8) |
| C(12)-C(5)-O(1)-C(6)   | -14.6(8)  |
| S(1)-C(5)-O(1)-C(6)    | -133.5(6) |
| C(3)-C(4)-S(1)-C(5)    | -173.1(8) |
| C(13)-C(4)-S(1)-C(5)   | 10.1(6)   |
| O(1)-C(5)-S(1)-C(4)    | 102.3(6)  |
| C(12)-C(5)-S(1)-C(4)   | -15.1(6)  |

---

Symmetry transformations used to generate equivalent atoms:

### Supplementary Table 7.

Table 7. Hydrogen bonds for s4511ma [Å and deg.].

---

| D-H...A              | d(D-H) | d(H...A) | d(D...A) | <(DHA) |
|----------------------|--------|----------|----------|--------|
| C(12)-H(12)...S(1)#1 | 1.00   | 2.86     | 3.719(8) | 143.8  |
| C(3)-H(3)...Br(1)#2  | 0.95   | 3.07     | 3.948(9) | 153.6  |

---

Symmetry transformations used to generate equivalent atoms:

#1 x+1,y,z #2 x-1,y-1,z

### Supplementary References

- 1] Pouzet, P., Erdelmeier, I., Dansette, P. M. & Mansuy, D. Synthesis of (4-chlorophenyl)-(1-oxo-1 $\lambda^4$ -benzo[b]thien-2-yl)methanone and study of its reactivity towards sulfur- and oxygen-containing nucleophiles. *Tetrahedron*, **54**, 14811-14824 (1998).
- 2] Iaroshenko, V. O., Ali, S., Mkrtchyan, S., Gevorgyan, A., Babar, T. M., Semeniuchenko, V., Hassan, Z., Villinger, A. & Langer, P. Design and synthesis of condensed thienocoumarins by Suzuki–Miyaura reaction/lactonization tandem protocol. *Tetrahedron Letters*, **53**, 7135-7139 (2012).
- 3] Blanco, B., Sedes, A., Peón, A., Lamb, H., Hawkins, A. R. Castedo, L. & González-Bello, C. Synthesis of 3-alkyl enol mimics inhibitors of type II dehydroquinase: factors influencing their inhibition potency. *Org. Biomol. Chem.* **10**, 3662-3676 (2012).
